# Supplementary material for: SLC25A12 Missense Variant in Nova Scotia Duck Tolling Retrievers Affected by Cerebellar Degeneration—Myositis Complex (CDMC)
Source: Genes (Basel). 2022 Jul 9;13(7):1223. doi: 10.3390/genes13071223 (PMC9319113; doi:10.3390/genes13071223)
Supplement: Supplementary file 1 [file genes-13-01223-s001.zip › Table_S1_Public_Genomes.xlsx]

## Sheet: Sheet1
Table S1. Accession numbers of 566 dog genome sequences. The affected Nova Scotia Duck Tolling Retriever dog is highlighted in red. The other 565 genome sequences were used as controls in variant filtering.
Sample ID	Breed	Study Accession	Sample Accession	Remark
20191520	Brandlbracke	PRJEB16012	SAMEA6862978
AC144	Australian Cattle dog	PRJEB16012	SAMEA8797072
AC160	Australian Cattle dog	PRJEB16012	SAMEA7198609
AC483	Australian Cattle Dog	PRJEB16012	SAMEA8157152
AC530	Australian Cattle dog	PRJEB16012	SAMEA7198606
AD101	Alpine Dachsbracke	PRJEB16012	SAMEA8797083
AD129	Alpine Dachsbracke	PRJEB16012	SAMEA8797084
AD234	Alpine Dachsbracke	PRJEB16012	SAMEA8797082
AKIN000001	Akita Inu	PRJNA188158	SAMN21036191
AKIN000002	Akita Inu	PRJNA188158	SAMN21036192
AKIT000009	American Akita	PRJNA188158	SAMN21036183
ALDB000001	Alpine Dachsbracke	PRJNA188158	SAMN21036179
ALDB000002	Alpine Dachsbracke	PRJNA188158	SAMN21036180
ALDB000003	Alpine Dachsbracke	PRJNA188158	SAMN21036181
ALDB000004	Alpine Dachsbracke	PRJNA188158	SAMN21036182
AMAL000003	Alaskan Malamute	PRJNA188158	SAMN21036196
AMBD000001	American Bulldog	PRJNA188158	SAMN21036184
AMST000004	American Staffordshire Terrier	PRJNA188158	SAMN21036206
AMST000005	American Staffordshire Terrier	PRJNA188158	SAMN21036207
ANAT000003	Anatolian Dog	PRJNA188158	SAMN21036208
APPZ000001	Appenzeller Sennenhund	PRJNA188158	SAMN21036197
APPZ000002	Appenzeller Sennenhund	PRJNA188158	SAMN21036198
APPZ000003	Appenzeller Sennenhund	PRJNA188158	SAMN21036202
APPZ000009	Appenzeller Sennenhund	PRJNA188158	SAMN21036199
APPZ000010	Appenzeller Sennenhund	PRJNA188158	SAMN21036200
APPZ000011	Appenzeller Sennenhund	PRJNA188158	SAMN21036201
APPZ000012	Appenzeller Sennenhund	PRJNA188158	SAMN21036203
APPZ000013	Appenzeller Sennenhund	PRJNA188158	SAMN21036204
APPZ000014	Appenzeller Sennenhund	PRJNA188158	SAMN21036205
AU190	Australian Shepherd	PRJEB16012	SAMEA6862957
AU193	Australian Shepherd	PRJEB16012	SAMEA6862979
AU254	Australian Shepherd	PRJEB16012	SAMEA6862980
AU287	Australian Shepherd	PRJEB16012	SAMEA10644714
AUCD000004	Australian Cattle Dog	PRJNA188158	SAMN21036177
AUCD000005	Australian Cattle Dog	PRJNA188158	SAMN21036178
AUSK000001	Australian Kelpie	PRJNA188158	SAMN21036193
AUSK000002	Australian Kelpie	PRJNA188158	SAMN21036194
AUSK000003	Australian Kelpie	PRJNA188158	SAMN21036195
AUSS000002	Australian Shepherd	PRJNA188158	SAMN21036209
BASS000004	Basset Hound	PRJNA188158	SAMN21036226
BBLS000001	Berger Blanc Suisse	PRJNA188158	SAMN21036213
BBLS000002	Berger Blanc Suisse	PRJNA188158	SAMN21036214
BBLS000003	Berger Blanc Suisse	PRJNA188158	SAMN21036215
BEAU000003	Beauceron	PRJNA188158	SAMN21036221
BERG000001	Bergamasco Sheepdog	PRJNA188158	SAMN21036235
BERG000002	Bergamasco Sheepdog	PRJNA188158	SAMN21036236
BERG000003	Bergamasco Sheepdog	PRJNA188158	SAMN21036237
BERG000004	Bergamasco Sheepdog	PRJNA188158	SAMN21036238
BERG000005	Bergamasco Sheepdog	PRJNA188158	SAMN21036239
BERG000006	Bergamasco Sheepdog	PRJNA188158	SAMN21036240
BG235	Bavarian Mountain Scent Hound (Bayerischer Gebirgsschweisshund)	PRJEB16012	SAMEA8797080
BG240	Bavarian Mountain Scent Hound (Bayerischer Gebirgsschweisshund)	PRJEB16012	SAMEA8797081
BG281	Bavarian Mountain Scent Hound (Bayerischer Gebirgsschweisshund)	PRJEB16012	SAMEA8797079
BH010	Basset Hound	PRJEB16012	SAMEA6862953
BH013	Basset Hound	PRJEB16012	SAMEA6862982
BH014	Basset Hound	PRJEB16012	SAMEA6862983
BH015	Basset Hound	PRJEB16012	SAMEA6862984
BH016	Basset Hound	PRJEB16012	SAMEA6862985
BLNK000001	Bolonka Zwetna	PRJNA188158	SAMN21036255
BLNK000002	Bolonka Zwetna	PRJNA188158	SAMN21036256
BLNK000003	Bolonka Zwetna	PRJNA188158	SAMN21036257
BLNK000004	Bolonka Zwetna	PRJNA188158	SAMN21036258
BMAL000003	Belgian Shepherd (Laekenois)	PRJNA188158	SAMN21036377
BMSH000001	Bavarian Mountain Scent Hound (Bayerischer Gebirgsschweisshund)	PRJNA188158	SAMN21036222
BMSH000002	Bavarian Mountain Scent Hound (Bayerischer Gebirgsschweisshund)	PRJNA188158	SAMN21036223
BMSH000003	Bavarian Mountain Scent Hound (Bayerischer Gebirgsschweisshund)	PRJNA188158	SAMN21036224
BMSH000004	Bavarian Mountain Scent Hound (Bayerischer Gebirgsschweisshund)	PRJNA188158	SAMN21036225
BOST000001	Boston Terrier	PRJNA188158	SAMN21036241
BOXR000003	Boxer	PRJNA188158	SAMN21036275
BRBT000001	Barbet	PRJNA188158	SAMN21036210
BRBT000002	Barbet	PRJNA188158	SAMN21036211
BRIA000004	Briard	PRJNA188158	SAMN21036242
BRMD000003	Bernese Mountain Dog	PRJNA188158	SAMN21036248
BRMD000005	Bernese Mountain Dog	PRJNA188158	SAMN21036244
BRMD000006	Bernese Mountain Dog	PRJNA188158	SAMN21036245
BRMD000007	Bernese Mountain Dog	PRJNA188158	SAMN21036246
BRMD000008	Bernese Mountain Dog	PRJNA188158	SAMN21036247
BRMD000009	Bernese Mountain Dog	PRJNA188158	SAMN21036249
BRMD000010	Bernese Mountain Dog	PRJNA188158	SAMN21036243
BRTR000001	Black Russian Terrier	PRJNA188158	SAMN21036501
BS2962	Bernese Mountain Dog	PRJEB16012	SAMEA8157153
BS2963	Bernese Mountain Dog	PRJEB16012	SAMEA8157154
BS2964	Bernese Mountain Dog	PRJEB16012	SAMEA8157155
BS2965	Bernese Mountain Dog	PRJEB16012	SAMEA8157156
BS2966	Bernese Mountain Dog	PRJEB16012	SAMEA8157157
BS2967	Bernese Mountain Dog	PRJEB16012	SAMEA8157158
BS2968	Bernese Mountain Dog	PRJEB16012	SAMEA8157159
BS2969	Bernese Mountain Dog	PRJEB16012	SAMEA8157160
BS2970	Bernese Mountain Dog	PRJEB16012	SAMEA8157161
BS2971	Bernese Mountain Dog	PRJEB16012	SAMEA8157162
BT001	Miniature Bull Terrier	PRJEB16012	SAMEA6862958
BT002	Bull Terrier	PRJEB16012	SAMEA6862976
BT008	Miniature Bull Terrier	PRJEB16012	SAMEA6862959
BU034	Bullmastiff	PRJEB16012	SAMEA8157163
BULD000001	English Bulldog	PRJNA188158	SAMN21036289
BULM000003	Bullmastiff	PRJNA188158	SAMN21036251
BULM000004	Bullmastiff	PRJNA188158	SAMN21036252
BULT000002	Bull Terrier	PRJNA188158	SAMN21036250
CAIR000002	Cairn Terrier	PRJNA188158	SAMN21036262
CAIR000003	Cairn Terrier	PRJNA188158	SAMN21036263
CCRT000001	Curly Coated Retriever	PRJNA188158	SAMN21036269
CCRT000002	Curly Coated Retriever	PRJNA188158	SAMN21036270
CFA074	American Bulldog	PRJEB16012	SAMEA10644715
CFA150	Welsh Corgi (Cardigan)	PRJEB16012	SAMEA10644716
CFA155	Griffon d'arret Korthals	PRJEB16012	SAMEA10644717
CH019	Chihuahua (without pedigree)	PRJEB13139	SAMEA3905753
CH027	Chihuahua	PRJEB16012	SAMEA4848714
CH032	Chihuahua	PRJEB16012	SAMEA8797073
CH044	Chihuahua	PRJEB16012	SAMEA10644718
CHBR000003	Chesapeake Bay Retriever	PRJNA188158	SAMN21036259
CHBR000004	Chesapeake Bay Retriever	PRJNA188158	SAMN21036260
CHIH000005	Chihuahua	PRJNA188158	SAMN21036264
CI009	Cane Corso Italiano	PRJEB16012	SAMEA8157164
CK163	Cavalier King Charles Spaniel	PRJEB16012	SAMEA10644719
CKCS000003	Cavalier King Charles Spaniel	PRJNA188158	SAMN21036266
CNCS000002	Cane Corso Italiano	PRJNA188158	SAMN21036265
CNTI000001	Continental Bulldog	PRJNA188158	SAMN21036412
CNTI000002	Continental Bulldog	PRJNA188158	SAMN21036413
CNTI000003	Continental Bulldog	PRJNA188158	SAMN21036414
CNTI000004	Continental Bulldog	PRJNA188158	SAMN21036415
CNTI000005	Continental Bulldog	PRJNA188158	SAMN21036416
CNTI000006	Continental Bulldog	PRJNA188158	SAMN21036417
COLL000004	Collie	PRJNA188158	SAMN21036267
COTO000003	Coton de Tulear	PRJNA188158	SAMN21036268
CRES000001	Chinese Crested Dog	PRJNA188158	SAMN21036261
CZEC000001	Czechoslovakian Wolfdog	PRJNA188158	SAMN21036513
CZEC000002	Czechoslovakian Wolfdog	PRJNA188158	SAMN21036514
DALM000003	Dalmatian	PRJNA188158	SAMN21036274
DB149	Boxer	PRJEB16012	SAMEA8157165
DD304	Great Dane	PRJEB16012	SAMEA8157166
DD319	Great Dane	PRJEB16012	SAMEA10644720
DEER000001	Scottish Deerhound	PRJNA188158	SAMN21036456
DEER000002	Scottish Deerhound	PRJNA188158	SAMN21036457
DG0003	Dogo Argentino	PRJEB16012	SAMEA8157167
DH159	Dachshund	PRJEB16012	SAMEA8157168
DOBP000001	Doberman Pinscher	PRJNA188158	SAMN21036281
DOBP000002	Doberman Pinscher	PRJNA188158	SAMN21036276
DOBP000003	Doberman Pinscher	PRJNA188158	SAMN21036277
DOBP000004	Doberman Pinscher	PRJNA188158	SAMN21036278
DOBP000005	Doberman Pinscher	PRJNA188158	SAMN21036279
DOBP000006	Doberman Pinscher	PRJNA188158	SAMN21036280
DOBP000007	Doberman Pinscher	PRJNA188158	SAMN21036282
DP208	German Pinscher	PRJEB16012	SAMEA8157169
DS064	German Shepherd	PRJEB16012	SAMEA104283465
DS077	German Shepherd	PRJEB16012	SAMEA5657392
DS102	German Shepherd	PRJEB16012	SAMEA8157170
DSHP000001	Dutch Shepherd	PRJNA188158	SAMN21036332
DSHP000002	Dutch Shepherd	PRJNA188158	SAMN21036333
ELOD000001	Elo	PRJNA188158	SAMN21036290
ELOD000002	Elo	PRJNA188158	SAMN21036291
ELOD000003	Elo	PRJNA188158	SAMN21036292
ELOD000004	Elo	PRJNA188158	SAMN21036293
ELOD000005	Elo	PRJNA188158	SAMN21036294
ENTB000004	Entlebucher Mountain Dog	PRJNA188158	SAMN21036298
ENTB000005	Entlebucher Mountain Dog	PRJNA188158	SAMN21036299
ENTB000006	Entlebucher Mountain Dog	PRJNA188158	SAMN21036300
ENTB000007	Entlebucher Mountain Dog	PRJNA188158	SAMN21036295
ENTB000008	Entlebucher Mountain Dog	PRJNA188158	SAMN21036296
ENTB000009	Entlebucher Mountain Dog	PRJNA188158	SAMN21036297
ESET000004	English Setter	PRJNA188158	SAMN21036302
ESSP000003	English Springer Spaniel	PRJNA188158	SAMN21036301
EU037	Eurasier	PRJEB16012	SAMEA8157171
EURA000002	Eurasier	PRJNA188158	SAMN21036303
EURA000003	Eurasier	PRJNA188158	SAMN21036304
FAM005423	Kuvasz	PRJNA188158	SAMN23424288
FAM005424	Manchester Terrier	PRJNA188158	SAMN23802765
FAM005602	Leonberger	PRJNA188158	SAMN21036535
FAM005603	Leonberger	PRJNA188158	SAMN21036536
FB081	French Bulldog	PRJEB16012	SAMEA6249479
FB100	French Bulldog	PRJEB16012	SAMEA6862974
FB149	French Bulldog	PRJEB16012	SAMEA8157172
FB150	French Bulldog	PRJEB16012	SAMEA8157173
FBUL000004	French Bulldog	PRJNA188158	SAMN21036305
FX002	Foxterrier	PRJEB16012	SAMEA6862971
FX003	Foxterrier	PRJEB16012	SAMEA6862972
FX004	Foxterrier	PRJEB16012	SAMEA6862973
FXTE000001	Foxterrier	PRJNA188158	SAMN21036306
GBGV000004	Grand Basset Griffon Vendeen	PRJNA188158	SAMN21036307
GHND000001	German Hound	PRJNA188158	SAMN21036227
GHND000002	German Hound	PRJNA188158	SAMN21036228
GHND000003	German Hound	PRJNA188158	SAMN21036229
GHND000004	German Hound	PRJNA188158	SAMN21036230
GHND000005	German Hound	PRJNA188158	SAMN21036231
GHND000006	German Hound	PRJNA188158	SAMN21036232
GHUT000001	German Hunting Terrier	PRJNA188158	SAMN21036348
GHUT000002	German Hunting Terrier	PRJNA188158	SAMN21036349
GMSP000001	Deutscher Wachtelhund	PRJNA188158	SAMN21036285
GMSP000002	Deutscher Wachtelhund	PRJNA188158	SAMN21036286
GMSP000003	Deutscher Wachtelhund	PRJNA188158	SAMN21036287
GMSP000004	Deutscher Wachtelhund	PRJNA188158	SAMN21036288
GOLD000002	Golden Retriever	PRJNA188158	SAMN21036313
GOLD000003	Golden Retriever	PRJNA188158	SAMN21036314
GOLD000004	Golden Retriever	PRJNA188158	SAMN21036315
GOLD000005	Golden Retriever	PRJNA188158	SAMN21036316
GOLD000007	Golden Retriever	PRJNA188158	SAMN21036318
GPIN000001	German Pinscher	PRJNA188158	SAMN21036283
GPIN000002	German Pinscher	PRJNA188158	SAMN21036284
GPYR000001	Pyrenian Mountain Dog	PRJNA188158	SAMN21036422
GPYR000002	Pyrenian Mountain Dog	PRJNA188158	SAMN21036423
GR1379	Golden Retriever	PRJEB16012	SAMEA8797074
GR1480	Golden Retriever	PRJEB16012	SAMEA8157174
GREE000001	Greenland Dog	PRJNA188158	SAMN21036308
GREE000002	Greenland Dog	PRJNA188158	SAMN21036309
GREE000003	Greenland Dog	PRJNA188158	SAMN21036310
GRND000001	Belgian Shepherd (Groenendael)	PRJNA188158	SAMN21036373
GSMD000002	Great Swiss Mountain Dog	PRJNA188158	SAMN21036459
GSMD000003	Great Swiss Mountain Dog	PRJNA188158	SAMN21036460
GSMD000005	Great Swiss Mountain Dog	PRJNA188158	SAMN21036461
GSMD000006	Great Swiss Mountain Dog	PRJNA188158	SAMN21036462
GSMD000007	Great Swiss Mountain Dog	PRJNA188158	SAMN21036463
GSMD000008	Great Swiss Mountain Dog	PRJNA188158	SAMN21036464
GSMD000009	Great Swiss Mountain Dog	PRJNA188158	SAMN21036465
GSMD000010	Great Swiss Mountain Dog	PRJNA188158	SAMN21036466
GSNZ000003	Giant Schnauzer	PRJNA188158	SAMN21036443
GSPK000001	Miniature Spitz	PRJNA188158	SAMN21036362
GSPK000002	Miniature Spitz	PRJNA188158	SAMN21036363
GSPK000003	Miniature Spitz	PRJNA188158	SAMN21036364
GSPK000007	German Spitz (Miniature Spitz)	PRJNA188158	SAMN21036357
GSPK000008	German Spitz (Miniature Spitz)	PRJNA188158	SAMN21036358
GSPK000009	German Spitz (Miniature Spitz)	PRJNA188158	SAMN21036359
GSPK000010	German Spitz (Miniature Spitz)	PRJNA188158	SAMN21036360
GSPK000011	German Spitz (Miniature Spitz)	PRJNA188158	SAMN21036361
GSPZ000001	German Spitz (Giant Spitz)	PRJNA188158	SAMN21036325
GSPZ000002	German Spitz (Giant Spitz)	PRJNA188158	SAMN21036328
GSPZ000003	German Spitz (Giant Spitz)	PRJNA188158	SAMN21036319
GSPZ000004	German Spitz (Giant Spitz)	PRJNA188158	SAMN21036320
GSPZ000005	German Spitz (Giant Spitz)	PRJNA188158	SAMN21036321
GSPZ000006	German Spitz (Giant Spitz)	PRJNA188158	SAMN21036322
GSZG000001	German Spitz (Giant Spitz)	PRJNA188158	SAMN21036323
GSZG000002	German Spitz (Giant Spitz)	PRJNA188158	SAMN21036324
GSZG000003	German Spitz (Giant Spitz)	PRJNA188158	SAMN21036326
GSZG000004	German Spitz (Giant Spitz)	PRJNA188158	SAMN21036327
GSZG000005	German Spitz (Giant Spitz)	PRJNA188158	SAMN21036329
GSZG000006	German Spitz (Giant Spitz)	PRJNA188158	SAMN21036330
GSZG000007	German Spitz (Miniature Spitz)	PRJNA188158	SAMN21036356
GSZM000001	Medium Size Spitz	PRJNA188158	SAMN21036384
GSZM000002	Medium Size Spitz	PRJNA188158	SAMN21036385
GSZM000003	Medium Size Spitz	PRJNA188158	SAMN21036386
GSZM000004	Medium Size Spitz	PRJNA188158	SAMN21036387
GSZM000007	German Spitz (Medium Size Spitz)	PRJNA188158	SAMN21036389
GSZM000008	German Spitz (Medium Size Spitz)	PRJNA188158	SAMN21036390
GSZM000009	German Spitz (Medium Size Spitz)	PRJNA188158	SAMN21036391
GSZM000010	German Spitz (Medium Size Spitz)	PRJNA188158	SAMN21036392
GSZM000011	German Spitz (Medium Size Spitz)	PRJNA188158	SAMN21036393
GSZM000012	German Spitz (Medium Size Spitz)	PRJNA188158	SAMN21036388
GW004	German Wirehaired Pointer	PRJEB13468	SAMEA3928144
GW005	German Wirehaired Pointer	PRJEB16012	SAMEA6862962
GW026	German Wirehaired Pointer	PRJEB16012	SAMEA6862963
GW028	German Wirehaired Pointer	PRJEB16012	SAMEA6862964
GW029	German Wirehaired Pointer	PRJEB16012	SAMEA6862965
GW030	German Wirehaired Pointer	PRJEB16012	SAMEA6862966
GW041	German Wirehaired Pointer	PRJEB16012	SAMEA6862967
GW043	German Wirehaired Pointer	PRJEB16012	SAMEA6862977
GW045	German Wirehaired Pointer	PRJEB16012	SAMEA6862968
GW046	German Wirehaired Pointer	PRJEB16012	SAMEA6862969
GW048	German Wirehaired Pointer	PRJEB16012	SAMEA6862970
GWHP000003	German Wirehaired Pointer	PRJNA188158	SAMN21036331
GY453	Greyhound	PRJEB16012	SAMEA8157175
HO013	Dutch Shepherd	PRJEB16012	SAMEA6862981
HOVA000001	Hovawart	PRJNA188158	SAMN21036335
HOVA000002	Hovawart	PRJNA188158	SAMN21036336
HVSC000001	Hanoverian Hound	PRJNA188158	SAMN21036334
IH0001	Irish Wolfhound	PRJEB16012	SAMEA7198607
IRIT000002	Irish Terrier	PRJNA188158	SAMN21036338
IRSE000002	Irish Red Setter	PRJNA188158	SAMN21036337
IW015	Italian Greyhound	PRJEB16012	SAMEA8157176
JSPZ000001	Japanese Spitz	PRJNA188158	SAMN21036340
JSPZ000002	Japanese Spitz	PRJNA188158	SAMN21036344
JSPZ000003	Japanese Spitz	PRJNA188158	SAMN21036346
JSPZ000007	Japanese Spitz	PRJNA188158	SAMN21036339
JSPZ000008	Japanese Spitz	PRJNA188158	SAMN21036341
JSPZ000009	Japanese Spitz	PRJNA188158	SAMN21036342
JSPZ000010	Japanese Spitz	PRJNA188158	SAMN21036343
JSPZ000011	Japanese Spitz	PRJNA188158	SAMN21036345
JSPZ000012	Japanese Spitz	PRJNA188158	SAMN21036347
KB0003	Kerry Blue Terrier	PRJEB16012	SAMEA8157177
KEES000003	Keeshond	PRJNA188158	SAMN21036519
KEES000004	Keeshond	PRJNA188158	SAMN21036520
KEES000007	Keeshond	PRJNA188158	SAMN21036518
KEES000008	Keeshond	PRJNA188158	SAMN21036521
KEES000009	Keeshond	PRJNA188158	SAMN21036522
KEES000010	Keeshond	PRJNA188158	SAMN21036523
KEES000011	Keeshond	PRJNA188158	SAMN21036524
KEES000012	Keeshond	PRJNA188158	SAMN21036525
KERY000001	Kerry Blue Terrier	PRJNA188158	SAMN21036350
KMUM000003	Kleiner Münsterländer	PRJNA188158	SAMN21036354
KMUM000004	Kleiner Münsterländer	PRJNA188158	SAMN21036355
KROM000001	Kromfohrländer	PRJNA188158	SAMN21036351
KROM000002	Kromfohrländer	PRJNA188158	SAMN21036352
KROM000003	Kromfohrländer	PRJNA188158	SAMN21036353
LA3186	Labrador Retriever	PRJEB16012	SAMEA8157178
LA3197	Labrador Retriever	PRJEB16012	SAMEA10644721
LA3222	Labrador Retriever	PRJEB16012	SAMEA8157179
LA3260	Labrador Retriever	PRJEB16012	SAMEA10644722
LA3305	Labrador Retriever	PRJEB16012	SAMEA10644723
LABR000001	Labrador Retriever	PRJNA188158	SAMN21036365
LABR000002	Labrador Retriever	PRJNA188158	SAMN21036366
LABR000003	Labrador Retriever	PRJNA188158	SAMN21036367
LABR000004	Labrador Retriever	PRJNA188158	SAMN21036368
LABR000005	Labrador Retriever	PRJNA188158	SAMN21036369
LABR000006	Labrador Retriever	PRJNA188158	SAMN21036370
LAEK000002	Belgian Shepherd (Malinois)	PRJNA188158	SAMN21036375
LAEK000003	Belgian Shepherd (Laekenois)	PRJNA188158	SAMN21036376
LB0013	Leonberger	PRJEB16012	SAMEA4848665
LB0139	Leonberger	PRJEB16012	SAMEA4848666
LB0147	Leonberger	PRJEB16012	SAMEA4848690
LB0197	Leonberger	PRJEB16012	SAMEA4848676
LB0268	Leonberger	PRJEB16012	SAMEA4848668
LB0304	Leonberger	PRJEB16012	SAMEA4848669
LB0305	Leonberger	PRJEB16012	SAMEA4848670
LB0339	Leonberger	PRJEB16012	SAMEA4848671
LB0453	Leonberger	PRJEB16012	SAMEA8797091
LB0482	Leonberger	PRJEB16012	SAMEA4848673
LB0507	Leonberger	PRJEB16012	SAMEA4848691
LB0554	Leonberger	PRJEB16012	SAMEA4848692
LB0656	Leonberger	PRJEB16012	SAMEA4848693
LB0683	Leonberger	PRJEB16012	SAMEA4848674
LB0908	Leonberger	PRJEB16012	SAMEA8797095
LB1000	Leonberger	PRJEB16012	SAMEA8797087
LB1428	Leonberger	PRJEB16012	SAMEA8797088
LB1429	Leonberger	PRJEB16012	SAMEA8797090
LB1848	Leonberger	PRJEB16012	SAMEA104656180
LB1961	Leonberger	PRJEB16012	SAMEA4848675
LB214	Leonberger	PRJEB16012	SAMEA4867936
LB3506	Leonberger	PRJEB16012	SAMEA4848684
LB3521	Leonberger	PRJEB16012	SAMEA4848694
LB3586	Leonberger	PRJEB16012	SAMEA8797096
LB3906	Leonberger	PRJEB16012	SAMEA4848688
LB4114	Leonberger	PRJEB16012	SAMEA7297166
LB4508	Leonberger	PRJEB16012	SAMEA7297167
LB4517	Leonberger	PRJEB16012	SAMEA8797094
LB4532	Leonberger	PRJEB16012	SAMEA8797092
LB4693	Leonberger	PRJEB16012	SAMEA4848695
LB4723	Leonberger	PRJEB16012	SAMEA10644724
LB4909	Leonberger	PRJEB16012	SAMEA10644725
LB5378	Leonberger	PRJEB16012	SAMEA4873254
LB5751	Leonberger	PRJEB16012	SAMEA4848699
LB6011	Leonberger	PRJEB16012	SAMEA10644726
LB6113	Leonberger	PRJEB16012	SAMEA8797089
LB6208	Leonberger	PRJEB16012	SAMEA8797093
LB6285	Leonberger	PRJEB16012	SAMEA7198610
LB6341	Leonberger	PRJEB16012	SAMEA7297169
LB6466	Leonberger	PRJEB16012	SAMEA10644727
LB6480	Leonberger	PRJEB16012	SAMEA10644728
LB6485	Leonberger	PRJEB16012	SAMEA10644729
LB6508	Leonberger	PRJEB16012	SAMEA10644730
LB6543	Leonberger	PRJEB16012	SAMEA10644731
LB6546	Leonberger	PRJEB16012	SAMEA10644732
LB6665	Leonberger	PRJEB16012	SAMEA10644733
LC003	Cão de Castro Laboreiro	PRJEB16012	SAMEA8797075
LDSR000001	Landseer	PRJNA188158	SAMN21036371
LDSR000002	Landseer	PRJNA188158	SAMN21036372
LE0048	Leonberger	PRJEB16012	SAMEA8230809
LE0051	Leonberger	PRJEB16012	SAMEA4848677
LE0096	Leonberger	PRJEB16012	SAMEA8230810
LE0116	Leonberger	PRJEB16012	SAMEA8230811
LE0269	Leonberger	PRJEB16012	SAMEA4848679
LE0512	Leonberger	PRJEB16012	SAMEA4848680
LE0734	Leonberger	PRJEB16012	SAMEA8230814
LE0738	Leonberger	PRJEB16012	SAMEA4848681
LE0812	Leonberger	PRJEB16012	SAMEA8230815
LE0823	Leonberger	PRJEB16012	SAMEA8230816
LE0896	Leonberger	PRJEB16012	SAMEA4848696
LE114725	Leonberger	PRJEB16012	SAMEA8230817
LE1160	Leonberger	PRJEB16012	SAMEA8230818
LE1294	Leonberger	PRJEB16012	SAMEA4848682
LE1301	Leonberger	PRJEB16012	SAMEA4848683
LE1306	Leonberger	PRJEB16012	SAMEA8230819
LE1355	Leonberger	PRJEB16012	SAMEA4848698
LE2450	Leonberger	PRJEB16012	SAMEA104656181
LE2614	Leonberger	PRJEB16012	SAMEA8797085
LE2887	Leonberger	PRJEB16012	SAMEA8797086
LE3257	Leonberger	PRJEB16012	SAMEA10644734
LE3765	Leonberger	PRJEB16012	SAMEA10644735
LE3832	Leonberger	PRJEB16012	SAMEA10644736
LMUN000001	Grosser Münsterländer	PRJNA188158	SAMN21036312
LR1194	Lagotto Romagnolo	PRJEB16012	SAMEA8157180
LR1277	Lagotto Romagnolo	PRJEB16012	SAMEA8157181
LR1278	Lagotto Romagnolo	PRJEB16012	SAMEA6862954
LR1279	Lagotto Romagnolo	PRJEB16012	SAMEA8157182
LR1280	Lagotto Romagnolo	PRJEB16012	SAMEA8157183
LR1310	Lagotto Romagnolo	PRJEB16012	SAMEA6862975
LR460	Lagotto Romagnolo	PRJEB16012	SAMEA8157184
LR613	Lagotto Romagnolo	PRJEB16012	SAMEA8157185
MA437	Belgian Shepherd (Malinois)	PRJEB16012	SAMEA4848704
MA446	Belgian Shepherd (Malinois)	PRJEB16012	SAMEA6249499
MA509	Belgian Shepherd (Malinois)	PRJEB16012	SAMEA7198602
MA546	Belgian Shepherd (Malinois)	PRJEB16012	SAMEA8157186
MA563	Belgian Shepherd (Malinois)	PRJEB16012	SAMEA8157187
MALT000002	Maltese	PRJNA188158	SAMN21036233
MALT000003	Maltese	PRJNA188158	SAMN21036234
MARM000001	Maremma Sheepdog	PRJNA188158	SAMN21036381
MARM000002	Maremma Sheepdog	PRJNA188158	SAMN21036382
MARM000003	Maremma Sheepdog	PRJNA188158	SAMN21036383
MBLT000002	Miniature Bull Terrier	PRJNA188158	SAMN21036378
MBLT000003	Miniature Bull Terrier	PRJNA188158	SAMN21036379
MBLT000004	Miniature Bull Terrier	PRJNA188158	SAMN21036380
MI034	Mixed Breed (German Shepherd x Malinois)	PRJEB16012	SAMEA6862986
MI035	Mixed Breed	PRJEB16012	SAMEA8797077
MI038	Mixed Breed (Border Collie x Labrador)	PRJEB16012	SAMEA8797078
MI041	Mixed breed	PRJEB16012	SAMEA10833662
MI045	Mixed Breed	PRJEB16012	SAMEA10833663
MI048	Mixed breed	PRJEB16012	SAMEA10833664
MPIN000002	Miniature Pinscher	PRJNA188158	SAMN21036440
MPIN000003	Miniature Pinscher	PRJNA188158	SAMN21036441
MPOO000001	Poodle (Miniature Poodle)	PRJNA188158	SAMN21036430
MSNZ000002	Miniature Schnauzer	PRJNA188158	SAMN21036534
MUDI000003	Mudi	PRJNA188158	SAMN21036394
MUDI000004	Mudi	PRJNA188158	SAMN21036395
NEWF000003	Newfoundland	PRJNA188158	SAMN21036402
NEWF000004	Newfoundland	PRJNA188158	SAMN21036403
NORF000003	Norfolk Terrier	PRJNA188158	SAMN21036404
NORF000004	Norfolk Terrier	PRJNA188158	SAMN21036405
NORF000005	Norfolk Terrier	PRJNA188158	SAMN21036406
NOWT000003	Norwich Terrier	PRJNA188158	SAMN21036410
NOWT000004	Norwich Terrier	PRJNA188158	SAMN21036411
NR374	Nova Scotia Duck Tolling Retriever	PRJEB16012	SAMEA10644737	Affected by CDMC
OLES000004	Old English Sheepdog	PRJNA188158	SAMN21036418
OLES000005	Old English Sheepdog	PRJNA188158	SAMN21036419
OLGS000001	Old German Shepherd	PRJNA188158	SAMN21036185
OLGS000002	Old German Shepherd	PRJNA188158	SAMN21036186
OLGS000003	Old German Shepherd	PRJNA188158	SAMN21036187
OLGS000004	Old German Shepherd	PRJNA188158	SAMN21036188
OLGS000005	Old German Shepherd	PRJNA188158	SAMN21036190
OLGS000006	Old German Shepherd	PRJNA188158	SAMN21036189
PAPI000003	Papillon	PRJNA188158	SAMN21036420
PAPI000004	Papillon	PRJNA188158	SAMN21036421
PARS000002	Parson Russell Terrier	PRJNA188158	SAMN21036433
PARS000003	Parson Russell Terrier	PRJNA188158	SAMN21036434
PATR000001	Patterdale Terrier	PRJNA188158	SAMN21036435
PBGA000001	Petit Bleu de Gascogne	PRJNA188158	SAMN21036311
PBGV000010	Petit Basset Griffon Vendeen	PRJNA188158	SAMN21036425
PERH000001	Peruvian Hairless	PRJNA188158	SAMN21036426
PERH000002	Peruvian Hairless	PRJNA188158	SAMN21036427
PERH000003	Peruvian Hairless	PRJNA188158	SAMN21036428
POLS000001	Polski Owczarek Nizinny	PRJNA188158	SAMN21036431
POLS000002	Polski Owczarek Nizinny	PRJNA188158	SAMN21036432
POMR000003	Pomeranian	PRJNA188158	SAMN21036528
POMR000004	Pomeranian	PRJNA188158	SAMN21036529
POMR000005	Pomeranian	PRJNA188158	SAMN21036530
POMR000006	Pomeranian	PRJNA188158	SAMN21036531
POMR000007	Pomeranian	PRJNA188158	SAMN21036532
POMR000008	Pomeranian	PRJNA188158	SAMN21036533
POSD000001	Cão da Serra de Aires	PRJNA188158	SAMN21036271
POSD000002	Cão da Serra de Aires	PRJNA188158	SAMN21036272
POSD000003	Cão da Serra de Aires	PRJNA188158	SAMN21036273
PTWD000004	Portuguese Water Dog	PRJNA188158	SAMN21036437
PTWD000005	Portuguese Water Dog	PRJNA188158	SAMN21036438
PTWD000006	Portuguese Water Dog	PRJNA188158	SAMN21036439
PULI000001	Puli	PRJNA188158	SAMN21036436
PYSH000001	Pyrenean Shepherd	PRJNA188158	SAMN21036253
PYSH000002	Pyrenean Shepherd	PRJNA188158	SAMN21036254
RHOD000002	Rhodesian Ridgeback	PRJNA188158	SAMN21036442
RR375	Rhodesian Ridgeback	PRJEB16012	SAMEA10644738
RTOY000001	Russian Toy Dog	PRJNA188158	SAMN21036444
RTOY000002	Russian Toy Dog	PRJNA188158	SAMN21036445
SAAR000001	Saarlooswolfhund	PRJNA188158	SAMN21036499
SAMO000004	Samojede	PRJNA188158	SAMN21036446
SC001	Scottish Terrier	PRJEB16012	SAMEA6862960
SC022	Scottish Terrier	PRJEB16012	SAMEA6862961
SCPD000001	Schapendoes	PRJNA188158	SAMN21036408
SCPD000002	Schapendoes	PRJNA188158	SAMN21036409
SHIB000002	Shiba Inu	PRJNA188158	SAMN21036467
SHIH000002	Shih Tzu	PRJNA188158	SAMN21036506
SHIH000003	Shih Tzu	PRJNA188158	SAMN21036507
SKIP000003	Schipperke	PRJNA188158	SAMN21036468
SKIP000004	Schipperke	PRJNA188158	SAMN21036469
SLOU000002	Sloughi	PRJNA188158	SAMN21036458
SLWP000001	Wire Haired Slovakian Pointer	PRJNA188158	SAMN21036502
SLWP000002	Wire Haired Slovakian Pointer	PRJNA188158	SAMN21036504
SLWP000003	Wire Haired Slovakian Pointer	PRJNA188158	SAMN21036503
SLWP000004	Wire Haired Slovakian Pointer	PRJNA188158	SAMN21036505
SMSH000001	Small Swiss Hound	PRJNA188158	SAMN21036487
SMSH000002	Small Swiss Hound	PRJNA188158	SAMN21036488
SMSH000003	Small Swiss Hound	PRJNA188158	SAMN21036490
SMSH000004	Small Swiss Hound	PRJNA188158	SAMN21036491
SMSH000005	Small Swiss Hound	PRJNA188158	SAMN21036493
SMSH000006	Small Swiss Hound	PRJNA188158	SAMN21036494
SMSH000007	Small Swiss Hound	PRJNA188158	SAMN21036483
SMSH000008	Small Swiss Hound	PRJNA188158	SAMN21036484
SMSH000009	Small Swiss Hound	PRJNA188158	SAMN21036485
SMSH000010	Small Swiss Hound	PRJNA188158	SAMN21036486
SMSH000011	Small Swiss Hound	PRJNA188158	SAMN21036489
SMSH000012	Small Swiss Hound	PRJNA188158	SAMN21036492
SP018	Shar Pei	PRJEB16012	SAMEA7198604
SP019	Shar Pei	PRJEB16012	SAMEA7198605
SP020	Shar Pei	PRJEB16012	SAMEA7198612
SPEI000001	Shar Pei	PRJNA188158	SAMN21036496
SPEI000002	Shar Pei	PRJNA188158	SAMN21036497
SPEI000003	Shar Pei	PRJNA188158	SAMN21036498
SPWD000001	Spanish Waterdog	PRJNA188158	SAMN21036424
SR262	Saarlooswolfhund	PRJEB16012	SAMEA8157188
SROV000001	South Russian Ovcharka	PRJNA188158	SAMN21036495
SS109	Shetland Sheepdog	PRJEB16012	SAMEA8797076
SSHP000003	Shetland Sheepdog	PRJNA188158	SAMN21036500
SSNZ000001	Standard Schnauzer	PRJNA188158	SAMN21036482
STBD000004	St. Bernard	PRJNA188158	SAMN21036448
STBD000005	St. Bernard	PRJNA188158	SAMN21036454
STBD000006	St. Bernard	PRJNA188158	SAMN21036455
STBD000008	Saint Bernard	PRJNA188158	SAMN21036447
STBD000009	Saint Bernard	PRJNA188158	SAMN21036449
STBD000010	Saint Bernard	PRJNA188158	SAMN21036450
STBD000011	Saint Bernard	PRJNA188158	SAMN21036451
STBD000012	Saint Bernard	PRJNA188158	SAMN21036452
STBD000013	Saint Bernard	PRJNA188158	SAMN21036453
SWHN000001	Swiss Hound	PRJNA188158	SAMN21036470
SWHN000002	Swiss Hound	PRJNA188158	SAMN21036471
SWHN000003	Swiss Hound	PRJNA188158	SAMN21036472
SWHN000004	Swiss Hound	PRJNA188158	SAMN21036473
SWHN000005	Swiss Hound	PRJNA188158	SAMN21036474
SWHN000006	Swiss Hound	PRJNA188158	SAMN21036475
SWHN000007	Swiss Hound	PRJNA188158	SAMN21036476
SWHN000008	Swiss Hound	PRJNA188158	SAMN21036477
SWHN000009	Swiss Hound	PRJNA188158	SAMN21036478
SWHN000010	Swiss Hound	PRJNA188158	SAMN21036479
SWHN000011	Swiss Hound	PRJNA188158	SAMN21036480
SWHN000012	Swiss Hound	PRJNA188158	SAMN21036481
SY061	Husky	PRJEB16012	SAMEA10644739
TA006	Airedale Terrier	PRJEB16012	SAMEA6862951
TERV000003	Belgian Shepherd (Tervueren)	PRJNA188158	SAMN21036374
THAI000001	Thai Ridgeback	PRJNA188158	SAMN21036509
THAI000002	Thai Ridgeback	PRJNA188158	SAMN21036510
THAI000003	Thai Ridgeback	PRJNA188158	SAMN21036511
TIBT000001	Tibetan Terrier	PRJNA188158	SAMN21036512
TM001	Tamaskan	PRJEB16012	SAMEA6862952
TMSK000001	Tamaskan	PRJNA188158	SAMN21036508
TPOO000001	Poodle (Toy Poodle)	PRJNA188158	SAMN21036429
TS0001	Sealyham Terrier	PRJEB16012	SAMEA7198611
VIZS000003	Hungarian Short-Haired Pointer (Vizsla)	PRJNA188158	SAMN21036396
VIZS000004	Hungarian Short-Haired Pointer (Vizsla)	PRJNA188158	SAMN21036397
VIZS000005	Hungarian Short-Haired Pointer (Vizsla)	PRJNA188158	SAMN21036398
WE008	Weimaraner	PRJEB16012	SAMEA104283466
WE012	Weimaraner	PRJEB16012	SAMEA6862955
WE015	Weimaraner	PRJEB16012	SAMEA6862956
WEIM000003	Weimaraner	PRJNA188158	SAMN21036515
WEIM000004	Weimaraner	PRJNA188158	SAMN21036516
WELT000004	Welsh Terrier	PRJNA188158	SAMN21036526
WH118	Whippet	PRJEB16012	SAMEA5657394
WH129	Whippet	PRJEB16012	SAMEA7198608
WHIP000003	Whippet	PRJNA188158	SAMN21036517
WSSD000005	White Swiss Shepherd Dog	PRJNA188158	SAMN21036212
WSSD000006	White Swiss Shepherd Dog	PRJNA188158	SAMN21036216
WSSD000007	White Swiss Shepherd Dog	PRJNA188158	SAMN21036217
WSSD000008	White Swiss Shepherd Dog	PRJNA188158	SAMN21036218
WSSD000009	White Swiss Shepherd Dog	PRJNA188158	SAMN21036219
WSSD000010	White Swiss Shepherd Dog	PRJNA188158	SAMN21036220
WW706	West Highland White Terrier	PRJEB16012	SAMEA8157189
WW707	West Highland White Terrier	PRJEB16012	SAMEA8157190
WW708	West Highland White Terrier	PRJEB16012	SAMEA8157191
XOLO000003	Mexican Hairless	PRJNA188158	SAMN21036399
XOLO000004	Mexican Hairless	PRJNA188158	SAMN21036400
XOLO000005	Mexican Hairless	PRJNA188158	SAMN21036401
YORK000003	Yorkshire Terrier	PRJNA188158	SAMN21036527
ZS002	Pomeranian	PRJEB16012	SAMEA10644740
ZS013	Pomeranian	PRJEB16012	SAMEA10644741
ZS204	Pomeranian	PRJEB16012	SAMEA10644742
ZS205	Pomeranian	PRJEB16012	SAMEA10644743
ZS268	Pomeranian	PRJEB16012	SAMEA10644744
ZS551	Pomeranian	PRJEB16012	SAMEA10644745
ZS584	Pomeranian	PRJEB16012	SAMEA10644746
ZS613	Pomeranian	PRJEB16012	SAMEA10644747
ZS621	Pomeranian	PRJEB16012	SAMEA10644748
ZS623	Pomeranian	PRJEB16012	SAMEA7198603
ZS653	Pomeranian	PRJEB16012	SAMEA8157192
ZS657	Pomeranian	PRJEB16012	SAMEA10644749
ZS688	Pomeranian	PRJEB16012	SAMEA10644750
