# Supplementary material for: SLC25A12 Missense Variant in Nova Scotia Duck Tolling Retrievers Affected by Cerebellar Degeneration—Myositis Complex (CDMC)
Source: Genes (Basel). 2022 Jul 9;13(7):1223. doi: 10.3390/genes13071223 (PMC9319113; doi:10.3390/genes13071223)
Supplement: Supplementary file 1 [file genes-13-01223-s001.zip › Table_S2_Private_Variants.xlsx]

## Sheet: private homozygous variants
Table S2. Private homozygous variants in the genome of the affected Nova Scotia Duck Tolling Retriever. Variants were called with respect to the UU_Cfam_GSD_1.0 reference genome assembly. The functional annotation of the variants is based on the NCBI annotation release 106. The table is in "1 effect per line" format. Thus, one variant will be listed several times, if multiple effects, e.g. on dif…
#CHROM	POS	REF	ALT	FILTER	ALLELE	EFFECT	IMPACT	GENE	GENEID	FEATURE	FEATUREID	BIOTYPE	RANK	HGVS_C	HGVS_P
chr1	965821	C	T	PASS	T	intergenic_region	MODIFIER	LOC119870619-LOC111090558	LOC119870619-LOC111090558	intergenic_region	LOC119870619_3-LOC111090558_3		-1	n.965821C>T
chr1	2234676	C	T	PASS	T	intergenic_region	MODIFIER	LOC119870623-LOC111092046	LOC119870623-LOC111092046	intergenic_region	LOC119870623_3-LOC111092046_3		-1	n.2234676C>T
chr1	2470365	G	A	PASS	A	intergenic_region	MODIFIER	LOC119870625_2-LOC111092137	LOC119870625_2-LOC111092137	intergenic_region	LOC119870625_2-LOC111092137_3		-1	n.2470365G>A
chr1	3081064	C	T	PASS	T	intron_variant	MODIFIER	LOC119870510	LOC119870510	transcript	XR_005353305.1	pseudogene	1	n.52+2222G>A
chr1	3250928	C	G	PASS	G	upstream_gene_variant	MODIFIER	ZNF516	ZNF516	transcript	XM_038525748.1	protein_coding	-1	c.-571C>G
chr1	3250928	C	G	PASS	G	upstream_gene_variant	MODIFIER	ZNF516	ZNF516	transcript	XM_038525752.1	protein_coding	-1	c.-386C>G
chr1	3250928	C	G	PASS	G	upstream_gene_variant	MODIFIER	ZNF516	ZNF516	transcript	XM_038525753.1	protein_coding	-1	c.-674C>G
chr1	3250928	C	G	PASS	G	upstream_gene_variant	MODIFIER	ZNF516	ZNF516	transcript	XM_038525761.1	protein_coding	-1	c.-571C>G
chr1	3250928	C	G	PASS	G	upstream_gene_variant	MODIFIER	ZNF516	ZNF516	transcript	XM_038525760.1	protein_coding	-1	c.-571C>G
chr1	3250928	C	G	PASS	G	upstream_gene_variant	MODIFIER	ZNF516	ZNF516	transcript	XM_038525759.1	protein_coding	-1	c.-571C>G
chr1	3250928	C	G	PASS	G	upstream_gene_variant	MODIFIER	ZNF516	ZNF516	transcript	XM_038525758.1	protein_coding	-1	c.-1115C>G
chr1	3250928	C	G	PASS	G	upstream_gene_variant	MODIFIER	ZNF516	ZNF516	transcript	XM_038525757.1	protein_coding	-1	c.-1286C>G
chr1	3250928	C	G	PASS	G	intron_variant	MODIFIER	ZNF516	ZNF516	transcript	XM_038525749.1	protein_coding	1	c.-360+3460C>G
chr1	3250928	C	G	PASS	G	intron_variant	MODIFIER	ZNF516	ZNF516	transcript	XM_038525754.1	protein_coding	1	c.-175+3460C>G
chr1	3250928	C	G	PASS	G	intron_variant	MODIFIER	ZNF516	ZNF516	transcript	XM_038525755.1	protein_coding	1	c.-175+3043C>G
chr1	3250928	C	G	PASS	G	intron_variant	MODIFIER	ZNF516	ZNF516	transcript	XM_038525751.1	protein_coding	1	c.-360+3043C>G
chr1	3250928	C	G	PASS	G	intron_variant	MODIFIER	ZNF516	ZNF516	transcript	XM_038525756.1	protein_coding	1	c.-175+455C>G
chr1	3250928	C	G	PASS	G	intron_variant	MODIFIER	ZNF516	ZNF516	transcript	XM_038525750.1	protein_coding	1	c.-360+455C>G
chr1	3808612	A	T	PASS	T	intergenic_region	MODIFIER	LOC102157008-LOC111092546	LOC102157008-LOC111092546	intergenic_region	LOC102157008_3-LOC111092546_3		-1	n.3808612A>T
chr1	3937942	G	A	PASS	A	intergenic_region	MODIFIER	LOC102157008-LOC111092546	LOC102157008-LOC111092546	intergenic_region	LOC102157008_3-LOC111092546_3		-1	n.3937942G>A
chr1	7637023	G	A	PASS	A	intergenic_region	MODIFIER	LOC100685067-LOC111090580	LOC100685067-LOC111090580	intergenic_region	LOC100685067_3-LOC111090580_3		-1	n.7637023G>A
chr1	8179696	T	C	PASS	C	intergenic_region	MODIFIER	SOCS6-LOC100683962	SOCS6-LOC100683962	intergenic_region	SOCS6_3-LOC100683962_3		-1	n.8179696T>C
chr1	8466156	G	C	PASS	C	downstream_gene_variant	MODIFIER	DOK6	DOK6	transcript	XM_038525819.1	protein_coding	-1	c.*9523C>G
chr1	8466156	G	C	PASS	C	non_coding_transcript_exon_variant	MODIFIER	LOC119870700	LOC119870700	transcript	XR_005353348.1	pseudogene	1	n.66G>C
chr1	10869738	C	T	PASS	T	intron_variant	MODIFIER	LOC119870629	LOC119870629	transcript	XR_005353015.1	pseudogene	1	n.190-46987G>A
chr1	12597483	T	TATCTGAAGGCAAAAAAAAAAAAAAAAAAAAAAAAAAAAAAAAAAAAAAAAAAAAAAAAA	PASS	TATCTGAAGGCAAAAAAAAAAAAAAAAAAAAAAAAAAAAAAAAAAAAAAAAAAAAAAAAA	intergenic_region	MODIFIER	CDH7-LOC119870704	CDH7-LOC119870704	intergenic_region	CDH7_3-LOC119870704_3		-1	n.12597483_12597484insATCTGAAGGCAAAAAAAAAAAAAAAAAAAAAAAAAAAAAAAAAAAAAAAAAAAAAAAAA
chr1	19232231	GAAA	G	PASS	G	upstream_gene_variant	MODIFIER	LOC612779	LOC612779	transcript	XM_038525936.1	protein_coding	-1	c.-1299_-1297delAAA
chr1	19232231	GAAA	G	PASS	G	intron_variant	MODIFIER	WDR7	WDR7	transcript	XM_038525930.1	protein_coding	6	c.373-1756_373-1754delTTT
chr1	19232231	GAAA	G	PASS	G	intron_variant	MODIFIER	WDR7	WDR7	transcript	XM_038525931.1	protein_coding	5	c.373-1756_373-1754delTTT
chr1	19232231	GAAA	G	PASS	G	intron_variant	MODIFIER	WDR7	WDR7	transcript	XM_038525933.1	protein_coding	6	c.373-1756_373-1754delTTT
chr1	19232231	GAAA	G	PASS	G	intron_variant	MODIFIER	WDR7	WDR7	transcript	XM_038525932.1	protein_coding	5	c.346-1756_346-1754delTTT
chr1	19232231	GAAA	G	PASS	G	intron_variant	MODIFIER	WDR7	WDR7	transcript	XM_038525934.1	protein_coding	6	c.373-1756_373-1754delTTT
chr1	19232231	GAAA	G	PASS	G	intron_variant	MODIFIER	WDR7	WDR7	transcript	XM_038525935.1	protein_coding	6	c.373-1756_373-1754delTTT
chr1	19232238	G	A	PASS	A	upstream_gene_variant	MODIFIER	LOC612779	LOC612779	transcript	XM_038525936.1	protein_coding	-1	c.-1293G>A
chr1	19232238	G	A	PASS	A	intron_variant	MODIFIER	WDR7	WDR7	transcript	XM_038525930.1	protein_coding	6	c.373-1760C>T
chr1	19232238	G	A	PASS	A	intron_variant	MODIFIER	WDR7	WDR7	transcript	XM_038525931.1	protein_coding	5	c.373-1760C>T
chr1	19232238	G	A	PASS	A	intron_variant	MODIFIER	WDR7	WDR7	transcript	XM_038525933.1	protein_coding	6	c.373-1760C>T
chr1	19232238	G	A	PASS	A	intron_variant	MODIFIER	WDR7	WDR7	transcript	XM_038525932.1	protein_coding	5	c.346-1760C>T
chr1	19232238	G	A	PASS	A	intron_variant	MODIFIER	WDR7	WDR7	transcript	XM_038525934.1	protein_coding	6	c.373-1760C>T
chr1	19232238	G	A	PASS	A	intron_variant	MODIFIER	WDR7	WDR7	transcript	XM_038525935.1	protein_coding	6	c.373-1760C>T
chr1	24144815	A	C	PASS	C	upstream_gene_variant	MODIFIER	ME2	ME2	transcript	XM_038525994.1	protein_coding	-1	c.-1654T>G
chr1	24144815	A	C	PASS	C	upstream_gene_variant	MODIFIER	ME2	ME2	transcript	XM_038525995.1	protein_coding	-1	c.-884T>G
chr1	24144815	A	C	PASS	C	intron_variant	MODIFIER	ME2	ME2	transcript	XM_038525993.1	protein_coding	1	c.-13+364T>G
chr1	35906453	A	C	PASS	C	downstream_gene_variant	MODIFIER	TRNAL-UAA_9	TRNAL-UAA_9	transcript	unassigned_transcript_4	protein_coding	-1	c.*4985A>C
chr1	35906453	A	C	PASS	C	intron_variant	MODIFIER	LOC106558637	LOC106558637	transcript	XR_005353620.1	pseudogene	2	n.396+646A>C
chr1	35906453	A	C	PASS	C	intron_variant	MODIFIER	LOC106558637	LOC106558637	transcript	XR_005353619.1	pseudogene	1	n.275+4988A>C
chr1	55903907	T	TG	PASS	TG	intergenic_region	MODIFIER	LOC111095986-LOC111095989	LOC111095986-LOC111095989	intergenic_region	LOC111095986_3-LOC111095989_3		-1	n.55903907_55903908insG
chr1	57007996	GAAAGAAA	G	PASS	G	intron_variant	MODIFIER	LOC102153803	LOC102153803	transcript	XR_005353106.1	pseudogene	1	n.459+285_459+291delTTTCTTT
chr1	57007996	GAAAGAAA	G	PASS	G	intron_variant	MODIFIER	LOC102153803	LOC102153803	transcript	XR_005353107.1	pseudogene	2	n.259+285_259+291delTTTCTTT
chr1	77741657	G	A	PASS	A	intergenic_region	MODIFIER	LOC119867965-LOC100684363	LOC119867965-LOC100684363	intergenic_region	LOC119867965_3-LOC100684363_3		-1	n.77741657G>A
chr1	85835264	G	A	PASS	A	intergenic_region	MODIFIER	TMC1-LOC119869527	TMC1-LOC119869527	intergenic_region	TMC1_3-LOC119869527_3		-1	n.85835264G>A
chr1	85904366	G	A	PASS	A	intergenic_region	MODIFIER	TMC1-LOC119869527	TMC1-LOC119869527	intergenic_region	TMC1_3-LOC119869527_3		-1	n.85904366G>A
chr1	85905391	G	A	PASS	A	intergenic_region	MODIFIER	TMC1-LOC119869527	TMC1-LOC119869527	intergenic_region	TMC1_3-LOC119869527_3		-1	n.85905391G>A
chr1	85910304	C	T	PASS	T	intergenic_region	MODIFIER	TMC1-LOC119869527	TMC1-LOC119869527	intergenic_region	TMC1_3-LOC119869527_3		-1	n.85910304C>T
chr1	85911565	AAAGTCGGTGG	A	PASS	A	intergenic_region	MODIFIER	TMC1-LOC119869527	TMC1-LOC119869527	intergenic_region	TMC1_3-LOC119869527_3		-1	n.85911566_85911575delAAGTCGGTGG
chr1	85911591	A	G	PASS	G	intergenic_region	MODIFIER	TMC1-LOC119869527	TMC1-LOC119869527	intergenic_region	TMC1_3-LOC119869527_3		-1	n.85911591A>G
chr1	85911720	G	C	PASS	C	intergenic_region	MODIFIER	TMC1-LOC119869527	TMC1-LOC119869527	intergenic_region	TMC1_3-LOC119869527_3		-1	n.85911720G>C
chr1	85911758	T	G	PASS	G	intergenic_region	MODIFIER	TMC1-LOC119869527	TMC1-LOC119869527	intergenic_region	TMC1_3-LOC119869527_3		-1	n.85911758T>G
chr1	85913654	G	A	PASS	A	intergenic_region	MODIFIER	TMC1-LOC119869527	TMC1-LOC119869527	intergenic_region	TMC1_3-LOC119869527_3		-1	n.85913654G>A
chr1	85913684	A	G	PASS	G	intergenic_region	MODIFIER	TMC1-LOC119869527	TMC1-LOC119869527	intergenic_region	TMC1_3-LOC119869527_3		-1	n.85913684A>G
chr1	85914407	A	G	PASS	G	intergenic_region	MODIFIER	TMC1-LOC119869527	TMC1-LOC119869527	intergenic_region	TMC1_3-LOC119869527_3		-1	n.85914407A>G
chr1	85916223	C	T	PASS	T	intergenic_region	MODIFIER	TMC1-LOC119869527	TMC1-LOC119869527	intergenic_region	TMC1_3-LOC119869527_3		-1	n.85916223C>T
chr1	85916383	T	C	PASS	C	intergenic_region	MODIFIER	TMC1-LOC119869527	TMC1-LOC119869527	intergenic_region	TMC1_3-LOC119869527_3		-1	n.85916383T>C
chr1	85916806	T	C	PASS	C	intergenic_region	MODIFIER	TMC1-LOC119869527	TMC1-LOC119869527	intergenic_region	TMC1_3-LOC119869527_3		-1	n.85916806T>C
chr1	85918009	G	A	PASS	A	intergenic_region	MODIFIER	TMC1-LOC119869527	TMC1-LOC119869527	intergenic_region	TMC1_3-LOC119869527_3		-1	n.85918009G>A
chr1	85918015	C	T	PASS	T	intergenic_region	MODIFIER	TMC1-LOC119869527	TMC1-LOC119869527	intergenic_region	TMC1_3-LOC119869527_3		-1	n.85918015C>T
chr1	85918056	G	A	PASS	A	intergenic_region	MODIFIER	TMC1-LOC119869527	TMC1-LOC119869527	intergenic_region	TMC1_3-LOC119869527_3		-1	n.85918056G>A
chr1	85918210	G	T	PASS	T	intergenic_region	MODIFIER	TMC1-LOC119869527	TMC1-LOC119869527	intergenic_region	TMC1_3-LOC119869527_3		-1	n.85918210G>T
chr1	85918449	C	T	PASS	T	intergenic_region	MODIFIER	TMC1-LOC119869527	TMC1-LOC119869527	intergenic_region	TMC1_3-LOC119869527_3		-1	n.85918449C>T
chr1	85919017	C	T	PASS	T	intergenic_region	MODIFIER	TMC1-LOC119869527	TMC1-LOC119869527	intergenic_region	TMC1_3-LOC119869527_3		-1	n.85919017C>T
chr1	85919029	T	C	PASS	C	intergenic_region	MODIFIER	TMC1-LOC119869527	TMC1-LOC119869527	intergenic_region	TMC1_3-LOC119869527_3		-1	n.85919029T>C
chr1	85919893	G	C	PASS	C	intergenic_region	MODIFIER	TMC1-LOC119869527	TMC1-LOC119869527	intergenic_region	TMC1_3-LOC119869527_3		-1	n.85919893G>C
chr1	85920173	C	G	PASS	G	intergenic_region	MODIFIER	TMC1-LOC119869527	TMC1-LOC119869527	intergenic_region	TMC1_3-LOC119869527_3		-1	n.85920173C>G
chr1	85922685	G	A	PASS	A	intergenic_region	MODIFIER	TMC1-LOC119869527	TMC1-LOC119869527	intergenic_region	TMC1_3-LOC119869527_3		-1	n.85922685G>A
chr1	85923854	C	T	PASS	T	intergenic_region	MODIFIER	TMC1-LOC119869527	TMC1-LOC119869527	intergenic_region	TMC1_3-LOC119869527_3		-1	n.85923854C>T
chr1	85928084	C	G	PASS	G	intergenic_region	MODIFIER	TMC1-LOC119869527	TMC1-LOC119869527	intergenic_region	TMC1_3-LOC119869527_3		-1	n.85928084C>G
chr1	86140673	T	C	PASS	C	intron_variant	MODIFIER	LOC119870834	LOC119870834	transcript	XR_005354180.1	pseudogene	1	n.114+834A>G
chr1	86140673	T	C	PASS	C	intron_variant	MODIFIER	LOC119870834	LOC119870834	transcript	XR_005354177.1	pseudogene	1	n.169+1651A>G
chr1	86140673	T	C	PASS	C	intron_variant	MODIFIER	LOC119870834	LOC119870834	transcript	XR_005354178.1	pseudogene	1	n.203+1617A>G
chr1	86140673	T	C	PASS	C	intron_variant	MODIFIER	LOC119870834	LOC119870834	transcript	XR_005354181.1	pseudogene	1	n.88+1751A>G
chr1	86214627	ACT	A	PASS	A	intron_variant	MODIFIER	GDA	GDA	transcript	XM_038527081.1	protein_coding	3	c.385-1499_385-1498delAG
chr1	86221804	AT	A	PASS	A	intron_variant	MODIFIER	GDA	GDA	transcript	XM_038527081.1	protein_coding	2	c.213-1375delA
chr1	86266956	T	C	PASS	C	intergenic_region	MODIFIER	GDA-LOC102153343	GDA-LOC102153343	intergenic_region	GDA_3-LOC102153343_3		-1	n.86266956T>C
chr1	86269497	C	CTGTTACCT	PASS	CTGTTACCT	intergenic_region	MODIFIER	GDA-LOC102153343	GDA-LOC102153343	intergenic_region	GDA_3-LOC102153343_3		-1	n.86269497_86269498insTGTTACCT
chr1	86269780	C	T	PASS	T	intergenic_region	MODIFIER	GDA-LOC102153343	GDA-LOC102153343	intergenic_region	GDA_3-LOC102153343_3		-1	n.86269780C>T
chr1	86278706	G	A	PASS	A	intergenic_region	MODIFIER	GDA-LOC102153343	GDA-LOC102153343	intergenic_region	GDA_3-LOC102153343_3		-1	n.86278706G>A
chr1	86279789	C	A	PASS	A	intergenic_region	MODIFIER	GDA-LOC102153343	GDA-LOC102153343	intergenic_region	GDA_3-LOC102153343_3		-1	n.86279789C>A
chr1	86280452	G	T	PASS	T	intergenic_region	MODIFIER	GDA-LOC102153343	GDA-LOC102153343	intergenic_region	GDA_3-LOC102153343_3		-1	n.86280452G>T
chr1	86283329	C	T	PASS	T	intergenic_region	MODIFIER	GDA-LOC102153343	GDA-LOC102153343	intergenic_region	GDA_3-LOC102153343_3		-1	n.86283329C>T
chr1	86340412	C	G	PASS	G	intergenic_region	MODIFIER	GDA-LOC102153343	GDA-LOC102153343	intergenic_region	GDA_3-LOC102153343_3		-1	n.86340412C>G
chr1	86355345	C	CCT	PASS	CCT	intron_variant	MODIFIER	LOC102153343	LOC102153343	transcript	XR_005354182.1	pseudogene	1	n.299-1390_299-1389insCT
chr1	86360960	C	T	PASS	T	downstream_gene_variant	MODIFIER	LOC102153343	LOC102153343	transcript	XR_005354182.1	pseudogene	-1	n.*3831C>T
chr1	86360960	C	T	PASS	T	intergenic_region	MODIFIER	LOC102153343-C1H9orf85	LOC102153343-C1H9orf85	intergenic_region	LOC102153343_3-C1H9orf85_3		-1	n.86360960C>T
chr1	86368200	C	T	PASS	T	intergenic_region	MODIFIER	LOC102153343-C1H9orf85	LOC102153343-C1H9orf85	intergenic_region	LOC102153343_3-C1H9orf85_3		-1	n.86368200C>T
chr1	86370306	C	T	PASS	T	intergenic_region	MODIFIER	LOC102153343-C1H9orf85	LOC102153343-C1H9orf85	intergenic_region	LOC102153343_3-C1H9orf85_3		-1	n.86370306C>T
chr1	86371365	C	T	PASS	T	intergenic_region	MODIFIER	LOC102153343-C1H9orf85	LOC102153343-C1H9orf85	intergenic_region	LOC102153343_3-C1H9orf85_3		-1	n.86371365C>T
chr1	86415175	A	ATTT	PASS	ATTT	intergenic_region	MODIFIER	LOC102153343-C1H9orf85	LOC102153343-C1H9orf85	intergenic_region	LOC102153343_3-C1H9orf85_3		-1	n.86415175_86415176insTTT
chr1	86445009	ACT	A	ReadPosRankSum-2	A	intron_variant	MODIFIER	C1H9orf85	C1H9orf85	transcript	XM_038527087.1	protein_coding	2	c.209+482_209+483delAG
chr1	86445009	ACT	A	ReadPosRankSum-2	A	intron_variant	MODIFIER	C1H9orf85	C1H9orf85	transcript	XM_038527088.1	protein_coding	2	c.185+482_185+483delAG
chr1	86450564	T	A	PASS	A	intron_variant	MODIFIER	C1H9orf85	C1H9orf85	transcript	XM_038527087.1	protein_coding	1	c.103-4965A>T
chr1	86450564	T	A	PASS	A	intron_variant	MODIFIER	C1H9orf85	C1H9orf85	transcript	XM_038527088.1	protein_coding	1	c.78+3932A>T
chr1	86478430	A	AT	PASS	AT	upstream_gene_variant	MODIFIER	ABHD17B	ABHD17B	transcript	XM_038527082.1	protein_coding	-1	c.-4611_-4610insT
chr1	86478430	A	AT	PASS	AT	upstream_gene_variant	MODIFIER	ABHD17B	ABHD17B	transcript	XM_038527086.1	protein_coding	-1	c.-4171_-4170insT
chr1	86478430	A	AT	PASS	AT	intron_variant	MODIFIER	C1H9orf85	C1H9orf85	transcript	XM_038527087.1	protein_coding	1	c.102+3383_102+3384insA
chr1	86479615	C	T	PASS	T	upstream_gene_variant	MODIFIER	ABHD17B	ABHD17B	transcript	XM_038527082.1	protein_coding	-1	c.-3426C>T
chr1	86479615	C	T	PASS	T	upstream_gene_variant	MODIFIER	ABHD17B	ABHD17B	transcript	XM_038527086.1	protein_coding	-1	c.-2986C>T
chr1	86479615	C	T	PASS	T	intron_variant	MODIFIER	C1H9orf85	C1H9orf85	transcript	XM_038527087.1	protein_coding	1	c.102+2199G>A
chr1	86481408	C	G	PASS	G	upstream_gene_variant	MODIFIER	ABHD17B	ABHD17B	transcript	XM_038527082.1	protein_coding	-1	c.-1633C>G
chr1	86481408	C	G	PASS	G	upstream_gene_variant	MODIFIER	ABHD17B	ABHD17B	transcript	XM_038527086.1	protein_coding	-1	c.-1193C>G
chr1	86481408	C	G	PASS	G	intron_variant	MODIFIER	C1H9orf85	C1H9orf85	transcript	XM_038527087.1	protein_coding	1	c.102+406G>C
chr1	86994817	T	A	PASS	A	intergenic_region	MODIFIER	CEMIP2-LOC100683128	CEMIP2-LOC100683128	intergenic_region	CEMIP2_3-LOC100683128_3		-1	n.86994817T>A
chr1	87470136	T	G	PASS	G	intron_variant	MODIFIER	TRPM3	TRPM3	transcript	XM_038527093.1	protein_coding	5	c.802-6519T>G
chr1	87470136	T	G	PASS	G	intron_variant	MODIFIER	LOC111096727	LOC111096727	transcript	XR_005354186.1	pseudogene	2	n.379-55786A>C
chr1	87470136	T	G	PASS	G	intron_variant	MODIFIER	TRPM3	TRPM3	transcript	XM_038527094.1	protein_coding	5	c.802-6519T>G
chr1	87470136	T	G	PASS	G	intron_variant	MODIFIER	TRPM3	TRPM3	transcript	XM_038527095.1	protein_coding	5	c.802-6519T>G
chr1	87470136	T	G	PASS	G	intron_variant	MODIFIER	TRPM3	TRPM3	transcript	XM_038527096.1	protein_coding	5	c.802-6519T>G
chr1	87470136	T	G	PASS	G	intron_variant	MODIFIER	TRPM3	TRPM3	transcript	XM_038527097.1	protein_coding	5	c.802-6519T>G
chr1	87470136	T	G	PASS	G	intron_variant	MODIFIER	TRPM3	TRPM3	transcript	XM_038527098.1	protein_coding	5	c.802-6519T>G
chr1	87470136	T	G	PASS	G	intron_variant	MODIFIER	TRPM3	TRPM3	transcript	XM_038527099.1	protein_coding	5	c.802-6519T>G
chr1	87470136	T	G	PASS	G	intron_variant	MODIFIER	TRPM3	TRPM3	transcript	XM_038527100.1	protein_coding	5	c.802-6519T>G
chr1	87470136	T	G	PASS	G	intron_variant	MODIFIER	TRPM3	TRPM3	transcript	XM_038527103.1	protein_coding	5	c.802-6519T>G
chr1	87470136	T	G	PASS	G	intron_variant	MODIFIER	TRPM3	TRPM3	transcript	XM_038527101.1	protein_coding	5	c.802-6519T>G
chr1	87470136	T	G	PASS	G	intron_variant	MODIFIER	TRPM3	TRPM3	transcript	XM_038527102.1	protein_coding	5	c.802-6519T>G
chr1	87470136	T	G	PASS	G	intron_variant	MODIFIER	LOC111096727	LOC111096727	transcript	XR_005354184.1	pseudogene	2	n.379-55786A>C
chr1	87470136	T	G	PASS	G	intron_variant	MODIFIER	LOC111096727	LOC111096727	transcript	XR_005354185.1	pseudogene	2	n.379-55786A>C
chr1	87470136	T	G	PASS	G	intron_variant	MODIFIER	LOC111096727	LOC111096727	transcript	XR_005354187.1	pseudogene	2	n.379-55786A>C
chr1	87763185	A	T	PASS	T	intron_variant	MODIFIER	LOC119870835	LOC119870835	transcript	XR_005354196.1	pseudogene	1	n.137+14938T>A
chr1	88436896	G	A	PASS	A	downstream_gene_variant	MODIFIER	PTAR1	PTAR1	transcript	XM_038527113.1	protein_coding	-1	c.*12201G>A
chr1	88436896	G	A	PASS	A	downstream_gene_variant	MODIFIER	PTAR1	PTAR1	transcript	XM_038527114.1	protein_coding	-1	c.*12201G>A
chr1	88436896	G	A	PASS	A	downstream_gene_variant	MODIFIER	PTAR1	PTAR1	transcript	XM_038527115.1	protein_coding	-1	c.*12201G>A
chr1	88436896	G	A	PASS	A	downstream_gene_variant	MODIFIER	PTAR1	PTAR1	transcript	XM_038527116.1	protein_coding	-1	c.*12201G>A
chr1	88436896	G	A	PASS	A	downstream_gene_variant	MODIFIER	PTAR1	PTAR1	transcript	XM_038527117.1	protein_coding	-1	c.*12201G>A
chr1	88436896	G	A	PASS	A	downstream_gene_variant	MODIFIER	PTAR1	PTAR1	transcript	XM_038527118.1	protein_coding	-1	c.*12201G>A
chr1	88436896	G	A	PASS	A	downstream_gene_variant	MODIFIER	PTAR1	PTAR1	transcript	XM_038527119.1	protein_coding	-1	c.*12201G>A
chr1	88436896	G	A	PASS	A	downstream_gene_variant	MODIFIER	PTAR1	PTAR1	transcript	XM_038527120.1	protein_coding	-1	c.*12201G>A
chr1	88436896	G	A	PASS	A	downstream_gene_variant	MODIFIER	PTAR1	PTAR1	transcript	XM_038527121.1	protein_coding	-1	c.*12201G>A
chr1	88436896	G	A	PASS	A	downstream_gene_variant	MODIFIER	PTAR1	PTAR1	transcript	XM_038527122.1	protein_coding	-1	c.*12201G>A
chr1	88436896	G	A	PASS	A	intergenic_region	MODIFIER	PTAR1-APBA1	PTAR1-APBA1	intergenic_region	PTAR1_3-APBA1_3		-1	n.88436896G>A
chr1	88973752	T	TAAAAATAAAAAAATAAAA	PASS	TAAAAATAAAAAAATAAAA	intron_variant	MODIFIER	FXN	FXN	transcript	NM_001109958.1_3	protein_coding	3	c.387+553_387+554insTTTTATTTTTTTATTTTT
chr1	88973760	T	A	PASS	A	intron_variant	MODIFIER	FXN	FXN	transcript	NM_001109958.1_3	protein_coding	3	c.387+546A>T
chr1	88977245	C	T	PASS	T	intron_variant	MODIFIER	FXN	FXN	transcript	NM_001109958.1_3	protein_coding	1	c.169-152G>A
chr1	89657898	G	T	PASS	T	intron_variant	MODIFIER	PGM5	PGM5	transcript	XM_038527145.1	protein_coding	2	c.425-852C>A
chr1	90261407	G	A	PASS	A	upstream_gene_variant	MODIFIER	KANK1	KANK1	transcript	XM_038527150.1	protein_coding	-1	c.-1220G>A
chr1	90261407	G	A	PASS	A	upstream_gene_variant	MODIFIER	KANK1	KANK1	transcript	XM_038527151.1	protein_coding	-1	c.-1220G>A
chr1	90261407	G	A	PASS	A	upstream_gene_variant	MODIFIER	KANK1	KANK1	transcript	XM_038527152.1	protein_coding	-1	c.-1220G>A
chr1	90261407	G	A	PASS	A	intron_variant	MODIFIER	KANK1	KANK1	transcript	XM_038527148.1	protein_coding	3	c.38-783G>A
chr1	90261407	G	A	PASS	A	intron_variant	MODIFIER	KANK1	KANK1	transcript	XM_038527149.1	protein_coding	3	c.38-783G>A
chr1	90261407	G	A	PASS	A	intron_variant	MODIFIER	KANK1	KANK1	transcript	XM_038527153.1	protein_coding	2	c.-437-783G>A
chr1	90261407	G	A	PASS	A	intron_variant	MODIFIER	KANK1	KANK1	transcript	XM_038527154.1	protein_coding	1	c.-437-783G>A
chr1	90261407	G	A	PASS	A	intron_variant	MODIFIER	KANK1	KANK1	transcript	XM_038527155.1	protein_coding	1	c.-437-783G>A
chr1	90261407	G	A	PASS	A	intron_variant	MODIFIER	KANK1	KANK1	transcript	XM_038527156.1	protein_coding	1	c.-437-783G>A
chr1	90261407	G	A	PASS	A	intron_variant	MODIFIER	KANK1	KANK1	transcript	XM_038527157.1	protein_coding	1	c.-437-783G>A
chr1	98252785	G	A	PASS	A	intron_variant	MODIFIER	LOC111097082_2	LOC111097082_2	transcript	XR_005354340.1	pseudogene	2	n.222+11348G>A
chr1	98252785	G	A	PASS	A	intron_variant	MODIFIER	LOC111097082_2	LOC111097082_2	transcript	XR_005354341.1	pseudogene	2	n.222+11348G>A
chr1	98252860	G	A	PASS	A	intron_variant	MODIFIER	LOC111097082_2	LOC111097082_2	transcript	XR_005354340.1	pseudogene	2	n.222+11423G>A
chr1	98252860	G	A	PASS	A	intron_variant	MODIFIER	LOC111097082_2	LOC111097082_2	transcript	XR_005354341.1	pseudogene	2	n.222+11423G>A
chr1	98253094	A	T	PASS	T	intron_variant	MODIFIER	LOC111097082_2	LOC111097082_2	transcript	XR_005354340.1	pseudogene	2	n.222+11657A>T
chr1	98253094	A	T	PASS	T	intron_variant	MODIFIER	LOC111097082_2	LOC111097082_2	transcript	XR_005354341.1	pseudogene	2	n.222+11657A>T
chr1	98253095	T	C	PASS	C	intron_variant	MODIFIER	LOC111097082_2	LOC111097082_2	transcript	XR_005354340.1	pseudogene	2	n.222+11658T>C
chr1	98253095	T	C	PASS	C	intron_variant	MODIFIER	LOC111097082_2	LOC111097082_2	transcript	XR_005354341.1	pseudogene	2	n.222+11658T>C
chr1	105101545	AT	A	PASS	A	intron_variant	MODIFIER	LOC119875995_1	LOC119875995_1	transcript	XM_038527925.1	protein_coding	5	c.283+1005delA
chr1	105101545	AT	A	PASS	A	intron_variant	MODIFIER	LOC119875995_1	LOC119875995_1	transcript	XM_038527926.1	protein_coding	3	c.265+1005delA
chr1	121181651	G	A	PASS	A	intergenic_region	MODIFIER	LOC111090841-LOC102152485	LOC111090841-LOC102152485	intergenic_region	LOC111090841_3-LOC102152485_3		-1	n.121181651G>A
chr1	121181655	T	C	PASS	C	intergenic_region	MODIFIER	LOC111090841-LOC102152485	LOC111090841-LOC102152485	intergenic_region	LOC111090841_3-LOC102152485_3		-1	n.121181655T>C
chr1	121181665	C	T	PASS	T	intergenic_region	MODIFIER	LOC111090841-LOC102152485	LOC111090841-LOC102152485	intergenic_region	LOC111090841_3-LOC102152485_3		-1	n.121181665C>T
chr1	121615652	T	C	PASS	C	intergenic_region	MODIFIER	TSHZ3-LOC119863924	TSHZ3-LOC119863924	intergenic_region	TSHZ3_3-LOC119863924_3		-1	n.121615652T>C
chr2	501455	G	A	PASS	A	intergenic_region	MODIFIER	LOC100687763-LOC100856010	LOC100687763-LOC100856010	intergenic_region	LOC100687763_3-LOC100856010_3		-1	n.501455G>A
chr2	11514216	C	CT	PASS	CT	intron_variant	MODIFIER	MALRD1	MALRD1	transcript	XM_038532060.1	protein_coding	19	c.2927-10139_2927-10138insA
chr2	12084482	A	G	PASS	G	intergenic_region	MODIFIER	LOC119871047-LOC111091118	LOC119871047-LOC111091118	intergenic_region	LOC119871047_3-LOC111091118_3		-1	n.12084482A>G
chr2	14223890	CT	C	PASS	C	intergenic_region	MODIFIER	LOC119870119-JCAD	LOC119870119-JCAD	intergenic_region	LOC119870119_3-JCAD_3		-1	n.14223891delT
chr2	16920072	C	CG	PASS	CG	intron_variant	MODIFIER	LOC119869194_2	LOC119869194_2	transcript	XM_038529931.1	protein_coding	20	c.*413-4090_*413-4089insC
chr2	16920072	C	CG	PASS	CG	intron_variant	MODIFIER	LOC119869194_2	LOC119869194_2	transcript	XM_038529939.1	protein_coding	15	c.*413-4090_*413-4089insC
chr2	16920072	C	CG	PASS	CG	intron_variant	MODIFIER	LOC119869194_2	LOC119869194_2	transcript	XM_038529938.1	protein_coding	18	c.*413-4090_*413-4089insC
chr2	16920072	C	CG	PASS	CG	intron_variant	MODIFIER	LOC119869194_2	LOC119869194_2	transcript	XM_038529936.1	protein_coding	21	c.*413-4090_*413-4089insC
chr2	16920072	C	CG	PASS	CG	intron_variant	MODIFIER	LOC119869194_2	LOC119869194_2	transcript	XM_038529937.1	protein_coding	19	c.*413-4090_*413-4089insC
chr2	16920072	C	CG	PASS	CG	intron_variant	MODIFIER	LOC119869194_2	LOC119869194_2	transcript	XM_038529932.1	protein_coding	24	c.*413-4090_*413-4089insC
chr2	16920072	C	CG	PASS	CG	intron_variant	MODIFIER	LOC119869194_2	LOC119869194_2	transcript	XM_038529934.1	protein_coding	23	c.*413-4090_*413-4089insC
chr2	16920072	C	CG	PASS	CG	intron_variant	MODIFIER	LOC119869194_2	LOC119869194_2	transcript	XM_038529933.1	protein_coding	23	c.*413-4090_*413-4089insC
chr2	16920072	C	CG	PASS	CG	intron_variant	MODIFIER	LOC119869194_2	LOC119869194_2	transcript	XM_038529935.1	protein_coding	22	c.*413-4090_*413-4089insC
chr2	17063779	G	A	PASS	A	intron_variant	MODIFIER	LOC119869194_2	LOC119869194_2	transcript	XM_038529932.1	protein_coding	4	c.-165-1525C>T
chr2	17063779	G	A	PASS	A	intron_variant	MODIFIER	LOC119869194_2	LOC119869194_2	transcript	XM_038529934.1	protein_coding	4	c.-38+2599C>T
chr2	17063779	G	A	PASS	A	intron_variant	MODIFIER	LOC119869194_2	LOC119869194_2	transcript	XM_038529933.1	protein_coding	3	c.-165-1525C>T
chr2	17063779	G	A	PASS	A	intron_variant	MODIFIER	LOC119869194_2	LOC119869194_2	transcript	XM_038529935.1	protein_coding	3	c.-38+2599C>T
chr2	21009655	A	G	PASS	G	intron_variant	MODIFIER	FAM107B	FAM107B	transcript	XM_038530059.1	protein_coding	1	c.-56-28295A>G
chr2	21009655	A	G	PASS	G	intron_variant	MODIFIER	FAM107B	FAM107B	transcript	XM_038530057.1	protein_coding	1	c.-56-28295A>G
chr2	22472645	C	T	PASS	T	intron_variant	MODIFIER	LOC119869988	LOC119869988	transcript	XR_005354947.1	pseudogene	2	n.277+2461C>T
chr2	22676987	C	T	PASS	T	intergenic_region	MODIFIER	CCDC3-LOC119876104	CCDC3-LOC119876104	intergenic_region	CCDC3_3-LOC119876104		-1	n.22676987C>T
chr2	22828795	A	G	PASS	G	intron_variant	MODIFIER	CAMK1D	CAMK1D	transcript	XM_038530114.1	protein_coding	3	c.300-23488T>C
chr2	22828795	A	G	PASS	G	intron_variant	MODIFIER	CAMK1D	CAMK1D	transcript	XM_038530116.1	protein_coding	1	c.27-23488T>C
chr2	22828795	A	G	PASS	G	intron_variant	MODIFIER	CAMK1D	CAMK1D	transcript	XM_038530115.1	protein_coding	3	c.300-23488T>C
chr2	22843334	T	C	PASS	C	intron_variant	MODIFIER	CAMK1D	CAMK1D	transcript	XM_038530114.1	protein_coding	3	c.300-38027A>G
chr2	22843334	T	C	PASS	C	intron_variant	MODIFIER	CAMK1D	CAMK1D	transcript	XM_038530116.1	protein_coding	1	c.27-38027A>G
chr2	22843334	T	C	PASS	C	intron_variant	MODIFIER	CAMK1D	CAMK1D	transcript	XM_038530115.1	protein_coding	3	c.300-38027A>G
chr2	22849294	G	A	PASS	A	intron_variant	MODIFIER	CAMK1D	CAMK1D	transcript	XM_038530114.1	protein_coding	3	c.300-43987C>T
chr2	22849294	G	A	PASS	A	intron_variant	MODIFIER	CAMK1D	CAMK1D	transcript	XM_038530116.1	protein_coding	1	c.26+43646C>T
chr2	22849294	G	A	PASS	A	intron_variant	MODIFIER	CAMK1D	CAMK1D	transcript	XM_038530115.1	protein_coding	3	c.300-43987C>T
chr2	22851574	C	T	PASS	T	intron_variant	MODIFIER	CAMK1D	CAMK1D	transcript	XM_038530114.1	protein_coding	3	c.300-46267G>A
chr2	22851574	C	T	PASS	T	intron_variant	MODIFIER	CAMK1D	CAMK1D	transcript	XM_038530116.1	protein_coding	1	c.26+41366G>A
chr2	22851574	C	T	PASS	T	intron_variant	MODIFIER	CAMK1D	CAMK1D	transcript	XM_038530115.1	protein_coding	3	c.300-46267G>A
chr2	22917389	G	A	PASS	A	intron_variant	MODIFIER	CAMK1D	CAMK1D	transcript	XM_038530114.1	protein_coding	2	c.225-5549C>T
chr2	22917389	G	A	PASS	A	intron_variant	MODIFIER	CAMK1D	CAMK1D	transcript	XM_038530115.1	protein_coding	2	c.225-5549C>T
chr2	22929361	G	A	PASS	A	intron_variant	MODIFIER	CAMK1D	CAMK1D	transcript	XM_038530114.1	protein_coding	2	c.225-17521C>T
chr2	22929361	G	A	PASS	A	intron_variant	MODIFIER	CAMK1D	CAMK1D	transcript	XM_038530115.1	protein_coding	2	c.225-17521C>T
chr2	23874626	A	C	PASS	C	upstream_gene_variant	MODIFIER	USP6NL	USP6NL	transcript	XM_038530141.1	protein_coding	-1	c.-4298A>C
chr2	23874626	A	C	PASS	C	intron_variant	MODIFIER	USP6NL	USP6NL	transcript	XM_038530139.1	protein_coding	1	c.68-2098A>C
chr2	23874626	A	C	PASS	C	intron_variant	MODIFIER	USP6NL	USP6NL	transcript	XM_038530140.1	protein_coding	2	c.5-2098A>C
chr2	23874634	A	T	PASS	T	upstream_gene_variant	MODIFIER	USP6NL	USP6NL	transcript	XM_038530141.1	protein_coding	-1	c.-4290A>T
chr2	23874634	A	T	PASS	T	intron_variant	MODIFIER	USP6NL	USP6NL	transcript	XM_038530139.1	protein_coding	1	c.68-2090A>T
chr2	23874634	A	T	PASS	T	intron_variant	MODIFIER	USP6NL	USP6NL	transcript	XM_038530140.1	protein_coding	2	c.5-2090A>T
chr2	26725125	G	A	PASS	A	intergenic_region	MODIFIER	LOC119869991-LOC111094528	LOC119869991-LOC111094528	intergenic_region	LOC119869991_3-LOC111094528_3		-1	n.26725125G>A
chr2	31789229	C	G	VQSRTrancheSNP99.90to100.00	G	intergenic_region	MODIFIER	LOC111094564-LOC100687336	LOC111094564-LOC100687336	intergenic_region	LOC111094564_3-LOC100687336_3		-1	n.31789229C>G
chr2	37874908	C	CTTTCTTTCTTTCTTTCTTTCTTTCTTTCTTTCTTTCTTTCTTCTTTCTT	PASS	CTTTCTTTCTTTCTTTCTTTCTTTCTTTCTTTCTTTCTTTCTTCTTTCTT	intergenic_region	MODIFIER	LOC111094604-LOC119870003	LOC111094604-LOC119870003	intergenic_region	LOC111094604_3-LOC119870003_3		-1	n.37874908_37874909insTTTCTTTCTTTCTTTCTTTCTTTCTTTCTTTCTTTCTTTCTTCTTTCTT
chr2	45409743	A	AAAAAAAAAAAAAAAAAAAAAAAAAAAAAT	PASS	AAAAAAAAAAAAAAAAAAAAAAAAAAAAAT	intron_variant	MODIFIER	PDE4D	PDE4D	transcript	XM_038530650.1	protein_coding	1	c.456-151598_456-151597insATTTTTTTTTTTTTTTTTTTTTTTTTTTT
chr2	45409743	A	AAAAAAAAAAAAAAAAAAAAAAAAAAAAAT	PASS	AAAAAAAAAAAAAAAAAAAAAAAAAAAAAT	intron_variant	MODIFIER	PDE4D	PDE4D	transcript	XM_038530660.1	protein_coding	1	c.125+36947_125+36948insATTTTTTTTTTTTTTTTTTTTTTTTTTTT
chr2	45409743	A	AAAAAAAAAAAAAAAAAAAAAAAAAAAAAT	PASS	AAAAAAAAAAAAAAAAAAAAAAAAAAAAAT	intron_variant	MODIFIER	PDE4D	PDE4D	transcript	XM_038530664.1	protein_coding	1	c.48-151598_48-151597insATTTTTTTTTTTTTTTTTTTTTTTTTTTT
chr2	45409743	A	AAAAAAAAAAAAAAAAAAAAAAAAAAAAAT	PASS	AAAAAAAAAAAAAAAAAAAAAAAAAAAAAT	intron_variant	MODIFIER	PDE4D	PDE4D	transcript	XM_038530663.1	protein_coding	1	c.57-151598_57-151597insATTTTTTTTTTTTTTTTTTTTTTTTTTTT
chr2	45409743	A	AAAAAAAAAAAAAAAAAAAAAAAAAAAAAT	PASS	AAAAAAAAAAAAAAAAAAAAAAAAAAAAAT	intron_variant	MODIFIER	PDE4D	PDE4D	transcript	XM_038530658.1	protein_coding	1	c.267-151598_267-151597insATTTTTTTTTTTTTTTTTTTTTTTTTTTT
chr2	45409743	A	AAAAAAAAAAAAAAAAAAAAAAAAAAAAAT	PASS	AAAAAAAAAAAAAAAAAAAAAAAAAAAAAT	intron_variant	MODIFIER	PDE4D	PDE4D	transcript	XM_038530659.1	protein_coding	2	c.177-151598_177-151597insATTTTTTTTTTTTTTTTTTTTTTTTTTTT
chr2	45409743	A	AAAAAAAAAAAAAAAAAAAAAAAAAAAAAT	PASS	AAAAAAAAAAAAAAAAAAAAAAAAAAAAAT	intron_variant	MODIFIER	PDE4D	PDE4D	transcript	XM_038530657.1	protein_coding	3	c.273-151598_273-151597insATTTTTTTTTTTTTTTTTTTTTTTTTTTT
chr2	45409743	A	AAAAAAAAAAAAAAAAAAAAAAAAAAAAAT	PASS	AAAAAAAAAAAAAAAAAAAAAAAAAAAAAT	intron_variant	MODIFIER	PDE4D	PDE4D	transcript	XM_038530655.1	protein_coding	4	c.273-151598_273-151597insATTTTTTTTTTTTTTTTTTTTTTTTTTTT
chr2	45409743	A	AAAAAAAAAAAAAAAAAAAAAAAAAAAAAT	PASS	AAAAAAAAAAAAAAAAAAAAAAAAAAAAAT	intron_variant	MODIFIER	PDE4D	PDE4D	transcript	XM_038530656.1	protein_coding	3	c.273-151598_273-151597insATTTTTTTTTTTTTTTTTTTTTTTTTTTT
chr2	45409743	A	AAAAAAAAAAAAAAAAAAAAAAAAAAAAAT	PASS	AAAAAAAAAAAAAAAAAAAAAAAAAAAAAT	intron_variant	MODIFIER	PDE4D	PDE4D	transcript	XM_038530651.1	protein_coding	8	c.273-151598_273-151597insATTTTTTTTTTTTTTTTTTTTTTTTTTTT
chr2	45409743	A	AAAAAAAAAAAAAAAAAAAAAAAAAAAAAT	PASS	AAAAAAAAAAAAAAAAAAAAAAAAAAAAAT	intron_variant	MODIFIER	PDE4D	PDE4D	transcript	XM_038530652.1	protein_coding	5	c.273-151598_273-151597insATTTTTTTTTTTTTTTTTTTTTTTTTTTT
chr2	45409743	A	AAAAAAAAAAAAAAAAAAAAAAAAAAAAAT	PASS	AAAAAAAAAAAAAAAAAAAAAAAAAAAAAT	intron_variant	MODIFIER	PDE4D	PDE4D	transcript	XM_038530653.1	protein_coding	6	c.273-151598_273-151597insATTTTTTTTTTTTTTTTTTTTTTTTTTTT
chr2	45409743	A	AAAAAAAAAAAAAAAAAAAAAAAAAAAAAT	PASS	AAAAAAAAAAAAAAAAAAAAAAAAAAAAAT	intron_variant	MODIFIER	PDE4D	PDE4D	transcript	XM_038530654.1	protein_coding	4	c.273-151598_273-151597insATTTTTTTTTTTTTTTTTTTTTTTTTTTT
chr2	45409743	A	AAAAAAAAAAAAAAAAAAAAAAAAAAAAAT	PASS	AAAAAAAAAAAAAAAAAAAAAAAAAAAAAT	intron_variant	MODIFIER	PDE4D	PDE4D	transcript	XM_038530676.1	protein_coding	6	c.273-151598_273-151597insATTTTTTTTTTTTTTTTTTTTTTTTTTTT
chr2	45409743	A	AAAAAAAAAAAAAAAAAAAAAAAAAAAAAT	PASS	AAAAAAAAAAAAAAAAAAAAAAAAAAAAAT	intron_variant	MODIFIER	PDE4D	PDE4D	transcript	XM_038530675.1	protein_coding	6	c.273-151598_273-151597insATTTTTTTTTTTTTTTTTTTTTTTTTTTT
chr2	46028844	GAAAGAAAGA	G	PASS	G	downstream_gene_variant	MODIFIER	LOC119870608_2	LOC119870608_2	transcript	XR_005356259.1	snRNA	-1	n.*38_*46delAAAGAAAGA
chr2	46028844	GAAAGAAAGA	G	PASS	G	intron_variant	MODIFIER	LOC111094478	LOC111094478	transcript	XR_005355564.1	pseudogene	3	n.454+52402_454+52410delAAAGAAAGA
chr2	46028844	GAAAGAAAGA	G	PASS	G	intron_variant	MODIFIER	PDE4D	PDE4D	transcript	XM_038530657.1	protein_coding	2	c.43-65722_43-65714delTCTTTCTTT
chr2	46028844	GAAAGAAAGA	G	PASS	G	intron_variant	MODIFIER	PDE4D	PDE4D	transcript	XM_038530655.1	protein_coding	3	c.43-65722_43-65714delTCTTTCTTT
chr2	46028844	GAAAGAAAGA	G	PASS	G	intron_variant	MODIFIER	PDE4D	PDE4D	transcript	XM_038530656.1	protein_coding	2	c.43-65722_43-65714delTCTTTCTTT
chr2	46028844	GAAAGAAAGA	G	PASS	G	intron_variant	MODIFIER	PDE4D	PDE4D	transcript	XM_038530651.1	protein_coding	7	c.43-65722_43-65714delTCTTTCTTT
chr2	46028844	GAAAGAAAGA	G	PASS	G	intron_variant	MODIFIER	PDE4D	PDE4D	transcript	XM_038530652.1	protein_coding	4	c.43-65722_43-65714delTCTTTCTTT
chr2	46028844	GAAAGAAAGA	G	PASS	G	intron_variant	MODIFIER	PDE4D	PDE4D	transcript	XM_038530653.1	protein_coding	5	c.43-65722_43-65714delTCTTTCTTT
chr2	46028844	GAAAGAAAGA	G	PASS	G	intron_variant	MODIFIER	PDE4D	PDE4D	transcript	XM_038530654.1	protein_coding	3	c.43-65722_43-65714delTCTTTCTTT
chr2	46028844	GAAAGAAAGA	G	PASS	G	intron_variant	MODIFIER	PDE4D	PDE4D	transcript	XM_038530676.1	protein_coding	5	c.43-65722_43-65714delTCTTTCTTT
chr2	46028844	GAAAGAAAGA	G	PASS	G	intron_variant	MODIFIER	PDE4D	PDE4D	transcript	XM_038530675.1	protein_coding	5	c.43-65722_43-65714delTCTTTCTTT
chr2	46028844	GAAAGAAAGA	G	PASS	G	intron_variant	MODIFIER	LOC111094478	LOC111094478	transcript	XR_005355565.1	pseudogene	2	n.312+52402_312+52410delAAAGAAAGA
chr2	64956585	T	TCC	PASS	TCC	intron_variant	MODIFIER	ZNF423	ZNF423	transcript	XM_038531091.1	protein_coding	5	c.3616+26669_3616+26670insCC
chr2	64956585	T	TCC	PASS	TCC	intron_variant	MODIFIER	ZNF423	ZNF423	transcript	XM_038531093.1	protein_coding	5	c.3412+26669_3412+26670insCC
chr2	64956585	T	TCC	PASS	TCC	intron_variant	MODIFIER	ZNF423	ZNF423	transcript	XM_038531092.1	protein_coding	5	c.3413-17523_3413-17522insCC
chr2	64956585	T	TCC	PASS	TCC	intron_variant	MODIFIER	ZNF423	ZNF423	transcript	XM_038531095.1	protein_coding	3	c.3241+26669_3241+26670insCC
chr2	64956585	T	TCC	PASS	TCC	intron_variant	MODIFIER	ZNF423	ZNF423	transcript	XM_038531096.1	protein_coding	3	c.3241+26669_3241+26670insCC
chr2	77259511	A	T	VQSRTrancheSNP99.90to100.00	T	intron_variant	MODIFIER	EIF4G3	EIF4G3	transcript	XM_038531709.1	protein_coding	1	c.46+38005A>T
chr2	77259511	A	T	VQSRTrancheSNP99.90to100.00	T	intron_variant	MODIFIER	LOC119870447	LOC119870447	transcript	XR_005356071.1	pseudogene	2	n.410+6115T>A
chr2	77259511	A	T	VQSRTrancheSNP99.90to100.00	T	intron_variant	MODIFIER	EIF4G3	EIF4G3	transcript	XM_038531720.1	protein_coding	1	c.-272+39484A>T
chr2	77259511	A	T	VQSRTrancheSNP99.90to100.00	T	intron_variant	MODIFIER	EIF4G3	EIF4G3	transcript	XM_038531722.1	protein_coding	1	c.-143+39484A>T
chr2	77259511	A	T	VQSRTrancheSNP99.90to100.00	T	intron_variant	MODIFIER	EIF4G3	EIF4G3	transcript	XM_038531710.1	protein_coding	1	c.46+38005A>T
chr2	77259511	A	T	VQSRTrancheSNP99.90to100.00	T	intron_variant	MODIFIER	EIF4G3	EIF4G3	transcript	XM_038531711.1	protein_coding	1	c.46+38005A>T
chr2	77259511	A	T	VQSRTrancheSNP99.90to100.00	T	intron_variant	MODIFIER	EIF4G3	EIF4G3	transcript	XM_038531712.1	protein_coding	1	c.46+38005A>T
chr2	77259511	A	T	VQSRTrancheSNP99.90to100.00	T	intron_variant	MODIFIER	EIF4G3	EIF4G3	transcript	XM_038531717.1	protein_coding	2	c.-372+35809A>T
chr2	77259511	A	T	VQSRTrancheSNP99.90to100.00	T	intron_variant	MODIFIER	EIF4G3	EIF4G3	transcript	XM_038531714.1	protein_coding	1	c.20+37883A>T
chr2	83706713	AGATGGACG	A	PASS	A	3_prime_UTR_variant	MODIFIER	LOC119870505	LOC119870505	transcript	XM_038529602.1	protein_coding	5	c.*125_*132delACGGATGG
chr2	83706713	AGATGGACG	A	PASS	A	upstream_gene_variant	MODIFIER	TNFRSF8	TNFRSF8	transcript	XM_038531983.1	protein_coding	-1	c.-4917_-4910delCGTCCATC
chr2	83706713	AGATGGACG	A	PASS	A	upstream_gene_variant	MODIFIER	TNFRSF8	TNFRSF8	transcript	XM_038531986.1	protein_coding	-1	c.-4917_-4910delCGTCCATC
chr2	83706713	AGATGGACG	A	PASS	A	upstream_gene_variant	MODIFIER	TNFRSF8	TNFRSF8	transcript	XM_038531987.1	protein_coding	-1	c.-4917_-4910delCGTCCATC
chr2	83706713	AGATGGACG	A	PASS	A	upstream_gene_variant	MODIFIER	TNFRSF8	TNFRSF8	transcript	XM_038531984.1	protein_coding	-1	c.-4917_-4910delCGTCCATC
chr2	83706713	AGATGGACG	A	PASS	A	upstream_gene_variant	MODIFIER	TNFRSF8	TNFRSF8	transcript	XM_038531985.1	protein_coding	-1	c.-4917_-4910delCGTCCATC
chr2	83724348	AC	A	PASS	A	intergenic_region	MODIFIER	LOC119870505-MIIP	LOC119870505-MIIP	intergenic_region	LOC119870505_3-MIIP_3		-1	n.83724349delC
chr2	84013793	G	T	PASS	T	intergenic_region	MODIFIER	DRAXIN-MAD2L2	DRAXIN-MAD2L2	intergenic_region	DRAXIN_3-MAD2L2_3		-1	n.84013793G>T
chr2	84472230	C	CA	PASS	CA	upstream_gene_variant	MODIFIER	TARDBP	TARDBP	transcript	XM_038532039.1	protein_coding	-1	c.-505_-504insT
chr2	84472230	C	CA	PASS	CA	upstream_gene_variant	MODIFIER	TARDBP	TARDBP	transcript	XR_005356200.1	pseudogene	-1	n.-376_-375insT
chr2	84472230	C	CA	PASS	CA	upstream_gene_variant	MODIFIER	TARDBP	TARDBP	transcript	XR_005356201.1	pseudogene	-1	n.-376_-375insT
chr2	84472230	C	CA	PASS	CA	upstream_gene_variant	MODIFIER	TARDBP	TARDBP	transcript	XM_038532040.1	protein_coding	-1	c.-505_-504insT
chr2	84472230	C	CA	PASS	CA	intergenic_region	MODIFIER	TARDBP-LOC119876036	TARDBP-LOC119876036	intergenic_region	TARDBP_3-LOC119876036		-1	n.84472230_84472231insA
chr2	84574434	GC	G	PASS	G	intergenic_region	MODIFIER	LOC119876036-LOC119870069_2	LOC119876036-LOC119870069_2	intergenic_region	LOC119876036-LOC119870069_2		-1	n.84574435delC
chr2	84587891	G	A	PASS	A	intergenic_region	MODIFIER	LOC119876036-LOC119870069_2	LOC119876036-LOC119870069_2	intergenic_region	LOC119876036-LOC119870069_2		-1	n.84587891G>A
chr3	82221	CGG	C	PASS	C	intergenic_region	MODIFIER	CHR_START-LOC119870962	CHR_START-LOC119870962	intergenic_region	CHR_START-LOC119870962_3		-1	n.82222_82223delGG
chr3	3332673	G	GCTCCCCTCCCCCAGGTGGGCGGACCCCGGT	PASS	GCTCCCCTCCCCCAGGTGGGCGGACCCCGGT	upstream_gene_variant	MODIFIER	LOC111095044	LOC111095044	transcript	XR_005356545.1	pseudogene	-1	n.-1783_-1782insACCGGGGTCCGCCCACCTGGGGGAGGGGAG
chr3	3332673	G	GCTCCCCTCCCCCAGGTGGGCGGACCCCGGT	PASS	GCTCCCCTCCCCCAGGTGGGCGGACCCCGGT	upstream_gene_variant	MODIFIER	LOC111095044	LOC111095044	transcript	XR_005356544.1	pseudogene	-1	n.-1788_-1787insACCGGGGTCCGCCCACCTGGGGGAGGGGAG
chr3	3332673	G	GCTCCCCTCCCCCAGGTGGGCGGACCCCGGT	PASS	GCTCCCCTCCCCCAGGTGGGCGGACCCCGGT	intergenic_region	MODIFIER	LOC111095044-LOC111095048	LOC111095044-LOC111095048	intergenic_region	LOC111095044_3-LOC111095048_3		-1	n.3332673_3332674insCTCCCCTCCCCCAGGTGGGCGGACCCCGGT
chr3	3926803	C	T	PASS	T	intron_variant	MODIFIER	FBXL17	FBXL17	transcript	XM_038532171.1	protein_coding	6	c.1653-12412C>T
chr3	11504537	G	A	PASS	A	intron_variant	MODIFIER	LOC119871074	LOC119871074	transcript	XR_005356620.1	pseudogene	3	n.540+11423C>T
chr3	11504538	C	A	PASS	A	intron_variant	MODIFIER	LOC119871074	LOC119871074	transcript	XR_005356620.1	pseudogene	3	n.540+11422G>T
chr3	11504539	C	A	PASS	A	intron_variant	MODIFIER	LOC119871074	LOC119871074	transcript	XR_005356620.1	pseudogene	3	n.540+11421G>T
chr3	11504624	G	C	PASS	C	intron_variant	MODIFIER	LOC119871074	LOC119871074	transcript	XR_005356620.1	pseudogene	3	n.540+11336C>G
chr3	12503903	TTTTG	T	PASS	T	intergenic_region	MODIFIER	LOC119870736-RIOK2	LOC119870736-RIOK2	intergenic_region	LOC119870736_3-RIOK2_3		-1	n.12503904_12503907delTTTG
chr3	17059944	G	C	PASS	C	intergenic_region	MODIFIER	LOC111095137-LOC119871123	LOC111095137-LOC119871123	intergenic_region	LOC111095137_3-LOC119871123_3		-1	n.17059944G>C
chr3	50124383	T	C	PASS	C	intergenic_region	MODIFIER	LOC111095372-LOC479033	LOC111095372-LOC479033	intergenic_region	LOC111095372_3-LOC479033_3		-1	n.50124383T>C
chr3	53164283	G	T	PASS	T	3_prime_UTR_variant	MODIFIER	PEX11A	PEX11A	transcript	XM_038532844.1	protein_coding	3	c.*439C>A
chr3	53164283	G	T	PASS	T	3_prime_UTR_variant	MODIFIER	PEX11A	PEX11A	transcript	XM_038532845.1	protein_coding	2	c.*439C>A
chr3	53164283	G	T	PASS	T	upstream_gene_variant	MODIFIER	PLIN1	PLIN1	transcript	XM_038532835.1	protein_coding	-1	c.-5085C>A
chr3	53853258	G	A	PASS	A	intron_variant	MODIFIER	FURIN	FURIN	transcript	XM_038532884.1	protein_coding	1	c.-160-980C>T
chr3	54017281	C	T	PASS	T	downstream_gene_variant	MODIFIER	LOC102156686	LOC102156686	transcript	XR_005357083.1	pseudogene	-1	n.*2573C>T
chr3	54017281	C	T	PASS	T	intron_variant	MODIFIER	LOC102156686	LOC102156686	transcript	XR_005357084.1	pseudogene	3	n.503-4789C>T
chr3	54017281	C	T	PASS	T	intron_variant	MODIFIER	LOC102156686	LOC102156686	transcript	XR_005357086.1	pseudogene	3	n.503-4789C>T
chr3	54017281	C	T	PASS	T	non_coding_transcript_exon_variant	MODIFIER	LOC102156686	LOC102156686	transcript	XR_005357085.1	pseudogene	4	n.2131C>T
chr3	54138504	C	T	PASS	T	intron_variant	MODIFIER	CRTC3	CRTC3	transcript	XM_038532890.1	protein_coding	1	c.133-1919G>A
chr3	54138504	C	T	PASS	T	intron_variant	MODIFIER	CRTC3	CRTC3	transcript	XM_038532891.1	protein_coding	1	c.133-1919G>A
chr3	54138504	C	T	PASS	T	intron_variant	MODIFIER	CRTC3	CRTC3	transcript	XM_038532892.1	protein_coding	1	c.133-1919G>A
chr3	54138504	C	T	PASS	T	intron_variant	MODIFIER	CRTC3	CRTC3	transcript	XM_038532893.1	protein_coding	1	c.133-1919G>A
chr3	54722188	A	T	PASS	T	intron_variant	MODIFIER	PDE8A	PDE8A	transcript	XM_038532922.1	protein_coding	1	c.198+19060A>T
chr3	54722188	A	T	PASS	T	intron_variant	MODIFIER	PDE8A	PDE8A	transcript	XM_038532923.1	protein_coding	1	c.198+19060A>T
chr3	54722188	A	T	PASS	T	intron_variant	MODIFIER	PDE8A	PDE8A	transcript	XM_038532924.1	protein_coding	1	c.198+19060A>T
chr3	55257509	C	T	PASS	T	intron_variant	MODIFIER	LOC119871214	LOC119871214	transcript	XR_005357095.1	pseudogene	3	n.3764+1166G>A
chr3	55257509	C	T	PASS	T	intron_variant	MODIFIER	LOC119871214	LOC119871214	transcript	XR_005357093.1	pseudogene	3	n.3764+1166G>A
chr3	55257509	C	T	PASS	T	intron_variant	MODIFIER	LOC119871214	LOC119871214	transcript	XR_005357094.1	pseudogene	3	n.3764+1166G>A
chr3	56724008	A	G	PASS	G	intron_variant	MODIFIER	LOC111095236	LOC111095236	transcript	XR_005357113.1	pseudogene	2	n.973-4778A>G
chr3	56724008	A	G	PASS	G	intron_variant	MODIFIER	LOC111095236	LOC111095236	transcript	XR_005357112.1	pseudogene	2	n.882-4778A>G
chr3	56724008	A	G	PASS	G	intron_variant	MODIFIER	LOC111095236	LOC111095236	transcript	XR_005357114.1	pseudogene	2	n.882-6797A>G
chr3	56729187	TTTCTA	T	PASS	T	intron_variant	MODIFIER	LOC111095236	LOC111095236	transcript	XR_005357114.1	pseudogene	2	n.882-1612_882-1608delTTCTA
chr3	56729187	TTTCTA	T	PASS	T	non_coding_transcript_exon_variant	MODIFIER	LOC111095236	LOC111095236	transcript	XR_005357113.1	pseudogene	3	n.1380_1384delTTCTA
chr3	56729187	TTTCTA	T	PASS	T	non_coding_transcript_exon_variant	MODIFIER	LOC111095236	LOC111095236	transcript	XR_005357112.1	pseudogene	3	n.1289_1293delTTCTA
chr3	56958605	C	T	PASS	T	intron_variant	MODIFIER	IL16	IL16	transcript	XM_038532985.1	protein_coding	15	c.3454-523G>A
chr3	56958605	C	T	PASS	T	intron_variant	MODIFIER	IL16	IL16	transcript	XM_038532987.1	protein_coding	15	c.3313-523G>A
chr3	56958605	C	T	PASS	T	intron_variant	MODIFIER	IL16	IL16	transcript	XM_038532988.1	protein_coding	15	c.3313-523G>A
chr3	56958605	C	T	PASS	T	intron_variant	MODIFIER	IL16	IL16	transcript	XM_038532986.1	protein_coding	15	c.3454-523G>A
chr3	57254465	CCACT	C	PASS	C	intron_variant	MODIFIER	CEMIP	CEMIP	transcript	XM_038532995.1	protein_coding	6	c.797+700_797+703delAGTG
chr3	57254465	CCACT	C	PASS	C	intron_variant	MODIFIER	CEMIP	CEMIP	transcript	XM_038532996.1	protein_coding	6	c.794+700_794+703delAGTG
chr3	57591090	G	A	PASS	A	intron_variant	MODIFIER	ARNT2	ARNT2	transcript	XM_038532998.1	protein_coding	4	c.392+404C>T
chr3	57591090	G	A	PASS	A	intron_variant	MODIFIER	ARNT2	ARNT2	transcript	XM_038533001.1	protein_coding	3	c.161+404C>T
chr3	57591090	G	A	PASS	A	intron_variant	MODIFIER	ARNT2	ARNT2	transcript	XM_038533003.1	protein_coding	3	c.161+404C>T
chr3	57591090	G	A	PASS	A	intron_variant	MODIFIER	ARNT2	ARNT2	transcript	XM_038533002.1	protein_coding	3	c.161+404C>T
chr3	57591090	G	A	PASS	A	intron_variant	MODIFIER	ARNT2	ARNT2	transcript	XM_038533000.1	protein_coding	3	c.194+404C>T
chr3	57591090	G	A	PASS	A	intron_variant	MODIFIER	ARNT2	ARNT2	transcript	XM_038532999.1	protein_coding	4	c.392+404C>T
chr3	57803569	C	A	PASS	A	intron_variant	MODIFIER	FAH	FAH	transcript	XM_038533006.1	protein_coding	5	c.456-54G>T
chr3	57898381	A	G	PASS	G	intergenic_region	MODIFIER	ZFAND6-BCL2A1	ZFAND6-BCL2A1	intergenic_region	ZFAND6_3-BCL2A1_3		-1	n.57898381A>G
chr3	59309303	AC	A	PASS	A	upstream_gene_variant	MODIFIER	LOC102151796	LOC102151796	transcript	XM_038533695.1	protein_coding	-1	c.-1983delC
chr3	59309303	AC	A	PASS	A	intron_variant	MODIFIER	LOC119871224	LOC119871224	transcript	XR_005357156.1	pseudogene	1	n.291+1216delG
chr3	59325572	C	G	PASS	G	intron_variant	MODIFIER	LOC106558629	LOC106558629	transcript	XR_005357153.1	pseudogene	1	n.549-5807G>C
chr3	59325572	C	G	PASS	G	intron_variant	MODIFIER	S100P	S100P	transcript	XM_038533074.1	protein_coding	1	c.138+87C>G
chr3	59325572	C	G	PASS	G	intron_variant	MODIFIER	LOC106558629	LOC106558629	transcript	XR_005357152.1	pseudogene	1	n.532-5807G>C
chr3	59325572	C	G	PASS	G	intron_variant	MODIFIER	LOC106558629	LOC106558629	transcript	XR_005357151.1	pseudogene	1	n.538-5807G>C
chr3	59325572	C	G	PASS	G	intron_variant	MODIFIER	LOC106558629	LOC106558629	transcript	XR_005357154.1	pseudogene	1	n.549-5807G>C
chr3	59325572	C	G	PASS	G	intron_variant	MODIFIER	LOC106558629	LOC106558629	transcript	XR_005357155.1	pseudogene	1	n.549-5807G>C
chr3	59999969	G	A	PASS	A	downstream_gene_variant	MODIFIER	LOC102152695	LOC102152695	transcript	XR_005357158.1	pseudogene	-1	n.*4802C>T
chr3	59999969	G	A	PASS	A	intron_variant	MODIFIER	SORCS2	SORCS2	transcript	XM_038533096.1	protein_coding	2	c.594-25614G>A
chr3	61764879	C	T	PASS	T	intron_variant	MODIFIER	GRK4	GRK4	transcript	XM_038533187.1	protein_coding	15	c.1780-214G>A
chr3	61764879	C	T	PASS	T	intron_variant	MODIFIER	GRK4	GRK4	transcript	XM_038533192.1	protein_coding	15	c.1693-214G>A
chr3	61764879	C	T	PASS	T	intron_variant	MODIFIER	GRK4	GRK4	transcript	XM_038533198.1	protein_coding	14	c.1555-214G>A
chr3	61764879	C	T	PASS	T	intron_variant	MODIFIER	GRK4	GRK4	transcript	XM_038533188.1	protein_coding	16	c.1780-214G>A
chr3	61764879	C	T	PASS	T	intron_variant	MODIFIER	GRK4	GRK4	transcript	XM_038533191.1	protein_coding	14	c.1702-214G>A
chr3	61764879	C	T	PASS	T	intron_variant	MODIFIER	GRK4	GRK4	transcript	XM_038533193.1	protein_coding	14	c.1690-214G>A
chr3	61764879	C	T	PASS	T	intron_variant	MODIFIER	GRK4	GRK4	transcript	XM_038533196.1	protein_coding	14	c.1639-214G>A
chr3	61764879	C	T	PASS	T	intron_variant	MODIFIER	GRK4	GRK4	transcript	XM_038533194.1	protein_coding	14	c.1642-214G>A
chr3	61764879	C	T	PASS	T	intron_variant	MODIFIER	GRK4	GRK4	transcript	XM_038533195.1	protein_coding	14	c.1642-214G>A
chr3	61764879	C	T	PASS	T	intron_variant	MODIFIER	GRK4	GRK4	transcript	XM_038533190.1	protein_coding	16	c.1717-214G>A
chr3	61764879	C	T	PASS	T	intron_variant	MODIFIER	GRK4	GRK4	transcript	XM_038533189.1	protein_coding	15	c.1780-150G>A
chr3	61764879	C	T	PASS	T	intron_variant	MODIFIER	GRK4	GRK4	transcript	XM_038533197.1	protein_coding	14	c.1642-150G>A
chr3	66484526	G	A	PASS	A	intron_variant	MODIFIER	LOC111095266	LOC111095266	transcript	XR_005357225.1	pseudogene	3	n.434+17323C>T
chr3	66484526	G	A	PASS	A	intron_variant	MODIFIER	LOC111095266	LOC111095266	transcript	XR_005357226.1	pseudogene	2	n.352-35368C>T
chr3	71483102	GA	G	PASS	G	intron_variant	MODIFIER	EVC2	EVC2	transcript	XM_038533701.1	protein_coding	6	c.927+1496delT
chr3	71483114	G	C	PASS	C	intron_variant	MODIFIER	EVC2	EVC2	transcript	XM_038533701.1	protein_coding	6	c.927+1485C>G
chr3	71483119	A	G	PASS	G	intron_variant	MODIFIER	EVC2	EVC2	transcript	XM_038533701.1	protein_coding	6	c.927+1480T>C
chr3	78351697	C	CA	PASS	CA	intergenic_region	MODIFIER	LOC100685522-LOC119871408	LOC100685522-LOC119871408	intergenic_region	LOC100685522_3-LOC119871408_3		-1	n.78351697_78351698insA
chr3	78803734	GTCTCTGTC	G	PASS	G	intergenic_region	MODIFIER	LOC111095393-LOC100685608	LOC111095393-LOC100685608	intergenic_region	LOC111095393_3-LOC100685608_3		-1	n.78803735_78803742delTCTCTGTC
chr4	46230	G	A	PASS	A	intergenic_region	MODIFIER	CHR_START-LOC119876234	CHR_START-LOC119876234	intergenic_region	CHR_START-LOC119876234		-1	n.46230G>A
chr4	327937	T	A	PASS	A	intergenic_region	MODIFIER	LOC119876175-LOC111095415	LOC119876175-LOC111095415	intergenic_region	LOC119876175-LOC111095415_3		-1	n.327937T>A
chr4	335077	C	T	PASS	T	intron_variant	MODIFIER	LOC111095415	LOC111095415	transcript	XR_005357687.1	pseudogene	3	n.4600-229G>A
chr4	335077	C	T	PASS	T	intron_variant	MODIFIER	LOC111095415	LOC111095415	transcript	XR_005357686.1	pseudogene	3	n.4599+878G>A
chr4	335077	C	T	PASS	T	intron_variant	MODIFIER	LOC111095415	LOC111095415	transcript	XR_005357688.1	pseudogene	3	n.4599+878G>A
chr4	335077	C	T	PASS	T	intron_variant	MODIFIER	LOC111095415	LOC111095415	transcript	XR_005357689.1	pseudogene	3	n.4600-229G>A
chr4	335077	C	T	PASS	T	intron_variant	MODIFIER	LOC111095415	LOC111095415	transcript	XR_005357690.1	pseudogene	3	n.4600-229G>A
chr4	388019	GGGGTTAGGCAATCA	G	PASS	G	3_prime_UTR_variant	MODIFIER	IFIT2	IFIT2	transcript	XM_038533770.1	protein_coding	2	c.*674_*687delAGGCAATCAGGGTT
chr4	504882	G	A	PASS	A	intron_variant	MODIFIER	LOC119876184	LOC119876184	transcript	XM_038533783.1	protein_coding	1	c.-48-5379G>A
chr4	504882	G	A	PASS	A	intron_variant	MODIFIER	LOC119876184	LOC119876184	transcript	XM_038533784.1	protein_coding	1	c.-48-5379G>A
chr4	504882	G	A	PASS	A	intron_variant	MODIFIER	LOC119876184	LOC119876184	transcript	XR_005357692.1	pseudogene	1	n.680-5379G>A
chr4	512272	T	A	PASS	A	intron_variant	MODIFIER	LOC119876184	LOC119876184	transcript	XM_038533783.1	protein_coding	2	c.15+1949T>A
chr4	512272	T	A	PASS	A	intron_variant	MODIFIER	LOC119876184	LOC119876184	transcript	XM_038533784.1	protein_coding	2	c.15+1949T>A
chr4	512272	T	A	PASS	A	intron_variant	MODIFIER	LOC119876184	LOC119876184	transcript	XR_005357692.1	pseudogene	2	n.742+1949T>A
chr4	520677	A	T	PASS	T	intron_variant	MODIFIER	LOC119876184	LOC119876184	transcript	XM_038533783.1	protein_coding	2	c.16-9732A>T
chr4	520677	A	T	PASS	T	intron_variant	MODIFIER	LOC119876184	LOC119876184	transcript	XM_038533784.1	protein_coding	2	c.16-9732A>T
chr4	520677	A	T	PASS	T	intron_variant	MODIFIER	LOC119876184	LOC119876184	transcript	XR_005357692.1	pseudogene	2	n.743-10119A>T
chr4	598903	T	A	PASS	A	intragenic_variant	MODIFIER	LOC606894	LOC606894	gene_variant	LOC606894_3		-1	n.598903T>A
chr4	735160	C	A	PASS	A	intron_variant	MODIFIER	LOC119871425	LOC119871425	transcript	XM_038533788.1	protein_coding	3	c.45+2757C>A
chr4	766408	C	T	PASS	T	intron_variant	MODIFIER	LOC119871425	LOC119871425	transcript	XM_038533788.1	protein_coding	5	c.287-7232C>T
chr4	955131	G	A	PASS	A	intron_variant	MODIFIER	CHRM3	CHRM3	transcript	XM_038533805.1	protein_coding	2	c.-48-22357C>T
chr4	955131	G	A	PASS	A	intron_variant	MODIFIER	CHRM3	CHRM3	transcript	XM_038533795.1	protein_coding	4	c.-48-22357C>T
chr4	955131	G	A	PASS	A	intron_variant	MODIFIER	CHRM3	CHRM3	transcript	XM_038533796.1	protein_coding	4	c.-20+51368C>T
chr4	955131	G	A	PASS	A	intron_variant	MODIFIER	CHRM3	CHRM3	transcript	XM_038533797.1	protein_coding	6	c.-48-22357C>T
chr4	955131	G	A	PASS	A	intron_variant	MODIFIER	CHRM3	CHRM3	transcript	XM_038533798.1	protein_coding	5	c.-19-68269C>T
chr4	955131	G	A	PASS	A	intron_variant	MODIFIER	CHRM3	CHRM3	transcript	XM_038533799.1	protein_coding	6	c.-48-22357C>T
chr4	955131	G	A	PASS	A	intron_variant	MODIFIER	CHRM3	CHRM3	transcript	XM_038533800.1	protein_coding	4	c.-19-68269C>T
chr4	955131	G	A	PASS	A	intron_variant	MODIFIER	CHRM3	CHRM3	transcript	XM_038533801.1	protein_coding	5	c.-48-22357C>T
chr4	955131	G	A	PASS	A	intron_variant	MODIFIER	CHRM3	CHRM3	transcript	XM_038533802.1	protein_coding	5	c.-19-68269C>T
chr4	955131	G	A	PASS	A	intron_variant	MODIFIER	CHRM3	CHRM3	transcript	XM_038533803.1	protein_coding	5	c.-48-22357C>T
chr4	955131	G	A	PASS	A	intron_variant	MODIFIER	CHRM3	CHRM3	transcript	XM_038533804.1	protein_coding	4	c.-48-22357C>T
chr4	1070229	G	T	PASS	T	intron_variant	MODIFIER	CHRM3	CHRM3	transcript	XM_038533797.1	protein_coding	5	c.-217+48690C>A
chr4	1070229	G	T	PASS	T	intron_variant	MODIFIER	CHRM3	CHRM3	transcript	XM_038533798.1	protein_coding	5	c.-20+48690C>A
chr4	1070229	G	T	PASS	T	intron_variant	MODIFIER	CHRM3	CHRM3	transcript	XM_038533799.1	protein_coding	5	c.-217+48797C>A
chr4	1070229	G	T	PASS	T	intron_variant	MODIFIER	CHRM3	CHRM3	transcript	XM_038533800.1	protein_coding	4	c.-20+50951C>A
chr4	1070229	G	T	PASS	T	intron_variant	MODIFIER	CHRM3	CHRM3	transcript	XM_038533801.1	protein_coding	5	c.-49+48797C>A
chr4	1070229	G	T	PASS	T	intron_variant	MODIFIER	CHRM3	CHRM3	transcript	XM_038533802.1	protein_coding	5	c.-20+48797C>A
chr4	1070229	G	T	PASS	T	intron_variant	MODIFIER	CHRM3	CHRM3	transcript	XM_038533803.1	protein_coding	4	c.-217+50951C>A
chr4	1070229	G	T	PASS	T	intron_variant	MODIFIER	CHRM3	CHRM3	transcript	XM_038533804.1	protein_coding	4	c.-49+50951C>A
chr4	1087311	G	A	PASS	A	intron_variant	MODIFIER	CHRM3	CHRM3	transcript	XM_038533797.1	protein_coding	5	c.-217+31608C>T
chr4	1087311	G	A	PASS	A	intron_variant	MODIFIER	CHRM3	CHRM3	transcript	XM_038533798.1	protein_coding	5	c.-20+31608C>T
chr4	1087311	G	A	PASS	A	intron_variant	MODIFIER	CHRM3	CHRM3	transcript	XM_038533799.1	protein_coding	5	c.-217+31715C>T
chr4	1087311	G	A	PASS	A	intron_variant	MODIFIER	CHRM3	CHRM3	transcript	XM_038533800.1	protein_coding	4	c.-20+33869C>T
chr4	1087311	G	A	PASS	A	intron_variant	MODIFIER	CHRM3	CHRM3	transcript	XM_038533801.1	protein_coding	5	c.-49+31715C>T
chr4	1087311	G	A	PASS	A	intron_variant	MODIFIER	CHRM3	CHRM3	transcript	XM_038533802.1	protein_coding	5	c.-20+31715C>T
chr4	1087311	G	A	PASS	A	intron_variant	MODIFIER	CHRM3	CHRM3	transcript	XM_038533803.1	protein_coding	4	c.-217+33869C>T
chr4	1087311	G	A	PASS	A	intron_variant	MODIFIER	CHRM3	CHRM3	transcript	XM_038533804.1	protein_coding	4	c.-49+33869C>T
chr4	1089645	A	T	PASS	T	intron_variant	MODIFIER	CHRM3	CHRM3	transcript	XM_038533797.1	protein_coding	5	c.-217+29274T>A
chr4	1089645	A	T	PASS	T	intron_variant	MODIFIER	CHRM3	CHRM3	transcript	XM_038533798.1	protein_coding	5	c.-20+29274T>A
chr4	1089645	A	T	PASS	T	intron_variant	MODIFIER	CHRM3	CHRM3	transcript	XM_038533799.1	protein_coding	5	c.-217+29381T>A
chr4	1089645	A	T	PASS	T	intron_variant	MODIFIER	CHRM3	CHRM3	transcript	XM_038533800.1	protein_coding	4	c.-20+31535T>A
chr4	1089645	A	T	PASS	T	intron_variant	MODIFIER	CHRM3	CHRM3	transcript	XM_038533801.1	protein_coding	5	c.-49+29381T>A
chr4	1089645	A	T	PASS	T	intron_variant	MODIFIER	CHRM3	CHRM3	transcript	XM_038533802.1	protein_coding	5	c.-20+29381T>A
chr4	1089645	A	T	PASS	T	intron_variant	MODIFIER	CHRM3	CHRM3	transcript	XM_038533803.1	protein_coding	4	c.-217+31535T>A
chr4	1089645	A	T	PASS	T	intron_variant	MODIFIER	CHRM3	CHRM3	transcript	XM_038533804.1	protein_coding	4	c.-49+31535T>A
chr4	1100502	A	AC	PASS	AC	intron_variant	MODIFIER	CHRM3	CHRM3	transcript	XM_038533797.1	protein_coding	5	c.-217+18416_-217+18417insG
chr4	1100502	A	AC	PASS	AC	intron_variant	MODIFIER	CHRM3	CHRM3	transcript	XM_038533798.1	protein_coding	5	c.-20+18416_-20+18417insG
chr4	1100502	A	AC	PASS	AC	intron_variant	MODIFIER	CHRM3	CHRM3	transcript	XM_038533799.1	protein_coding	5	c.-217+18523_-217+18524insG
chr4	1100502	A	AC	PASS	AC	intron_variant	MODIFIER	CHRM3	CHRM3	transcript	XM_038533800.1	protein_coding	4	c.-20+20677_-20+20678insG
chr4	1100502	A	AC	PASS	AC	intron_variant	MODIFIER	CHRM3	CHRM3	transcript	XM_038533801.1	protein_coding	5	c.-49+18523_-49+18524insG
chr4	1100502	A	AC	PASS	AC	intron_variant	MODIFIER	CHRM3	CHRM3	transcript	XM_038533802.1	protein_coding	5	c.-20+18523_-20+18524insG
chr4	1100502	A	AC	PASS	AC	intron_variant	MODIFIER	CHRM3	CHRM3	transcript	XM_038533803.1	protein_coding	4	c.-217+20677_-217+20678insG
chr4	1100502	A	AC	PASS	AC	intron_variant	MODIFIER	CHRM3	CHRM3	transcript	XM_038533804.1	protein_coding	4	c.-49+20677_-49+20678insG
chr4	1392575	T	C	PASS	C	intergenic_region	MODIFIER	CHRM3-LOC100855447	CHRM3-LOC100855447	intergenic_region	CHRM3_3-LOC100855447_3		-1	n.1392575T>C
chr4	1392576	A	T	PASS	T	intergenic_region	MODIFIER	CHRM3-LOC100855447	CHRM3-LOC100855447	intergenic_region	CHRM3_3-LOC100855447_3		-1	n.1392576A>T
chr4	1544024	G	T	PASS	T	intergenic_region	MODIFIER	LOC100855447-LOC111095680	LOC100855447-LOC111095680	intergenic_region	LOC100855447_3-LOC111095680_3		-1	n.1544024G>T
chr4	1616005	TA	T	PASS	T	intergenic_region	MODIFIER	LOC100855447-LOC111095680	LOC100855447-LOC111095680	intergenic_region	LOC100855447_3-LOC111095680_3		-1	n.1616006delA
chr4	1670155	G	A	PASS	A	intergenic_region	MODIFIER	LOC119871419-LOC119871603	LOC119871419-LOC119871603	intergenic_region	LOC119871419_3-LOC119871603_3		-1	n.1670155G>A
chr4	1924359	A	T	PASS	T	intron_variant	MODIFIER	LOC119871430	LOC119871430	transcript	XR_005357706.1	pseudogene	4	n.624+10660A>T
chr4	2090363	G	A	PASS	A	intron_variant	MODIFIER	LOC102151819	LOC102151819	transcript	XR_005357715.1	pseudogene	7	n.1825-27512C>T
chr4	2090363	G	A	PASS	A	intron_variant	MODIFIER	LOC102151819	LOC102151819	transcript	XR_005357721.1	pseudogene	6	n.1695-27512C>T
chr4	2110072	A	T	PASS	T	downstream_gene_variant	MODIFIER	LOC102151819	LOC102151819	transcript	XR_005357712.1	pseudogene	-1	n.*3712T>A
chr4	2110072	A	T	PASS	T	downstream_gene_variant	MODIFIER	LOC102151819	LOC102151819	transcript	XR_005357713.1	pseudogene	-1	n.*3712T>A
chr4	2110072	A	T	PASS	T	downstream_gene_variant	MODIFIER	LOC102151819	LOC102151819	transcript	XR_005357714.1	pseudogene	-1	n.*3712T>A
chr4	2110072	A	T	PASS	T	intron_variant	MODIFIER	LOC102151819	LOC102151819	transcript	XR_005357715.1	pseudogene	7	n.1824+31527T>A
chr4	2110072	A	T	PASS	T	intron_variant	MODIFIER	LOC102151819	LOC102151819	transcript	XR_005357721.1	pseudogene	6	n.1694+45980T>A
chr4	2125213	C	A	PASS	A	intron_variant	MODIFIER	LOC102151819	LOC102151819	transcript	XR_005357711.1	pseudogene	9	n.2064-8803G>T
chr4	2125213	C	A	PASS	A	intron_variant	MODIFIER	LOC102151819	LOC102151819	transcript	XR_005357715.1	pseudogene	7	n.1824+16386G>T
chr4	2125213	C	A	PASS	A	intron_variant	MODIFIER	LOC102151819	LOC102151819	transcript	XR_005357721.1	pseudogene	6	n.1694+30839G>T
chr4	2125213	C	A	PASS	A	intron_variant	MODIFIER	LOC102151819	LOC102151819	transcript	XR_005357712.1	pseudogene	8	n.1936-8803G>T
chr4	2125213	C	A	PASS	A	intron_variant	MODIFIER	LOC102151819	LOC102151819	transcript	XR_005357713.1	pseudogene	7	n.1825-485G>T
chr4	2125213	C	A	PASS	A	intron_variant	MODIFIER	LOC102151819	LOC102151819	transcript	XR_005357714.1	pseudogene	7	n.1825-8803G>T
chr4	2125213	C	A	PASS	A	intron_variant	MODIFIER	LOC102151819	LOC102151819	transcript	XR_005357710.1	pseudogene	9	n.1046-8803G>T
chr4	2125213	C	A	PASS	A	intron_variant	MODIFIER	LOC102151819	LOC102151819	transcript	XR_005357717.1	pseudogene	9	n.947-8803G>T
chr4	2125213	C	A	PASS	A	intron_variant	MODIFIER	LOC102151819	LOC102151819	transcript	XR_005357718.1	pseudogene	6	n.730-8803G>T
chr4	2125213	C	A	PASS	A	intron_variant	MODIFIER	LOC102151819	LOC102151819	transcript	XR_005357719.1	pseudogene	7	n.1824-8803G>T
chr4	2125213	C	A	PASS	A	intron_variant	MODIFIER	LOC102151819	LOC102151819	transcript	XR_005357722.1	pseudogene	5	n.618-8803G>T
chr4	2125213	C	A	PASS	A	intron_variant	MODIFIER	LOC102151819	LOC102151819	transcript	XR_005357720.1	pseudogene	6	n.1695-485G>T
chr4	2386521	G	A	PASS	A	intron_variant	MODIFIER	LOC111095689	LOC111095689	transcript	XR_005357514.1	pseudogene	1	n.135+1125C>T
chr4	2386521	G	A	PASS	A	intron_variant	MODIFIER	LOC111095689	LOC111095689	transcript	XR_005357515.1	pseudogene	1	n.135+1125C>T
chr4	3319670	A	T	PASS	T	intron_variant	MODIFIER	RYR2	RYR2	transcript	XM_038533814.1	protein_coding	1	c.49-39732T>A
chr4	3319670	A	T	PASS	T	intron_variant	MODIFIER	RYR2	RYR2	transcript	XM_038533815.1	protein_coding	1	c.49-39732T>A
chr4	3319670	A	T	PASS	T	intron_variant	MODIFIER	RYR2	RYR2	transcript	XM_038533816.1	protein_coding	1	c.49-39732T>A
chr4	3319670	A	T	PASS	T	intron_variant	MODIFIER	RYR2	RYR2	transcript	XM_038533817.1	protein_coding	1	c.49-39732T>A
chr4	3319670	A	T	PASS	T	intron_variant	MODIFIER	RYR2	RYR2	transcript	XM_038533818.1	protein_coding	1	c.49-39732T>A
chr4	4080170	G	A	PASS	A	upstream_gene_variant	MODIFIER	ERO1B	ERO1B	transcript	XM_038533836.1	protein_coding	-1	c.-1129G>A
chr4	4080170	G	A	PASS	A	intergenic_region	MODIFIER	LOC100687771-ERO1B	LOC100687771-ERO1B	intergenic_region	LOC100687771_3-ERO1B_3		-1	n.4080170G>A
chr4	4216448	AT	A	PASS	A	intron_variant	MODIFIER	GPR137B	GPR137B	transcript	XM_038533837.1	protein_coding	1	c.409-462delA
chr4	4216448	AT	A	PASS	A	intron_variant	MODIFIER	GPR137B	GPR137B	transcript	XR_005357740.1	pseudogene	1	n.429-462delA
chr4	5217177	C	G	PASS	G	upstream_gene_variant	MODIFIER	LOC106558654	LOC106558654	transcript	XR_005357524.1	pseudogene	-1	n.-4214G>C
chr4	5217177	C	G	PASS	G	upstream_gene_variant	MODIFIER	LOC100687994	LOC100687994	transcript	XR_005357752.1	pseudogene	-1	n.-1497C>G
chr4	5217177	C	G	PASS	G	upstream_gene_variant	MODIFIER	LOC106558654	LOC106558654	transcript	XR_005357522.1	pseudogene	-1	n.-4214G>C
chr4	5217177	C	G	PASS	G	intergenic_region	MODIFIER	LOC106558654-LOC100687994	LOC106558654-LOC100687994	intergenic_region	LOC106558654_3-LOC100687994_3		-1	n.5217177C>G
chr4	5704014	ACT	A	PASS	A	intergenic_region	MODIFIER	LOC106558664-TARBP1	LOC106558664-TARBP1	intergenic_region	LOC106558664_3-TARBP1_3		-1	n.5704015_5704016delCT
chr4	7073237	G	A	PASS	A	intron_variant	MODIFIER	PCNX2	PCNX2	transcript	XM_038533888.1	protein_coding	32	c.5771-1139G>A
chr4	7073237	G	A	PASS	A	intron_variant	MODIFIER	PCNX2	PCNX2	transcript	XM_038533889.1	protein_coding	29	c.5396-1139G>A
chr4	7217098	G	T	PASS	T	intergenic_region	MODIFIER	LOC119871610-LOC111095435	LOC119871610-LOC111095435	intergenic_region	LOC119871610_3-LOC111095435_3		-1	n.7217098G>T
chr4	8262789	G	C	PASS	C	intergenic_region	MODIFIER	DISC1-LOC119876187	DISC1-LOC119876187	intergenic_region	DISC1_3-LOC119876187		-1	n.8262789G>C
chr4	9958091	T	C	PASS	C	intergenic_region	MODIFIER	LOC119871447-URB2	LOC119871447-URB2	intergenic_region	LOC119871447_3-URB2_3		-1	n.9958091T>C
chr4	10083400	G	A	PASS	A	upstream_gene_variant	MODIFIER	LOC102152610	LOC102152610	transcript	XR_005357813.1	pseudogene	-1	n.-2719C>T
chr4	10083400	G	A	PASS	A	intron_variant	MODIFIER	LOC102152610	LOC102152610	transcript	XR_005357812.1	pseudogene	2	n.587+2575C>T
chr4	10083400	G	A	PASS	A	intron_variant	MODIFIER	LOC102152610	LOC102152610	transcript	XR_005357814.1	pseudogene	2	n.565+2575C>T
chr4	10771588	T	C	PASS	C	intergenic_region	MODIFIER	LOC111095697-RHOU	LOC111095697-RHOU	intergenic_region	LOC111095697_3-RHOU_3		-1	n.10771588T>C
chr4	10918201	G	A	PASS	A	upstream_gene_variant	MODIFIER	LOC119876252	LOC119876252	transcript	XR_005358796.1	rRNA	-1	n.-797G>A
chr4	10918201	G	A	PASS	A	upstream_gene_variant	MODIFIER	LOC119876251	LOC119876251	transcript	XR_005358795.1	rRNA	-1	n.-2517G>A
chr4	10918201	G	A	PASS	A	downstream_gene_variant	MODIFIER	LOC119876253	LOC119876253	transcript	XR_005358797.1	rRNA	-1	n.*4243G>A
chr4	10918201	G	A	PASS	A	downstream_gene_variant	MODIFIER	LOC119876241	LOC119876241	transcript	XR_005358785.1	rRNA	-1	n.*2555G>A
chr4	10918201	G	A	PASS	A	intergenic_region	MODIFIER	LOC119876263-LOC119876252	LOC119876263-LOC119876252	intergenic_region	LOC119876263-LOC119876252		-1	n.10918201G>A
chr4	11381389	T	A	PASS	A	intergenic_region	MODIFIER	LOC100685052_2-BICC1	LOC100685052_2-BICC1	intergenic_region	LOC100685052_2-BICC1_3		-1	n.11381389T>A
chr4	11974084	C	T	PASS	T	intron_variant	MODIFIER	LOC102154651	LOC102154651	transcript	XR_005357844.1	pseudogene	1	n.96+161C>T
chr4	12321654	A	T	PASS	T	intergenic_region	MODIFIER	FAM13C-LOC111095700	FAM13C-LOC111095700	intergenic_region	FAM13C_3-LOC111095700_3		-1	n.12321654A>T
chr4	12333052	TA	T	PASS	T	intergenic_region	MODIFIER	FAM13C-LOC111095700	FAM13C-LOC111095700	intergenic_region	FAM13C_3-LOC111095700_3		-1	n.12333053delA
chr4	12670832	C	T	PASS	T	intron_variant	MODIFIER	CCDC6	CCDC6	transcript	XM_038533989.1	protein_coding	3	c.595-7368G>A
chr4	12670832	C	T	PASS	T	intron_variant	MODIFIER	CCDC6	CCDC6	transcript	XM_038533990.1	protein_coding	3	c.595-7368G>A
chr4	12670832	C	T	PASS	T	intron_variant	MODIFIER	CCDC6	CCDC6	transcript	XM_038533991.1	protein_coding	3	c.595-7368G>A
chr4	14283066	C	T	PASS	T	intron_variant	MODIFIER	LOC100687708	LOC100687708	transcript	XR_005357861.1	pseudogene	1	n.148+6433G>A
chr4	14283066	C	T	PASS	T	intron_variant	MODIFIER	LOC111095457	LOC111095457	transcript	XR_005357866.1	pseudogene	1	n.170+12839C>T
chr4	14283066	C	T	PASS	T	intron_variant	MODIFIER	LOC100687708	LOC100687708	transcript	XR_005357860.1	pseudogene	1	n.148+6433G>A
chr4	14283066	C	T	PASS	T	intron_variant	MODIFIER	LOC100687708	LOC100687708	transcript	XR_005357862.1	pseudogene	1	n.148+6433G>A
chr4	14283066	C	T	PASS	T	intron_variant	MODIFIER	LOC111095457	LOC111095457	transcript	XR_005357865.1	pseudogene	1	n.170+12839C>T
chr4	14726224	T	A	PASS	A	intron_variant	MODIFIER	ARID5B	ARID5B	transcript	XM_038534033.1	protein_coding	3	c.503-19822T>A
chr4	14991800	C	T	PASS	T	intergenic_region	MODIFIER	RTKN2-ZNF365	RTKN2-ZNF365	intergenic_region	RTKN2_3-ZNF365_3		-1	n.14991800C>T
chr4	15693296	C	G	PASS	G	intron_variant	MODIFIER	NRBF2	NRBF2	transcript	XM_038534064.1	protein_coding	1	c.30+7904C>G
chr4	15693296	C	G	PASS	G	intron_variant	MODIFIER	NRBF2	NRBF2	transcript	XM_038534065.1	protein_coding	1	c.85+7904C>G
chr4	16758598	T	C	PASS	C	intergenic_region	MODIFIER	LOC106558700-LOC100686418	LOC106558700-LOC100686418	intergenic_region	LOC106558700_3-LOC100686418_3		-1	n.16758598T>C
chr4	17292067	C	G	PASS	G	intergenic_region	MODIFIER	LOC119874891-LOC102152895	LOC119874891-LOC102152895	intergenic_region	LOC119874891_3-LOC102152895_3		-1	n.17292067C>G
chr4	17393914	T	A	PASS	A	intergenic_region	MODIFIER	LOC119874891-LOC102152895	LOC119874891-LOC102152895	intergenic_region	LOC119874891_3-LOC102152895_3		-1	n.17393914T>A
chr4	17565623	A	G	PASS	G	intergenic_region	MODIFIER	LOC102152895-LOC100856460	LOC102152895-LOC100856460	intergenic_region	LOC102152895_3-LOC100856460_3		-1	n.17565623A>G
chr4	17592270	C	T	PASS	T	intergenic_region	MODIFIER	LOC102152895-LOC100856460	LOC102152895-LOC100856460	intergenic_region	LOC102152895_3-LOC100856460_3		-1	n.17592270C>T
chr4	17774583	A	T	PASS	T	intergenic_region	MODIFIER	LOC102152895-LOC100856460	LOC102152895-LOC100856460	intergenic_region	LOC102152895_3-LOC100856460_3		-1	n.17774583A>T
chr4	17883415	C	T	PASS	T	intragenic_variant	MODIFIER	LOC100687454_2	LOC100687454_2	gene_variant	LOC100687454_2		-1	n.17883415C>T
chr4	17892655	A	AG	PASS	AG	intragenic_variant	MODIFIER	LOC100687454_2	LOC100687454_2	gene_variant	LOC100687454_2		-1	n.17892655_17892656insG
chr4	17928853	G	A	PASS	A	intragenic_variant	MODIFIER	LOC100687454_2	LOC100687454_2	gene_variant	LOC100687454_2		-1	n.17928853G>A
chr4	17929809	T	C	PASS	C	intragenic_variant	MODIFIER	LOC100687454_2	LOC100687454_2	gene_variant	LOC100687454_2		-1	n.17929809T>C
chr4	17964266	A	G	PASS	G	intergenic_region	MODIFIER	LOC100687454_2-CTNNA3	LOC100687454_2-CTNNA3	intergenic_region	LOC100687454_2-CTNNA3_3		-1	n.17964266A>G
chr4	18018367	C	T	PASS	T	intergenic_region	MODIFIER	LOC100687454_2-CTNNA3	LOC100687454_2-CTNNA3	intergenic_region	LOC100687454_2-CTNNA3_3		-1	n.18018367C>T
chr4	18037062	G	T	PASS	T	intergenic_region	MODIFIER	LOC100687454_2-CTNNA3	LOC100687454_2-CTNNA3	intergenic_region	LOC100687454_2-CTNNA3_3		-1	n.18037062G>T
chr4	18073534	A	G	PASS	G	intergenic_region	MODIFIER	LOC100687454_2-CTNNA3	LOC100687454_2-CTNNA3	intergenic_region	LOC100687454_2-CTNNA3_3		-1	n.18073534A>G
chr4	18103309	C	T	PASS	T	intron_variant	MODIFIER	CTNNA3	CTNNA3	transcript	XM_038534067.1	protein_coding	17	c.2401-12421G>A
chr4	18103309	C	T	PASS	T	intron_variant	MODIFIER	CTNNA3	CTNNA3	transcript	XM_038534069.1	protein_coding	16	c.2401-12421G>A
chr4	18103309	C	T	PASS	T	intron_variant	MODIFIER	CTNNA3	CTNNA3	transcript	XM_038534068.1	protein_coding	17	c.2401-12421G>A
chr4	18131361	T	C	PASS	C	intron_variant	MODIFIER	CTNNA3	CTNNA3	transcript	XM_038534067.1	protein_coding	17	c.2400+20163A>G
chr4	18131361	T	C	PASS	C	intron_variant	MODIFIER	CTNNA3	CTNNA3	transcript	XM_038534069.1	protein_coding	16	c.2400+20163A>G
chr4	18131361	T	C	PASS	C	intron_variant	MODIFIER	CTNNA3	CTNNA3	transcript	XM_038534068.1	protein_coding	17	c.2400+20163A>G
chr4	18169166	C	T	PASS	T	intron_variant	MODIFIER	CTNNA3	CTNNA3	transcript	XM_038534067.1	protein_coding	15	c.2160-6507G>A
chr4	18169166	C	T	PASS	T	intron_variant	MODIFIER	CTNNA3	CTNNA3	transcript	XM_038534069.1	protein_coding	14	c.2160-6507G>A
chr4	18169166	C	T	PASS	T	intron_variant	MODIFIER	CTNNA3	CTNNA3	transcript	XM_038534068.1	protein_coding	15	c.2160-6507G>A
chr4	18269981	C	T	PASS	T	intron_variant	MODIFIER	CTNNA3	CTNNA3	transcript	XM_038534067.1	protein_coding	13	c.1885-1268G>A
chr4	18269981	C	T	PASS	T	intron_variant	MODIFIER	CTNNA3	CTNNA3	transcript	XM_038534069.1	protein_coding	12	c.1885-1268G>A
chr4	18269981	C	T	PASS	T	intron_variant	MODIFIER	CTNNA3	CTNNA3	transcript	XM_038534068.1	protein_coding	13	c.1885-1268G>A
chr4	18269981	C	T	PASS	T	intron_variant	MODIFIER	CTNNA3	CTNNA3	transcript	XM_038534070.1	protein_coding	13	c.1885-1268G>A
chr4	18326532	G	GA	PASS	GA	intron_variant	MODIFIER	CTNNA3	CTNNA3	transcript	XM_038534067.1	protein_coding	13	c.1885-57820_1885-57819insT
chr4	18326532	G	GA	PASS	GA	intron_variant	MODIFIER	CTNNA3	CTNNA3	transcript	XM_038534069.1	protein_coding	12	c.1885-57820_1885-57819insT
chr4	18326532	G	GA	PASS	GA	intron_variant	MODIFIER	CTNNA3	CTNNA3	transcript	XM_038534068.1	protein_coding	13	c.1885-57820_1885-57819insT
chr4	18326532	G	GA	PASS	GA	intron_variant	MODIFIER	CTNNA3	CTNNA3	transcript	XM_038534070.1	protein_coding	13	c.1885-57820_1885-57819insT
chr4	18349246	A	G	PASS	G	intron_variant	MODIFIER	CTNNA3	CTNNA3	transcript	XM_038534067.1	protein_coding	13	c.1884+55698T>C
chr4	18349246	A	G	PASS	G	intron_variant	MODIFIER	CTNNA3	CTNNA3	transcript	XM_038534069.1	protein_coding	12	c.1884+55698T>C
chr4	18349246	A	G	PASS	G	intron_variant	MODIFIER	CTNNA3	CTNNA3	transcript	XM_038534068.1	protein_coding	13	c.1884+55698T>C
chr4	18349246	A	G	PASS	G	intron_variant	MODIFIER	CTNNA3	CTNNA3	transcript	XM_038534070.1	protein_coding	13	c.1884+55698T>C
chr4	18403113	GATA	G	PASS	G	intron_variant	MODIFIER	CTNNA3	CTNNA3	transcript	XM_038534067.1	protein_coding	13	c.1884+1828_1884+1830delTAT
chr4	18403113	GATA	G	PASS	G	intron_variant	MODIFIER	CTNNA3	CTNNA3	transcript	XM_038534069.1	protein_coding	12	c.1884+1828_1884+1830delTAT
chr4	18403113	GATA	G	PASS	G	intron_variant	MODIFIER	CTNNA3	CTNNA3	transcript	XM_038534068.1	protein_coding	13	c.1884+1828_1884+1830delTAT
chr4	18403113	GATA	G	PASS	G	intron_variant	MODIFIER	CTNNA3	CTNNA3	transcript	XM_038534070.1	protein_coding	13	c.1884+1828_1884+1830delTAT
chr4	18403113	GATA	G	PASS	G	intron_variant	MODIFIER	CTNNA3	CTNNA3	transcript	XM_038534071.1	protein_coding	13	c.1884+1828_1884+1830delTAT
chr4	18440907	C	G	PASS	G	intron_variant	MODIFIER	CTNNA3	CTNNA3	transcript	XM_038534067.1	protein_coding	12	c.1733-35812G>C
chr4	18440907	C	G	PASS	G	intron_variant	MODIFIER	CTNNA3	CTNNA3	transcript	XM_038534069.1	protein_coding	11	c.1733-35812G>C
chr4	18440907	C	G	PASS	G	intron_variant	MODIFIER	CTNNA3	CTNNA3	transcript	XM_038534068.1	protein_coding	12	c.1733-35812G>C
chr4	18440907	C	G	PASS	G	intron_variant	MODIFIER	CTNNA3	CTNNA3	transcript	XM_038534070.1	protein_coding	12	c.1733-35812G>C
chr4	18440907	C	G	PASS	G	intron_variant	MODIFIER	CTNNA3	CTNNA3	transcript	XM_038534071.1	protein_coding	12	c.1733-35812G>C
chr4	18505628	TAGAG	T	PASS	T	intron_variant	MODIFIER	CTNNA3	CTNNA3	transcript	XM_038534067.1	protein_coding	12	c.1732+15186_1732+15189delCTCT
chr4	18505628	TAGAG	T	PASS	T	intron_variant	MODIFIER	CTNNA3	CTNNA3	transcript	XM_038534069.1	protein_coding	11	c.1732+15186_1732+15189delCTCT
chr4	18505628	TAGAG	T	PASS	T	intron_variant	MODIFIER	CTNNA3	CTNNA3	transcript	XM_038534068.1	protein_coding	12	c.1732+15186_1732+15189delCTCT
chr4	18505628	TAGAG	T	PASS	T	intron_variant	MODIFIER	CTNNA3	CTNNA3	transcript	XM_038534070.1	protein_coding	12	c.1732+15186_1732+15189delCTCT
chr4	18505628	TAGAG	T	PASS	T	intron_variant	MODIFIER	CTNNA3	CTNNA3	transcript	XM_038534071.1	protein_coding	12	c.1732+15186_1732+15189delCTCT
chr4	18619097	A	G	PASS	G	intron_variant	MODIFIER	CTNNA3	CTNNA3	transcript	XM_038534067.1	protein_coding	11	c.1531+18431T>C
chr4	18619097	A	G	PASS	G	intron_variant	MODIFIER	CTNNA3	CTNNA3	transcript	XM_038534069.1	protein_coding	10	c.1531+18431T>C
chr4	18619097	A	G	PASS	G	intron_variant	MODIFIER	CTNNA3	CTNNA3	transcript	XM_038534068.1	protein_coding	11	c.1531+18431T>C
chr4	18619097	A	G	PASS	G	intron_variant	MODIFIER	CTNNA3	CTNNA3	transcript	XM_038534070.1	protein_coding	11	c.1531+18431T>C
chr4	18619097	A	G	PASS	G	intron_variant	MODIFIER	CTNNA3	CTNNA3	transcript	XM_038534071.1	protein_coding	11	c.1531+18431T>C
chr4	18675577	C	T	PASS	T	downstream_gene_variant	MODIFIER	LOC111095465	LOC111095465	transcript	XR_005357904.1	pseudogene	-1	n.*2349C>T
chr4	18675577	C	T	PASS	T	downstream_gene_variant	MODIFIER	LOC111095465	LOC111095465	transcript	XR_005357905.1	pseudogene	-1	n.*2349C>T
chr4	18675577	C	T	PASS	T	intron_variant	MODIFIER	CTNNA3	CTNNA3	transcript	XM_038534067.1	protein_coding	10	c.1374+34653G>A
chr4	18675577	C	T	PASS	T	intron_variant	MODIFIER	CTNNA3	CTNNA3	transcript	XM_038534069.1	protein_coding	9	c.1374+34653G>A
chr4	18675577	C	T	PASS	T	intron_variant	MODIFIER	CTNNA3	CTNNA3	transcript	XM_038534068.1	protein_coding	10	c.1374+34653G>A
chr4	18675577	C	T	PASS	T	intron_variant	MODIFIER	CTNNA3	CTNNA3	transcript	XM_038534070.1	protein_coding	10	c.1374+34653G>A
chr4	18675577	C	T	PASS	T	intron_variant	MODIFIER	CTNNA3	CTNNA3	transcript	XM_038534071.1	protein_coding	10	c.1374+34653G>A
chr4	18675577	C	T	PASS	T	intron_variant	MODIFIER	CTNNA3	CTNNA3	transcript	XM_038534072.1	protein_coding	10	c.1374+34653G>A
chr4	18675577	C	T	PASS	T	intron_variant	MODIFIER	CTNNA3	CTNNA3	transcript	XM_038534073.1	protein_coding	10	c.1374+34653G>A
chr4	18768088	A	AT	PASS	AT	intron_variant	MODIFIER	CTNNA3	CTNNA3	transcript	XM_038534067.1	protein_coding	9	c.1282-57767_1282-57766insA
chr4	18768088	A	AT	PASS	AT	intron_variant	MODIFIER	CTNNA3	CTNNA3	transcript	XM_038534069.1	protein_coding	8	c.1282-57767_1282-57766insA
chr4	18768088	A	AT	PASS	AT	intron_variant	MODIFIER	CTNNA3	CTNNA3	transcript	XM_038534068.1	protein_coding	9	c.1282-57767_1282-57766insA
chr4	18768088	A	AT	PASS	AT	intron_variant	MODIFIER	CTNNA3	CTNNA3	transcript	XM_038534070.1	protein_coding	9	c.1282-57767_1282-57766insA
chr4	18768088	A	AT	PASS	AT	intron_variant	MODIFIER	CTNNA3	CTNNA3	transcript	XM_038534071.1	protein_coding	9	c.1282-57767_1282-57766insA
chr4	18768088	A	AT	PASS	AT	intron_variant	MODIFIER	CTNNA3	CTNNA3	transcript	XM_038534072.1	protein_coding	9	c.1282-57767_1282-57766insA
chr4	18768088	A	AT	PASS	AT	intron_variant	MODIFIER	CTNNA3	CTNNA3	transcript	XM_038534073.1	protein_coding	9	c.1282-57767_1282-57766insA
chr4	18777953	C	T	PASS	T	intron_variant	MODIFIER	CTNNA3	CTNNA3	transcript	XM_038534067.1	protein_coding	9	c.1282-67631G>A
chr4	18777953	C	T	PASS	T	intron_variant	MODIFIER	CTNNA3	CTNNA3	transcript	XM_038534069.1	protein_coding	8	c.1282-67631G>A
chr4	18777953	C	T	PASS	T	intron_variant	MODIFIER	CTNNA3	CTNNA3	transcript	XM_038534068.1	protein_coding	9	c.1282-67631G>A
chr4	18777953	C	T	PASS	T	intron_variant	MODIFIER	CTNNA3	CTNNA3	transcript	XM_038534070.1	protein_coding	9	c.1282-67631G>A
chr4	18777953	C	T	PASS	T	intron_variant	MODIFIER	CTNNA3	CTNNA3	transcript	XM_038534071.1	protein_coding	9	c.1282-67631G>A
chr4	18777953	C	T	PASS	T	intron_variant	MODIFIER	CTNNA3	CTNNA3	transcript	XM_038534072.1	protein_coding	9	c.1282-67631G>A
chr4	18777953	C	T	PASS	T	intron_variant	MODIFIER	CTNNA3	CTNNA3	transcript	XM_038534073.1	protein_coding	9	c.1282-67631G>A
chr4	18960595	G	A	PASS	A	intron_variant	MODIFIER	CTNNA3	CTNNA3	transcript	XM_038534067.1	protein_coding	7	c.1048-83031C>T
chr4	18960595	G	A	PASS	A	intron_variant	MODIFIER	CTNNA3	CTNNA3	transcript	XM_038534069.1	protein_coding	6	c.1048-83031C>T
chr4	18960595	G	A	PASS	A	intron_variant	MODIFIER	CTNNA3	CTNNA3	transcript	XM_038534068.1	protein_coding	7	c.1048-83031C>T
chr4	18960595	G	A	PASS	A	intron_variant	MODIFIER	CTNNA3	CTNNA3	transcript	XM_038534070.1	protein_coding	7	c.1048-83031C>T
chr4	18960595	G	A	PASS	A	intron_variant	MODIFIER	CTNNA3	CTNNA3	transcript	XM_038534071.1	protein_coding	7	c.1048-83031C>T
chr4	18960595	G	A	PASS	A	intron_variant	MODIFIER	CTNNA3	CTNNA3	transcript	XM_038534072.1	protein_coding	7	c.1048-83031C>T
chr4	18960595	G	A	PASS	A	intron_variant	MODIFIER	CTNNA3	CTNNA3	transcript	XM_038534073.1	protein_coding	7	c.1048-83031C>T
chr4	19025294	C	T	PASS	T	intron_variant	MODIFIER	CTNNA3	CTNNA3	transcript	XM_038534067.1	protein_coding	7	c.1048-147730G>A
chr4	19025294	C	T	PASS	T	intron_variant	MODIFIER	CTNNA3	CTNNA3	transcript	XM_038534069.1	protein_coding	6	c.1048-147730G>A
chr4	19025294	C	T	PASS	T	intron_variant	MODIFIER	CTNNA3	CTNNA3	transcript	XM_038534068.1	protein_coding	7	c.1048-147730G>A
chr4	19025294	C	T	PASS	T	intron_variant	MODIFIER	CTNNA3	CTNNA3	transcript	XM_038534070.1	protein_coding	7	c.1048-147730G>A
chr4	19025294	C	T	PASS	T	intron_variant	MODIFIER	CTNNA3	CTNNA3	transcript	XM_038534071.1	protein_coding	7	c.1048-147730G>A
chr4	19025294	C	T	PASS	T	intron_variant	MODIFIER	CTNNA3	CTNNA3	transcript	XM_038534072.1	protein_coding	7	c.1048-147730G>A
chr4	19025294	C	T	PASS	T	intron_variant	MODIFIER	CTNNA3	CTNNA3	transcript	XM_038534073.1	protein_coding	7	c.1048-147730G>A
chr4	19326502	A	G	PASS	G	intron_variant	MODIFIER	CTNNA3	CTNNA3	transcript	XM_038534067.1	protein_coding	6	c.843+2496T>C
chr4	19326502	A	G	PASS	G	intron_variant	MODIFIER	CTNNA3	CTNNA3	transcript	XM_038534069.1	protein_coding	5	c.843+2496T>C
chr4	19326502	A	G	PASS	G	intron_variant	MODIFIER	CTNNA3	CTNNA3	transcript	XM_038534068.1	protein_coding	6	c.843+2496T>C
chr4	19326502	A	G	PASS	G	intron_variant	MODIFIER	CTNNA3	CTNNA3	transcript	XM_038534070.1	protein_coding	6	c.843+2496T>C
chr4	19326502	A	G	PASS	G	intron_variant	MODIFIER	CTNNA3	CTNNA3	transcript	XM_038534071.1	protein_coding	6	c.843+2496T>C
chr4	19326502	A	G	PASS	G	intron_variant	MODIFIER	CTNNA3	CTNNA3	transcript	XM_038534072.1	protein_coding	6	c.843+2496T>C
chr4	19326502	A	G	PASS	G	intron_variant	MODIFIER	CTNNA3	CTNNA3	transcript	XM_038534073.1	protein_coding	6	c.843+2496T>C
chr4	19358815	G	C	PASS	C	intron_variant	MODIFIER	CTNNA3	CTNNA3	transcript	XM_038534067.1	protein_coding	5	c.580-29554C>G
chr4	19358815	G	C	PASS	C	intron_variant	MODIFIER	CTNNA3	CTNNA3	transcript	XM_038534069.1	protein_coding	4	c.580-29554C>G
chr4	19358815	G	C	PASS	C	intron_variant	MODIFIER	CTNNA3	CTNNA3	transcript	XM_038534068.1	protein_coding	5	c.580-29554C>G
chr4	19358815	G	C	PASS	C	intron_variant	MODIFIER	CTNNA3	CTNNA3	transcript	XM_038534070.1	protein_coding	5	c.580-29554C>G
chr4	19358815	G	C	PASS	C	intron_variant	MODIFIER	CTNNA3	CTNNA3	transcript	XM_038534071.1	protein_coding	5	c.580-29554C>G
chr4	19358815	G	C	PASS	C	intron_variant	MODIFIER	CTNNA3	CTNNA3	transcript	XM_038534072.1	protein_coding	5	c.580-29554C>G
chr4	19358815	G	C	PASS	C	intron_variant	MODIFIER	CTNNA3	CTNNA3	transcript	XM_038534073.1	protein_coding	5	c.580-29554C>G
chr4	19432915	A	T	PASS	T	intron_variant	MODIFIER	CTNNA3	CTNNA3	transcript	XM_038534067.1	protein_coding	5	c.580-103654T>A
chr4	19432915	A	T	PASS	T	intron_variant	MODIFIER	CTNNA3	CTNNA3	transcript	XM_038534069.1	protein_coding	4	c.580-103654T>A
chr4	19432915	A	T	PASS	T	intron_variant	MODIFIER	CTNNA3	CTNNA3	transcript	XM_038534068.1	protein_coding	5	c.580-103654T>A
chr4	19432915	A	T	PASS	T	intron_variant	MODIFIER	CTNNA3	CTNNA3	transcript	XM_038534070.1	protein_coding	5	c.580-103654T>A
chr4	19432915	A	T	PASS	T	intron_variant	MODIFIER	CTNNA3	CTNNA3	transcript	XM_038534071.1	protein_coding	5	c.580-103654T>A
chr4	19432915	A	T	PASS	T	intron_variant	MODIFIER	CTNNA3	CTNNA3	transcript	XM_038534072.1	protein_coding	5	c.580-103654T>A
chr4	19432915	A	T	PASS	T	intron_variant	MODIFIER	CTNNA3	CTNNA3	transcript	XM_038534073.1	protein_coding	5	c.580-103654T>A
chr4	20263584	A	G	PASS	G	intron_variant	MODIFIER	PBLD	PBLD	transcript	XM_038534130.1	protein_coding	1	c.46-8921T>C
chr4	20263584	A	G	PASS	G	intron_variant	MODIFIER	PBLD	PBLD	transcript	XM_038534131.1	protein_coding	1	c.46-8921T>C
chr4	20263584	A	G	PASS	G	intron_variant	MODIFIER	PBLD	PBLD	transcript	XM_038534132.1	protein_coding	1	c.46-8921T>C
chr4	20263584	A	G	PASS	G	intron_variant	MODIFIER	PBLD	PBLD	transcript	XR_005357907.1	pseudogene	1	n.318-8921T>C
chr4	20433794	G	A	PASS	A	intron_variant	MODIFIER	SLC25A16	SLC25A16	transcript	XM_038534134.1	protein_coding	4	c.419-8048C>T
chr4	20433794	G	A	PASS	A	intron_variant	MODIFIER	SLC25A16	SLC25A16	transcript	XM_038534136.1	protein_coding	2	c.-3+1746C>T
chr4	20433794	G	A	PASS	A	intron_variant	MODIFIER	SLC25A16	SLC25A16	transcript	XM_038534137.1	protein_coding	4	c.419-8048C>T
chr4	20839088	T	A	PASS	A	intron_variant	MODIFIER	DDX21	DDX21	transcript	XM_038534155.1	protein_coding	7	c.1242+48T>A
chr4	20932802	T	G	PASS	G	intron_variant	MODIFIER	LOC106558673	LOC106558673	transcript	XR_005357911.1	pseudogene	2	n.321-3760A>C
chr4	20932802	T	G	PASS	G	intron_variant	MODIFIER	LOC106558673	LOC106558673	transcript	XR_005357910.1	pseudogene	2	n.321-3760A>C
chr4	20932802	T	G	PASS	G	intron_variant	MODIFIER	LOC106558673	LOC106558673	transcript	XR_005357912.1	pseudogene	2	n.319-3760A>C
chr4	20952049	T	C	PASS	C	intron_variant	MODIFIER	LOC106558673	LOC106558673	transcript	XR_005357911.1	pseudogene	2	n.320+3810A>G
chr4	20952049	T	C	PASS	C	intron_variant	MODIFIER	SRGN	SRGN	transcript	XM_038534157.1	protein_coding	1	c.76+1908T>C
chr4	20952049	T	C	PASS	C	intron_variant	MODIFIER	LOC106558673	LOC106558673	transcript	XR_005357910.1	pseudogene	2	n.320+3810A>G
chr4	20952049	T	C	PASS	C	intron_variant	MODIFIER	LOC106558673	LOC106558673	transcript	XR_005357912.1	pseudogene	2	n.318+3810A>G
chr4	21680408	G	A	PASS	A	intron_variant	MODIFIER	COL13A1	COL13A1	transcript	XM_038534171.1	protein_coding	25	c.1339-329G>A
chr4	21680408	G	A	PASS	A	intron_variant	MODIFIER	COL13A1	COL13A1	transcript	XM_038534174.1	protein_coding	24	c.1312-329G>A
chr4	21680408	G	A	PASS	A	intron_variant	MODIFIER	COL13A1	COL13A1	transcript	XM_038534187.1	protein_coding	24	c.1303-329G>A
chr4	21680408	G	A	PASS	A	intron_variant	MODIFIER	COL13A1	COL13A1	transcript	XM_038534172.1	protein_coding	25	c.1330-329G>A
chr4	21680408	G	A	PASS	A	intron_variant	MODIFIER	COL13A1	COL13A1	transcript	XM_038534180.1	protein_coding	24	c.1273-329G>A
chr4	21680408	G	A	PASS	A	intron_variant	MODIFIER	COL13A1	COL13A1	transcript	XM_038534188.1	protein_coding	25	c.1330-329G>A
chr4	21680408	G	A	PASS	A	intron_variant	MODIFIER	COL13A1	COL13A1	transcript	XM_038534186.1	protein_coding	24	c.1303-329G>A
chr4	21680408	G	A	PASS	A	intron_variant	MODIFIER	COL13A1	COL13A1	transcript	XM_038534173.1	protein_coding	25	c.1339-329G>A
chr4	21680408	G	A	PASS	A	intron_variant	MODIFIER	COL13A1	COL13A1	transcript	XM_038534175.1	protein_coding	25	c.1339-329G>A
chr4	21680408	G	A	PASS	A	intron_variant	MODIFIER	COL13A1	COL13A1	transcript	XM_038534176.1	protein_coding	24	c.1303-329G>A
chr4	21680408	G	A	PASS	A	intron_variant	MODIFIER	COL13A1	COL13A1	transcript	XM_038534177.1	protein_coding	24	c.1303-329G>A
chr4	21680408	G	A	PASS	A	intron_variant	MODIFIER	COL13A1	COL13A1	transcript	XM_038534178.1	protein_coding	25	c.1339-329G>A
chr4	21680408	G	A	PASS	A	intron_variant	MODIFIER	COL13A1	COL13A1	transcript	XM_038534181.1	protein_coding	25	c.1339-329G>A
chr4	21680408	G	A	PASS	A	intron_variant	MODIFIER	COL13A1	COL13A1	transcript	XM_038534182.1	protein_coding	25	c.1339-329G>A
chr4	21680408	G	A	PASS	A	intron_variant	MODIFIER	COL13A1	COL13A1	transcript	XM_038534183.1	protein_coding	25	c.1339-329G>A
chr4	21680408	G	A	PASS	A	intron_variant	MODIFIER	COL13A1	COL13A1	transcript	XM_038534184.1	protein_coding	24	c.1303-329G>A
chr4	21680408	G	A	PASS	A	intron_variant	MODIFIER	COL13A1	COL13A1	transcript	XM_038534185.1	protein_coding	24	c.1312-329G>A
chr4	21953759	A	T	PASS	T	downstream_gene_variant	MODIFIER	LRRC20	LRRC20	transcript	XM_038534211.1	protein_coding	-1	c.*5238T>A
chr4	21953759	A	T	PASS	T	downstream_gene_variant	MODIFIER	LRRC20	LRRC20	transcript	XM_038534212.1	protein_coding	-1	c.*5238T>A
chr4	21953759	A	T	PASS	T	intergenic_region	MODIFIER	NPFFR1-LRRC20	NPFFR1-LRRC20	intergenic_region	NPFFR1_3-LRRC20_3		-1	n.21953759A>T
chr4	30339685	C	G	PASS	G	intron_variant	MODIFIER	TSPAN14	TSPAN14	transcript	XM_038534485.1	protein_coding	3	c.81+1230C>G
chr4	30339685	C	G	PASS	G	intron_variant	MODIFIER	TSPAN14	TSPAN14	transcript	XM_038534486.1	protein_coding	2	c.81+1230C>G
chr4	30339685	C	G	PASS	G	intron_variant	MODIFIER	TSPAN14	TSPAN14	transcript	XM_038534488.1	protein_coding	2	c.81+1230C>G
chr4	30339685	C	G	PASS	G	intron_variant	MODIFIER	TSPAN14	TSPAN14	transcript	XM_038534487.1	protein_coding	2	c.81+1230C>G
chr4	47690715	C	CTAAACTGTTACATTAAAAAAAAAAAAAAAAAAAAAAAAAAAAAAAAAAAAAAAAAAAAAAA	PASS	CTAAACTGTTACATTAAAAAAAAAAAAAAAAAAAAAAAAAAAAAAAAAAAAAAAAAAAAAAA	intergenic_region	MODIFIER	LOC111095562-LOC119871739	LOC111095562-LOC119871739	intergenic_region	LOC111095562_3-LOC119871739_3		-1	n.47690715_47690716insTAAACTGTTACATTAAAAAAAAAAAAAAAAAAAAAAAAAAAAAAAAAAAAAAAAAAAAAAA
chr4	48176283	GAGAC	G	PASS	G	intergenic_region	MODIFIER	LOC119871720-LOC111095565	LOC119871720-LOC111095565	intergenic_region	LOC119871720_3-LOC111095565_3		-1	n.48176284_48176287delAGAC
chr4	49014399	G	T	PASS	T	intergenic_region	MODIFIER	LOC102155509-LOC100685112	LOC102155509-LOC100685112	intergenic_region	LOC102155509_3-LOC100685112_3		-1	n.49014399G>T
chr4	49226119	T	G	PASS	G	intron_variant	MODIFIER	LOC106558726	LOC106558726	transcript	XR_005357619.1	pseudogene	1	n.170+9694A>C
chr4	49236436	C	A	PASS	A	upstream_gene_variant	MODIFIER	LOC106558726	LOC106558726	transcript	XR_005357619.1	pseudogene	-1	n.-454G>T
chr4	49236436	C	A	PASS	A	intergenic_region	MODIFIER	LOC106558726-LOC119871719	LOC106558726-LOC119871719	intergenic_region	LOC106558726_3-LOC119871719_3		-1	n.49236436C>A
chr4	49243292	C	A	PASS	A	intergenic_region	MODIFIER	LOC106558726-LOC119871719	LOC106558726-LOC119871719	intergenic_region	LOC106558726_3-LOC119871719_3		-1	n.49243292C>A
chr4	49243293	A	C	PASS	C	intergenic_region	MODIFIER	LOC106558726-LOC119871719	LOC106558726-LOC119871719	intergenic_region	LOC106558726_3-LOC119871719_3		-1	n.49243293A>C
chr4	49615983	C	T	PASS	T	intergenic_region	MODIFIER	LOC119871719-LOC100688858	LOC119871719-LOC100688858	intergenic_region	LOC119871719_3-LOC100688858_3		-1	n.49615983C>T
chr4	49723396	G	GA	PASS	GA	intron_variant	MODIFIER	GABRG2	GABRG2	transcript	XM_038534835.1	protein_coding	6	c.770-15821_770-15820insT
chr4	49723396	G	GA	PASS	GA	intron_variant	MODIFIER	GABRG2	GABRG2	transcript	XM_038534836.1	protein_coding	6	c.770-15821_770-15820insT
chr4	49723396	G	GA	PASS	GA	intron_variant	MODIFIER	GABRG2	GABRG2	transcript	XM_038534837.1	protein_coding	6	c.770-28072_770-28071insT
chr4	51633694	C	T	PASS	T	intergenic_region	MODIFIER	ADRA1B-LOC119871638	ADRA1B-LOC119871638	intergenic_region	ADRA1B_3-LOC119871638_3		-1	n.51633694C>T
chr4	51880060	G	T	PASS	T	intergenic_region	MODIFIER	LOC119871639-LOC100682974	LOC119871639-LOC100682974	intergenic_region	LOC119871639_3-LOC100682974_3		-1	n.51880060G>T
chr4	52213891	T	C	PASS	C	intron_variant	MODIFIER	RNF145	RNF145	transcript	XM_038534882.1	protein_coding	8	c.1121+1643T>C
chr4	52213891	T	C	PASS	C	intron_variant	MODIFIER	RNF145	RNF145	transcript	XM_038534883.1	protein_coding	8	c.1121+1643T>C
chr4	53465276	G	A	PASS	A	intron_variant	MODIFIER	THG1L	THG1L	transcript	XM_038534906.1	protein_coding	2	c.56+6393C>T
chr4	53465276	G	A	PASS	A	intron_variant	MODIFIER	THG1L	THG1L	transcript	XM_038534907.1	protein_coding	3	c.56+6393C>T
chr4	53465276	G	A	PASS	A	intron_variant	MODIFIER	THG1L	THG1L	transcript	XM_038534909.1	protein_coding	3	c.56+6393C>T
chr4	53465276	G	A	PASS	A	intron_variant	MODIFIER	THG1L	THG1L	transcript	XM_038534908.1	protein_coding	3	c.56+6393C>T
chr4	53489169	G	C	PASS	C	intron_variant	MODIFIER	SOX30	SOX30	transcript	XM_038534902.1	protein_coding	5	c.1997+4292G>C
chr4	53489169	G	C	PASS	C	intron_variant	MODIFIER	SOX30	SOX30	transcript	XM_038534905.1	protein_coding	3	c.1456+11222G>C
chr4	53489169	G	C	PASS	C	intron_variant	MODIFIER	SOX30	SOX30	transcript	XM_038534904.1	protein_coding	5	c.1997+4292G>C
chr4	53489169	G	C	PASS	C	intron_variant	MODIFIER	SOX30	SOX30	transcript	XM_038534903.1	protein_coding	4	c.1949+4292G>C
chr4	53494991	A	T	PASS	T	downstream_gene_variant	MODIFIER	SOX30	SOX30	transcript	XM_038534904.1	protein_coding	-1	c.*445A>T
chr4	53494991	A	T	PASS	T	intron_variant	MODIFIER	SOX30	SOX30	transcript	XM_038534902.1	protein_coding	5	c.1998-7151A>T
chr4	53494991	A	T	PASS	T	intron_variant	MODIFIER	SOX30	SOX30	transcript	XM_038534905.1	protein_coding	3	c.1457-7151A>T
chr4	53494991	A	T	PASS	T	intron_variant	MODIFIER	SOX30	SOX30	transcript	XM_038534903.1	protein_coding	4	c.1950-7151A>T
chr4	53503431	C	G	PASS	G	downstream_gene_variant	MODIFIER	SOX30	SOX30	transcript	XM_038534902.1	protein_coding	-1	c.*908C>G
chr4	53503431	C	G	PASS	G	downstream_gene_variant	MODIFIER	SOX30	SOX30	transcript	XM_038534905.1	protein_coding	-1	c.*1171C>G
chr4	53503431	C	G	PASS	G	downstream_gene_variant	MODIFIER	SOX30	SOX30	transcript	XM_038534903.1	protein_coding	-1	c.*908C>G
chr4	53503431	C	G	PASS	G	intergenic_region	MODIFIER	SOX30-LOC111095571	SOX30-LOC111095571	intergenic_region	SOX30_3-LOC111095571_3		-1	n.53503431C>G
chr4	53835823	G	A	PASS	A	intron_variant	MODIFIER	ITK	ITK	transcript	XM_038534925.1	protein_coding	1	c.139-3132C>T
chr4	53925020	C	T	PASS	T	intergenic_region	MODIFIER	HAVCR2-HAVCR1	HAVCR2-HAVCR1	intergenic_region	HAVCR2_3-HAVCR1_3		-1	n.53925020C>T
chr4	53933022	T	C	PASS	C	upstream_gene_variant	MODIFIER	HAVCR1	HAVCR1	transcript	NM_001205114.1_3	protein_coding	-1	c.-763T>C
chr4	53933022	T	C	PASS	C	intergenic_region	MODIFIER	HAVCR2-HAVCR1	HAVCR2-HAVCR1	intergenic_region	HAVCR2_3-HAVCR1_3		-1	n.53933022T>C
chr4	54026560	T	C	PASS	C	downstream_gene_variant	MODIFIER	TIMD4	TIMD4	transcript	XM_038534928.1	protein_coding	-1	c.*8213T>C
chr4	54026560	T	C	PASS	C	downstream_gene_variant	MODIFIER	TIMD4	TIMD4	transcript	XM_038534929.1	protein_coding	-1	c.*8213T>C
chr4	54026560	T	C	PASS	C	intergenic_region	MODIFIER	TIMD4-SGCD	TIMD4-SGCD	intergenic_region	TIMD4_3-SGCD_3		-1	n.54026560T>C
chr4	55389004	G	A	PASS	A	intergenic_region	MODIFIER	SGCD-LOC119871642	SGCD-LOC119871642	intergenic_region	SGCD_3-LOC119871642_3		-1	n.55389004G>A
chr4	59467981	C	CGA	PASS	CGA	intergenic_region	MODIFIER	LOC119871530-NDST1	LOC119871530-NDST1	intergenic_region	LOC119871530_3-NDST1_3		-1	n.59467981_59467982insGA
chr4	59595012	C	T	PASS	T	intergenic_region	MODIFIER	LOC479328-CD74	LOC479328-CD74	intergenic_region	LOC479328_3-CD74_3		-1	n.59595012C>T
chr4	60137090	C	T	PASS	T	intron_variant	MODIFIER	PPARGC1B	PPARGC1B	transcript	XM_038535053.1	protein_coding	1	c.79-21646G>A
chr4	60137090	C	T	PASS	T	intron_variant	MODIFIER	PPARGC1B	PPARGC1B	transcript	XM_038535054.1	protein_coding	1	c.79-21646G>A
chr4	60137090	C	T	PASS	T	intron_variant	MODIFIER	PPARGC1B	PPARGC1B	transcript	XR_005358436.1	pseudogene	1	n.150-21646G>A
chr4	60146002	G	A	PASS	A	intron_variant	MODIFIER	PPARGC1B	PPARGC1B	transcript	XM_038535053.1	protein_coding	1	c.79-30558C>T
chr4	60146002	G	A	PASS	A	intron_variant	MODIFIER	PPARGC1B	PPARGC1B	transcript	XM_038535054.1	protein_coding	1	c.79-30558C>T
chr4	60146002	G	A	PASS	A	intron_variant	MODIFIER	PPARGC1B	PPARGC1B	transcript	XR_005358436.1	pseudogene	1	n.150-30558C>T
chr4	60146124	T	C	PASS	C	intron_variant	MODIFIER	PPARGC1B	PPARGC1B	transcript	XM_038535053.1	protein_coding	1	c.79-30680A>G
chr4	60146124	T	C	PASS	C	intron_variant	MODIFIER	PPARGC1B	PPARGC1B	transcript	XM_038535054.1	protein_coding	1	c.79-30680A>G
chr4	60146124	T	C	PASS	C	intron_variant	MODIFIER	PPARGC1B	PPARGC1B	transcript	XR_005358436.1	pseudogene	1	n.150-30680A>G
chr4	60146518	G	A	PASS	A	intron_variant	MODIFIER	PPARGC1B	PPARGC1B	transcript	XM_038535053.1	protein_coding	1	c.79-31074C>T
chr4	60146518	G	A	PASS	A	intron_variant	MODIFIER	PPARGC1B	PPARGC1B	transcript	XM_038535054.1	protein_coding	1	c.79-31074C>T
chr4	60146518	G	A	PASS	A	intron_variant	MODIFIER	PPARGC1B	PPARGC1B	transcript	XR_005358436.1	pseudogene	1	n.150-31074C>T
chr4	60146929	A	T	PASS	T	intron_variant	MODIFIER	PPARGC1B	PPARGC1B	transcript	XM_038535053.1	protein_coding	1	c.79-31485T>A
chr4	60146929	A	T	PASS	T	intron_variant	MODIFIER	PPARGC1B	PPARGC1B	transcript	XM_038535054.1	protein_coding	1	c.79-31485T>A
chr4	60146929	A	T	PASS	T	intron_variant	MODIFIER	PPARGC1B	PPARGC1B	transcript	XR_005358436.1	pseudogene	1	n.150-31485T>A
chr4	60151456	A	T	PASS	T	intron_variant	MODIFIER	PPARGC1B	PPARGC1B	transcript	XM_038535053.1	protein_coding	1	c.79-36012T>A
chr4	60151456	A	T	PASS	T	intron_variant	MODIFIER	PPARGC1B	PPARGC1B	transcript	XM_038535054.1	protein_coding	1	c.79-36012T>A
chr4	60151456	A	T	PASS	T	intron_variant	MODIFIER	PPARGC1B	PPARGC1B	transcript	XR_005358436.1	pseudogene	1	n.150-36012T>A
chr4	60152917	C	T	PASS	T	intron_variant	MODIFIER	PPARGC1B	PPARGC1B	transcript	XM_038535053.1	protein_coding	1	c.79-37473G>A
chr4	60152917	C	T	PASS	T	intron_variant	MODIFIER	PPARGC1B	PPARGC1B	transcript	XM_038535054.1	protein_coding	1	c.79-37473G>A
chr4	60152917	C	T	PASS	T	intron_variant	MODIFIER	PPARGC1B	PPARGC1B	transcript	XR_005358436.1	pseudogene	1	n.150-37473G>A
chr4	60153653	C	T	PASS	T	intron_variant	MODIFIER	PPARGC1B	PPARGC1B	transcript	XM_038535053.1	protein_coding	1	c.79-38209G>A
chr4	60153653	C	T	PASS	T	intron_variant	MODIFIER	PPARGC1B	PPARGC1B	transcript	XM_038535054.1	protein_coding	1	c.79-38209G>A
chr4	60153653	C	T	PASS	T	intron_variant	MODIFIER	PPARGC1B	PPARGC1B	transcript	XR_005358436.1	pseudogene	1	n.150-38209G>A
chr4	60153662	C	T	PASS	T	intron_variant	MODIFIER	PPARGC1B	PPARGC1B	transcript	XM_038535053.1	protein_coding	1	c.79-38218G>A
chr4	60153662	C	T	PASS	T	intron_variant	MODIFIER	PPARGC1B	PPARGC1B	transcript	XM_038535054.1	protein_coding	1	c.79-38218G>A
chr4	60153662	C	T	PASS	T	intron_variant	MODIFIER	PPARGC1B	PPARGC1B	transcript	XR_005358436.1	pseudogene	1	n.150-38218G>A
chr4	60154045	T	C	PASS	C	intron_variant	MODIFIER	PPARGC1B	PPARGC1B	transcript	XM_038535053.1	protein_coding	1	c.79-38601A>G
chr4	60154045	T	C	PASS	C	intron_variant	MODIFIER	PPARGC1B	PPARGC1B	transcript	XM_038535054.1	protein_coding	1	c.79-38601A>G
chr4	60154045	T	C	PASS	C	intron_variant	MODIFIER	PPARGC1B	PPARGC1B	transcript	XR_005358436.1	pseudogene	1	n.150-38601A>G
chr4	60154046	G	A	PASS	A	intron_variant	MODIFIER	PPARGC1B	PPARGC1B	transcript	XM_038535053.1	protein_coding	1	c.79-38602C>T
chr4	60154046	G	A	PASS	A	intron_variant	MODIFIER	PPARGC1B	PPARGC1B	transcript	XM_038535054.1	protein_coding	1	c.79-38602C>T
chr4	60154046	G	A	PASS	A	intron_variant	MODIFIER	PPARGC1B	PPARGC1B	transcript	XR_005358436.1	pseudogene	1	n.150-38602C>T
chr4	60154065	AAGAC	A	PASS	A	intron_variant	MODIFIER	PPARGC1B	PPARGC1B	transcript	XM_038535053.1	protein_coding	1	c.79-38625_79-38622delGTCT
chr4	60154065	AAGAC	A	PASS	A	intron_variant	MODIFIER	PPARGC1B	PPARGC1B	transcript	XM_038535054.1	protein_coding	1	c.79-38625_79-38622delGTCT
chr4	60154065	AAGAC	A	PASS	A	intron_variant	MODIFIER	PPARGC1B	PPARGC1B	transcript	XR_005358436.1	pseudogene	1	n.150-38625_150-38622delGTCT
chr4	60154236	GGGGTCCAAAGGCAGATGTAGACCAGAAA	G	PASS	G	intron_variant	MODIFIER	PPARGC1B	PPARGC1B	transcript	XM_038535053.1	protein_coding	1	c.79-38820_79-38793delTTTCTGGTCTACATCTGCCTTTGGACCC
chr4	60154236	GGGGTCCAAAGGCAGATGTAGACCAGAAA	G	PASS	G	intron_variant	MODIFIER	PPARGC1B	PPARGC1B	transcript	XM_038535054.1	protein_coding	1	c.79-38820_79-38793delTTTCTGGTCTACATCTGCCTTTGGACCC
chr4	60154236	GGGGTCCAAAGGCAGATGTAGACCAGAAA	G	PASS	G	intron_variant	MODIFIER	PPARGC1B	PPARGC1B	transcript	XR_005358436.1	pseudogene	1	n.150-38820_150-38793delTTTCTGGTCTACATCTGCCTTTGGACCC
chr4	60154319	G	A	PASS	A	intron_variant	MODIFIER	PPARGC1B	PPARGC1B	transcript	XM_038535053.1	protein_coding	1	c.79-38875C>T
chr4	60154319	G	A	PASS	A	intron_variant	MODIFIER	PPARGC1B	PPARGC1B	transcript	XM_038535054.1	protein_coding	1	c.79-38875C>T
chr4	60154319	G	A	PASS	A	intron_variant	MODIFIER	PPARGC1B	PPARGC1B	transcript	XR_005358436.1	pseudogene	1	n.150-38875C>T
chr4	60154337	C	A	PASS	A	intron_variant	MODIFIER	PPARGC1B	PPARGC1B	transcript	XM_038535053.1	protein_coding	1	c.79-38893G>T
chr4	60154337	C	A	PASS	A	intron_variant	MODIFIER	PPARGC1B	PPARGC1B	transcript	XM_038535054.1	protein_coding	1	c.79-38893G>T
chr4	60154337	C	A	PASS	A	intron_variant	MODIFIER	PPARGC1B	PPARGC1B	transcript	XR_005358436.1	pseudogene	1	n.150-38893G>T
chr4	60154709	A	G	PASS	G	intron_variant	MODIFIER	PPARGC1B	PPARGC1B	transcript	XM_038535053.1	protein_coding	1	c.78+39167T>C
chr4	60154709	A	G	PASS	G	intron_variant	MODIFIER	PPARGC1B	PPARGC1B	transcript	XM_038535054.1	protein_coding	1	c.78+39167T>C
chr4	60154709	A	G	PASS	G	intron_variant	MODIFIER	PPARGC1B	PPARGC1B	transcript	XR_005358436.1	pseudogene	1	n.149+39167T>C
chr4	60155890	A	G	PASS	G	intron_variant	MODIFIER	PPARGC1B	PPARGC1B	transcript	XM_038535053.1	protein_coding	1	c.78+37986T>C
chr4	60155890	A	G	PASS	G	intron_variant	MODIFIER	PPARGC1B	PPARGC1B	transcript	XM_038535054.1	protein_coding	1	c.78+37986T>C
chr4	60155890	A	G	PASS	G	intron_variant	MODIFIER	PPARGC1B	PPARGC1B	transcript	XR_005358436.1	pseudogene	1	n.149+37986T>C
chr4	60155987	AT	A	PASS	A	intron_variant	MODIFIER	PPARGC1B	PPARGC1B	transcript	XM_038535053.1	protein_coding	1	c.78+37888delA
chr4	60155987	AT	A	PASS	A	intron_variant	MODIFIER	PPARGC1B	PPARGC1B	transcript	XM_038535054.1	protein_coding	1	c.78+37888delA
chr4	60155987	AT	A	PASS	A	intron_variant	MODIFIER	PPARGC1B	PPARGC1B	transcript	XR_005358436.1	pseudogene	1	n.149+37888delA
chr4	60158253	C	T	PASS	T	intron_variant	MODIFIER	PPARGC1B	PPARGC1B	transcript	XM_038535053.1	protein_coding	1	c.78+35623G>A
chr4	60158253	C	T	PASS	T	intron_variant	MODIFIER	PPARGC1B	PPARGC1B	transcript	XM_038535054.1	protein_coding	1	c.78+35623G>A
chr4	60158253	C	T	PASS	T	intron_variant	MODIFIER	PPARGC1B	PPARGC1B	transcript	XR_005358436.1	pseudogene	1	n.149+35623G>A
chr4	60158517	G	T	PASS	T	intron_variant	MODIFIER	PPARGC1B	PPARGC1B	transcript	XM_038535053.1	protein_coding	1	c.78+35359C>A
chr4	60158517	G	T	PASS	T	intron_variant	MODIFIER	PPARGC1B	PPARGC1B	transcript	XM_038535054.1	protein_coding	1	c.78+35359C>A
chr4	60158517	G	T	PASS	T	intron_variant	MODIFIER	PPARGC1B	PPARGC1B	transcript	XR_005358436.1	pseudogene	1	n.149+35359C>A
chr4	60158642	G	A	PASS	A	intron_variant	MODIFIER	PPARGC1B	PPARGC1B	transcript	XM_038535053.1	protein_coding	1	c.78+35234C>T
chr4	60158642	G	A	PASS	A	intron_variant	MODIFIER	PPARGC1B	PPARGC1B	transcript	XM_038535054.1	protein_coding	1	c.78+35234C>T
chr4	60158642	G	A	PASS	A	intron_variant	MODIFIER	PPARGC1B	PPARGC1B	transcript	XR_005358436.1	pseudogene	1	n.149+35234C>T
chr4	60160929	A	T	PASS	T	intron_variant	MODIFIER	PPARGC1B	PPARGC1B	transcript	XM_038535053.1	protein_coding	1	c.78+32947T>A
chr4	60160929	A	T	PASS	T	intron_variant	MODIFIER	PPARGC1B	PPARGC1B	transcript	XM_038535054.1	protein_coding	1	c.78+32947T>A
chr4	60160929	A	T	PASS	T	intron_variant	MODIFIER	PPARGC1B	PPARGC1B	transcript	XR_005358436.1	pseudogene	1	n.149+32947T>A
chr4	60163453	C	CT	PASS	CT	intron_variant	MODIFIER	PPARGC1B	PPARGC1B	transcript	XM_038535053.1	protein_coding	1	c.78+30422_78+30423insA
chr4	60163453	C	CT	PASS	CT	intron_variant	MODIFIER	PPARGC1B	PPARGC1B	transcript	XM_038535054.1	protein_coding	1	c.78+30422_78+30423insA
chr4	60163453	C	CT	PASS	CT	intron_variant	MODIFIER	PPARGC1B	PPARGC1B	transcript	XR_005358436.1	pseudogene	1	n.149+30422_149+30423insA
chr4	60165363	A	C	PASS	C	intron_variant	MODIFIER	PPARGC1B	PPARGC1B	transcript	XM_038535053.1	protein_coding	1	c.78+28513T>G
chr4	60165363	A	C	PASS	C	intron_variant	MODIFIER	PPARGC1B	PPARGC1B	transcript	XM_038535054.1	protein_coding	1	c.78+28513T>G
chr4	60165363	A	C	PASS	C	intron_variant	MODIFIER	PPARGC1B	PPARGC1B	transcript	XR_005358436.1	pseudogene	1	n.149+28513T>G
chr4	60173873	TC	T	PASS	T	intron_variant	MODIFIER	PPARGC1B	PPARGC1B	transcript	XM_038535053.1	protein_coding	1	c.78+20002delG
chr4	60173873	TC	T	PASS	T	intron_variant	MODIFIER	PPARGC1B	PPARGC1B	transcript	XM_038535054.1	protein_coding	1	c.78+20002delG
chr4	60173873	TC	T	PASS	T	intron_variant	MODIFIER	PPARGC1B	PPARGC1B	transcript	XR_005358436.1	pseudogene	1	n.149+20002delG
chr4	60176228	GC	G	PASS	G	intron_variant	MODIFIER	PPARGC1B	PPARGC1B	transcript	XM_038535053.1	protein_coding	1	c.78+17647delG
chr4	60176228	GC	G	PASS	G	intron_variant	MODIFIER	PPARGC1B	PPARGC1B	transcript	XM_038535054.1	protein_coding	1	c.78+17647delG
chr4	60176228	GC	G	PASS	G	intron_variant	MODIFIER	PPARGC1B	PPARGC1B	transcript	XR_005358436.1	pseudogene	1	n.149+17647delG
chr4	60176503	AGTGTTCC	A	PASS	A	intron_variant	MODIFIER	PPARGC1B	PPARGC1B	transcript	XM_038535053.1	protein_coding	1	c.78+17366_78+17372delGGAACAC
chr4	60176503	AGTGTTCC	A	PASS	A	intron_variant	MODIFIER	PPARGC1B	PPARGC1B	transcript	XM_038535054.1	protein_coding	1	c.78+17366_78+17372delGGAACAC
chr4	60176503	AGTGTTCC	A	PASS	A	intron_variant	MODIFIER	PPARGC1B	PPARGC1B	transcript	XR_005358436.1	pseudogene	1	n.149+17366_149+17372delGGAACAC
chr4	60177815	C	T	PASS	T	intron_variant	MODIFIER	PPARGC1B	PPARGC1B	transcript	XM_038535053.1	protein_coding	1	c.78+16061G>A
chr4	60177815	C	T	PASS	T	intron_variant	MODIFIER	PPARGC1B	PPARGC1B	transcript	XM_038535054.1	protein_coding	1	c.78+16061G>A
chr4	60177815	C	T	PASS	T	intron_variant	MODIFIER	PPARGC1B	PPARGC1B	transcript	XR_005358436.1	pseudogene	1	n.149+16061G>A
chr4	68749761	T	C	PASS	C	intron_variant	MODIFIER	OXCT1	OXCT1	transcript	XM_038535212.1	protein_coding	14	c.1339-1959T>C
chr4	78944947	A	G	PASS	G	intergenic_region	MODIFIER	LOC119871687-LOC100855942	LOC119871687-LOC100855942	intergenic_region	LOC119871687_3-LOC100855942_3		-1	n.78944947A>G
chr4	79375993	G	A	PASS	A	intergenic_region	MODIFIER	LOC119871651-LOC111095736	LOC119871651-LOC111095736	intergenic_region	LOC119871651_3-LOC111095736_3		-1	n.79375993G>A
chr4	79805717	G	A	PASS	A	intergenic_region	MODIFIER	LOC111095736-CDH9	LOC111095736-CDH9	intergenic_region	LOC111095736_3-CDH9_3		-1	n.79805717G>A
chr4	80697034	A	C	PASS	C	intergenic_region	MODIFIER	LOC111095660-LOC102156538	LOC111095660-LOC102156538	intergenic_region	LOC111095660_3-LOC102156538_3		-1	n.80697034A>C
chr4	81354636	C	A	PASS	A	upstream_gene_variant	MODIFIER	LOC119876171	LOC119876171	transcript	XR_005357660.1	pseudogene	-1	n.-4271C>A
chr4	81354636	C	A	PASS	A	intergenic_region	MODIFIER	LOC119876225-LOC119876171	LOC119876225-LOC119876171	intergenic_region	LOC119876225-LOC119876171		-1	n.81354636C>A
chr4	82067890	G	A	PASS	A	intron_variant	MODIFIER	CDH10	CDH10	transcript	XM_038535412.1	protein_coding	1	c.-125-9603G>A
chr4	82067890	G	A	PASS	A	intron_variant	MODIFIER	CDH10	CDH10	transcript	XM_038535414.1	protein_coding	1	c.-125-9603G>A
chr4	82067890	G	A	PASS	A	intron_variant	MODIFIER	CDH10	CDH10	transcript	XM_038535413.1	protein_coding	1	c.-125-9603G>A
chr4	82315296	C	T	PASS	T	intergenic_region	MODIFIER	CDH10-LOC119874869_2	CDH10-LOC119874869_2	intergenic_region	CDH10_3-LOC119874869_2		-1	n.82315296C>T
chr4	82343266	T	A	PASS	A	intergenic_region	MODIFIER	CDH10-LOC119874869_2	CDH10-LOC119874869_2	intergenic_region	CDH10_3-LOC119874869_2		-1	n.82343266T>A
chr4	82807822	C	T	PASS	T	intergenic_region	MODIFIER	LOC489252-LOC102156814	LOC489252-LOC102156814	intergenic_region	LOC489252_3-LOC102156814_3		-1	n.82807822C>T
chr4	82808215	A	G	PASS	G	intergenic_region	MODIFIER	LOC489252-LOC102156814	LOC489252-LOC102156814	intergenic_region	LOC489252_3-LOC102156814_3		-1	n.82808215A>G
chr4	82847122	C	A	PASS	A	intergenic_region	MODIFIER	LOC489252-LOC102156814	LOC489252-LOC102156814	intergenic_region	LOC489252_3-LOC102156814_3		-1	n.82847122C>A
chr4	82847134	A	C	PASS	C	intergenic_region	MODIFIER	LOC489252-LOC102156814	LOC489252-LOC102156814	intergenic_region	LOC489252_3-LOC102156814_3		-1	n.82847134A>C
chr4	82867519	A	T	PASS	T	intergenic_region	MODIFIER	LOC489252-LOC102156814	LOC489252-LOC102156814	intergenic_region	LOC489252_3-LOC102156814_3		-1	n.82867519A>T
chr4	82934982	T	C	PASS	C	intergenic_region	MODIFIER	LOC489252-LOC102156814	LOC489252-LOC102156814	intergenic_region	LOC489252_3-LOC102156814_3		-1	n.82934982T>C
chr4	83294235	A	T	PASS	T	intron_variant	MODIFIER	CDH12	CDH12	transcript	XM_038535416.1	protein_coding	1	c.-267+30492A>T
chr4	83294235	A	T	PASS	T	intron_variant	MODIFIER	CDH12	CDH12	transcript	XM_038535417.1	protein_coding	1	c.-399+30492A>T
chr4	83818351	A	AT	PASS	AT	intron_variant	MODIFIER	CDH12	CDH12	transcript	XM_038535416.1	protein_coding	2	c.-187+141334_-187+141335insT
chr4	83818351	A	AT	PASS	AT	intron_variant	MODIFIER	CDH12	CDH12	transcript	XM_038535417.1	protein_coding	2	c.-318-74373_-318-74372insT
chr4	84690339	C	T	PASS	T	intergenic_region	MODIFIER	LOC111095739-CDH18	LOC111095739-CDH18	intergenic_region	LOC111095739_3-CDH18_3		-1	n.84690339C>T
chr4	84901806	C	T	PASS	T	intergenic_region	MODIFIER	LOC111095739-CDH18	LOC111095739-CDH18	intergenic_region	LOC111095739_3-CDH18_3		-1	n.84901806C>T
chr4	85659620	G	A	PASS	A	upstream_gene_variant	MODIFIER	CDH18	CDH18	transcript	XM_038535424.1	protein_coding	-1	c.-1071G>A
chr4	85659620	G	A	PASS	A	upstream_gene_variant	MODIFIER	CDH18	CDH18	transcript	XM_038535422.1	protein_coding	-1	c.-1967G>A
chr4	85659620	G	A	PASS	A	intron_variant	MODIFIER	CDH18	CDH18	transcript	XM_038535419.1	protein_coding	3	c.-256+138750G>A
chr4	85659620	G	A	PASS	A	intron_variant	MODIFIER	CDH18	CDH18	transcript	XM_038535427.1	protein_coding	3	c.-256+138750G>A
chr4	85659620	G	A	PASS	A	intron_variant	MODIFIER	CDH18	CDH18	transcript	XM_038535428.1	protein_coding	3	c.-256+138750G>A
chr4	85659620	G	A	PASS	A	intron_variant	MODIFIER	CDH18	CDH18	transcript	XM_038535420.1	protein_coding	4	c.-256+120026G>A
chr4	85659620	G	A	PASS	A	intron_variant	MODIFIER	CDH18	CDH18	transcript	XM_038535425.1	protein_coding	3	c.-256+138750G>A
chr4	85659620	G	A	PASS	A	intron_variant	MODIFIER	CDH18	CDH18	transcript	XM_038535421.1	protein_coding	3	c.-256+138750G>A
chr4	87748130	C	T	PASS	T	intergenic_region	MODIFIER	LOC106558747-LOC111095745	LOC106558747-LOC111095745	intergenic_region	LOC106558747_3-LOC111095745_3		-1	n.87748130C>T
chr4	87754495	C	T	PASS	T	downstream_gene_variant	MODIFIER	LOC111095745	LOC111095745	transcript	XR_005357674.1	pseudogene	-1	n.*921G>A
chr4	87754495	C	T	PASS	T	intergenic_region	MODIFIER	LOC106558747-LOC111095745	LOC106558747-LOC111095745	intergenic_region	LOC106558747_3-LOC111095745_3		-1	n.87754495C>T
chr4	87769504	C	T	PASS	T	intergenic_region	MODIFIER	LOC111095745-LOC119871654	LOC111095745-LOC119871654	intergenic_region	LOC111095745_3-LOC119871654_3		-1	n.87769504C>T
chr4	87779267	T	A	PASS	A	upstream_gene_variant	MODIFIER	LOC119871654	LOC119871654	transcript	XR_005357675.1	pseudogene	-1	n.-1548T>A
chr4	87779267	T	A	PASS	A	intergenic_region	MODIFIER	LOC111095745-LOC119871654	LOC111095745-LOC119871654	intergenic_region	LOC111095745_3-LOC119871654_3		-1	n.87779267T>A
chr4	87785931	A	G	PASS	G	downstream_gene_variant	MODIFIER	LOC119871654	LOC119871654	transcript	XR_005357675.1	pseudogene	-1	n.*4439A>G
chr4	87785931	A	G	PASS	G	intergenic_region	MODIFIER	LOC119871654-LOC111095746	LOC119871654-LOC111095746	intergenic_region	LOC119871654_3-LOC111095746_3		-1	n.87785931A>G
chr4	87795600	C	A	PASS	A	intergenic_region	MODIFIER	LOC119871654-LOC111095746	LOC119871654-LOC111095746	intergenic_region	LOC119871654_3-LOC111095746_3		-1	n.87795600C>A
chr4	88215008	C	T	PASS	T	intergenic_region	MODIFIER	LOC119876214-LOC106558684	LOC119876214-LOC106558684	intergenic_region	LOC119876214-LOC106558684_3		-1	n.88215008C>T
chr4	88361147	CT	C	PASS	C	intergenic_region	MODIFIER	LOC106558684-MARCHF11	LOC106558684-MARCHF11	intergenic_region	LOC106558684_3-MARCHF11_3		-1	n.88361148delT
chr4	88471602	G	A	PASS	A	intron_variant	MODIFIER	MARCHF11	MARCHF11	transcript	XM_038535477.1	protein_coding	3	c.469-2608G>A
chr4	88870081	C	G	PASS	G	intron_variant	MODIFIER	FBXL7	FBXL7	transcript	XM_038535441.1	protein_coding	1	c.38-6946G>C
chr4	88870081	C	G	PASS	G	intron_variant	MODIFIER	FBXL7	FBXL7	transcript	XM_038535442.1	protein_coding	1	c.-104-6946G>C
chr5	85683	A	C	PASS	C	intergenic_region	MODIFIER	OR6C48P-OR6C262P	OR6C48P-OR6C262P	intergenic_region	OR6C48P-OR6C262P_3		-1	n.85683A>C
chr5	6429079	C	T	PASS	T	intergenic_region	MODIFIER	LOC111096091-LOC119871991	LOC111096091-LOC119871991	intergenic_region	LOC111096091_3-LOC119871991_3		-1	n.6429079C>T
chr5	6644722	T	TCAGGGCCTGATCTCAGGATCATGAGTGAAAGCCTCACATGGGCTCCATGCTGGGCATGGAGCCTA	PASS	TCAGGGCCTGATCTCAGGATCATGAGTGAAAGCCTCACATGGGCTCCATGCTGGGCATGGAGCCTA	intergenic_region	MODIFIER	LOC119871992_2-LOC111095786	LOC119871992_2-LOC111095786	intergenic_region	LOC119871992_2-LOC111095786_3		-1	n.6644722_6644723insCAGGGCCTGATCTCAGGATCATGAGTGAAAGCCTCACATGGGCTCCATGCTGGGCATGGAGCCTA
chr5	6644724	T	TAAAAAAA	PASS	TAAAAAAA	intergenic_region	MODIFIER	LOC119871992_2-LOC111095786	LOC119871992_2-LOC111095786	intergenic_region	LOC119871992_2-LOC111095786_3		-1	n.6644724_6644725insAAAAAAA
chr5	24147197	A	G	PASS	G	intron_variant	MODIFIER	C5H11orf65	C5H11orf65	transcript	XM_038536272.1	protein_coding	1	c.64+3552A>G
chr5	24147197	A	G	PASS	G	intron_variant	MODIFIER	C5H11orf65	C5H11orf65	transcript	XM_038536274.1	protein_coding	2	c.13+1735A>G
chr5	24147197	A	G	PASS	G	intron_variant	MODIFIER	C5H11orf65	C5H11orf65	transcript	XM_038536273.1	protein_coding	2	c.13+1735A>G
chr5	24147197	A	G	PASS	G	intron_variant	MODIFIER	C5H11orf65	C5H11orf65	transcript	XM_038536277.1	protein_coding	2	c.13+1735A>G
chr5	24147197	A	G	PASS	G	intron_variant	MODIFIER	C5H11orf65	C5H11orf65	transcript	XM_038536278.1	protein_coding	1	c.64+3552A>G
chr5	24147197	A	G	PASS	G	intron_variant	MODIFIER	C5H11orf65	C5H11orf65	transcript	XM_038536279.1	protein_coding	1	c.64+3552A>G
chr5	24147197	A	G	PASS	G	intron_variant	MODIFIER	C5H11orf65	C5H11orf65	transcript	XM_038536276.1	protein_coding	1	c.64+3552A>G
chr5	24147197	A	G	PASS	G	intron_variant	MODIFIER	C5H11orf65	C5H11orf65	transcript	XM_038536275.1	protein_coding	2	c.13+1735A>G
chr5	24549257	G	A	PASS	A	downstream_gene_variant	MODIFIER	RAB39A	RAB39A	transcript	XM_038536287.1	protein_coding	-1	c.*6557C>T
chr5	24549257	G	A	PASS	A	downstream_gene_variant	MODIFIER	RAB39A	RAB39A	transcript	XM_038536288.1	protein_coding	-1	c.*6557C>T
chr5	24549257	G	A	PASS	A	intergenic_region	MODIFIER	CUL5-RAB39A	CUL5-RAB39A	intergenic_region	CUL5_3-RAB39A_3		-1	n.24549257G>A
chr5	27087403	C	T	PASS	T	intergenic_region	MODIFIER	GRIA4-CASP4	GRIA4-CASP4	intergenic_region	GRIA4_3-CASP4_3		-1	n.27087403C>T
chr5	27421209	C	T	PASS	T	intron_variant	MODIFIER	LOC119871826	LOC119871826	transcript	XR_005359361.1	pseudogene	12	n.1495+48832G>A
chr5	27421209	C	T	PASS	T	intron_variant	MODIFIER	LOC119871826	LOC119871826	transcript	XR_005359362.1	pseudogene	12	n.1496-2772G>A
chr5	27847341	G	A	PASS	A	intergenic_region	MODIFIER	LOC111096104-LOC100687870	LOC111096104-LOC100687870	intergenic_region	LOC111096104_3-LOC100687870_3		-1	n.27847341G>A
chr5	27942050	C	T	PASS	T	intergenic_region	MODIFIER	LOC100687870-LOC111095862	LOC100687870-LOC111095862	intergenic_region	LOC100687870_3-LOC111095862_3		-1	n.27942050C>T
chr5	27954885	A	T	PASS	T	intergenic_region	MODIFIER	LOC100687870-LOC111095862	LOC100687870-LOC111095862	intergenic_region	LOC100687870_3-LOC111095862_3		-1	n.27954885A>T
chr5	27992440	T	A	PASS	A	downstream_gene_variant	MODIFIER	LOC111095862	LOC111095862	transcript	XR_005359401.1	pseudogene	-1	n.*4801A>T
chr5	27992440	T	A	PASS	A	intergenic_region	MODIFIER	LOC100687870-LOC111095862	LOC100687870-LOC111095862	intergenic_region	LOC100687870_3-LOC111095862_3		-1	n.27992440T>A
chr5	30578313	G	C	PASS	C	intron_variant	MODIFIER	UBE2G1	UBE2G1	transcript	XM_038536397.1	protein_coding	1	c.47-16805C>G
chr5	30630500	G	A	PASS	A	intron_variant	MODIFIER	UBE2G1	UBE2G1	transcript	XM_038536397.1	protein_coding	1	c.46+957C>T
chr5	31519849	C	T	PASS	T	3_prime_UTR_variant	MODIFIER	MIS12	MIS12	transcript	XM_038536469.1	protein_coding	2	c.*949G>A
chr5	31519849	C	T	PASS	T	3_prime_UTR_variant	MODIFIER	MIS12	MIS12	transcript	XM_038536470.1	protein_coding	2	c.*949G>A
chr5	48038447	T	C	PASS	C	intergenic_region	MODIFIER	USP1-LOC106558772	USP1-LOC106558772	intergenic_region	USP1_3-LOC106558772_3		-1	n.48038447T>C
chr5	48871167	T	A	PASS	A	intron_variant	MODIFIER	NFIA	NFIA	transcript	XM_038537346.1	protein_coding	11	c.1620+4761A>T
chr5	48871167	T	A	PASS	A	intron_variant	MODIFIER	NFIA	NFIA	transcript	XM_038537353.1	protein_coding	10	c.1512+4761A>T
chr5	48871167	T	A	PASS	A	intron_variant	MODIFIER	NFIA	NFIA	transcript	XM_038537350.1	protein_coding	11	c.1566+4761A>T
chr5	48871167	T	A	PASS	A	intron_variant	MODIFIER	NFIA	NFIA	transcript	XM_038537355.1	protein_coding	11	c.1551+4761A>T
chr5	48871167	T	A	PASS	A	intron_variant	MODIFIER	NFIA	NFIA	transcript	XM_038537352.1	protein_coding	11	c.1425+4761A>T
chr5	48871167	T	A	PASS	A	intron_variant	MODIFIER	NFIA	NFIA	transcript	XM_038537354.1	protein_coding	11	c.1425+4761A>T
chr5	48871167	T	A	PASS	A	intron_variant	MODIFIER	NFIA	NFIA	transcript	XM_038537349.1	protein_coding	10	c.1566+4761A>T
chr5	48871167	T	A	PASS	A	intron_variant	MODIFIER	NFIA	NFIA	transcript	XM_038537348.1	protein_coding	10	c.1528+24211A>T
chr5	48871167	T	A	PASS	A	intron_variant	MODIFIER	NFIA	NFIA	transcript	XM_038537347.1	protein_coding	11	c.1605+4761A>T
chr5	48871167	T	A	PASS	A	intron_variant	MODIFIER	NFIA	NFIA	transcript	XM_038537351.1	protein_coding	9	c.1420+24211A>T
chr5	62893071	G	GAC	PASS	GAC	intergenic_region	MODIFIER	CA6-LOC489640	CA6-LOC489640	intergenic_region	CA6_3-LOC489640_3		-1	n.62893071_62893072insAC
chr5	74876030	C	T	PASS	T	intergenic_region	MODIFIER	LOC106558849-LOC111096127	LOC106558849-LOC111096127	intergenic_region	LOC106558849_3-LOC111096127_3		-1	n.74876030C>T
chr5	89121693	T	C	PASS	C	intergenic_region	MODIFIER	LOC111096138-LOC111096139	LOC111096138-LOC111096139	intergenic_region	LOC111096138_3-LOC111096139_3		-1	n.89121693T>C
chr5	89186578	AGG	A	PASS	A	intergenic_region	MODIFIER	LOC111096138-LOC111096139	LOC111096138-LOC111096139	intergenic_region	LOC111096138_3-LOC111096139_3		-1	n.89186579_89186580delGG
chr6	5546994	ACAAAACAT	A	PASS	A	intron_variant	MODIFIER	RCC1L	RCC1L	transcript	XM_038539049.1	protein_coding	1	c.328-1170_328-1163delATGTTTTG
chr6	5546994	ACAAAACAT	A	PASS	A	intron_variant	MODIFIER	RCC1L	RCC1L	transcript	XM_038539051.1	protein_coding	1	c.328-1170_328-1163delATGTTTTG
chr6	5546994	ACAAAACAT	A	PASS	A	intron_variant	MODIFIER	RCC1L	RCC1L	transcript	XM_038539050.1	protein_coding	1	c.328-1170_328-1163delATGTTTTG
chr6	5546994	ACAAAACAT	A	PASS	A	intron_variant	MODIFIER	RCC1L	RCC1L	transcript	XM_038539052.1	protein_coding	1	c.328-1170_328-1163delATGTTTTG
chr6	8100564	CG	C	PASS	C	upstream_gene_variant	MODIFIER	CUX1_4	CUX1_4	transcript	XM_038539186.1	protein_coding	-1	c.-385delC
chr6	8100564	CG	C	PASS	C	upstream_gene_variant	MODIFIER	LOC111096201	LOC111096201	transcript	XR_005360550.1	pseudogene	-1	n.-2041delC
chr6	8100564	CG	C	PASS	C	upstream_gene_variant	MODIFIER	CUX1_4	CUX1_4	transcript	XM_038539189.1	protein_coding	-1	c.-385delC
chr6	8100564	CG	C	PASS	C	upstream_gene_variant	MODIFIER	CUX1_4	CUX1_4	transcript	XM_038539190.1	protein_coding	-1	c.-385delC
chr6	8100564	CG	C	PASS	C	upstream_gene_variant	MODIFIER	CUX1_4	CUX1_4	transcript	XM_038539191.1	protein_coding	-1	c.-385delC
chr6	8100564	CG	C	PASS	C	upstream_gene_variant	MODIFIER	CUX1_4	CUX1_4	transcript	XM_038539188.1	protein_coding	-1	c.-1882delC
chr6	8100564	CG	C	PASS	C	upstream_gene_variant	MODIFIER	CUX1_4	CUX1_4	transcript	XM_038539187.1	protein_coding	-1	c.-385delC
chr6	8100564	CG	C	PASS	C	upstream_gene_variant	MODIFIER	LOC111096201	LOC111096201	transcript	XR_005360548.1	pseudogene	-1	n.-2043delC
chr6	8100564	CG	C	PASS	C	upstream_gene_variant	MODIFIER	LOC111096201	LOC111096201	transcript	XR_005360549.1	pseudogene	-1	n.-2042delC
chr6	8100564	CG	C	PASS	C	intergenic_region	MODIFIER	CUX1_4-LOC111096486	CUX1_4-LOC111096486	intergenic_region	CUX1_4-LOC111096486_3		-1	n.8100565delG
chr6	10285473	C	G	PASS	G	intron_variant	MODIFIER	ARPC1B	ARPC1B	transcript	XM_038539417.1	protein_coding	1	c.-14+2212G>C
chr6	10289401	C	T	PASS	T	upstream_gene_variant	MODIFIER	ARPC1B	ARPC1B	transcript	XM_038539417.1	protein_coding	-1	c.-1730G>A
chr6	10289401	C	T	PASS	T	intergenic_region	MODIFIER	ARPC1B-ARPC1A	ARPC1B-ARPC1A	intergenic_region	ARPC1B_3-ARPC1A_3		-1	n.10289401C>T
chr6	10326914	C	T	PASS	T	upstream_gene_variant	MODIFIER	LOC119872157	LOC119872157	transcript	XR_005360580.1	pseudogene	-1	n.-676C>T
chr6	10326914	C	T	PASS	T	intron_variant	MODIFIER	ARPC1A	ARPC1A	transcript	XM_038539441.1	protein_coding	1	c.-30+491G>A
chr6	10381572	C	T	PASS	T	intron_variant	MODIFIER	LOC119872157	LOC119872157	transcript	XR_005360580.1	pseudogene	4	n.1823-6116C>T
chr6	10381572	C	T	PASS	T	intron_variant	MODIFIER	MYH16	MYH16	transcript	XM_038539442.1	protein_coding	18	c.2412+1094G>A
chr6	10395868	G	A	PASS	A	intron_variant	MODIFIER	MYH16	MYH16	transcript	XM_038539442.1	protein_coding	6	c.873+384C>T
chr6	10435272	C	T	PASS	T	intron_variant	MODIFIER	KPNA7	KPNA7	transcript	XM_038539443.1	protein_coding	6	c.696+964C>T
chr6	10459064	AGGACT	A	PASS	A	intergenic_region	MODIFIER	KPNA7-LOC119876350	KPNA7-LOC119876350	intergenic_region	KPNA7_3-LOC119876350		-1	n.10459065_10459069delGGACT
chr6	10521614	C	A	PASS	A	intron_variant	MODIFIER	SMURF1	SMURF1	transcript	XM_038539444.1	protein_coding	1	c.56-26134C>A
chr6	10521614	C	A	PASS	A	intron_variant	MODIFIER	SMURF1	SMURF1	transcript	XM_038539445.1	protein_coding	1	c.56-26134C>A
chr6	10561384	T	C	PASS	C	intron_variant	MODIFIER	SMURF1	SMURF1	transcript	XM_038539444.1	protein_coding	11	c.1256+1265T>C
chr6	10561384	T	C	PASS	C	intron_variant	MODIFIER	SMURF1	SMURF1	transcript	XM_038539445.1	protein_coding	11	c.1256+1265T>C
chr6	10760612	G	A	PASS	A	intergenic_region	MODIFIER	TMEM130-LOC111096216	TMEM130-LOC111096216	intergenic_region	TMEM130_3-LOC111096216_3		-1	n.10760612G>A
chr6	11500905	C	T	PASS	T	intron_variant	MODIFIER	PMS2	PMS2	transcript	XM_038539467.1	protein_coding	11	c.2097-216G>A
chr6	11500905	C	T	PASS	T	intron_variant	MODIFIER	PMS2	PMS2	transcript	XM_038539469.1	protein_coding	7	c.1347-216G>A
chr6	11500905	C	T	PASS	T	intron_variant	MODIFIER	PMS2	PMS2	transcript	XM_038539468.1	protein_coding	11	c.2019-216G>A
chr6	11523597	G	GT	PASS	GT	upstream_gene_variant	MODIFIER	PMS2	PMS2	transcript	XM_038539467.1	protein_coding	-1	c.-2116_-2115insA
chr6	11523597	G	GT	PASS	GT	upstream_gene_variant	MODIFIER	PMS2	PMS2	transcript	XM_038539468.1	protein_coding	-1	c.-2199_-2198insA
chr6	11523597	G	GT	PASS	GT	intron_variant	MODIFIER	AIMP2	AIMP2	transcript	XM_038539475.1	protein_coding	1	c.135+1720_135+1721insT
chr6	11523597	G	GT	PASS	GT	intron_variant	MODIFIER	AIMP2	AIMP2	transcript	XM_038539476.1	protein_coding	1	c.15+1840_15+1841insT
chr6	11523597	G	GT	PASS	GT	intron_variant	MODIFIER	AIMP2	AIMP2	transcript	XM_038539477.1	protein_coding	1	c.-100+1292_-100+1293insT
chr6	11523597	G	GT	PASS	GT	intron_variant	MODIFIER	AIMP2	AIMP2	transcript	XM_038539478.1	protein_coding	1	c.-100+980_-100+981insT
chr6	11535698	TA	T	PASS	T	upstream_gene_variant	MODIFIER	ANKRD61	ANKRD61	transcript	XM_038539473.1	protein_coding	-1	c.-428delA
chr6	11535698	TA	T	PASS	T	upstream_gene_variant	MODIFIER	ANKRD61	ANKRD61	transcript	XM_038539474.1	protein_coding	-1	c.-428delA
chr6	11535698	TA	T	PASS	T	intron_variant	MODIFIER	EIF2AK1	EIF2AK1	transcript	NM_001161713.1_3	protein_coding	11	c.1324-1178delT
chr6	11654341	C	T	PASS	T	intron_variant	MODIFIER	CYTH3	CYTH3	transcript	XM_038539483.1	protein_coding	4	c.259-1753G>A
chr6	11654341	C	T	PASS	T	intron_variant	MODIFIER	CYTH3	CYTH3	transcript	XM_038539485.1	protein_coding	4	c.106-1753G>A
chr6	11654341	C	T	PASS	T	intron_variant	MODIFIER	CYTH3	CYTH3	transcript	XM_038539484.1	protein_coding	6	c.106-1753G>A
chr6	11748573	T	C	PASS	C	intergenic_region	MODIFIER	CYTH3-LOC100688310	CYTH3-LOC100688310	intergenic_region	CYTH3_3-LOC100688310_3		-1	n.11748573T>C
chr6	11805619	T	G	PASS	G	upstream_gene_variant	MODIFIER	LOC119876354	LOC119876354	transcript	XR_005360613.1	pseudogene	-1	n.-4728A>C
chr6	11805619	T	G	PASS	G	intergenic_region	MODIFIER	LOC119876354-RAC1	LOC119876354-RAC1	intergenic_region	LOC119876354-RAC1_3		-1	n.11805619T>G
chr6	12441854	C	T	PASS	T	upstream_gene_variant	MODIFIER	LOC111096466	LOC111096466	transcript	XM_038539554.1	protein_coding	-1	c.-530C>T
chr6	12441854	C	T	PASS	T	intron_variant	MODIFIER	RNF216	RNF216	transcript	XM_038539546.1	protein_coding	13	c.2074-33407C>T
chr6	12441854	C	T	PASS	T	intron_variant	MODIFIER	RNF216	RNF216	transcript	XM_038539552.1	protein_coding	13	c.2074-33407C>T
chr6	12441854	C	T	PASS	T	intron_variant	MODIFIER	RNF216	RNF216	transcript	XM_038539553.1	protein_coding	13	c.2074-33407C>T
chr6	12441854	C	T	PASS	T	intron_variant	MODIFIER	RNF216	RNF216	transcript	XM_038539551.1	protein_coding	13	c.2074-33407C>T
chr6	12441854	C	T	PASS	T	intron_variant	MODIFIER	RNF216	RNF216	transcript	XM_038539548.1	protein_coding	12	c.1909-33407C>T
chr6	12441854	C	T	PASS	T	intron_variant	MODIFIER	RNF216	RNF216	transcript	XM_038539547.1	protein_coding	13	c.2074-33407C>T
chr6	12441854	C	T	PASS	T	intron_variant	MODIFIER	RNF216	RNF216	transcript	XM_038539549.1	protein_coding	13	c.1903-33407C>T
chr6	12441854	C	T	PASS	T	intron_variant	MODIFIER	RNF216	RNF216	transcript	XM_038539550.1	protein_coding	13	c.1903-33407C>T
chr6	12665379	G	A	PASS	A	intergenic_region	MODIFIER	FBXL18-TNRC18	FBXL18-TNRC18	intergenic_region	FBXL18_3-TNRC18_3		-1	n.12665379G>A
chr6	12832515	C	G	PASS	G	intron_variant	MODIFIER	WIPI2	WIPI2	transcript	XM_038539567.1	protein_coding	2	c.176-2213G>C
chr6	12832515	C	G	PASS	G	intron_variant	MODIFIER	WIPI2	WIPI2	transcript	XR_005360647.1	pseudogene	2	n.282-2213G>C
chr6	12832515	C	G	PASS	G	intron_variant	MODIFIER	WIPI2	WIPI2	transcript	XM_038539572.1	protein_coding	2	c.176-2213G>C
chr6	12832515	C	G	PASS	G	intron_variant	MODIFIER	WIPI2	WIPI2	transcript	XM_038539570.1	protein_coding	2	c.158-2213G>C
chr6	12832515	C	G	PASS	G	intron_variant	MODIFIER	WIPI2	WIPI2	transcript	XM_038539573.1	protein_coding	2	c.158-2213G>C
chr6	12832515	C	G	PASS	G	intron_variant	MODIFIER	WIPI2	WIPI2	transcript	XM_038539571.1	protein_coding	1	c.10-1905G>C
chr6	12832515	C	G	PASS	G	intron_variant	MODIFIER	WIPI2	WIPI2	transcript	XM_038539569.1	protein_coding	2	c.176-2213G>C
chr6	12832515	C	G	PASS	G	intron_variant	MODIFIER	WIPI2	WIPI2	transcript	XM_038539568.1	protein_coding	2	c.158-2213G>C
chr6	13733928	C	T	VQSRTrancheSNP99.90to100.00	T	intron_variant	MODIFIER	SDK1	SDK1	transcript	XM_038539586.1	protein_coding	3	c.299+78320G>A
chr6	13733928	C	T	VQSRTrancheSNP99.90to100.00	T	intron_variant	MODIFIER	SDK1	SDK1	transcript	XM_038539592.1	protein_coding	1	c.8+73269G>A
chr6	13733928	C	T	VQSRTrancheSNP99.90to100.00	T	intron_variant	MODIFIER	SDK1	SDK1	transcript	XM_038539594.1	protein_coding	2	c.-158+35869G>A
chr6	13733928	C	T	VQSRTrancheSNP99.90to100.00	T	intron_variant	MODIFIER	SDK1	SDK1	transcript	XM_038539591.1	protein_coding	1	c.53+73452G>A
chr6	13733928	C	T	VQSRTrancheSNP99.90to100.00	T	intron_variant	MODIFIER	SDK1	SDK1	transcript	XM_038539589.1	protein_coding	3	c.191+78320G>A
chr6	13733928	C	T	VQSRTrancheSNP99.90to100.00	T	intron_variant	MODIFIER	SDK1	SDK1	transcript	XM_038539588.1	protein_coding	3	c.191+78320G>A
chr6	13733928	C	T	VQSRTrancheSNP99.90to100.00	T	intron_variant	MODIFIER	SDK1	SDK1	transcript	XM_038539590.1	protein_coding	3	c.191+78320G>A
chr6	13733928	C	T	VQSRTrancheSNP99.90to100.00	T	intron_variant	MODIFIER	SDK1	SDK1	transcript	XM_038539587.1	protein_coding	3	c.299+78320G>A
chr6	15932990	C	G	PASS	G	intron_variant	MODIFIER	C6H7orf50	C6H7orf50	transcript	XM_038539693.1	protein_coding	2	c.129+26135C>G
chr6	19106320	C	T	PASS	T	intron_variant	MODIFIER	KATNIP	KATNIP	transcript	XM_038539987.1	protein_coding	27	c.4618-457G>A
chr6	19106320	C	T	PASS	T	intron_variant	MODIFIER	KATNIP	KATNIP	transcript	XM_038539988.1	protein_coding	24	c.4468-457G>A
chr6	19422850	CT	C	PASS	C	intergenic_region	MODIFIER	IL21R-IL4R	IL21R-IL4R	intergenic_region	IL21R_3-IL4R_3		-1	n.19422851delT
chr6	20368869	T	TTAA	PASS	TTAA	intergenic_region	MODIFIER	LOC102155970-LOC111096496	LOC102155970-LOC111096496	intergenic_region	LOC102155970_3-LOC111096496_3		-1	n.20368869_20368870insTAA
chr6	21754264	C	CT	PASS	CT	upstream_gene_variant	MODIFIER	RBBP6	RBBP6	transcript	XM_038540023.1	protein_coding	-1	c.-3576_-3575insA
chr6	21754264	C	CT	PASS	CT	upstream_gene_variant	MODIFIER	RBBP6	RBBP6	transcript	XM_038540025.1	protein_coding	-1	c.-3576_-3575insA
chr6	21754264	C	CT	PASS	CT	upstream_gene_variant	MODIFIER	RBBP6	RBBP6	transcript	XM_038540024.1	protein_coding	-1	c.-2487_-2486insA
chr6	21754264	C	CT	PASS	CT	intergenic_region	MODIFIER	RBBP6-LOC111096272	RBBP6-LOC111096272	intergenic_region	RBBP6_3-LOC111096272_3		-1	n.21754264_21754265insT
chr6	21868405	GGATAA	G	PASS	G	downstream_gene_variant	MODIFIER	LOC111096274	LOC111096274	transcript	XR_005360794.1	pseudogene	-1	n.*2733_*2737delGATAA
chr6	21868405	GGATAA	G	PASS	G	intron_variant	MODIFIER	CACNG3	CACNG3	transcript	XM_038540026.1	protein_coding	3	c.437-1067_437-1063delTTATC
chr6	21927503	T	A	PASS	A	upstream_gene_variant	MODIFIER	LOC119872178	LOC119872178	transcript	XR_005360795.1	pseudogene	-1	n.-4091A>T
chr6	21927503	T	A	PASS	A	intron_variant	MODIFIER	CACNG3	CACNG3	transcript	XM_038540026.1	protein_coding	1	c.211+23050A>T
chr6	22155707	T	G	PASS	G	intron_variant	MODIFIER	PRKCB	PRKCB	transcript	XM_038540027.1	protein_coding	3	c.289-12645A>C
chr6	22155707	T	G	PASS	G	intron_variant	MODIFIER	PRKCB	PRKCB	transcript	XM_038540028.1	protein_coding	3	c.289-12645A>C
chr6	22186346	TAAATAAATCCAGGAGAAG	T	PASS	T	intron_variant	MODIFIER	PRKCB	PRKCB	transcript	XM_038540027.1	protein_coding	2	c.206-13285_206-13268delCTTCTCCTGGATTTATTT
chr6	22186346	TAAATAAATCCAGGAGAAG	T	PASS	T	intron_variant	MODIFIER	PRKCB	PRKCB	transcript	XM_038540028.1	protein_coding	2	c.206-13285_206-13268delCTTCTCCTGGATTTATTT
chr6	22186522	G	A	PASS	A	intron_variant	MODIFIER	PRKCB	PRKCB	transcript	XM_038540027.1	protein_coding	2	c.206-13443C>T
chr6	22186522	G	A	PASS	A	intron_variant	MODIFIER	PRKCB	PRKCB	transcript	XM_038540028.1	protein_coding	2	c.206-13443C>T
chr6	22204447	T	C	PASS	C	intron_variant	MODIFIER	PRKCB	PRKCB	transcript	XM_038540027.1	protein_coding	2	c.206-31368A>G
chr6	22204447	T	C	PASS	C	intron_variant	MODIFIER	PRKCB	PRKCB	transcript	XM_038540028.1	protein_coding	2	c.206-31368A>G
chr6	22248348	C	T	PASS	T	intron_variant	MODIFIER	PRKCB	PRKCB	transcript	XM_038540027.1	protein_coding	2	c.205+58547G>A
chr6	22248348	C	T	PASS	T	intron_variant	MODIFIER	PRKCB	PRKCB	transcript	XM_038540028.1	protein_coding	2	c.205+58547G>A
chr6	22283303	A	G	PASS	G	intron_variant	MODIFIER	PRKCB	PRKCB	transcript	XM_038540027.1	protein_coding	2	c.205+23592T>C
chr6	22283303	A	G	PASS	G	intron_variant	MODIFIER	PRKCB	PRKCB	transcript	XM_038540028.1	protein_coding	2	c.205+23592T>C
chr6	22411527	G	A	PASS	A	downstream_gene_variant	MODIFIER	ERN2	ERN2	transcript	XM_038540030.1	protein_coding	-1	c.*1357G>A
chr6	22411527	G	A	PASS	A	intron_variant	MODIFIER	PLK1	PLK1	transcript	XM_038540029.1	protein_coding	7	c.1271-29C>T
chr6	23707408	G	A	PASS	A	intron_variant	MODIFIER	VWA3A	VWA3A	transcript	XM_038540085.1	protein_coding	31	c.3367-429C>T
chr6	23707408	G	A	PASS	A	intron_variant	MODIFIER	VWA3A	VWA3A	transcript	XM_038540086.1	protein_coding	31	c.3367-429C>T
chr6	23707408	G	A	PASS	A	intron_variant	MODIFIER	VWA3A	VWA3A	transcript	XM_038540087.1	protein_coding	31	c.3367-429C>T
chr6	23707408	G	A	PASS	A	intron_variant	MODIFIER	VWA3A	VWA3A	transcript	XM_038540088.1	protein_coding	31	c.3352-429C>T
chr6	23707408	G	A	PASS	A	intron_variant	MODIFIER	VWA3A	VWA3A	transcript	XR_005360828.1	pseudogene	31	n.3718-429C>T
chr6	23707408	G	A	PASS	A	intron_variant	MODIFIER	VWA3A	VWA3A	transcript	XR_005360829.1	pseudogene	31	n.3718-429C>T
chr6	23707408	G	A	PASS	A	intron_variant	MODIFIER	VWA3A	VWA3A	transcript	XR_005360830.1	pseudogene	30	n.3594-429C>T
chr6	23707408	G	A	PASS	A	intron_variant	MODIFIER	VWA3A	VWA3A	transcript	XR_005360831.1	pseudogene	31	n.3714-429C>T
chr6	26630158	GAC	G	PASS	G	intron_variant	MODIFIER	LOC102154816	LOC102154816	transcript	XR_005360886.1	pseudogene	2	n.1402+4395_1402+4396delAC
chr6	28314849	G	A	PASS	A	intron_variant	MODIFIER	MYH11	MYH11	transcript	XM_038540265.1	protein_coding	1	c.-17-5550G>A
chr6	28314849	G	A	PASS	A	intron_variant	MODIFIER	MYH11	MYH11	transcript	XM_038540267.1	protein_coding	1	c.-17-5550G>A
chr6	28314849	G	A	PASS	A	intron_variant	MODIFIER	MYH11	MYH11	transcript	XM_038540268.1	protein_coding	1	c.-17-5550G>A
chr6	28314849	G	A	PASS	A	intron_variant	MODIFIER	MYH11	MYH11	transcript	XM_038540266.1	protein_coding	1	c.-17-5550G>A
chr6	28695892	C	T	PASS	T	downstream_gene_variant	MODIFIER	LOC119872414	LOC119872414	transcript	XR_005361504.1	snoRNA	-1	n.*1633C>T
chr6	28695892	C	T	PASS	T	intron_variant	MODIFIER	PDXDC1	PDXDC1	transcript	XM_038540284.1	protein_coding	5	c.389+295C>T
chr6	28695892	C	T	PASS	T	intron_variant	MODIFIER	PDXDC1	PDXDC1	transcript	XM_038540289.1	protein_coding	6	c.344+295C>T
chr6	28695892	C	T	PASS	T	intron_variant	MODIFIER	PDXDC1	PDXDC1	transcript	XM_038540285.1	protein_coding	5	c.386+295C>T
chr6	28695892	C	T	PASS	T	intron_variant	MODIFIER	PDXDC1	PDXDC1	transcript	XM_038540288.1	protein_coding	5	c.341+295C>T
chr6	28695892	C	T	PASS	T	intron_variant	MODIFIER	PDXDC1	PDXDC1	transcript	XM_038540291.1	protein_coding	5	c.344+295C>T
chr6	28695892	C	T	PASS	T	intron_variant	MODIFIER	PDXDC1	PDXDC1	transcript	XM_038540286.1	protein_coding	5	c.344+295C>T
chr6	28695892	C	T	PASS	T	intron_variant	MODIFIER	PDXDC1	PDXDC1	transcript	XM_038540287.1	protein_coding	5	c.341+295C>T
chr6	28695892	C	T	PASS	T	intron_variant	MODIFIER	PDXDC1	PDXDC1	transcript	XM_038540290.1	protein_coding	4	c.218+295C>T
chr6	28708709	C	T	PASS	T	intron_variant	MODIFIER	PDXDC1	PDXDC1	transcript	XM_038540284.1	protein_coding	12	c.1090-1429C>T
chr6	28708709	C	T	PASS	T	intron_variant	MODIFIER	PDXDC1	PDXDC1	transcript	XM_038540289.1	protein_coding	13	c.1045-1429C>T
chr6	28708709	C	T	PASS	T	intron_variant	MODIFIER	PDXDC1	PDXDC1	transcript	XM_038540285.1	protein_coding	12	c.1087-1429C>T
chr6	28708709	C	T	PASS	T	intron_variant	MODIFIER	PDXDC1	PDXDC1	transcript	XM_038540288.1	protein_coding	12	c.1042-1429C>T
chr6	28708709	C	T	PASS	T	intron_variant	MODIFIER	PDXDC1	PDXDC1	transcript	XM_038540291.1	protein_coding	12	c.1045-1429C>T
chr6	28708709	C	T	PASS	T	intron_variant	MODIFIER	PDXDC1	PDXDC1	transcript	XM_038540286.1	protein_coding	12	c.1045-1429C>T
chr6	28708709	C	T	PASS	T	intron_variant	MODIFIER	PDXDC1	PDXDC1	transcript	XM_038540287.1	protein_coding	12	c.1042-1429C>T
chr6	28708709	C	T	PASS	T	intron_variant	MODIFIER	PDXDC1	PDXDC1	transcript	XM_038540290.1	protein_coding	11	c.919-1429C>T
chr6	29093011	C	T	PASS	T	intron_variant	MODIFIER	LOC102156374	LOC102156374	transcript	XR_005360900.1	pseudogene	1	n.130-213G>A
chr6	29378095	C	T	PASS	T	upstream_gene_variant	MODIFIER	MRTFB	MRTFB	transcript	XM_038540303.1	protein_coding	-1	c.-613G>A
chr6	29378095	C	T	PASS	T	upstream_gene_variant	MODIFIER	MRTFB	MRTFB	transcript	XM_038540305.1	protein_coding	-1	c.-775G>A
chr6	29378095	C	T	PASS	T	intron_variant	MODIFIER	MRTFB	MRTFB	transcript	XM_038540302.1	protein_coding	1	c.-128+550G>A
chr6	29378095	C	T	PASS	T	intron_variant	MODIFIER	MRTFB	MRTFB	transcript	XM_038540314.1	protein_coding	1	c.-128+550G>A
chr6	29378095	C	T	PASS	T	intron_variant	MODIFIER	MRTFB	MRTFB	transcript	XM_038540310.1	protein_coding	1	c.-128+550G>A
chr6	29378095	C	T	PASS	T	intron_variant	MODIFIER	MRTFB	MRTFB	transcript	XM_038540312.1	protein_coding	1	c.-128+550G>A
chr6	29378095	C	T	PASS	T	intron_variant	MODIFIER	MRTFB	MRTFB	transcript	XM_038540313.1	protein_coding	1	c.-128+550G>A
chr6	29378095	C	T	PASS	T	intron_variant	MODIFIER	MRTFB	MRTFB	transcript	XM_038540306.1	protein_coding	1	c.-290+6955G>A
chr6	29378095	C	T	PASS	T	intron_variant	MODIFIER	MRTFB	MRTFB	transcript	XM_038540304.1	protein_coding	1	c.-128+6955G>A
chr6	30838270	T	A	PASS	A	intron_variant	MODIFIER	SNX29	SNX29	transcript	XM_038540323.1	protein_coding	15	c.1788+20260A>T
chr6	30838270	T	A	PASS	A	intron_variant	MODIFIER	SNX29	SNX29	transcript	XM_038540328.1	protein_coding	15	c.1788+20260A>T
chr6	30838270	T	A	PASS	A	intron_variant	MODIFIER	SNX29	SNX29	transcript	XM_038540325.1	protein_coding	15	c.1743+20260A>T
chr6	30838270	T	A	PASS	A	intron_variant	MODIFIER	SNX29	SNX29	transcript	XM_038540324.1	protein_coding	15	c.1773+20260A>T
chr6	30838270	T	A	PASS	A	intron_variant	MODIFIER	SNX29	SNX29	transcript	XM_038540327.1	protein_coding	15	c.1788+20260A>T
chr6	30838270	T	A	PASS	A	intron_variant	MODIFIER	SNX29	SNX29	transcript	XM_038540326.1	protein_coding	15	c.1788+20260A>T
chr6	30838270	T	A	PASS	A	intron_variant	MODIFIER	SNX29	SNX29	transcript	XM_038540329.1	protein_coding	15	c.1788+20260A>T
chr6	30838270	T	A	PASS	A	intron_variant	MODIFIER	SNX29	SNX29	transcript	XM_038540330.1	protein_coding	15	c.1788+20260A>T
chr6	31725966	T	C	PASS	C	intron_variant	MODIFIER	LOC119872199	LOC119872199	transcript	XR_005360912.1	pseudogene	2	n.3466+1441A>G
chr6	31725966	T	C	PASS	C	intron_variant	MODIFIER	LOC119872199	LOC119872199	transcript	XR_005360911.1	pseudogene	2	n.3466+1441A>G
chr6	31725966	T	C	PASS	C	intron_variant	MODIFIER	LOC119872199	LOC119872199	transcript	XR_005360914.1	pseudogene	2	n.3466+1441A>G
chr6	33139810	A	C	PASS	C	intergenic_region	MODIFIER	GRIN2A-C6H16orf72	GRIN2A-C6H16orf72	intergenic_region	GRIN2A_3-C6H16orf72_3		-1	n.33139810A>C
chr6	33174509	C	T	PASS	T	intergenic_region	MODIFIER	GRIN2A-C6H16orf72	GRIN2A-C6H16orf72	intergenic_region	GRIN2A_3-C6H16orf72_3		-1	n.33174509C>T
chr6	33210195	G	A	PASS	A	intergenic_region	MODIFIER	GRIN2A-C6H16orf72	GRIN2A-C6H16orf72	intergenic_region	GRIN2A_3-C6H16orf72_3		-1	n.33210195G>A
chr6	33309615	G	A	PASS	A	intergenic_region	MODIFIER	GRIN2A-C6H16orf72	GRIN2A-C6H16orf72	intergenic_region	GRIN2A_3-C6H16orf72_3		-1	n.33309615G>A
chr6	33354110	G	A	PASS	A	intergenic_region	MODIFIER	GRIN2A-C6H16orf72	GRIN2A-C6H16orf72	intergenic_region	GRIN2A_3-C6H16orf72_3		-1	n.33354110G>A
chr6	33413997	C	T	PASS	T	downstream_gene_variant	MODIFIER	C6H16orf72	C6H16orf72	transcript	XM_038540405.1	protein_coding	-1	c.*7184G>A
chr6	33413997	C	T	PASS	T	downstream_gene_variant	MODIFIER	C6H16orf72	C6H16orf72	transcript	XM_038540406.1	protein_coding	-1	c.*7184G>A
chr6	33413997	C	T	PASS	T	intergenic_region	MODIFIER	GRIN2A-C6H16orf72	GRIN2A-C6H16orf72	intergenic_region	GRIN2A_3-C6H16orf72_3		-1	n.33413997C>T
chr6	33497732	T	C	PASS	C	intergenic_region	MODIFIER	C6H16orf72-USP7	C6H16orf72-USP7	intergenic_region	C6H16orf72_3-USP7_3		-1	n.33497732T>C
chr6	33629890	C	T	PASS	T	upstream_gene_variant	MODIFIER	CARHSP1	CARHSP1	transcript	XM_038540432.1	protein_coding	-1	c.-1861C>T
chr6	33629890	C	T	PASS	T	downstream_gene_variant	MODIFIER	LOC111096306	LOC111096306	transcript	XR_005360923.1	pseudogene	-1	n.*3694G>A
chr6	33629890	C	T	PASS	T	intron_variant	MODIFIER	CARHSP1	CARHSP1	transcript	XM_038540433.1	protein_coding	1	c.-105-1481C>T
chr6	33629890	C	T	PASS	T	intron_variant	MODIFIER	CARHSP1	CARHSP1	transcript	XM_038540434.1	protein_coding	1	c.-106+216C>T
chr6	33714760	C	T	PASS	T	intron_variant	MODIFIER	ABAT	ABAT	transcript	XM_038540409.1	protein_coding	2	c.70+3721G>A
chr6	33714760	C	T	PASS	T	intron_variant	MODIFIER	ABAT	ABAT	transcript	XM_038540410.1	protein_coding	2	c.70+3721G>A
chr6	33714760	C	T	PASS	T	intron_variant	MODIFIER	ABAT	ABAT	transcript	XM_038540411.1	protein_coding	2	c.70+3721G>A
chr6	33714760	C	T	PASS	T	intragenic_variant	MODIFIER	LOC111096467	LOC111096467	gene_variant	LOC111096467_3		-1	n.33714760C>T
chr6	33728615	G	A	PASS	A	upstream_gene_variant	MODIFIER	ABAT	ABAT	transcript	XM_038540410.1	protein_coding	-1	c.-2211C>T
chr6	33728615	G	A	PASS	A	intron_variant	MODIFIER	ABAT	ABAT	transcript	XM_038540409.1	protein_coding	1	c.-45-10020C>T
chr6	33728615	G	A	PASS	A	intron_variant	MODIFIER	ABAT	ABAT	transcript	XM_038540411.1	protein_coding	1	c.-46+6184C>T
chr6	33763392	G	A	PASS	A	downstream_gene_variant	MODIFIER	METTL22	METTL22	transcript	XR_005360921.1	pseudogene	-1	n.*1603C>T
chr6	33763392	G	A	PASS	A	downstream_gene_variant	MODIFIER	METTL22	METTL22	transcript	XR_005360922.1	pseudogene	-1	n.*1603C>T
chr6	33763392	G	A	PASS	A	intron_variant	MODIFIER	ABAT	ABAT	transcript	XM_038540409.1	protein_coding	1	c.-46+523C>T
chr6	33850156	C	T	PASS	T	intergenic_region	MODIFIER	TMEM114-RBFOX1	TMEM114-RBFOX1	intergenic_region	TMEM114_3-RBFOX1_3		-1	n.33850156C>T
chr6	33914055	G	A	PASS	A	intergenic_region	MODIFIER	TMEM114-RBFOX1	TMEM114-RBFOX1	intergenic_region	TMEM114_3-RBFOX1_3		-1	n.33914055G>A
chr6	34016151	T	TAAAAACCTGGTGAGCAAAAAAAAAAAAAAAAAAAAAAAAAAAAAAAAAAAAAA	PASS	TAAAAACCTGGTGAGCAAAAAAAAAAAAAAAAAAAAAAAAAAAAAAAAAAAAAA	intergenic_region	MODIFIER	TMEM114-RBFOX1	TMEM114-RBFOX1	intergenic_region	TMEM114_3-RBFOX1_3		-1	n.34016151_34016152insAAAAACCTGGTGAGCAAAAAAAAAAAAAAAAAAAAAAAAAAAAAAAAAAAAAA
chr6	34145719	C	T	PASS	T	intergenic_region	MODIFIER	TMEM114-RBFOX1	TMEM114-RBFOX1	intergenic_region	TMEM114_3-RBFOX1_3		-1	n.34145719C>T
chr6	34156526	G	A	PASS	A	intergenic_region	MODIFIER	TMEM114-RBFOX1	TMEM114-RBFOX1	intergenic_region	TMEM114_3-RBFOX1_3		-1	n.34156526G>A
chr6	34386410	A	C	PASS	C	intergenic_region	MODIFIER	TMEM114-RBFOX1	TMEM114-RBFOX1	intergenic_region	TMEM114_3-RBFOX1_3		-1	n.34386410A>C
chr6	34445772	T	C	PASS	C	intergenic_region	MODIFIER	TMEM114-RBFOX1	TMEM114-RBFOX1	intergenic_region	TMEM114_3-RBFOX1_3		-1	n.34445772T>C
chr6	34460149	C	T	PASS	T	intergenic_region	MODIFIER	TMEM114-RBFOX1	TMEM114-RBFOX1	intergenic_region	TMEM114_3-RBFOX1_3		-1	n.34460149C>T
chr6	34487304	C	T	PASS	T	intergenic_region	MODIFIER	TMEM114-RBFOX1	TMEM114-RBFOX1	intergenic_region	TMEM114_3-RBFOX1_3		-1	n.34487304C>T
chr6	34496219	G	C	PASS	C	intergenic_region	MODIFIER	TMEM114-RBFOX1	TMEM114-RBFOX1	intergenic_region	TMEM114_3-RBFOX1_3		-1	n.34496219G>C
chr6	34497337	G	A	PASS	A	intergenic_region	MODIFIER	TMEM114-RBFOX1	TMEM114-RBFOX1	intergenic_region	TMEM114_3-RBFOX1_3		-1	n.34497337G>A
chr6	34501639	G	A	PASS	A	intergenic_region	MODIFIER	TMEM114-RBFOX1	TMEM114-RBFOX1	intergenic_region	TMEM114_3-RBFOX1_3		-1	n.34501639G>A
chr6	34502514	A	G	PASS	G	intergenic_region	MODIFIER	TMEM114-RBFOX1	TMEM114-RBFOX1	intergenic_region	TMEM114_3-RBFOX1_3		-1	n.34502514A>G
chr6	34502523	T	C	PASS	C	intergenic_region	MODIFIER	TMEM114-RBFOX1	TMEM114-RBFOX1	intergenic_region	TMEM114_3-RBFOX1_3		-1	n.34502523T>C
chr6	34503120	C	A	PASS	A	intergenic_region	MODIFIER	TMEM114-RBFOX1	TMEM114-RBFOX1	intergenic_region	TMEM114_3-RBFOX1_3		-1	n.34503120C>A
chr6	34503705	T	A	PASS	A	intergenic_region	MODIFIER	TMEM114-RBFOX1	TMEM114-RBFOX1	intergenic_region	TMEM114_3-RBFOX1_3		-1	n.34503705T>A
chr6	34508576	T	G	PASS	G	downstream_gene_variant	MODIFIER	RBFOX1	RBFOX1	transcript	XM_038540451.1	protein_coding	-1	c.*7085A>C
chr6	34508576	T	G	PASS	G	downstream_gene_variant	MODIFIER	RBFOX1	RBFOX1	transcript	XM_038540440.1	protein_coding	-1	c.*7085A>C
chr6	34508576	T	G	PASS	G	downstream_gene_variant	MODIFIER	RBFOX1	RBFOX1	transcript	XM_038540439.1	protein_coding	-1	c.*7085A>C
chr6	34508576	T	G	PASS	G	downstream_gene_variant	MODIFIER	RBFOX1	RBFOX1	transcript	XM_038540446.1	protein_coding	-1	c.*7085A>C
chr6	34508576	T	G	PASS	G	intergenic_region	MODIFIER	TMEM114-RBFOX1	TMEM114-RBFOX1	intergenic_region	TMEM114_3-RBFOX1_3		-1	n.34508576T>G
chr6	34512339	T	A	PASS	A	downstream_gene_variant	MODIFIER	RBFOX1	RBFOX1	transcript	XM_038540435.1	protein_coding	-1	c.*4472A>T
chr6	34512339	T	A	PASS	A	downstream_gene_variant	MODIFIER	RBFOX1	RBFOX1	transcript	XM_038540451.1	protein_coding	-1	c.*3322A>T
chr6	34512339	T	A	PASS	A	downstream_gene_variant	MODIFIER	RBFOX1	RBFOX1	transcript	XM_038540440.1	protein_coding	-1	c.*3322A>T
chr6	34512339	T	A	PASS	A	downstream_gene_variant	MODIFIER	RBFOX1	RBFOX1	transcript	XM_038540439.1	protein_coding	-1	c.*3322A>T
chr6	34512339	T	A	PASS	A	downstream_gene_variant	MODIFIER	RBFOX1	RBFOX1	transcript	XM_038540446.1	protein_coding	-1	c.*3322A>T
chr6	34512339	T	A	PASS	A	downstream_gene_variant	MODIFIER	RBFOX1	RBFOX1	transcript	XM_038540445.1	protein_coding	-1	c.*3444A>T
chr6	34512339	T	A	PASS	A	downstream_gene_variant	MODIFIER	RBFOX1	RBFOX1	transcript	XM_038540450.1	protein_coding	-1	c.*4472A>T
chr6	34512339	T	A	PASS	A	downstream_gene_variant	MODIFIER	RBFOX1	RBFOX1	transcript	XM_038540447.1	protein_coding	-1	c.*4472A>T
chr6	34512339	T	A	PASS	A	downstream_gene_variant	MODIFIER	RBFOX1	RBFOX1	transcript	XM_038540449.1	protein_coding	-1	c.*4472A>T
chr6	34512339	T	A	PASS	A	downstream_gene_variant	MODIFIER	RBFOX1	RBFOX1	transcript	XM_038540448.1	protein_coding	-1	c.*4472A>T
chr6	34512339	T	A	PASS	A	downstream_gene_variant	MODIFIER	RBFOX1	RBFOX1	transcript	XM_038540437.1	protein_coding	-1	c.*4472A>T
chr6	34512339	T	A	PASS	A	downstream_gene_variant	MODIFIER	RBFOX1	RBFOX1	transcript	XM_038540438.1	protein_coding	-1	c.*4472A>T
chr6	34512339	T	A	PASS	A	downstream_gene_variant	MODIFIER	RBFOX1	RBFOX1	transcript	XM_038540441.1	protein_coding	-1	c.*4472A>T
chr6	34512339	T	A	PASS	A	downstream_gene_variant	MODIFIER	RBFOX1	RBFOX1	transcript	XM_038540444.1	protein_coding	-1	c.*4542A>T
chr6	34512339	T	A	PASS	A	downstream_gene_variant	MODIFIER	RBFOX1	RBFOX1	transcript	XM_038540443.1	protein_coding	-1	c.*4542A>T
chr6	34512339	T	A	PASS	A	intergenic_region	MODIFIER	TMEM114-RBFOX1	TMEM114-RBFOX1	intergenic_region	TMEM114_3-RBFOX1_3		-1	n.34512339T>A
chr6	34515991	G	A	PASS	A	downstream_gene_variant	MODIFIER	RBFOX1	RBFOX1	transcript	XM_038540435.1	protein_coding	-1	c.*820C>T
chr6	34515991	G	A	PASS	A	downstream_gene_variant	MODIFIER	RBFOX1	RBFOX1	transcript	XM_038540450.1	protein_coding	-1	c.*820C>T
chr6	34515991	G	A	PASS	A	downstream_gene_variant	MODIFIER	RBFOX1	RBFOX1	transcript	XM_038540447.1	protein_coding	-1	c.*820C>T
chr6	34515991	G	A	PASS	A	downstream_gene_variant	MODIFIER	RBFOX1	RBFOX1	transcript	XM_038540449.1	protein_coding	-1	c.*820C>T
chr6	34515991	G	A	PASS	A	downstream_gene_variant	MODIFIER	RBFOX1	RBFOX1	transcript	XM_038540448.1	protein_coding	-1	c.*820C>T
chr6	34515991	G	A	PASS	A	downstream_gene_variant	MODIFIER	RBFOX1	RBFOX1	transcript	XM_038540437.1	protein_coding	-1	c.*820C>T
chr6	34515991	G	A	PASS	A	downstream_gene_variant	MODIFIER	RBFOX1	RBFOX1	transcript	XM_038540438.1	protein_coding	-1	c.*820C>T
chr6	34515991	G	A	PASS	A	downstream_gene_variant	MODIFIER	RBFOX1	RBFOX1	transcript	XM_038540441.1	protein_coding	-1	c.*820C>T
chr6	34515991	G	A	PASS	A	downstream_gene_variant	MODIFIER	RBFOX1	RBFOX1	transcript	XM_038540444.1	protein_coding	-1	c.*890C>T
chr6	34515991	G	A	PASS	A	downstream_gene_variant	MODIFIER	RBFOX1	RBFOX1	transcript	XM_038540443.1	protein_coding	-1	c.*890C>T
chr6	34515991	G	A	PASS	A	intron_variant	MODIFIER	RBFOX1	RBFOX1	transcript	XM_038540451.1	protein_coding	12	c.1135-208C>T
chr6	34515991	G	A	PASS	A	intron_variant	MODIFIER	RBFOX1	RBFOX1	transcript	XM_038540440.1	protein_coding	18	c.1540-208C>T
chr6	34515991	G	A	PASS	A	intron_variant	MODIFIER	RBFOX1	RBFOX1	transcript	XM_038540439.1	protein_coding	18	c.1543-208C>T
chr6	34515991	G	A	PASS	A	intron_variant	MODIFIER	RBFOX1	RBFOX1	transcript	XM_038540446.1	protein_coding	17	c.1459-208C>T
chr6	34515991	G	A	PASS	A	intron_variant	MODIFIER	RBFOX1	RBFOX1	transcript	XM_038540445.1	protein_coding	19	c.1596-208C>T
chr6	34516195	C	A	PASS	A	downstream_gene_variant	MODIFIER	RBFOX1	RBFOX1	transcript	XM_038540435.1	protein_coding	-1	c.*616G>T
chr6	34516195	C	A	PASS	A	downstream_gene_variant	MODIFIER	RBFOX1	RBFOX1	transcript	XM_038540450.1	protein_coding	-1	c.*616G>T
chr6	34516195	C	A	PASS	A	downstream_gene_variant	MODIFIER	RBFOX1	RBFOX1	transcript	XM_038540447.1	protein_coding	-1	c.*616G>T
chr6	34516195	C	A	PASS	A	downstream_gene_variant	MODIFIER	RBFOX1	RBFOX1	transcript	XM_038540449.1	protein_coding	-1	c.*616G>T
chr6	34516195	C	A	PASS	A	downstream_gene_variant	MODIFIER	RBFOX1	RBFOX1	transcript	XM_038540448.1	protein_coding	-1	c.*616G>T
chr6	34516195	C	A	PASS	A	downstream_gene_variant	MODIFIER	RBFOX1	RBFOX1	transcript	XM_038540437.1	protein_coding	-1	c.*616G>T
chr6	34516195	C	A	PASS	A	downstream_gene_variant	MODIFIER	RBFOX1	RBFOX1	transcript	XM_038540438.1	protein_coding	-1	c.*616G>T
chr6	34516195	C	A	PASS	A	downstream_gene_variant	MODIFIER	RBFOX1	RBFOX1	transcript	XM_038540441.1	protein_coding	-1	c.*616G>T
chr6	34516195	C	A	PASS	A	downstream_gene_variant	MODIFIER	RBFOX1	RBFOX1	transcript	XM_038540444.1	protein_coding	-1	c.*686G>T
chr6	34516195	C	A	PASS	A	downstream_gene_variant	MODIFIER	RBFOX1	RBFOX1	transcript	XM_038540443.1	protein_coding	-1	c.*686G>T
chr6	34516195	C	A	PASS	A	intron_variant	MODIFIER	RBFOX1	RBFOX1	transcript	XM_038540451.1	protein_coding	12	c.1135-412G>T
chr6	34516195	C	A	PASS	A	intron_variant	MODIFIER	RBFOX1	RBFOX1	transcript	XM_038540440.1	protein_coding	18	c.1540-412G>T
chr6	34516195	C	A	PASS	A	intron_variant	MODIFIER	RBFOX1	RBFOX1	transcript	XM_038540439.1	protein_coding	18	c.1543-412G>T
chr6	34516195	C	A	PASS	A	intron_variant	MODIFIER	RBFOX1	RBFOX1	transcript	XM_038540446.1	protein_coding	17	c.1459-412G>T
chr6	34516195	C	A	PASS	A	intron_variant	MODIFIER	RBFOX1	RBFOX1	transcript	XM_038540445.1	protein_coding	19	c.1596-412G>T
chr6	34517523	T	C	PASS	C	intron_variant	MODIFIER	RBFOX1	RBFOX1	transcript	XM_038540435.1	protein_coding	18	c.1520-119A>G
chr6	34517523	T	C	PASS	C	intron_variant	MODIFIER	RBFOX1	RBFOX1	transcript	XM_038540451.1	protein_coding	11	c.1059-119A>G
chr6	34517523	T	C	PASS	C	intron_variant	MODIFIER	RBFOX1	RBFOX1	transcript	XM_038540440.1	protein_coding	17	c.1464-119A>G
chr6	34517523	T	C	PASS	C	intron_variant	MODIFIER	RBFOX1	RBFOX1	transcript	XM_038540439.1	protein_coding	17	c.1467-119A>G
chr6	34517523	T	C	PASS	C	intron_variant	MODIFIER	RBFOX1	RBFOX1	transcript	XM_038540446.1	protein_coding	16	c.1383-119A>G
chr6	34517523	T	C	PASS	C	intron_variant	MODIFIER	RBFOX1	RBFOX1	transcript	XM_038540445.1	protein_coding	18	c.1520-119A>G
chr6	34517523	T	C	PASS	C	intron_variant	MODIFIER	RBFOX1	RBFOX1	transcript	XM_038540450.1	protein_coding	12	c.1112-119A>G
chr6	34517523	T	C	PASS	C	intron_variant	MODIFIER	RBFOX1	RBFOX1	transcript	XM_038540447.1	protein_coding	12	c.1169-119A>G
chr6	34517523	T	C	PASS	C	intron_variant	MODIFIER	RBFOX1	RBFOX1	transcript	XM_038540449.1	protein_coding	13	c.1118-119A>G
chr6	34517523	T	C	PASS	C	intron_variant	MODIFIER	RBFOX1	RBFOX1	transcript	XM_038540448.1	protein_coding	14	c.1160-119A>G
chr6	34517523	T	C	PASS	C	intron_variant	MODIFIER	RBFOX1	RBFOX1	transcript	XM_038540437.1	protein_coding	18	c.1517-119A>G
chr6	34517523	T	C	PASS	C	intron_variant	MODIFIER	RBFOX1	RBFOX1	transcript	XM_038540438.1	protein_coding	17	c.1478-119A>G
chr6	34517523	T	C	PASS	C	intron_variant	MODIFIER	RBFOX1	RBFOX1	transcript	XM_038540441.1	protein_coding	17	c.1439-119A>G
chr6	34517523	T	C	PASS	C	intron_variant	MODIFIER	RBFOX1	RBFOX1	transcript	XM_038540444.1	protein_coding	17	c.1464-119A>G
chr6	34517523	T	C	PASS	C	intron_variant	MODIFIER	RBFOX1	RBFOX1	transcript	XM_038540443.1	protein_coding	17	c.1467-119A>G
chr6	34517573	C	A	PASS	A	intron_variant	MODIFIER	RBFOX1	RBFOX1	transcript	XM_038540435.1	protein_coding	18	c.1520-169G>T
chr6	34517573	C	A	PASS	A	intron_variant	MODIFIER	RBFOX1	RBFOX1	transcript	XM_038540451.1	protein_coding	11	c.1059-169G>T
chr6	34517573	C	A	PASS	A	intron_variant	MODIFIER	RBFOX1	RBFOX1	transcript	XM_038540440.1	protein_coding	17	c.1464-169G>T
chr6	34517573	C	A	PASS	A	intron_variant	MODIFIER	RBFOX1	RBFOX1	transcript	XM_038540439.1	protein_coding	17	c.1467-169G>T
chr6	34517573	C	A	PASS	A	intron_variant	MODIFIER	RBFOX1	RBFOX1	transcript	XM_038540446.1	protein_coding	16	c.1383-169G>T
chr6	34517573	C	A	PASS	A	intron_variant	MODIFIER	RBFOX1	RBFOX1	transcript	XM_038540445.1	protein_coding	18	c.1520-169G>T
chr6	34517573	C	A	PASS	A	intron_variant	MODIFIER	RBFOX1	RBFOX1	transcript	XM_038540450.1	protein_coding	12	c.1112-169G>T
chr6	34517573	C	A	PASS	A	intron_variant	MODIFIER	RBFOX1	RBFOX1	transcript	XM_038540447.1	protein_coding	12	c.1169-169G>T
chr6	34517573	C	A	PASS	A	intron_variant	MODIFIER	RBFOX1	RBFOX1	transcript	XM_038540449.1	protein_coding	13	c.1118-169G>T
chr6	34517573	C	A	PASS	A	intron_variant	MODIFIER	RBFOX1	RBFOX1	transcript	XM_038540448.1	protein_coding	14	c.1160-169G>T
chr6	34517573	C	A	PASS	A	intron_variant	MODIFIER	RBFOX1	RBFOX1	transcript	XM_038540437.1	protein_coding	18	c.1517-169G>T
chr6	34517573	C	A	PASS	A	intron_variant	MODIFIER	RBFOX1	RBFOX1	transcript	XM_038540438.1	protein_coding	17	c.1478-169G>T
chr6	34517573	C	A	PASS	A	intron_variant	MODIFIER	RBFOX1	RBFOX1	transcript	XM_038540441.1	protein_coding	17	c.1439-169G>T
chr6	34517573	C	A	PASS	A	intron_variant	MODIFIER	RBFOX1	RBFOX1	transcript	XM_038540444.1	protein_coding	17	c.1464-169G>T
chr6	34517573	C	A	PASS	A	intron_variant	MODIFIER	RBFOX1	RBFOX1	transcript	XM_038540443.1	protein_coding	17	c.1467-169G>T
chr6	34517585	C	T	PASS	T	intron_variant	MODIFIER	RBFOX1	RBFOX1	transcript	XM_038540435.1	protein_coding	18	c.1520-181G>A
chr6	34517585	C	T	PASS	T	intron_variant	MODIFIER	RBFOX1	RBFOX1	transcript	XM_038540451.1	protein_coding	11	c.1059-181G>A
chr6	34517585	C	T	PASS	T	intron_variant	MODIFIER	RBFOX1	RBFOX1	transcript	XM_038540440.1	protein_coding	17	c.1464-181G>A
chr6	34517585	C	T	PASS	T	intron_variant	MODIFIER	RBFOX1	RBFOX1	transcript	XM_038540439.1	protein_coding	17	c.1467-181G>A
chr6	34517585	C	T	PASS	T	intron_variant	MODIFIER	RBFOX1	RBFOX1	transcript	XM_038540446.1	protein_coding	16	c.1383-181G>A
chr6	34517585	C	T	PASS	T	intron_variant	MODIFIER	RBFOX1	RBFOX1	transcript	XM_038540445.1	protein_coding	18	c.1520-181G>A
chr6	34517585	C	T	PASS	T	intron_variant	MODIFIER	RBFOX1	RBFOX1	transcript	XM_038540450.1	protein_coding	12	c.1112-181G>A
chr6	34517585	C	T	PASS	T	intron_variant	MODIFIER	RBFOX1	RBFOX1	transcript	XM_038540447.1	protein_coding	12	c.1169-181G>A
chr6	34517585	C	T	PASS	T	intron_variant	MODIFIER	RBFOX1	RBFOX1	transcript	XM_038540449.1	protein_coding	13	c.1118-181G>A
chr6	34517585	C	T	PASS	T	intron_variant	MODIFIER	RBFOX1	RBFOX1	transcript	XM_038540448.1	protein_coding	14	c.1160-181G>A
chr6	34517585	C	T	PASS	T	intron_variant	MODIFIER	RBFOX1	RBFOX1	transcript	XM_038540437.1	protein_coding	18	c.1517-181G>A
chr6	34517585	C	T	PASS	T	intron_variant	MODIFIER	RBFOX1	RBFOX1	transcript	XM_038540438.1	protein_coding	17	c.1478-181G>A
chr6	34517585	C	T	PASS	T	intron_variant	MODIFIER	RBFOX1	RBFOX1	transcript	XM_038540441.1	protein_coding	17	c.1439-181G>A
chr6	34517585	C	T	PASS	T	intron_variant	MODIFIER	RBFOX1	RBFOX1	transcript	XM_038540444.1	protein_coding	17	c.1464-181G>A
chr6	34517585	C	T	PASS	T	intron_variant	MODIFIER	RBFOX1	RBFOX1	transcript	XM_038540443.1	protein_coding	17	c.1467-181G>A
chr6	34517907	C	T	PASS	T	intron_variant	MODIFIER	RBFOX1	RBFOX1	transcript	XM_038540435.1	protein_coding	18	c.1520-503G>A
chr6	34517907	C	T	PASS	T	intron_variant	MODIFIER	RBFOX1	RBFOX1	transcript	XM_038540451.1	protein_coding	11	c.1059-503G>A
chr6	34517907	C	T	PASS	T	intron_variant	MODIFIER	RBFOX1	RBFOX1	transcript	XM_038540440.1	protein_coding	17	c.1464-503G>A
chr6	34517907	C	T	PASS	T	intron_variant	MODIFIER	RBFOX1	RBFOX1	transcript	XM_038540439.1	protein_coding	17	c.1467-503G>A
chr6	34517907	C	T	PASS	T	intron_variant	MODIFIER	RBFOX1	RBFOX1	transcript	XM_038540446.1	protein_coding	16	c.1383-503G>A
chr6	34517907	C	T	PASS	T	intron_variant	MODIFIER	RBFOX1	RBFOX1	transcript	XM_038540445.1	protein_coding	18	c.1520-503G>A
chr6	34517907	C	T	PASS	T	intron_variant	MODIFIER	RBFOX1	RBFOX1	transcript	XM_038540450.1	protein_coding	12	c.1112-503G>A
chr6	34517907	C	T	PASS	T	intron_variant	MODIFIER	RBFOX1	RBFOX1	transcript	XM_038540447.1	protein_coding	12	c.1169-503G>A
chr6	34517907	C	T	PASS	T	intron_variant	MODIFIER	RBFOX1	RBFOX1	transcript	XM_038540449.1	protein_coding	13	c.1118-503G>A
chr6	34517907	C	T	PASS	T	intron_variant	MODIFIER	RBFOX1	RBFOX1	transcript	XM_038540448.1	protein_coding	14	c.1160-503G>A
chr6	34517907	C	T	PASS	T	intron_variant	MODIFIER	RBFOX1	RBFOX1	transcript	XM_038540437.1	protein_coding	18	c.1517-503G>A
chr6	34517907	C	T	PASS	T	intron_variant	MODIFIER	RBFOX1	RBFOX1	transcript	XM_038540438.1	protein_coding	17	c.1478-503G>A
chr6	34517907	C	T	PASS	T	intron_variant	MODIFIER	RBFOX1	RBFOX1	transcript	XM_038540441.1	protein_coding	17	c.1439-503G>A
chr6	34517907	C	T	PASS	T	intron_variant	MODIFIER	RBFOX1	RBFOX1	transcript	XM_038540444.1	protein_coding	17	c.1464-503G>A
chr6	34517907	C	T	PASS	T	intron_variant	MODIFIER	RBFOX1	RBFOX1	transcript	XM_038540443.1	protein_coding	17	c.1467-503G>A
chr6	34518031	T	C	PASS	C	intron_variant	MODIFIER	RBFOX1	RBFOX1	transcript	XM_038540435.1	protein_coding	18	c.1520-627A>G
chr6	34518031	T	C	PASS	C	intron_variant	MODIFIER	RBFOX1	RBFOX1	transcript	XM_038540451.1	protein_coding	11	c.1059-627A>G
chr6	34518031	T	C	PASS	C	intron_variant	MODIFIER	RBFOX1	RBFOX1	transcript	XM_038540440.1	protein_coding	17	c.1464-627A>G
chr6	34518031	T	C	PASS	C	intron_variant	MODIFIER	RBFOX1	RBFOX1	transcript	XM_038540439.1	protein_coding	17	c.1467-627A>G
chr6	34518031	T	C	PASS	C	intron_variant	MODIFIER	RBFOX1	RBFOX1	transcript	XM_038540446.1	protein_coding	16	c.1383-627A>G
chr6	34518031	T	C	PASS	C	intron_variant	MODIFIER	RBFOX1	RBFOX1	transcript	XM_038540445.1	protein_coding	18	c.1520-627A>G
chr6	34518031	T	C	PASS	C	intron_variant	MODIFIER	RBFOX1	RBFOX1	transcript	XM_038540450.1	protein_coding	12	c.1112-627A>G
chr6	34518031	T	C	PASS	C	intron_variant	MODIFIER	RBFOX1	RBFOX1	transcript	XM_038540447.1	protein_coding	12	c.1169-627A>G
chr6	34518031	T	C	PASS	C	intron_variant	MODIFIER	RBFOX1	RBFOX1	transcript	XM_038540449.1	protein_coding	13	c.1118-627A>G
chr6	34518031	T	C	PASS	C	intron_variant	MODIFIER	RBFOX1	RBFOX1	transcript	XM_038540448.1	protein_coding	14	c.1160-627A>G
chr6	34518031	T	C	PASS	C	intron_variant	MODIFIER	RBFOX1	RBFOX1	transcript	XM_038540437.1	protein_coding	18	c.1517-627A>G
chr6	34518031	T	C	PASS	C	intron_variant	MODIFIER	RBFOX1	RBFOX1	transcript	XM_038540438.1	protein_coding	17	c.1478-627A>G
chr6	34518031	T	C	PASS	C	intron_variant	MODIFIER	RBFOX1	RBFOX1	transcript	XM_038540441.1	protein_coding	17	c.1439-627A>G
chr6	34518031	T	C	PASS	C	intron_variant	MODIFIER	RBFOX1	RBFOX1	transcript	XM_038540444.1	protein_coding	17	c.1464-627A>G
chr6	34518031	T	C	PASS	C	intron_variant	MODIFIER	RBFOX1	RBFOX1	transcript	XM_038540443.1	protein_coding	17	c.1467-627A>G
chr6	34519719	G	A	PASS	A	intron_variant	MODIFIER	RBFOX1	RBFOX1	transcript	XM_038540435.1	protein_coding	18	c.1520-2315C>T
chr6	34519719	G	A	PASS	A	intron_variant	MODIFIER	RBFOX1	RBFOX1	transcript	XM_038540451.1	protein_coding	11	c.1059-2315C>T
chr6	34519719	G	A	PASS	A	intron_variant	MODIFIER	RBFOX1	RBFOX1	transcript	XM_038540440.1	protein_coding	17	c.1464-2315C>T
chr6	34519719	G	A	PASS	A	intron_variant	MODIFIER	RBFOX1	RBFOX1	transcript	XM_038540439.1	protein_coding	17	c.1467-2315C>T
chr6	34519719	G	A	PASS	A	intron_variant	MODIFIER	RBFOX1	RBFOX1	transcript	XM_038540446.1	protein_coding	16	c.1383-2315C>T
chr6	34519719	G	A	PASS	A	intron_variant	MODIFIER	RBFOX1	RBFOX1	transcript	XM_038540445.1	protein_coding	18	c.1520-2315C>T
chr6	34519719	G	A	PASS	A	intron_variant	MODIFIER	RBFOX1	RBFOX1	transcript	XM_038540450.1	protein_coding	12	c.1112-2315C>T
chr6	34519719	G	A	PASS	A	intron_variant	MODIFIER	RBFOX1	RBFOX1	transcript	XM_038540447.1	protein_coding	12	c.1169-2315C>T
chr6	34519719	G	A	PASS	A	intron_variant	MODIFIER	RBFOX1	RBFOX1	transcript	XM_038540449.1	protein_coding	13	c.1118-2315C>T
chr6	34519719	G	A	PASS	A	intron_variant	MODIFIER	RBFOX1	RBFOX1	transcript	XM_038540448.1	protein_coding	14	c.1160-2315C>T
chr6	34519719	G	A	PASS	A	intron_variant	MODIFIER	RBFOX1	RBFOX1	transcript	XM_038540437.1	protein_coding	18	c.1517-2315C>T
chr6	34519719	G	A	PASS	A	intron_variant	MODIFIER	RBFOX1	RBFOX1	transcript	XM_038540438.1	protein_coding	17	c.1478-2315C>T
chr6	34519719	G	A	PASS	A	intron_variant	MODIFIER	RBFOX1	RBFOX1	transcript	XM_038540441.1	protein_coding	17	c.1439-2315C>T
chr6	34519719	G	A	PASS	A	intron_variant	MODIFIER	RBFOX1	RBFOX1	transcript	XM_038540444.1	protein_coding	17	c.1464-2315C>T
chr6	34519719	G	A	PASS	A	intron_variant	MODIFIER	RBFOX1	RBFOX1	transcript	XM_038540443.1	protein_coding	17	c.1467-2315C>T
chr6	34531810	A	G	PASS	G	intron_variant	MODIFIER	RBFOX1	RBFOX1	transcript	XM_038540435.1	protein_coding	17	c.1467-80T>C
chr6	34531810	A	G	PASS	G	intron_variant	MODIFIER	RBFOX1	RBFOX1	transcript	XM_038540451.1	protein_coding	11	c.1059-14406T>C
chr6	34531810	A	G	PASS	G	intron_variant	MODIFIER	RBFOX1	RBFOX1	transcript	XM_038540440.1	protein_coding	17	c.1464-14406T>C
chr6	34531810	A	G	PASS	G	intron_variant	MODIFIER	RBFOX1	RBFOX1	transcript	XM_038540439.1	protein_coding	17	c.1467-14406T>C
chr6	34531810	A	G	PASS	G	intron_variant	MODIFIER	RBFOX1	RBFOX1	transcript	XM_038540446.1	protein_coding	16	c.1383-14406T>C
chr6	34531810	A	G	PASS	G	intron_variant	MODIFIER	RBFOX1	RBFOX1	transcript	XM_038540445.1	protein_coding	17	c.1467-80T>C
chr6	34531810	A	G	PASS	G	intron_variant	MODIFIER	RBFOX1	RBFOX1	transcript	XM_038540450.1	protein_coding	11	c.1059-80T>C
chr6	34531810	A	G	PASS	G	intron_variant	MODIFIER	RBFOX1	RBFOX1	transcript	XM_038540447.1	protein_coding	11	c.1116-80T>C
chr6	34531810	A	G	PASS	G	intron_variant	MODIFIER	RBFOX1	RBFOX1	transcript	XM_038540449.1	protein_coding	12	c.1065-80T>C
chr6	34531810	A	G	PASS	G	intron_variant	MODIFIER	RBFOX1	RBFOX1	transcript	XM_038540448.1	protein_coding	13	c.1107-80T>C
chr6	34531810	A	G	PASS	G	intron_variant	MODIFIER	RBFOX1	RBFOX1	transcript	XM_038540437.1	protein_coding	17	c.1464-80T>C
chr6	34531810	A	G	PASS	G	intron_variant	MODIFIER	RBFOX1	RBFOX1	transcript	XM_038540438.1	protein_coding	16	c.1425-80T>C
chr6	34531810	A	G	PASS	G	intron_variant	MODIFIER	RBFOX1	RBFOX1	transcript	XM_038540441.1	protein_coding	16	c.1386-80T>C
chr6	34531810	A	G	PASS	G	intron_variant	MODIFIER	RBFOX1	RBFOX1	transcript	XM_038540444.1	protein_coding	17	c.1464-14406T>C
chr6	34531810	A	G	PASS	G	intron_variant	MODIFIER	RBFOX1	RBFOX1	transcript	XM_038540443.1	protein_coding	17	c.1467-14406T>C
chr6	34532381	C	T	PASS	T	intron_variant	MODIFIER	RBFOX1	RBFOX1	transcript	XM_038540435.1	protein_coding	17	c.1467-651G>A
chr6	34532381	C	T	PASS	T	intron_variant	MODIFIER	RBFOX1	RBFOX1	transcript	XM_038540451.1	protein_coding	11	c.1059-14977G>A
chr6	34532381	C	T	PASS	T	intron_variant	MODIFIER	RBFOX1	RBFOX1	transcript	XM_038540440.1	protein_coding	17	c.1464-14977G>A
chr6	34532381	C	T	PASS	T	intron_variant	MODIFIER	RBFOX1	RBFOX1	transcript	XM_038540439.1	protein_coding	17	c.1467-14977G>A
chr6	34532381	C	T	PASS	T	intron_variant	MODIFIER	RBFOX1	RBFOX1	transcript	XM_038540446.1	protein_coding	16	c.1383-14977G>A
chr6	34532381	C	T	PASS	T	intron_variant	MODIFIER	RBFOX1	RBFOX1	transcript	XM_038540445.1	protein_coding	17	c.1467-651G>A
chr6	34532381	C	T	PASS	T	intron_variant	MODIFIER	RBFOX1	RBFOX1	transcript	XM_038540450.1	protein_coding	11	c.1059-651G>A
chr6	34532381	C	T	PASS	T	intron_variant	MODIFIER	RBFOX1	RBFOX1	transcript	XM_038540447.1	protein_coding	11	c.1116-651G>A
chr6	34532381	C	T	PASS	T	intron_variant	MODIFIER	RBFOX1	RBFOX1	transcript	XM_038540449.1	protein_coding	12	c.1065-651G>A
chr6	34532381	C	T	PASS	T	intron_variant	MODIFIER	RBFOX1	RBFOX1	transcript	XM_038540448.1	protein_coding	13	c.1107-651G>A
chr6	34532381	C	T	PASS	T	intron_variant	MODIFIER	RBFOX1	RBFOX1	transcript	XM_038540437.1	protein_coding	17	c.1464-651G>A
chr6	34532381	C	T	PASS	T	intron_variant	MODIFIER	RBFOX1	RBFOX1	transcript	XM_038540438.1	protein_coding	16	c.1425-651G>A
chr6	34532381	C	T	PASS	T	intron_variant	MODIFIER	RBFOX1	RBFOX1	transcript	XM_038540441.1	protein_coding	16	c.1386-651G>A
chr6	34532381	C	T	PASS	T	intron_variant	MODIFIER	RBFOX1	RBFOX1	transcript	XM_038540444.1	protein_coding	17	c.1464-14977G>A
chr6	34532381	C	T	PASS	T	intron_variant	MODIFIER	RBFOX1	RBFOX1	transcript	XM_038540443.1	protein_coding	17	c.1467-14977G>A
chr6	34532793	G	A	PASS	A	intron_variant	MODIFIER	RBFOX1	RBFOX1	transcript	XM_038540435.1	protein_coding	17	c.1467-1063C>T
chr6	34532793	G	A	PASS	A	intron_variant	MODIFIER	RBFOX1	RBFOX1	transcript	XM_038540451.1	protein_coding	11	c.1059-15389C>T
chr6	34532793	G	A	PASS	A	intron_variant	MODIFIER	RBFOX1	RBFOX1	transcript	XM_038540440.1	protein_coding	17	c.1464-15389C>T
chr6	34532793	G	A	PASS	A	intron_variant	MODIFIER	RBFOX1	RBFOX1	transcript	XM_038540439.1	protein_coding	17	c.1467-15389C>T
chr6	34532793	G	A	PASS	A	intron_variant	MODIFIER	RBFOX1	RBFOX1	transcript	XM_038540446.1	protein_coding	16	c.1383-15389C>T
chr6	34532793	G	A	PASS	A	intron_variant	MODIFIER	RBFOX1	RBFOX1	transcript	XM_038540445.1	protein_coding	17	c.1467-1063C>T
chr6	34532793	G	A	PASS	A	intron_variant	MODIFIER	RBFOX1	RBFOX1	transcript	XM_038540450.1	protein_coding	11	c.1059-1063C>T
chr6	34532793	G	A	PASS	A	intron_variant	MODIFIER	RBFOX1	RBFOX1	transcript	XM_038540447.1	protein_coding	11	c.1116-1063C>T
chr6	34532793	G	A	PASS	A	intron_variant	MODIFIER	RBFOX1	RBFOX1	transcript	XM_038540449.1	protein_coding	12	c.1065-1063C>T
chr6	34532793	G	A	PASS	A	intron_variant	MODIFIER	RBFOX1	RBFOX1	transcript	XM_038540448.1	protein_coding	13	c.1107-1063C>T
chr6	34532793	G	A	PASS	A	intron_variant	MODIFIER	RBFOX1	RBFOX1	transcript	XM_038540437.1	protein_coding	17	c.1464-1063C>T
chr6	34532793	G	A	PASS	A	intron_variant	MODIFIER	RBFOX1	RBFOX1	transcript	XM_038540438.1	protein_coding	16	c.1425-1063C>T
chr6	34532793	G	A	PASS	A	intron_variant	MODIFIER	RBFOX1	RBFOX1	transcript	XM_038540441.1	protein_coding	16	c.1386-1063C>T
chr6	34532793	G	A	PASS	A	intron_variant	MODIFIER	RBFOX1	RBFOX1	transcript	XM_038540444.1	protein_coding	17	c.1464-15389C>T
chr6	34532793	G	A	PASS	A	intron_variant	MODIFIER	RBFOX1	RBFOX1	transcript	XM_038540443.1	protein_coding	17	c.1467-15389C>T
chr6	34532968	AAGTT	A	PASS	A	intron_variant	MODIFIER	RBFOX1	RBFOX1	transcript	XM_038540435.1	protein_coding	17	c.1467-1242_1467-1239delAACT
chr6	34532968	AAGTT	A	PASS	A	intron_variant	MODIFIER	RBFOX1	RBFOX1	transcript	XM_038540451.1	protein_coding	11	c.1059-15568_1059-15565delAACT
chr6	34532968	AAGTT	A	PASS	A	intron_variant	MODIFIER	RBFOX1	RBFOX1	transcript	XM_038540440.1	protein_coding	17	c.1464-15568_1464-15565delAACT
chr6	34532968	AAGTT	A	PASS	A	intron_variant	MODIFIER	RBFOX1	RBFOX1	transcript	XM_038540439.1	protein_coding	17	c.1467-15568_1467-15565delAACT
chr6	34532968	AAGTT	A	PASS	A	intron_variant	MODIFIER	RBFOX1	RBFOX1	transcript	XM_038540446.1	protein_coding	16	c.1383-15568_1383-15565delAACT
chr6	34532968	AAGTT	A	PASS	A	intron_variant	MODIFIER	RBFOX1	RBFOX1	transcript	XM_038540445.1	protein_coding	17	c.1467-1242_1467-1239delAACT
chr6	34532968	AAGTT	A	PASS	A	intron_variant	MODIFIER	RBFOX1	RBFOX1	transcript	XM_038540450.1	protein_coding	11	c.1059-1242_1059-1239delAACT
chr6	34532968	AAGTT	A	PASS	A	intron_variant	MODIFIER	RBFOX1	RBFOX1	transcript	XM_038540447.1	protein_coding	11	c.1116-1242_1116-1239delAACT
chr6	34532968	AAGTT	A	PASS	A	intron_variant	MODIFIER	RBFOX1	RBFOX1	transcript	XM_038540449.1	protein_coding	12	c.1065-1242_1065-1239delAACT
chr6	34532968	AAGTT	A	PASS	A	intron_variant	MODIFIER	RBFOX1	RBFOX1	transcript	XM_038540448.1	protein_coding	13	c.1107-1242_1107-1239delAACT
chr6	34532968	AAGTT	A	PASS	A	intron_variant	MODIFIER	RBFOX1	RBFOX1	transcript	XM_038540437.1	protein_coding	17	c.1464-1242_1464-1239delAACT
chr6	34532968	AAGTT	A	PASS	A	intron_variant	MODIFIER	RBFOX1	RBFOX1	transcript	XM_038540438.1	protein_coding	16	c.1425-1242_1425-1239delAACT
chr6	34532968	AAGTT	A	PASS	A	intron_variant	MODIFIER	RBFOX1	RBFOX1	transcript	XM_038540441.1	protein_coding	16	c.1386-1242_1386-1239delAACT
chr6	34532968	AAGTT	A	PASS	A	intron_variant	MODIFIER	RBFOX1	RBFOX1	transcript	XM_038540444.1	protein_coding	17	c.1464-15568_1464-15565delAACT
chr6	34532968	AAGTT	A	PASS	A	intron_variant	MODIFIER	RBFOX1	RBFOX1	transcript	XM_038540443.1	protein_coding	17	c.1467-15568_1467-15565delAACT
chr6	34536058	C	T	PASS	T	intron_variant	MODIFIER	RBFOX1	RBFOX1	transcript	XM_038540435.1	protein_coding	17	c.1467-4328G>A
chr6	34536058	C	T	PASS	T	intron_variant	MODIFIER	RBFOX1	RBFOX1	transcript	XM_038540451.1	protein_coding	11	c.1058+14712G>A
chr6	34536058	C	T	PASS	T	intron_variant	MODIFIER	RBFOX1	RBFOX1	transcript	XM_038540440.1	protein_coding	17	c.1463+14712G>A
chr6	34536058	C	T	PASS	T	intron_variant	MODIFIER	RBFOX1	RBFOX1	transcript	XM_038540439.1	protein_coding	17	c.1466+14712G>A
chr6	34536058	C	T	PASS	T	intron_variant	MODIFIER	RBFOX1	RBFOX1	transcript	XM_038540446.1	protein_coding	16	c.1382+14712G>A
chr6	34536058	C	T	PASS	T	intron_variant	MODIFIER	RBFOX1	RBFOX1	transcript	XM_038540445.1	protein_coding	17	c.1467-4328G>A
chr6	34536058	C	T	PASS	T	intron_variant	MODIFIER	RBFOX1	RBFOX1	transcript	XM_038540450.1	protein_coding	11	c.1059-4328G>A
chr6	34536058	C	T	PASS	T	intron_variant	MODIFIER	RBFOX1	RBFOX1	transcript	XM_038540447.1	protein_coding	11	c.1116-4328G>A
chr6	34536058	C	T	PASS	T	intron_variant	MODIFIER	RBFOX1	RBFOX1	transcript	XM_038540449.1	protein_coding	12	c.1065-4328G>A
chr6	34536058	C	T	PASS	T	intron_variant	MODIFIER	RBFOX1	RBFOX1	transcript	XM_038540448.1	protein_coding	13	c.1107-4328G>A
chr6	34536058	C	T	PASS	T	intron_variant	MODIFIER	RBFOX1	RBFOX1	transcript	XM_038540437.1	protein_coding	17	c.1464-4328G>A
chr6	34536058	C	T	PASS	T	intron_variant	MODIFIER	RBFOX1	RBFOX1	transcript	XM_038540438.1	protein_coding	16	c.1425-4328G>A
chr6	34536058	C	T	PASS	T	intron_variant	MODIFIER	RBFOX1	RBFOX1	transcript	XM_038540441.1	protein_coding	16	c.1386-4328G>A
chr6	34536058	C	T	PASS	T	intron_variant	MODIFIER	RBFOX1	RBFOX1	transcript	XM_038540444.1	protein_coding	17	c.1463+14712G>A
chr6	34536058	C	T	PASS	T	intron_variant	MODIFIER	RBFOX1	RBFOX1	transcript	XM_038540443.1	protein_coding	17	c.1466+14712G>A
chr6	34536095	G	A	PASS	A	intron_variant	MODIFIER	RBFOX1	RBFOX1	transcript	XM_038540435.1	protein_coding	17	c.1467-4365C>T
chr6	34536095	G	A	PASS	A	intron_variant	MODIFIER	RBFOX1	RBFOX1	transcript	XM_038540451.1	protein_coding	11	c.1058+14675C>T
chr6	34536095	G	A	PASS	A	intron_variant	MODIFIER	RBFOX1	RBFOX1	transcript	XM_038540440.1	protein_coding	17	c.1463+14675C>T
chr6	34536095	G	A	PASS	A	intron_variant	MODIFIER	RBFOX1	RBFOX1	transcript	XM_038540439.1	protein_coding	17	c.1466+14675C>T
chr6	34536095	G	A	PASS	A	intron_variant	MODIFIER	RBFOX1	RBFOX1	transcript	XM_038540446.1	protein_coding	16	c.1382+14675C>T
chr6	34536095	G	A	PASS	A	intron_variant	MODIFIER	RBFOX1	RBFOX1	transcript	XM_038540445.1	protein_coding	17	c.1467-4365C>T
chr6	34536095	G	A	PASS	A	intron_variant	MODIFIER	RBFOX1	RBFOX1	transcript	XM_038540450.1	protein_coding	11	c.1059-4365C>T
chr6	34536095	G	A	PASS	A	intron_variant	MODIFIER	RBFOX1	RBFOX1	transcript	XM_038540447.1	protein_coding	11	c.1116-4365C>T
chr6	34536095	G	A	PASS	A	intron_variant	MODIFIER	RBFOX1	RBFOX1	transcript	XM_038540449.1	protein_coding	12	c.1065-4365C>T
chr6	34536095	G	A	PASS	A	intron_variant	MODIFIER	RBFOX1	RBFOX1	transcript	XM_038540448.1	protein_coding	13	c.1107-4365C>T
chr6	34536095	G	A	PASS	A	intron_variant	MODIFIER	RBFOX1	RBFOX1	transcript	XM_038540437.1	protein_coding	17	c.1464-4365C>T
chr6	34536095	G	A	PASS	A	intron_variant	MODIFIER	RBFOX1	RBFOX1	transcript	XM_038540438.1	protein_coding	16	c.1425-4365C>T
chr6	34536095	G	A	PASS	A	intron_variant	MODIFIER	RBFOX1	RBFOX1	transcript	XM_038540441.1	protein_coding	16	c.1386-4365C>T
chr6	34536095	G	A	PASS	A	intron_variant	MODIFIER	RBFOX1	RBFOX1	transcript	XM_038540444.1	protein_coding	17	c.1463+14675C>T
chr6	34536095	G	A	PASS	A	intron_variant	MODIFIER	RBFOX1	RBFOX1	transcript	XM_038540443.1	protein_coding	17	c.1466+14675C>T
chr6	34536599	C	T	PASS	T	intron_variant	MODIFIER	RBFOX1	RBFOX1	transcript	XM_038540435.1	protein_coding	17	c.1467-4869G>A
chr6	34536599	C	T	PASS	T	intron_variant	MODIFIER	RBFOX1	RBFOX1	transcript	XM_038540451.1	protein_coding	11	c.1058+14171G>A
chr6	34536599	C	T	PASS	T	intron_variant	MODIFIER	RBFOX1	RBFOX1	transcript	XM_038540440.1	protein_coding	17	c.1463+14171G>A
chr6	34536599	C	T	PASS	T	intron_variant	MODIFIER	RBFOX1	RBFOX1	transcript	XM_038540439.1	protein_coding	17	c.1466+14171G>A
chr6	34536599	C	T	PASS	T	intron_variant	MODIFIER	RBFOX1	RBFOX1	transcript	XM_038540446.1	protein_coding	16	c.1382+14171G>A
chr6	34536599	C	T	PASS	T	intron_variant	MODIFIER	RBFOX1	RBFOX1	transcript	XM_038540445.1	protein_coding	17	c.1467-4869G>A
chr6	34536599	C	T	PASS	T	intron_variant	MODIFIER	RBFOX1	RBFOX1	transcript	XM_038540450.1	protein_coding	11	c.1059-4869G>A
chr6	34536599	C	T	PASS	T	intron_variant	MODIFIER	RBFOX1	RBFOX1	transcript	XM_038540447.1	protein_coding	11	c.1116-4869G>A
chr6	34536599	C	T	PASS	T	intron_variant	MODIFIER	RBFOX1	RBFOX1	transcript	XM_038540449.1	protein_coding	12	c.1065-4869G>A
chr6	34536599	C	T	PASS	T	intron_variant	MODIFIER	RBFOX1	RBFOX1	transcript	XM_038540448.1	protein_coding	13	c.1107-4869G>A
chr6	34536599	C	T	PASS	T	intron_variant	MODIFIER	RBFOX1	RBFOX1	transcript	XM_038540437.1	protein_coding	17	c.1464-4869G>A
chr6	34536599	C	T	PASS	T	intron_variant	MODIFIER	RBFOX1	RBFOX1	transcript	XM_038540438.1	protein_coding	16	c.1425-4869G>A
chr6	34536599	C	T	PASS	T	intron_variant	MODIFIER	RBFOX1	RBFOX1	transcript	XM_038540441.1	protein_coding	16	c.1386-4869G>A
chr6	34536599	C	T	PASS	T	intron_variant	MODIFIER	RBFOX1	RBFOX1	transcript	XM_038540444.1	protein_coding	17	c.1463+14171G>A
chr6	34536599	C	T	PASS	T	intron_variant	MODIFIER	RBFOX1	RBFOX1	transcript	XM_038540443.1	protein_coding	17	c.1466+14171G>A
chr6	34537260	T	G	PASS	G	intron_variant	MODIFIER	RBFOX1	RBFOX1	transcript	XM_038540435.1	protein_coding	17	c.1467-5530A>C
chr6	34537260	T	G	PASS	G	intron_variant	MODIFIER	RBFOX1	RBFOX1	transcript	XM_038540451.1	protein_coding	11	c.1058+13510A>C
chr6	34537260	T	G	PASS	G	intron_variant	MODIFIER	RBFOX1	RBFOX1	transcript	XM_038540440.1	protein_coding	17	c.1463+13510A>C
chr6	34537260	T	G	PASS	G	intron_variant	MODIFIER	RBFOX1	RBFOX1	transcript	XM_038540439.1	protein_coding	17	c.1466+13510A>C
chr6	34537260	T	G	PASS	G	intron_variant	MODIFIER	RBFOX1	RBFOX1	transcript	XM_038540446.1	protein_coding	16	c.1382+13510A>C
chr6	34537260	T	G	PASS	G	intron_variant	MODIFIER	RBFOX1	RBFOX1	transcript	XM_038540445.1	protein_coding	17	c.1467-5530A>C
chr6	34537260	T	G	PASS	G	intron_variant	MODIFIER	RBFOX1	RBFOX1	transcript	XM_038540450.1	protein_coding	11	c.1059-5530A>C
chr6	34537260	T	G	PASS	G	intron_variant	MODIFIER	RBFOX1	RBFOX1	transcript	XM_038540447.1	protein_coding	11	c.1116-5530A>C
chr6	34537260	T	G	PASS	G	intron_variant	MODIFIER	RBFOX1	RBFOX1	transcript	XM_038540449.1	protein_coding	12	c.1065-5530A>C
chr6	34537260	T	G	PASS	G	intron_variant	MODIFIER	RBFOX1	RBFOX1	transcript	XM_038540448.1	protein_coding	13	c.1107-5530A>C
chr6	34537260	T	G	PASS	G	intron_variant	MODIFIER	RBFOX1	RBFOX1	transcript	XM_038540437.1	protein_coding	17	c.1464-5530A>C
chr6	34537260	T	G	PASS	G	intron_variant	MODIFIER	RBFOX1	RBFOX1	transcript	XM_038540438.1	protein_coding	16	c.1425-5530A>C
chr6	34537260	T	G	PASS	G	intron_variant	MODIFIER	RBFOX1	RBFOX1	transcript	XM_038540441.1	protein_coding	16	c.1386-5530A>C
chr6	34537260	T	G	PASS	G	intron_variant	MODIFIER	RBFOX1	RBFOX1	transcript	XM_038540444.1	protein_coding	17	c.1463+13510A>C
chr6	34537260	T	G	PASS	G	intron_variant	MODIFIER	RBFOX1	RBFOX1	transcript	XM_038540443.1	protein_coding	17	c.1466+13510A>C
chr6	34539898	CTT	C	PASS	C	intron_variant	MODIFIER	RBFOX1	RBFOX1	transcript	XM_038540435.1	protein_coding	17	c.1467-8170_1467-8169delAA
chr6	34539898	CTT	C	PASS	C	intron_variant	MODIFIER	RBFOX1	RBFOX1	transcript	XM_038540451.1	protein_coding	11	c.1058+10870_1058+10871delAA
chr6	34539898	CTT	C	PASS	C	intron_variant	MODIFIER	RBFOX1	RBFOX1	transcript	XM_038540440.1	protein_coding	17	c.1463+10870_1463+10871delAA
chr6	34539898	CTT	C	PASS	C	intron_variant	MODIFIER	RBFOX1	RBFOX1	transcript	XM_038540439.1	protein_coding	17	c.1466+10870_1466+10871delAA
chr6	34539898	CTT	C	PASS	C	intron_variant	MODIFIER	RBFOX1	RBFOX1	transcript	XM_038540446.1	protein_coding	16	c.1382+10870_1382+10871delAA
chr6	34539898	CTT	C	PASS	C	intron_variant	MODIFIER	RBFOX1	RBFOX1	transcript	XM_038540445.1	protein_coding	17	c.1467-8170_1467-8169delAA
chr6	34539898	CTT	C	PASS	C	intron_variant	MODIFIER	RBFOX1	RBFOX1	transcript	XM_038540450.1	protein_coding	11	c.1059-8170_1059-8169delAA
chr6	34539898	CTT	C	PASS	C	intron_variant	MODIFIER	RBFOX1	RBFOX1	transcript	XM_038540447.1	protein_coding	11	c.1116-8170_1116-8169delAA
chr6	34539898	CTT	C	PASS	C	intron_variant	MODIFIER	RBFOX1	RBFOX1	transcript	XM_038540449.1	protein_coding	12	c.1065-8170_1065-8169delAA
chr6	34539898	CTT	C	PASS	C	intron_variant	MODIFIER	RBFOX1	RBFOX1	transcript	XM_038540448.1	protein_coding	13	c.1107-8170_1107-8169delAA
chr6	34539898	CTT	C	PASS	C	intron_variant	MODIFIER	RBFOX1	RBFOX1	transcript	XM_038540437.1	protein_coding	17	c.1464-8170_1464-8169delAA
chr6	34539898	CTT	C	PASS	C	intron_variant	MODIFIER	RBFOX1	RBFOX1	transcript	XM_038540438.1	protein_coding	16	c.1425-8170_1425-8169delAA
chr6	34539898	CTT	C	PASS	C	intron_variant	MODIFIER	RBFOX1	RBFOX1	transcript	XM_038540441.1	protein_coding	16	c.1386-8170_1386-8169delAA
chr6	34539898	CTT	C	PASS	C	intron_variant	MODIFIER	RBFOX1	RBFOX1	transcript	XM_038540444.1	protein_coding	17	c.1463+10870_1463+10871delAA
chr6	34539898	CTT	C	PASS	C	intron_variant	MODIFIER	RBFOX1	RBFOX1	transcript	XM_038540443.1	protein_coding	17	c.1466+10870_1466+10871delAA
chr6	34540097	A	T	PASS	T	intron_variant	MODIFIER	RBFOX1	RBFOX1	transcript	XM_038540435.1	protein_coding	17	c.1467-8367T>A
chr6	34540097	A	T	PASS	T	intron_variant	MODIFIER	RBFOX1	RBFOX1	transcript	XM_038540451.1	protein_coding	11	c.1058+10673T>A
chr6	34540097	A	T	PASS	T	intron_variant	MODIFIER	RBFOX1	RBFOX1	transcript	XM_038540440.1	protein_coding	17	c.1463+10673T>A
chr6	34540097	A	T	PASS	T	intron_variant	MODIFIER	RBFOX1	RBFOX1	transcript	XM_038540439.1	protein_coding	17	c.1466+10673T>A
chr6	34540097	A	T	PASS	T	intron_variant	MODIFIER	RBFOX1	RBFOX1	transcript	XM_038540446.1	protein_coding	16	c.1382+10673T>A
chr6	34540097	A	T	PASS	T	intron_variant	MODIFIER	RBFOX1	RBFOX1	transcript	XM_038540445.1	protein_coding	17	c.1467-8367T>A
chr6	34540097	A	T	PASS	T	intron_variant	MODIFIER	RBFOX1	RBFOX1	transcript	XM_038540450.1	protein_coding	11	c.1059-8367T>A
chr6	34540097	A	T	PASS	T	intron_variant	MODIFIER	RBFOX1	RBFOX1	transcript	XM_038540447.1	protein_coding	11	c.1116-8367T>A
chr6	34540097	A	T	PASS	T	intron_variant	MODIFIER	RBFOX1	RBFOX1	transcript	XM_038540449.1	protein_coding	12	c.1065-8367T>A
chr6	34540097	A	T	PASS	T	intron_variant	MODIFIER	RBFOX1	RBFOX1	transcript	XM_038540448.1	protein_coding	13	c.1107-8367T>A
chr6	34540097	A	T	PASS	T	intron_variant	MODIFIER	RBFOX1	RBFOX1	transcript	XM_038540437.1	protein_coding	17	c.1464-8367T>A
chr6	34540097	A	T	PASS	T	intron_variant	MODIFIER	RBFOX1	RBFOX1	transcript	XM_038540438.1	protein_coding	16	c.1425-8367T>A
chr6	34540097	A	T	PASS	T	intron_variant	MODIFIER	RBFOX1	RBFOX1	transcript	XM_038540441.1	protein_coding	16	c.1386-8367T>A
chr6	34540097	A	T	PASS	T	intron_variant	MODIFIER	RBFOX1	RBFOX1	transcript	XM_038540444.1	protein_coding	17	c.1463+10673T>A
chr6	34540097	A	T	PASS	T	intron_variant	MODIFIER	RBFOX1	RBFOX1	transcript	XM_038540443.1	protein_coding	17	c.1466+10673T>A
chr6	34540118	T	G	PASS	G	intron_variant	MODIFIER	RBFOX1	RBFOX1	transcript	XM_038540435.1	protein_coding	17	c.1467-8388A>C
chr6	34540118	T	G	PASS	G	intron_variant	MODIFIER	RBFOX1	RBFOX1	transcript	XM_038540451.1	protein_coding	11	c.1058+10652A>C
chr6	34540118	T	G	PASS	G	intron_variant	MODIFIER	RBFOX1	RBFOX1	transcript	XM_038540440.1	protein_coding	17	c.1463+10652A>C
chr6	34540118	T	G	PASS	G	intron_variant	MODIFIER	RBFOX1	RBFOX1	transcript	XM_038540439.1	protein_coding	17	c.1466+10652A>C
chr6	34540118	T	G	PASS	G	intron_variant	MODIFIER	RBFOX1	RBFOX1	transcript	XM_038540446.1	protein_coding	16	c.1382+10652A>C
chr6	34540118	T	G	PASS	G	intron_variant	MODIFIER	RBFOX1	RBFOX1	transcript	XM_038540445.1	protein_coding	17	c.1467-8388A>C
chr6	34540118	T	G	PASS	G	intron_variant	MODIFIER	RBFOX1	RBFOX1	transcript	XM_038540450.1	protein_coding	11	c.1059-8388A>C
chr6	34540118	T	G	PASS	G	intron_variant	MODIFIER	RBFOX1	RBFOX1	transcript	XM_038540447.1	protein_coding	11	c.1116-8388A>C
chr6	34540118	T	G	PASS	G	intron_variant	MODIFIER	RBFOX1	RBFOX1	transcript	XM_038540449.1	protein_coding	12	c.1065-8388A>C
chr6	34540118	T	G	PASS	G	intron_variant	MODIFIER	RBFOX1	RBFOX1	transcript	XM_038540448.1	protein_coding	13	c.1107-8388A>C
chr6	34540118	T	G	PASS	G	intron_variant	MODIFIER	RBFOX1	RBFOX1	transcript	XM_038540437.1	protein_coding	17	c.1464-8388A>C
chr6	34540118	T	G	PASS	G	intron_variant	MODIFIER	RBFOX1	RBFOX1	transcript	XM_038540438.1	protein_coding	16	c.1425-8388A>C
chr6	34540118	T	G	PASS	G	intron_variant	MODIFIER	RBFOX1	RBFOX1	transcript	XM_038540441.1	protein_coding	16	c.1386-8388A>C
chr6	34540118	T	G	PASS	G	intron_variant	MODIFIER	RBFOX1	RBFOX1	transcript	XM_038540444.1	protein_coding	17	c.1463+10652A>C
chr6	34540118	T	G	PASS	G	intron_variant	MODIFIER	RBFOX1	RBFOX1	transcript	XM_038540443.1	protein_coding	17	c.1466+10652A>C
chr6	34540828	T	A	PASS	A	intron_variant	MODIFIER	RBFOX1	RBFOX1	transcript	XM_038540435.1	protein_coding	17	c.1467-9098A>T
chr6	34540828	T	A	PASS	A	intron_variant	MODIFIER	RBFOX1	RBFOX1	transcript	XM_038540451.1	protein_coding	11	c.1058+9942A>T
chr6	34540828	T	A	PASS	A	intron_variant	MODIFIER	RBFOX1	RBFOX1	transcript	XM_038540440.1	protein_coding	17	c.1463+9942A>T
chr6	34540828	T	A	PASS	A	intron_variant	MODIFIER	RBFOX1	RBFOX1	transcript	XM_038540439.1	protein_coding	17	c.1466+9942A>T
chr6	34540828	T	A	PASS	A	intron_variant	MODIFIER	RBFOX1	RBFOX1	transcript	XM_038540446.1	protein_coding	16	c.1382+9942A>T
chr6	34540828	T	A	PASS	A	intron_variant	MODIFIER	RBFOX1	RBFOX1	transcript	XM_038540445.1	protein_coding	17	c.1467-9098A>T
chr6	34540828	T	A	PASS	A	intron_variant	MODIFIER	RBFOX1	RBFOX1	transcript	XM_038540450.1	protein_coding	11	c.1059-9098A>T
chr6	34540828	T	A	PASS	A	intron_variant	MODIFIER	RBFOX1	RBFOX1	transcript	XM_038540447.1	protein_coding	11	c.1116-9098A>T
chr6	34540828	T	A	PASS	A	intron_variant	MODIFIER	RBFOX1	RBFOX1	transcript	XM_038540449.1	protein_coding	12	c.1065-9098A>T
chr6	34540828	T	A	PASS	A	intron_variant	MODIFIER	RBFOX1	RBFOX1	transcript	XM_038540448.1	protein_coding	13	c.1107-9098A>T
chr6	34540828	T	A	PASS	A	intron_variant	MODIFIER	RBFOX1	RBFOX1	transcript	XM_038540437.1	protein_coding	17	c.1464-9098A>T
chr6	34540828	T	A	PASS	A	intron_variant	MODIFIER	RBFOX1	RBFOX1	transcript	XM_038540438.1	protein_coding	16	c.1425-9098A>T
chr6	34540828	T	A	PASS	A	intron_variant	MODIFIER	RBFOX1	RBFOX1	transcript	XM_038540441.1	protein_coding	16	c.1386-9098A>T
chr6	34540828	T	A	PASS	A	intron_variant	MODIFIER	RBFOX1	RBFOX1	transcript	XM_038540444.1	protein_coding	17	c.1463+9942A>T
chr6	34540828	T	A	PASS	A	intron_variant	MODIFIER	RBFOX1	RBFOX1	transcript	XM_038540443.1	protein_coding	17	c.1466+9942A>T
chr6	34542429	C	G	PASS	G	intron_variant	MODIFIER	RBFOX1	RBFOX1	transcript	XM_038540435.1	protein_coding	17	c.1466+8341G>C
chr6	34542429	C	G	PASS	G	intron_variant	MODIFIER	RBFOX1	RBFOX1	transcript	XM_038540451.1	protein_coding	11	c.1058+8341G>C
chr6	34542429	C	G	PASS	G	intron_variant	MODIFIER	RBFOX1	RBFOX1	transcript	XM_038540440.1	protein_coding	17	c.1463+8341G>C
chr6	34542429	C	G	PASS	G	intron_variant	MODIFIER	RBFOX1	RBFOX1	transcript	XM_038540439.1	protein_coding	17	c.1466+8341G>C
chr6	34542429	C	G	PASS	G	intron_variant	MODIFIER	RBFOX1	RBFOX1	transcript	XM_038540446.1	protein_coding	16	c.1382+8341G>C
chr6	34542429	C	G	PASS	G	intron_variant	MODIFIER	RBFOX1	RBFOX1	transcript	XM_038540445.1	protein_coding	17	c.1466+8341G>C
chr6	34542429	C	G	PASS	G	intron_variant	MODIFIER	RBFOX1	RBFOX1	transcript	XM_038540450.1	protein_coding	11	c.1058+8341G>C
chr6	34542429	C	G	PASS	G	intron_variant	MODIFIER	RBFOX1	RBFOX1	transcript	XM_038540447.1	protein_coding	11	c.1115+8341G>C
chr6	34542429	C	G	PASS	G	intron_variant	MODIFIER	RBFOX1	RBFOX1	transcript	XM_038540449.1	protein_coding	12	c.1064+8341G>C
chr6	34542429	C	G	PASS	G	intron_variant	MODIFIER	RBFOX1	RBFOX1	transcript	XM_038540448.1	protein_coding	13	c.1106+8341G>C
chr6	34542429	C	G	PASS	G	intron_variant	MODIFIER	RBFOX1	RBFOX1	transcript	XM_038540437.1	protein_coding	17	c.1463+8341G>C
chr6	34542429	C	G	PASS	G	intron_variant	MODIFIER	RBFOX1	RBFOX1	transcript	XM_038540438.1	protein_coding	16	c.1424+8341G>C
chr6	34542429	C	G	PASS	G	intron_variant	MODIFIER	RBFOX1	RBFOX1	transcript	XM_038540441.1	protein_coding	16	c.1385+8341G>C
chr6	34542429	C	G	PASS	G	intron_variant	MODIFIER	RBFOX1	RBFOX1	transcript	XM_038540444.1	protein_coding	17	c.1463+8341G>C
chr6	34542429	C	G	PASS	G	intron_variant	MODIFIER	RBFOX1	RBFOX1	transcript	XM_038540443.1	protein_coding	17	c.1466+8341G>C
chr6	34547222	G	A	PASS	A	intron_variant	MODIFIER	RBFOX1	RBFOX1	transcript	XM_038540435.1	protein_coding	17	c.1466+3548C>T
chr6	34547222	G	A	PASS	A	intron_variant	MODIFIER	RBFOX1	RBFOX1	transcript	XM_038540451.1	protein_coding	11	c.1058+3548C>T
chr6	34547222	G	A	PASS	A	intron_variant	MODIFIER	RBFOX1	RBFOX1	transcript	XM_038540440.1	protein_coding	17	c.1463+3548C>T
chr6	34547222	G	A	PASS	A	intron_variant	MODIFIER	RBFOX1	RBFOX1	transcript	XM_038540439.1	protein_coding	17	c.1466+3548C>T
chr6	34547222	G	A	PASS	A	intron_variant	MODIFIER	RBFOX1	RBFOX1	transcript	XM_038540446.1	protein_coding	16	c.1382+3548C>T
chr6	34547222	G	A	PASS	A	intron_variant	MODIFIER	RBFOX1	RBFOX1	transcript	XM_038540445.1	protein_coding	17	c.1466+3548C>T
chr6	34547222	G	A	PASS	A	intron_variant	MODIFIER	RBFOX1	RBFOX1	transcript	XM_038540450.1	protein_coding	11	c.1058+3548C>T
chr6	34547222	G	A	PASS	A	intron_variant	MODIFIER	RBFOX1	RBFOX1	transcript	XM_038540447.1	protein_coding	11	c.1115+3548C>T
chr6	34547222	G	A	PASS	A	intron_variant	MODIFIER	RBFOX1	RBFOX1	transcript	XM_038540449.1	protein_coding	12	c.1064+3548C>T
chr6	34547222	G	A	PASS	A	intron_variant	MODIFIER	RBFOX1	RBFOX1	transcript	XM_038540448.1	protein_coding	13	c.1106+3548C>T
chr6	34547222	G	A	PASS	A	intron_variant	MODIFIER	RBFOX1	RBFOX1	transcript	XM_038540437.1	protein_coding	17	c.1463+3548C>T
chr6	34547222	G	A	PASS	A	intron_variant	MODIFIER	RBFOX1	RBFOX1	transcript	XM_038540438.1	protein_coding	16	c.1424+3548C>T
chr6	34547222	G	A	PASS	A	intron_variant	MODIFIER	RBFOX1	RBFOX1	transcript	XM_038540441.1	protein_coding	16	c.1385+3548C>T
chr6	34547222	G	A	PASS	A	intron_variant	MODIFIER	RBFOX1	RBFOX1	transcript	XM_038540444.1	protein_coding	17	c.1463+3548C>T
chr6	34547222	G	A	PASS	A	intron_variant	MODIFIER	RBFOX1	RBFOX1	transcript	XM_038540443.1	protein_coding	17	c.1466+3548C>T
chr6	34556676	G	A	PASS	A	intron_variant	MODIFIER	RBFOX1	RBFOX1	transcript	XM_038540435.1	protein_coding	15	c.1359-1130C>T
chr6	34556676	G	A	PASS	A	intron_variant	MODIFIER	RBFOX1	RBFOX1	transcript	XM_038540451.1	protein_coding	9	c.951-1130C>T
chr6	34556676	G	A	PASS	A	intron_variant	MODIFIER	RBFOX1	RBFOX1	transcript	XM_038540440.1	protein_coding	16	c.1398+4626C>T
chr6	34556676	G	A	PASS	A	intron_variant	MODIFIER	RBFOX1	RBFOX1	transcript	XM_038540439.1	protein_coding	15	c.1359-1130C>T
chr6	34556676	G	A	PASS	A	intron_variant	MODIFIER	RBFOX1	RBFOX1	transcript	XM_038540446.1	protein_coding	15	c.1317+4626C>T
chr6	34556676	G	A	PASS	A	intron_variant	MODIFIER	RBFOX1	RBFOX1	transcript	XM_038540445.1	protein_coding	15	c.1359-1130C>T
chr6	34556676	G	A	PASS	A	intron_variant	MODIFIER	RBFOX1	RBFOX1	transcript	XM_038540450.1	protein_coding	9	c.951-1130C>T
chr6	34556676	G	A	PASS	A	intron_variant	MODIFIER	RBFOX1	RBFOX1	transcript	XM_038540447.1	protein_coding	9	c.1008-1130C>T
chr6	34556676	G	A	PASS	A	intron_variant	MODIFIER	RBFOX1	RBFOX1	transcript	XM_038540449.1	protein_coding	10	c.957-1130C>T
chr6	34556676	G	A	PASS	A	intron_variant	MODIFIER	RBFOX1	RBFOX1	transcript	XM_038540448.1	protein_coding	11	c.999-1130C>T
chr6	34556676	G	A	PASS	A	intron_variant	MODIFIER	RBFOX1	RBFOX1	transcript	XM_038540437.1	protein_coding	16	c.1398+4626C>T
chr6	34556676	G	A	PASS	A	intron_variant	MODIFIER	RBFOX1	RBFOX1	transcript	XM_038540438.1	protein_coding	14	c.1317-1130C>T
chr6	34556676	G	A	PASS	A	intron_variant	MODIFIER	RBFOX1	RBFOX1	transcript	XM_038540441.1	protein_coding	14	c.1278-1130C>T
chr6	34556676	G	A	PASS	A	intron_variant	MODIFIER	RBFOX1	RBFOX1	transcript	XM_038540444.1	protein_coding	16	c.1398+4626C>T
chr6	34556676	G	A	PASS	A	intron_variant	MODIFIER	RBFOX1	RBFOX1	transcript	XM_038540443.1	protein_coding	15	c.1359-1130C>T
chr6	34564278	G	A	PASS	A	intron_variant	MODIFIER	RBFOX1	RBFOX1	transcript	XM_038540435.1	protein_coding	15	c.1358+6023C>T
chr6	34564278	G	A	PASS	A	intron_variant	MODIFIER	RBFOX1	RBFOX1	transcript	XM_038540451.1	protein_coding	9	c.950+6023C>T
chr6	34564278	G	A	PASS	A	intron_variant	MODIFIER	RBFOX1	RBFOX1	transcript	XM_038540440.1	protein_coding	15	c.1359-2937C>T
chr6	34564278	G	A	PASS	A	intron_variant	MODIFIER	RBFOX1	RBFOX1	transcript	XM_038540439.1	protein_coding	15	c.1358+6023C>T
chr6	34564278	G	A	PASS	A	intron_variant	MODIFIER	RBFOX1	RBFOX1	transcript	XM_038540446.1	protein_coding	14	c.1278-2937C>T
chr6	34564278	G	A	PASS	A	intron_variant	MODIFIER	RBFOX1	RBFOX1	transcript	XM_038540445.1	protein_coding	15	c.1358+6023C>T
chr6	34564278	G	A	PASS	A	intron_variant	MODIFIER	RBFOX1	RBFOX1	transcript	XM_038540450.1	protein_coding	9	c.950+6023C>T
chr6	34564278	G	A	PASS	A	intron_variant	MODIFIER	RBFOX1	RBFOX1	transcript	XM_038540447.1	protein_coding	9	c.1007+6023C>T
chr6	34564278	G	A	PASS	A	intron_variant	MODIFIER	RBFOX1	RBFOX1	transcript	XM_038540449.1	protein_coding	10	c.956+6023C>T
chr6	34564278	G	A	PASS	A	intron_variant	MODIFIER	RBFOX1	RBFOX1	transcript	XM_038540448.1	protein_coding	11	c.998+6023C>T
chr6	34564278	G	A	PASS	A	intron_variant	MODIFIER	RBFOX1	RBFOX1	transcript	XM_038540437.1	protein_coding	15	c.1359-2937C>T
chr6	34564278	G	A	PASS	A	intron_variant	MODIFIER	RBFOX1	RBFOX1	transcript	XM_038540438.1	protein_coding	14	c.1316+6023C>T
chr6	34564278	G	A	PASS	A	intron_variant	MODIFIER	RBFOX1	RBFOX1	transcript	XM_038540441.1	protein_coding	14	c.1277+6023C>T
chr6	34564278	G	A	PASS	A	intron_variant	MODIFIER	RBFOX1	RBFOX1	transcript	XM_038540444.1	protein_coding	15	c.1359-2937C>T
chr6	34564278	G	A	PASS	A	intron_variant	MODIFIER	RBFOX1	RBFOX1	transcript	XM_038540443.1	protein_coding	15	c.1358+6023C>T
chr6	34597777	C	T	VQSRTrancheSNP99.90to100.00	T	intron_variant	MODIFIER	RBFOX1	RBFOX1	transcript	XM_038540435.1	protein_coding	13	c.1145-6329G>A
chr6	34597777	C	T	VQSRTrancheSNP99.90to100.00	T	intron_variant	MODIFIER	RBFOX1	RBFOX1	transcript	XM_038540451.1	protein_coding	7	c.737-6329G>A
chr6	34597777	C	T	VQSRTrancheSNP99.90to100.00	T	intron_variant	MODIFIER	RBFOX1	RBFOX1	transcript	XM_038540440.1	protein_coding	13	c.1145-6329G>A
chr6	34597777	C	T	VQSRTrancheSNP99.90to100.00	T	intron_variant	MODIFIER	RBFOX1	RBFOX1	transcript	XM_038540439.1	protein_coding	13	c.1145-6329G>A
chr6	34597777	C	T	VQSRTrancheSNP99.90to100.00	T	intron_variant	MODIFIER	RBFOX1	RBFOX1	transcript	XM_038540446.1	protein_coding	13	c.1144+15479G>A
chr6	34597777	C	T	VQSRTrancheSNP99.90to100.00	T	intron_variant	MODIFIER	RBFOX1	RBFOX1	transcript	XM_038540445.1	protein_coding	13	c.1145-6329G>A
chr6	34597777	C	T	VQSRTrancheSNP99.90to100.00	T	intron_variant	MODIFIER	RBFOX1	RBFOX1	transcript	XM_038540450.1	protein_coding	7	c.737-6329G>A
chr6	34597777	C	T	VQSRTrancheSNP99.90to100.00	T	intron_variant	MODIFIER	RBFOX1	RBFOX1	transcript	XM_038540447.1	protein_coding	7	c.794-6329G>A
chr6	34597777	C	T	VQSRTrancheSNP99.90to100.00	T	intron_variant	MODIFIER	RBFOX1	RBFOX1	transcript	XM_038540449.1	protein_coding	8	c.743-6329G>A
chr6	34597777	C	T	VQSRTrancheSNP99.90to100.00	T	intron_variant	MODIFIER	RBFOX1	RBFOX1	transcript	XM_038540448.1	protein_coding	9	c.785-6329G>A
chr6	34597777	C	T	VQSRTrancheSNP99.90to100.00	T	intron_variant	MODIFIER	RBFOX1	RBFOX1	transcript	XM_038540437.1	protein_coding	13	c.1145-6329G>A
chr6	34597777	C	T	VQSRTrancheSNP99.90to100.00	T	intron_variant	MODIFIER	RBFOX1	RBFOX1	transcript	XM_038540438.1	protein_coding	12	c.1103-6329G>A
chr6	34597777	C	T	VQSRTrancheSNP99.90to100.00	T	intron_variant	MODIFIER	RBFOX1	RBFOX1	transcript	XM_038540441.1	protein_coding	13	c.1144+15479G>A
chr6	34597777	C	T	VQSRTrancheSNP99.90to100.00	T	intron_variant	MODIFIER	RBFOX1	RBFOX1	transcript	XM_038540444.1	protein_coding	13	c.1145-6329G>A
chr6	34597777	C	T	VQSRTrancheSNP99.90to100.00	T	intron_variant	MODIFIER	RBFOX1	RBFOX1	transcript	XM_038540443.1	protein_coding	13	c.1145-6329G>A
chr6	34602187	C	T	PASS	T	intron_variant	MODIFIER	RBFOX1	RBFOX1	transcript	XM_038540435.1	protein_coding	13	c.1145-10739G>A
chr6	34602187	C	T	PASS	T	intron_variant	MODIFIER	RBFOX1	RBFOX1	transcript	XM_038540451.1	protein_coding	7	c.737-10739G>A
chr6	34602187	C	T	PASS	T	intron_variant	MODIFIER	RBFOX1	RBFOX1	transcript	XM_038540440.1	protein_coding	13	c.1145-10739G>A
chr6	34602187	C	T	PASS	T	intron_variant	MODIFIER	RBFOX1	RBFOX1	transcript	XM_038540439.1	protein_coding	13	c.1145-10739G>A
chr6	34602187	C	T	PASS	T	intron_variant	MODIFIER	RBFOX1	RBFOX1	transcript	XM_038540446.1	protein_coding	13	c.1144+11069G>A
chr6	34602187	C	T	PASS	T	intron_variant	MODIFIER	RBFOX1	RBFOX1	transcript	XM_038540445.1	protein_coding	13	c.1145-10739G>A
chr6	34602187	C	T	PASS	T	intron_variant	MODIFIER	RBFOX1	RBFOX1	transcript	XM_038540450.1	protein_coding	7	c.737-10739G>A
chr6	34602187	C	T	PASS	T	intron_variant	MODIFIER	RBFOX1	RBFOX1	transcript	XM_038540447.1	protein_coding	7	c.794-10739G>A
chr6	34602187	C	T	PASS	T	intron_variant	MODIFIER	RBFOX1	RBFOX1	transcript	XM_038540449.1	protein_coding	8	c.743-10739G>A
chr6	34602187	C	T	PASS	T	intron_variant	MODIFIER	RBFOX1	RBFOX1	transcript	XM_038540448.1	protein_coding	9	c.785-10739G>A
chr6	34602187	C	T	PASS	T	intron_variant	MODIFIER	RBFOX1	RBFOX1	transcript	XM_038540437.1	protein_coding	13	c.1145-10739G>A
chr6	34602187	C	T	PASS	T	intron_variant	MODIFIER	RBFOX1	RBFOX1	transcript	XM_038540438.1	protein_coding	12	c.1103-10739G>A
chr6	34602187	C	T	PASS	T	intron_variant	MODIFIER	RBFOX1	RBFOX1	transcript	XM_038540441.1	protein_coding	13	c.1144+11069G>A
chr6	34602187	C	T	PASS	T	intron_variant	MODIFIER	RBFOX1	RBFOX1	transcript	XM_038540444.1	protein_coding	13	c.1145-10739G>A
chr6	34602187	C	T	PASS	T	intron_variant	MODIFIER	RBFOX1	RBFOX1	transcript	XM_038540443.1	protein_coding	13	c.1145-10739G>A
chr6	34606949	GATCCAGAGCCAAATATTCGAACCTC	G	PASS	G	intron_variant	MODIFIER	RBFOX1	RBFOX1	transcript	XM_038540435.1	protein_coding	13	c.1144+6282_1144+6306delGAGGTTCGAATATTTGGCTCTGGAT
chr6	34606949	GATCCAGAGCCAAATATTCGAACCTC	G	PASS	G	intron_variant	MODIFIER	RBFOX1	RBFOX1	transcript	XM_038540451.1	protein_coding	7	c.736+6282_736+6306delGAGGTTCGAATATTTGGCTCTGGAT
chr6	34606949	GATCCAGAGCCAAATATTCGAACCTC	G	PASS	G	intron_variant	MODIFIER	RBFOX1	RBFOX1	transcript	XM_038540440.1	protein_coding	13	c.1144+6282_1144+6306delGAGGTTCGAATATTTGGCTCTGGAT
chr6	34606949	GATCCAGAGCCAAATATTCGAACCTC	G	PASS	G	intron_variant	MODIFIER	RBFOX1	RBFOX1	transcript	XM_038540439.1	protein_coding	13	c.1144+6282_1144+6306delGAGGTTCGAATATTTGGCTCTGGAT
chr6	34606949	GATCCAGAGCCAAATATTCGAACCTC	G	PASS	G	intron_variant	MODIFIER	RBFOX1	RBFOX1	transcript	XM_038540446.1	protein_coding	13	c.1144+6282_1144+6306delGAGGTTCGAATATTTGGCTCTGGAT
chr6	34606949	GATCCAGAGCCAAATATTCGAACCTC	G	PASS	G	intron_variant	MODIFIER	RBFOX1	RBFOX1	transcript	XM_038540445.1	protein_coding	13	c.1144+6282_1144+6306delGAGGTTCGAATATTTGGCTCTGGAT
chr6	34606949	GATCCAGAGCCAAATATTCGAACCTC	G	PASS	G	intron_variant	MODIFIER	RBFOX1	RBFOX1	transcript	XM_038540450.1	protein_coding	7	c.736+6282_736+6306delGAGGTTCGAATATTTGGCTCTGGAT
chr6	34606949	GATCCAGAGCCAAATATTCGAACCTC	G	PASS	G	intron_variant	MODIFIER	RBFOX1	RBFOX1	transcript	XM_038540447.1	protein_coding	7	c.793+6282_793+6306delGAGGTTCGAATATTTGGCTCTGGAT
chr6	34606949	GATCCAGAGCCAAATATTCGAACCTC	G	PASS	G	intron_variant	MODIFIER	RBFOX1	RBFOX1	transcript	XM_038540449.1	protein_coding	8	c.742+6282_742+6306delGAGGTTCGAATATTTGGCTCTGGAT
chr6	34606949	GATCCAGAGCCAAATATTCGAACCTC	G	PASS	G	intron_variant	MODIFIER	RBFOX1	RBFOX1	transcript	XM_038540448.1	protein_coding	9	c.784+6282_784+6306delGAGGTTCGAATATTTGGCTCTGGAT
chr6	34606949	GATCCAGAGCCAAATATTCGAACCTC	G	PASS	G	intron_variant	MODIFIER	RBFOX1	RBFOX1	transcript	XM_038540437.1	protein_coding	13	c.1144+6282_1144+6306delGAGGTTCGAATATTTGGCTCTGGAT
chr6	34606949	GATCCAGAGCCAAATATTCGAACCTC	G	PASS	G	intron_variant	MODIFIER	RBFOX1	RBFOX1	transcript	XM_038540438.1	protein_coding	12	c.1102+6282_1102+6306delGAGGTTCGAATATTTGGCTCTGGAT
chr6	34606949	GATCCAGAGCCAAATATTCGAACCTC	G	PASS	G	intron_variant	MODIFIER	RBFOX1	RBFOX1	transcript	XM_038540441.1	protein_coding	13	c.1144+6282_1144+6306delGAGGTTCGAATATTTGGCTCTGGAT
chr6	34606949	GATCCAGAGCCAAATATTCGAACCTC	G	PASS	G	intron_variant	MODIFIER	RBFOX1	RBFOX1	transcript	XM_038540444.1	protein_coding	13	c.1144+6282_1144+6306delGAGGTTCGAATATTTGGCTCTGGAT
chr6	34606949	GATCCAGAGCCAAATATTCGAACCTC	G	PASS	G	intron_variant	MODIFIER	RBFOX1	RBFOX1	transcript	XM_038540443.1	protein_coding	13	c.1144+6282_1144+6306delGAGGTTCGAATATTTGGCTCTGGAT
chr6	34634996	C	T	PASS	T	intron_variant	MODIFIER	RBFOX1	RBFOX1	transcript	XM_038540435.1	protein_coding	9	c.883-2676G>A
chr6	34634996	C	T	PASS	T	intron_variant	MODIFIER	RBFOX1	RBFOX1	transcript	XM_038540451.1	protein_coding	3	c.475-2676G>A
chr6	34634996	C	T	PASS	T	intron_variant	MODIFIER	RBFOX1	RBFOX1	transcript	XM_038540440.1	protein_coding	9	c.883-2676G>A
chr6	34634996	C	T	PASS	T	intron_variant	MODIFIER	RBFOX1	RBFOX1	transcript	XM_038540439.1	protein_coding	9	c.883-2676G>A
chr6	34634996	C	T	PASS	T	intron_variant	MODIFIER	RBFOX1	RBFOX1	transcript	XM_038540446.1	protein_coding	9	c.883-2676G>A
chr6	34634996	C	T	PASS	T	intron_variant	MODIFIER	RBFOX1	RBFOX1	transcript	XM_038540445.1	protein_coding	9	c.883-2676G>A
chr6	34634996	C	T	PASS	T	intron_variant	MODIFIER	RBFOX1	RBFOX1	transcript	XM_038540450.1	protein_coding	3	c.475-2676G>A
chr6	34634996	C	T	PASS	T	intron_variant	MODIFIER	RBFOX1	RBFOX1	transcript	XM_038540447.1	protein_coding	3	c.532-2676G>A
chr6	34634996	C	T	PASS	T	intron_variant	MODIFIER	RBFOX1	RBFOX1	transcript	XM_038540449.1	protein_coding	4	c.481-2676G>A
chr6	34634996	C	T	PASS	T	intron_variant	MODIFIER	RBFOX1	RBFOX1	transcript	XM_038540448.1	protein_coding	5	c.523-2676G>A
chr6	34634996	C	T	PASS	T	intron_variant	MODIFIER	RBFOX1	RBFOX1	transcript	XM_038540437.1	protein_coding	9	c.883-2676G>A
chr6	34634996	C	T	PASS	T	intron_variant	MODIFIER	RBFOX1	RBFOX1	transcript	XM_038540438.1	protein_coding	8	c.841-2676G>A
chr6	34634996	C	T	PASS	T	intron_variant	MODIFIER	RBFOX1	RBFOX1	transcript	XM_038540441.1	protein_coding	9	c.883-2676G>A
chr6	34634996	C	T	PASS	T	intron_variant	MODIFIER	RBFOX1	RBFOX1	transcript	XM_038540444.1	protein_coding	9	c.883-2676G>A
chr6	34634996	C	T	PASS	T	intron_variant	MODIFIER	RBFOX1	RBFOX1	transcript	XM_038540443.1	protein_coding	9	c.883-2676G>A
chr6	34750470	C	T	PASS	T	intron_variant	MODIFIER	RBFOX1	RBFOX1	transcript	XM_038540435.1	protein_coding	7	c.496-61310G>A
chr6	34750470	C	T	PASS	T	intron_variant	MODIFIER	RBFOX1	RBFOX1	transcript	XM_038540451.1	protein_coding	1	c.88-61310G>A
chr6	34750470	C	T	PASS	T	intron_variant	MODIFIER	RBFOX1	RBFOX1	transcript	XM_038540440.1	protein_coding	7	c.496-61310G>A
chr6	34750470	C	T	PASS	T	intron_variant	MODIFIER	RBFOX1	RBFOX1	transcript	XM_038540439.1	protein_coding	7	c.496-61310G>A
chr6	34750470	C	T	PASS	T	intron_variant	MODIFIER	RBFOX1	RBFOX1	transcript	XM_038540446.1	protein_coding	7	c.496-61310G>A
chr6	34750470	C	T	PASS	T	intron_variant	MODIFIER	RBFOX1	RBFOX1	transcript	XM_038540445.1	protein_coding	7	c.496-61310G>A
chr6	34750470	C	T	PASS	T	intron_variant	MODIFIER	RBFOX1	RBFOX1	transcript	XM_038540450.1	protein_coding	1	c.88-61310G>A
chr6	34750470	C	T	PASS	T	intron_variant	MODIFIER	RBFOX1	RBFOX1	transcript	XM_038540447.1	protein_coding	1	c.145-61310G>A
chr6	34750470	C	T	PASS	T	intron_variant	MODIFIER	RBFOX1	RBFOX1	transcript	XM_038540449.1	protein_coding	2	c.94-61310G>A
chr6	34750470	C	T	PASS	T	intron_variant	MODIFIER	RBFOX1	RBFOX1	transcript	XM_038540448.1	protein_coding	3	c.136-61310G>A
chr6	34750470	C	T	PASS	T	intron_variant	MODIFIER	RBFOX1	RBFOX1	transcript	XM_038540437.1	protein_coding	7	c.496-61310G>A
chr6	34750470	C	T	PASS	T	intron_variant	MODIFIER	RBFOX1	RBFOX1	transcript	XM_038540438.1	protein_coding	6	c.454-61310G>A
chr6	34750470	C	T	PASS	T	intron_variant	MODIFIER	RBFOX1	RBFOX1	transcript	XM_038540441.1	protein_coding	7	c.496-61310G>A
chr6	34750470	C	T	PASS	T	intron_variant	MODIFIER	RBFOX1	RBFOX1	transcript	XM_038540444.1	protein_coding	7	c.496-61310G>A
chr6	34750470	C	T	PASS	T	intron_variant	MODIFIER	RBFOX1	RBFOX1	transcript	XM_038540443.1	protein_coding	7	c.496-61310G>A
chr6	38265592	G	T	PASS	T	3_prime_UTR_variant	MODIFIER	ZSCAN32_2	ZSCAN32_2	transcript	XM_038540607.1	protein_coding	3	c.*879G>T
chr6	38265592	G	T	PASS	T	3_prime_UTR_variant	MODIFIER	ZSCAN32_2	ZSCAN32_2	transcript	XM_038540608.1	protein_coding	4	c.*879G>T
chr6	38265592	G	T	PASS	T	3_prime_UTR_variant	MODIFIER	ZSCAN32_2	ZSCAN32_2	transcript	XM_038540612.1	protein_coding	4	c.*879G>T
chr6	38265592	G	T	PASS	T	3_prime_UTR_variant	MODIFIER	ZSCAN32_2	ZSCAN32_2	transcript	XM_038540615.1	protein_coding	4	c.*879G>T
chr6	38265592	G	T	PASS	T	3_prime_UTR_variant	MODIFIER	ZSCAN32_2	ZSCAN32_2	transcript	XM_038540609.1	protein_coding	4	c.*879G>T
chr6	38265592	G	T	PASS	T	3_prime_UTR_variant	MODIFIER	ZSCAN32_2	ZSCAN32_2	transcript	XM_038540610.1	protein_coding	4	c.*879G>T
chr6	38265592	G	T	PASS	T	3_prime_UTR_variant	MODIFIER	ZSCAN32_2	ZSCAN32_2	transcript	XM_038540611.1	protein_coding	4	c.*879G>T
chr6	38265592	G	T	PASS	T	3_prime_UTR_variant	MODIFIER	ZSCAN32_2	ZSCAN32_2	transcript	XM_038540613.1	protein_coding	4	c.*879G>T
chr6	38265592	G	T	PASS	T	3_prime_UTR_variant	MODIFIER	ZSCAN32_2	ZSCAN32_2	transcript	XM_038540614.1	protein_coding	4	c.*879G>T
chr6	38265592	G	T	PASS	T	upstream_gene_variant	MODIFIER	LOC119876369	LOC119876369	transcript	XR_005360945.1	pseudogene	-1	n.-1888G>T
chr6	38265592	G	T	PASS	T	upstream_gene_variant	MODIFIER	LOC119876369	LOC119876369	transcript	XR_005360946.1	pseudogene	-1	n.-1893G>T
chr6	38265592	G	T	PASS	T	non_coding_transcript_exon_variant	MODIFIER	ZSCAN32_2	ZSCAN32_2	transcript	XR_005360939.1	pseudogene	2	n.5932G>T
chr6	38265592	G	T	PASS	T	non_coding_transcript_exon_variant	MODIFIER	ZSCAN32_2	ZSCAN32_2	transcript	XR_005360940.1	pseudogene	2	n.1846G>T
chr6	38265592	G	T	PASS	T	non_coding_transcript_exon_variant	MODIFIER	ZSCAN32_2	ZSCAN32_2	transcript	XR_005360941.1	pseudogene	2	n.1824G>T
chr6	38598275	C	T	PASS	T	upstream_gene_variant	MODIFIER	BICDL2	BICDL2	transcript	XM_038540629.1	protein_coding	-1	c.-741C>T
chr6	38598275	C	T	PASS	T	downstream_gene_variant	MODIFIER	LOC119872340	LOC119872340	transcript	XR_005360384.1	pseudogene	-1	n.*23C>T
chr6	38598275	C	T	PASS	T	downstream_gene_variant	MODIFIER	LOC119872340	LOC119872340	transcript	XR_005360385.1	pseudogene	-1	n.*23C>T
chr6	38598275	C	T	PASS	T	intergenic_region	MODIFIER	LOC119872340-BICDL2	LOC119872340-BICDL2	intergenic_region	LOC119872340_3-BICDL2_3		-1	n.38598275C>T
chr6	43205577	G	C	PASS	C	intron_variant	MODIFIER	WDR47	WDR47	transcript	XM_038541108.1	protein_coding	2	c.-51+3902G>C
chr6	43205577	G	C	PASS	C	intron_variant	MODIFIER	WDR47	WDR47	transcript	XM_038541109.1	protein_coding	3	c.-51+2846G>C
chr6	43205577	G	C	PASS	C	intron_variant	MODIFIER	WDR47	WDR47	transcript	XM_038541110.1	protein_coding	2	c.-120+3902G>C
chr6	43205577	G	C	PASS	C	intron_variant	MODIFIER	WDR47	WDR47	transcript	XM_038541111.1	protein_coding	1	c.-50-6245G>C
chr6	44272805	C	T	PASS	T	intron_variant	MODIFIER	VAV3	VAV3	transcript	XM_038541164.1	protein_coding	15	c.1503-10571C>T
chr6	44272805	C	T	PASS	T	intron_variant	MODIFIER	VAV3	VAV3	transcript	XM_038541166.1	protein_coding	15	c.1503-10571C>T
chr6	44272805	C	T	PASS	T	intron_variant	MODIFIER	VAV3	VAV3	transcript	XM_038541165.1	protein_coding	15	c.1503-10571C>T
chr6	44272805	C	T	PASS	T	intron_variant	MODIFIER	VAV3	VAV3	transcript	XM_038541167.1	protein_coding	15	c.1344-10571C>T
chr6	45980057	G	A	PASS	A	intergenic_region	MODIFIER	LOC106558908-LOC111096363	LOC106558908-LOC111096363	intergenic_region	LOC106558908_3-LOC111096363_3		-1	n.45980057G>A
chr6	48620667	G	GAAAA	PASS	GAAAA	intergenic_region	MODIFIER	LOC119876381-OLFM3	LOC119876381-OLFM3	intergenic_region	LOC119876381-OLFM3_3		-1	n.48620667_48620668insAAAA
chr6	55088984	C	A	PASS	A	intergenic_region	MODIFIER	LOC100685030-LOC111096517	LOC100685030-LOC111096517	intergenic_region	LOC100685030_3-LOC111096517_3		-1	n.55088984C>A
chr6	55327131	G	A	PASS	A	downstream_gene_variant	MODIFIER	LOC119863946	LOC119863946	transcript	XR_005360425.1	pseudogene	-1	n.*1483G>A
chr6	55327131	G	A	PASS	A	intragenic_variant	MODIFIER	LOC111096479	LOC111096479	gene_variant	LOC111096479_3		-1	n.55327131G>A
chr6	58052784	A	T	PASS	T	downstream_gene_variant	MODIFIER	HFM1	HFM1	transcript	XR_005361261.1	pseudogene	-1	n.*2697A>T
chr6	58052784	A	T	PASS	T	intragenic_variant	MODIFIER	LOC100683562	LOC100683562	gene_variant	LOC100683562_3		-1	n.58052784A>T
chr6	59251376	T	G	PASS	G	intron_variant	MODIFIER	LOC119876388	LOC119876388	transcript	XM_038541432.1	protein_coding	3	c.-2-37315A>C
chr6	59251376	T	G	PASS	G	intron_variant	MODIFIER	LOC119876388	LOC119876388	transcript	XM_038541435.1	protein_coding	1	c.-2-37315A>C
chr6	59251376	T	G	PASS	G	intron_variant	MODIFIER	LOC119876388	LOC119876388	transcript	XM_038541436.1	protein_coding	2	c.-2-37315A>C
chr6	59251376	T	G	PASS	G	intron_variant	MODIFIER	LOC119876388	LOC119876388	transcript	XM_038541433.1	protein_coding	3	c.-2-37315A>C
chr6	59251376	T	G	PASS	G	intron_variant	MODIFIER	LOC119876388	LOC119876388	transcript	XM_038541434.1	protein_coding	2	c.-2-37315A>C
chr6	59251376	T	G	PASS	G	intron_variant	MODIFIER	LOC119876388	LOC119876388	transcript	XM_038541437.1	protein_coding	2	c.-2-37315A>C
chr6	59251376	T	G	PASS	G	intron_variant	MODIFIER	LOC119876388	LOC119876388	transcript	XM_038541438.1	protein_coding	2	c.-2-37315A>C
chr6	59975222	G	A	PASS	A	intron_variant	MODIFIER	KYAT3	KYAT3	transcript	XM_038541451.1	protein_coding	9	c.864+268G>A
chr6	59975222	G	A	PASS	A	intron_variant	MODIFIER	KYAT3	KYAT3	transcript	XM_038541452.1	protein_coding	9	c.864+268G>A
chr6	59975222	G	A	PASS	A	intron_variant	MODIFIER	KYAT3	KYAT3	transcript	XM_038541453.1	protein_coding	10	c.864+268G>A
chr6	59975222	G	A	PASS	A	intron_variant	MODIFIER	KYAT3	KYAT3	transcript	XM_038541454.1	protein_coding	9	c.762+268G>A
chr6	59975222	G	A	PASS	A	intron_variant	MODIFIER	KYAT3	KYAT3	transcript	XM_038541455.1	protein_coding	8	c.762+268G>A
chr6	65895692	A	AAATATATATTTATATATTATTTAAATATTTAATATTTAAATATTTAAATATTATTTAAATATTTAATATTTAATTTAATATTTAATTTAAATATTTATTTATATATATTTAATATAT	PASS	AAATATATATTTATATATTATTTAAATATTTAATATTTAAATATTTAAATATTATTTAAATATTTAATATTTAATTTAATATTTAATTTAAATATTTATTTATATATATTTAATATAT	intron_variant	MODIFIER	LOC111096433	LOC111096433	transcript	XR_005361362.1	pseudogene	3	n.422+499_422+500insATATATTAAATATATATAAATAAATATTTAAATTAAATATTAAATTAAATATTAAATATTTAAATAATATTTAAATATTTAAATATTAAATATTTAAATAATATATAAATATATATT
chr6	65895692	A	AAATATATATTTATATATTATTTAAATATTTAATATTTAAATATTTAAATATTATTTAAATATTTAATATTTAATTTAATATTTAATTTAAATATTTATTTATATATATTTAATATAT	PASS	AAATATATATTTATATATTATTTAAATATTTAATATTTAAATATTTAAATATTATTTAAATATTTAATATTTAATTTAATATTTAATTTAAATATTTATTTATATATATTTAATATAT	intron_variant	MODIFIER	LOC111096433	LOC111096433	transcript	XR_005361364.1	pseudogene	3	n.422+499_422+500insATATATTAAATATATATAAATAAATATTTAAATTAAATATTAAATTAAATATTAAATATTTAAATAATATTTAAATATTTAAATATTAAATATTTAAATAATATATAAATATATATT
chr6	65895692	A	AAATATATATTTATATATTATTTAAATATTTAATATTTAAATATTTAAATATTATTTAAATATTTAATATTTAATTTAATATTTAATTTAAATATTTATTTATATATATTTAATATAT	PASS	AAATATATATTTATATATTATTTAAATATTTAATATTTAAATATTTAAATATTATTTAAATATTTAATATTTAATTTAATATTTAATTTAAATATTTATTTATATATATTTAATATAT	intron_variant	MODIFIER	LOC111096433	LOC111096433	transcript	XR_005361367.1	pseudogene	4	n.541+499_541+500insATATATTAAATATATATAAATAAATATTTAAATTAAATATTAAATTAAATATTAAATATTTAAATAATATTTAAATATTTAAATATTAAATATTTAAATAATATATAAATATATATT
chr6	65895692	A	AAATATATATTTATATATTATTTAAATATTTAATATTTAAATATTTAAATATTATTTAAATATTTAATATTTAATTTAATATTTAATTTAAATATTTATTTATATATATTTAATATAT	PASS	AAATATATATTTATATATTATTTAAATATTTAATATTTAAATATTTAAATATTATTTAAATATTTAATATTTAATTTAATATTTAATTTAAATATTTATTTATATATATTTAATATAT	intron_variant	MODIFIER	LOC111096433	LOC111096433	transcript	XR_005361363.1	pseudogene	4	n.498+499_498+500insATATATTAAATATATATAAATAAATATTTAAATTAAATATTAAATTAAATATTAAATATTTAAATAATATTTAAATATTTAAATATTAAATATTTAAATAATATATAAATATATATT
chr6	65895692	A	AAATATATATTTATATATTATTTAAATATTTAATATTTAAATATTTAAATATTATTTAAATATTTAATATTTAATTTAATATTTAATTTAAATATTTATTTATATATATTTAATATAT	PASS	AAATATATATTTATATATTATTTAAATATTTAATATTTAAATATTTAAATATTATTTAAATATTTAATATTTAATTTAATATTTAATTTAAATATTTATTTATATATATTTAATATAT	intron_variant	MODIFIER	LOC111096433	LOC111096433	transcript	XR_005361368.1	pseudogene	4	n.603+499_603+500insATATATTAAATATATATAAATAAATATTTAAATTAAATATTAAATTAAATATTAAATATTTAAATAATATTTAAATATTTAAATATTAAATATTTAAATAATATATAAATATATATT
chr6	65895692	A	AAATATATATTTATATATTATTTAAATATTTAATATTTAAATATTTAAATATTATTTAAATATTTAATATTTAATTTAATATTTAATTTAAATATTTATTTATATATATTTAATATAT	PASS	AAATATATATTTATATATTATTTAAATATTTAATATTTAAATATTTAAATATTATTTAAATATTTAATATTTAATTTAATATTTAATTTAAATATTTATTTATATATATTTAATATAT	intron_variant	MODIFIER	LOC111096433	LOC111096433	transcript	XR_005361366.1	pseudogene	4	n.551+499_551+500insATATATTAAATATATATAAATAAATATTTAAATTAAATATTAAATTAAATATTAAATATTTAAATAATATTTAAATATTTAAATATTAAATATTTAAATAATATATAAATATATATT
chr6	65895692	A	AAATATATATTTATATATTATTTAAATATTTAATATTTAAATATTTAAATATTATTTAAATATTTAATATTTAATTTAATATTTAATTTAAATATTTATTTATATATATTTAATATAT	PASS	AAATATATATTTATATATTATTTAAATATTTAATATTTAAATATTTAAATATTATTTAAATATTTAATATTTAATTTAATATTTAATTTAAATATTTATTTATATATATTTAATATAT	intron_variant	MODIFIER	LOC111096433	LOC111096433	transcript	XR_005361372.1	pseudogene	3	n.431+499_431+500insATATATTAAATATATATAAATAAATATTTAAATTAAATATTAAATTAAATATTAAATATTTAAATAATATTTAAATATTTAAATATTAAATATTTAAATAATATATAAATATATATT
chr6	65895692	A	AAATATATATTTATATATTATTTAAATATTTAATATTTAAATATTTAAATATTATTTAAATATTTAATATTTAATTTAATATTTAATTTAAATATTTATTTATATATATTTAATATAT	PASS	AAATATATATTTATATATTATTTAAATATTTAATATTTAAATATTTAAATATTATTTAAATATTTAATATTTAATTTAATATTTAATTTAAATATTTATTTATATATATTTAATATAT	intron_variant	MODIFIER	LOC111096433	LOC111096433	transcript	XR_005361369.1	pseudogene	3	n.485+499_485+500insATATATTAAATATATATAAATAAATATTTAAATTAAATATTAAATTAAATATTAAATATTTAAATAATATTTAAATATTTAAATATTAAATATTTAAATAATATATAAATATATATT
chr6	65895692	A	AAATATATATTTATATATTATTTAAATATTTAATATTTAAATATTTAAATATTATTTAAATATTTAATATTTAATTTAATATTTAATTTAAATATTTATTTATATATATTTAATATAT	PASS	AAATATATATTTATATATTATTTAAATATTTAATATTTAAATATTTAAATATTATTTAAATATTTAATATTTAATTTAATATTTAATTTAAATATTTATTTATATATATTTAATATAT	intron_variant	MODIFIER	LOC111096433	LOC111096433	transcript	XR_005361371.1	pseudogene	3	n.415+499_415+500insATATATTAAATATATATAAATAAATATTTAAATTAAATATTAAATTAAATATTAAATATTTAAATAATATTTAAATATTTAAATATTAAATATTTAAATAATATATAAATATATATT
chr6	65895692	A	AAATATATATTTATATATTATTTAAATATTTAATATTTAAATATTTAAATATTATTTAAATATTTAATATTTAATTTAATATTTAATTTAAATATTTATTTATATATATTTAATATAT	PASS	AAATATATATTTATATATTATTTAAATATTTAATATTTAAATATTTAAATATTATTTAAATATTTAATATTTAATTTAATATTTAATTTAAATATTTATTTATATATATTTAATATAT	intron_variant	MODIFIER	LOC111096433	LOC111096433	transcript	XR_005361361.1	pseudogene	3	n.422+499_422+500insATATATTAAATATATATAAATAAATATTTAAATTAAATATTAAATTAAATATTAAATATTTAAATAATATTTAAATATTTAAATATTAAATATTTAAATAATATATAAATATATATT
chr6	65895692	A	AAATATATATTTATATATTATTTAAATATTTAATATTTAAATATTTAAATATTATTTAAATATTTAATATTTAATTTAATATTTAATTTAAATATTTATTTATATATATTTAATATAT	PASS	AAATATATATTTATATATTATTTAAATATTTAATATTTAAATATTTAAATATTATTTAAATATTTAATATTTAATTTAATATTTAATTTAAATATTTATTTATATATATTTAATATAT	intron_variant	MODIFIER	LOC111096433	LOC111096433	transcript	XR_005361370.1	pseudogene	3	n.421+499_421+500insATATATTAAATATATATAAATAAATATTTAAATTAAATATTAAATTAAATATTAAATATTTAAATAATATTTAAATATTTAAATATTAAATATTTAAATAATATATAAATATATATT
chr6	65895692	A	AAATATATATTTATATATTATTTAAATATTTAATATTTAAATATTTAAATATTATTTAAATATTTAATATTTAATTTAATATTTAATTTAAATATTTATTTATATATATTTAATATAT	PASS	AAATATATATTTATATATTATTTAAATATTTAATATTTAAATATTTAAATATTATTTAAATATTTAATATTTAATTTAATATTTAATTTAAATATTTATTTATATATATTTAATATAT	intron_variant	MODIFIER	LOC111096433	LOC111096433	transcript	XR_005361365.1	pseudogene	3	n.422+499_422+500insATATATTAAATATATATAAATAAATATTTAAATTAAATATTAAATTAAATATTAAATATTTAAATAATATTTAAATATTTAAATATTAAATATTTAAATAATATATAAATATATATT
chr6	68096540	A	G	PASS	G	intergenic_region	MODIFIER	LOC119872431-LOC111096530	LOC119872431-LOC111096530	intergenic_region	LOC119872431_3-LOC111096530_3		-1	n.68096540A>G
chr7	969989	G	A	PASS	A	splice_region_variant&intron_variant	LOW	LOC607201	LOC607201	transcript	XM_038541734.1	protein_coding	21	c.3439-6C>T
chr7	969989	G	A	PASS	A	upstream_gene_variant	MODIFIER	LGR6	LGR6	transcript	XM_038541878.1	protein_coding	-1	c.-4287C>T
chr7	1901710	C	A	PASS	A	intron_variant	MODIFIER	CACNA1S	CACNA1S	transcript	XM_038541920.1	protein_coding	11	c.1620-306C>A
chr7	1901710	C	A	PASS	A	intron_variant	MODIFIER	CACNA1S	CACNA1S	transcript	XM_038541921.1	protein_coding	11	c.1620-306C>A
chr7	4490804	G	A	PASS	A	intron_variant	MODIFIER	LOC119872482	LOC119872482	transcript	XR_005361830.1	pseudogene	3	n.989-6305G>A
chr7	4490804	G	A	PASS	A	intron_variant	MODIFIER	LOC119872482	LOC119872482	transcript	XR_005361831.1	pseudogene	2	n.830-6305G>A
chr7	4490804	G	A	PASS	A	intron_variant	MODIFIER	LOC119872482	LOC119872482	transcript	XR_005361829.1	pseudogene	2	n.825-6305G>A
chr7	5769717	C	T	PASS	T	intron_variant	MODIFIER	IL19	IL19	transcript	XM_038541758.1	protein_coding	4	c.438+177C>T
chr7	5989720	G	T	PASS	T	intron_variant	MODIFIER	C4BPB	C4BPB	transcript	XM_038542009.1	protein_coding	1	c.58+157G>T
chr7	6129001	C	A	PASS	A	upstream_gene_variant	MODIFIER	LOC119872782	LOC119872782	transcript	XR_005362798.1	snRNA	-1	n.-2779C>A
chr7	6129001	C	A	PASS	A	intron_variant	MODIFIER	CD55	CD55	transcript	XM_038542012.1	protein_coding	3	c.470-196C>A
chr7	6129001	C	A	PASS	A	intron_variant	MODIFIER	CD55	CD55	transcript	XM_038542014.1	protein_coding	3	c.470-196C>A
chr7	6129001	C	A	PASS	A	intron_variant	MODIFIER	CD55	CD55	transcript	XM_038542013.1	protein_coding	3	c.470-196C>A
chr7	6129001	C	A	PASS	A	intron_variant	MODIFIER	CD55	CD55	transcript	XM_038542015.1	protein_coding	3	c.470-196C>A
chr7	6129001	C	A	PASS	A	intron_variant	MODIFIER	CD55	CD55	transcript	XM_038542016.1	protein_coding	3	c.470-196C>A
chr7	6129001	C	A	PASS	A	intron_variant	MODIFIER	CD55	CD55	transcript	XM_038542017.1	protein_coding	3	c.470-196C>A
chr7	6129001	C	A	PASS	A	intron_variant	MODIFIER	CD55	CD55	transcript	XM_038542018.1	protein_coding	3	c.470-196C>A
chr7	6129001	C	A	PASS	A	intron_variant	MODIFIER	CD55	CD55	transcript	XM_038542019.1	protein_coding	3	c.470-196C>A
chr7	6129001	C	A	PASS	A	intron_variant	MODIFIER	CD55	CD55	transcript	XR_005361851.1	pseudogene	3	n.541-196C>A
chr7	6129001	C	A	PASS	A	intron_variant	MODIFIER	CD55	CD55	transcript	XR_005361852.1	pseudogene	3	n.541-196C>A
chr7	6129001	C	A	PASS	A	intron_variant	MODIFIER	CD55	CD55	transcript	XR_005361853.1	pseudogene	3	n.541-196C>A
chr7	6858508	T	G	PASS	G	intergenic_region	MODIFIER	PLXNA2-LOC106559014	PLXNA2-LOC106559014	intergenic_region	PLXNA2_3-LOC106559014_3		-1	n.6858508T>G
chr7	8005426	TA	T	PASS	T	intron_variant	MODIFIER	LOC111096613	LOC111096613	transcript	XR_005361583.1	pseudogene	1	n.138+3089delT
chr7	8005426	TA	T	PASS	T	intron_variant	MODIFIER	LOC111096613	LOC111096613	transcript	XR_005361584.1	pseudogene	1	n.138+3089delT
chr7	8160821	A	ATCAGCTCAACTTTTATTTTTTTTTTTTTTTTTTTTTTTTTTTTTTTTTTTTTTTTTTTTTTTTTTT	PASS	ATCAGCTCAACTTTTATTTTTTTTTTTTTTTTTTTTTTTTTTTTTTTTTTTTTTTTTTTTTTTTTTT	intron_variant	MODIFIER	LAMB3	LAMB3	transcript	XM_038542035.1	protein_coding	1	c.-980+26708_-980+26709insAAAAAAAAAAAAAAAAAAAAAAAAAAAAAAAAAAAAAAAAAAAAAAAAAAATAAAAGTTGAGCTGA
chr7	8994685	C	T	PASS	T	intron_variant	MODIFIER	HHAT	HHAT	transcript	XM_038542057.1	protein_coding	9	c.1043+24316C>T
chr7	8994685	C	T	PASS	T	intron_variant	MODIFIER	HHAT	HHAT	transcript	XR_005361891.1	pseudogene	9	n.1237-14605C>T
chr7	8994685	C	T	PASS	T	intron_variant	MODIFIER	HHAT	HHAT	transcript	XM_038542060.1	protein_coding	9	c.1043+24316C>T
chr7	8994685	C	T	PASS	T	intron_variant	MODIFIER	HHAT	HHAT	transcript	XM_038542059.1	protein_coding	9	c.1043+24316C>T
chr7	8994685	C	T	PASS	T	intron_variant	MODIFIER	HHAT	HHAT	transcript	XM_038542063.1	protein_coding	7	c.632+24316C>T
chr7	8994685	C	T	PASS	T	intron_variant	MODIFIER	HHAT	HHAT	transcript	XR_005361890.1	pseudogene	9	n.1237-14605C>T
chr7	8994685	C	T	PASS	T	intron_variant	MODIFIER	HHAT	HHAT	transcript	XM_038542058.1	protein_coding	9	c.1043+24316C>T
chr7	8994685	C	T	PASS	T	intron_variant	MODIFIER	HHAT	HHAT	transcript	XM_038542061.1	protein_coding	7	c.632+24316C>T
chr7	9098388	G	A	PASS	A	intron_variant	MODIFIER	HHAT	HHAT	transcript	XM_038542057.1	protein_coding	11	c.1391-30003G>A
chr7	9098388	G	A	PASS	A	intron_variant	MODIFIER	HHAT	HHAT	transcript	XM_038542059.1	protein_coding	11	c.1391-8756G>A
chr7	9098388	G	A	PASS	A	intron_variant	MODIFIER	HHAT	HHAT	transcript	XM_038542063.1	protein_coding	9	c.980-8756G>A
chr7	9098388	G	A	PASS	A	intron_variant	MODIFIER	HHAT	HHAT	transcript	XR_005361890.1	pseudogene	12	n.1642-8756G>A
chr7	9098388	G	A	PASS	A	intron_variant	MODIFIER	HHAT	HHAT	transcript	XM_038542058.1	protein_coding	11	c.1388-30003G>A
chr7	9098388	G	A	PASS	A	intron_variant	MODIFIER	HHAT	HHAT	transcript	XM_038542061.1	protein_coding	9	c.980-30003G>A
chr7	9143865	TC	T	PASS	T	downstream_gene_variant	MODIFIER	HHAT	HHAT	transcript	XM_038542057.1	protein_coding	-1	c.*5333delC
chr7	9143865	TC	T	PASS	T	downstream_gene_variant	MODIFIER	HHAT	HHAT	transcript	XM_038542058.1	protein_coding	-1	c.*5333delC
chr7	9143865	TC	T	PASS	T	downstream_gene_variant	MODIFIER	HHAT	HHAT	transcript	XM_038542061.1	protein_coding	-1	c.*5333delC
chr7	9143865	TC	T	PASS	T	intron_variant	MODIFIER	KCNH1	KCNH1	transcript	XM_038542056.1	protein_coding	10	c.2032-27114delG
chr7	9226359	C	T	PASS	T	intron_variant	MODIFIER	KCNH1	KCNH1	transcript	XM_038542056.1	protein_coding	7	c.1382-3058G>A
chr7	9355812	G	A	PASS	A	intron_variant	MODIFIER	KCNH1	KCNH1	transcript	XM_038542056.1	protein_coding	6	c.952-23461C>T
chr7	9367652	C	T	PASS	T	intron_variant	MODIFIER	KCNH1	KCNH1	transcript	XM_038542056.1	protein_coding	6	c.951+29507G>A
chr7	9373949	A	C	PASS	C	intron_variant	MODIFIER	KCNH1	KCNH1	transcript	XM_038542056.1	protein_coding	6	c.951+23210T>G
chr7	9392442	T	C	PASS	C	intron_variant	MODIFIER	KCNH1	KCNH1	transcript	XM_038542056.1	protein_coding	6	c.951+4717A>G
chr7	9415937	T	C	PASS	C	intron_variant	MODIFIER	KCNH1	KCNH1	transcript	XM_038542056.1	protein_coding	5	c.558+15680A>G
chr7	9641437	C	G	PASS	G	intergenic_region	MODIFIER	RCOR3-TRAF5	RCOR3-TRAF5	intergenic_region	RCOR3_3-TRAF5_3		-1	n.9641437C>G
chr7	41845795	G	A	PASS	A	intron_variant	MODIFIER	LOC119876447_1	LOC119876447_1	transcript	XR_005362368.1	pseudogene	1	n.127+1684C>T
chr7	47933306	G	GGAAAATTTTTCTTCCAAAAAAAAAAAAAAAAAAAAAAAAAAAAAAAAAAAAAAA	PASS	GGAAAATTTTTCTTCCAAAAAAAAAAAAAAAAAAAAAAAAAAAAAAAAAAAAAAA	intron_variant	MODIFIER	RIT2	RIT2	transcript	XM_038543396.1	protein_coding	4	c.426+75182_426+75183insGAAAATTTTTCTTCCAAAAAAAAAAAAAAAAAAAAAAAAAAAAAAAAAAAAAAA
chr7	47933306	G	GGAAAATTTTTCTTCCAAAAAAAAAAAAAAAAAAAAAAAAAAAAAAAAAAAAAAA	PASS	GGAAAATTTTTCTTCCAAAAAAAAAAAAAAAAAAAAAAAAAAAAAAAAAAAAAAA	intron_variant	MODIFIER	RIT2	RIT2	transcript	XM_038543397.1	protein_coding	4	c.357+75182_357+75183insGAAAATTTTTCTTCCAAAAAAAAAAAAAAAAAAAAAAAAAAAAAAAAAAAAAAA
chr7	47933306	G	GGAAAATTTTTCTTCCAAAAAAAAAAAAAAAAAAAAAAAAAAAAAAAAAAAAAAA	PASS	GGAAAATTTTTCTTCCAAAAAAAAAAAAAAAAAAAAAAAAAAAAAAAAAAAAAAA	intron_variant	MODIFIER	RIT2	RIT2	transcript	XM_038543398.1	protein_coding	5	c.321+75182_321+75183insGAAAATTTTTCTTCCAAAAAAAAAAAAAAAAAAAAAAAAAAAAAAAAAAAAAAA
chr7	47933306	G	GGAAAATTTTTCTTCCAAAAAAAAAAAAAAAAAAAAAAAAAAAAAAAAAAAAAAA	PASS	GGAAAATTTTTCTTCCAAAAAAAAAAAAAAAAAAAAAAAAAAAAAAAAAAAAAAA	intron_variant	MODIFIER	RIT2	RIT2	transcript	XM_038543399.1	protein_coding	6	c.321+75182_321+75183insGAAAATTTTTCTTCCAAAAAAAAAAAAAAAAAAAAAAAAAAAAAAAAAAAAAAA
chr7	48225702	C	G	PASS	G	intergenic_region	MODIFIER	LOC111096901-LOC119872586	LOC111096901-LOC119872586	intergenic_region	LOC111096901_3-LOC119872586_3		-1	n.48225702C>G
chr7	48357893	G	A	PASS	A	intergenic_region	MODIFIER	LOC111096901-LOC119872586	LOC111096901-LOC119872586	intergenic_region	LOC111096901_3-LOC119872586_3		-1	n.48357893G>A
chr7	48507579	C	A	VQSRTrancheSNP99.90to100.00	A	intergenic_region	MODIFIER	LOC111096901-LOC119872586	LOC111096901-LOC119872586	intergenic_region	LOC111096901_3-LOC119872586_3		-1	n.48507579C>A
chr7	48700229	A	G	PASS	G	intron_variant	MODIFIER	PIK3C3	PIK3C3	transcript	NM_001287160.1_3	protein_coding	13	c.1485-2900T>C
chr7	48930519	A	G	PASS	G	intron_variant	MODIFIER	LOC111096759	LOC111096759	transcript	XR_005362457.1	pseudogene	3	n.3036-1012A>G
chr7	48930519	A	G	PASS	G	intron_variant	MODIFIER	LOC111096759	LOC111096759	transcript	XR_005362446.1	pseudogene	3	n.3036-1012A>G
chr7	48930519	A	G	PASS	G	intron_variant	MODIFIER	LOC111096759	LOC111096759	transcript	XR_005362448.1	pseudogene	4	n.2734-1012A>G
chr7	48930519	A	G	PASS	G	intron_variant	MODIFIER	LOC111096759	LOC111096759	transcript	XR_005362449.1	pseudogene	4	n.2951-1012A>G
chr7	48930519	A	G	PASS	G	intron_variant	MODIFIER	LOC111096759	LOC111096759	transcript	XR_005362450.1	pseudogene	2	n.2885-1012A>G
chr7	48930519	A	G	PASS	G	intron_variant	MODIFIER	LOC111096759	LOC111096759	transcript	XR_005362451.1	pseudogene	3	n.3035+6260A>G
chr7	48930519	A	G	PASS	G	intron_variant	MODIFIER	LOC111096759	LOC111096759	transcript	XR_005362452.1	pseudogene	3	n.3036-1012A>G
chr7	48930519	A	G	PASS	G	intron_variant	MODIFIER	LOC111096759	LOC111096759	transcript	XR_005362453.1	pseudogene	3	n.3036-1012A>G
chr7	48930519	A	G	PASS	G	intron_variant	MODIFIER	LOC111096759	LOC111096759	transcript	XR_005362454.1	pseudogene	3	n.3036-1012A>G
chr7	48930519	A	G	PASS	G	intron_variant	MODIFIER	LOC111096759	LOC111096759	transcript	XR_005362455.1	pseudogene	4	n.2871-1012A>G
chr7	48930519	A	G	PASS	G	intron_variant	MODIFIER	LOC111096759	LOC111096759	transcript	XR_005362456.1	pseudogene	2	n.2885-14847A>G
chr7	48930519	A	G	PASS	G	intron_variant	MODIFIER	LOC111096759	LOC111096759	transcript	XR_005362458.1	pseudogene	4	n.2764-1012A>G
chr7	48930519	A	G	PASS	G	intron_variant	MODIFIER	LOC111096759	LOC111096759	transcript	XR_005362459.1	pseudogene	3	n.3036-1012A>G
chr7	48930519	A	G	PASS	G	intron_variant	MODIFIER	LOC111096759	LOC111096759	transcript	XR_005362461.1	pseudogene	3	n.3036-1012A>G
chr7	48930519	A	G	PASS	G	intron_variant	MODIFIER	LOC111096759	LOC111096759	transcript	XR_005362462.1	pseudogene	3	n.3036-1012A>G
chr7	48930519	A	G	PASS	G	intron_variant	MODIFIER	LOC111096759	LOC111096759	transcript	XR_005362463.1	pseudogene	3	n.3036-1012A>G
chr7	48930519	A	G	PASS	G	intron_variant	MODIFIER	LOC111096759	LOC111096759	transcript	XR_005362447.1	pseudogene	4	n.1236-1012A>G
chr7	48930519	A	G	PASS	G	intron_variant	MODIFIER	LOC111096759	LOC111096759	transcript	XR_005362464.1	pseudogene	3	n.486-1012A>G
chr7	48930519	A	G	PASS	G	intron_variant	MODIFIER	LOC111096759	LOC111096759	transcript	XR_005362460.1	pseudogene	2	n.756-1012A>G
chr7	48930519	A	G	PASS	G	intron_variant	MODIFIER	LOC111096759	LOC111096759	transcript	XR_005362465.1	pseudogene	2	n.210-1012A>G
chr7	49008294	C	T	PASS	T	intergenic_region	MODIFIER	LOC111096759-LOC119876412	LOC111096759-LOC119876412	intergenic_region	LOC111096759_3-LOC119876412		-1	n.49008294C>T
chr7	49042312	T	C	PASS	C	intergenic_region	MODIFIER	LOC111096759-LOC119876412	LOC111096759-LOC119876412	intergenic_region	LOC111096759_3-LOC119876412		-1	n.49042312T>C
chr7	49151810	A	G	PASS	G	intergenic_region	MODIFIER	LOC111096759-LOC119876412	LOC111096759-LOC119876412	intergenic_region	LOC111096759_3-LOC119876412		-1	n.49151810A>G
chr7	49293328	C	T	PASS	T	intergenic_region	MODIFIER	LOC119876412-LOC111096903	LOC119876412-LOC111096903	intergenic_region	LOC119876412-LOC111096903_3		-1	n.49293328C>T
chr7	49372369	A	G	PASS	G	intron_variant	MODIFIER	LOC111096903	LOC111096903	transcript	XR_005361693.1	pseudogene	1	n.95+578A>G
chr7	49387284	A	AT	PASS	AT	downstream_gene_variant	MODIFIER	LOC111096903	LOC111096903	transcript	XR_005361693.1	pseudogene	-1	n.*4333_*4334insT
chr7	49387284	A	AT	PASS	AT	intron_variant	MODIFIER	LOC106559006	LOC106559006	transcript	XR_005361695.1	pseudogene	2	n.1428-302_1428-301insT
chr7	49387284	A	AT	PASS	AT	intron_variant	MODIFIER	LOC106559006	LOC106559006	transcript	XR_005361694.1	pseudogene	2	n.1428-302_1428-301insT
chr7	49387284	A	AT	PASS	AT	intron_variant	MODIFIER	LOC106559006	LOC106559006	transcript	XR_005361697.1	pseudogene	2	n.1428-302_1428-301insT
chr7	49387284	A	AT	PASS	AT	intron_variant	MODIFIER	LOC106559006	LOC106559006	transcript	XR_005361696.1	pseudogene	2	n.1428-302_1428-301insT
chr7	49408639	C	G	PASS	G	intron_variant	MODIFIER	LOC106559006	LOC106559006	transcript	XR_005361695.1	pseudogene	3	n.1523+20958C>G
chr7	49408639	C	G	PASS	G	intron_variant	MODIFIER	LOC106559006	LOC106559006	transcript	XR_005361694.1	pseudogene	3	n.1523+20958C>G
chr7	49408639	C	G	PASS	G	intron_variant	MODIFIER	LOC106559006	LOC106559006	transcript	XR_005361697.1	pseudogene	3	n.1523+20958C>G
chr7	49408639	C	G	PASS	G	intron_variant	MODIFIER	LOC106559006	LOC106559006	transcript	XR_005361696.1	pseudogene	3	n.1523+20958C>G
chr7	49576075	C	T	PASS	T	intron_variant	MODIFIER	LOC111096762	LOC111096762	transcript	XR_005362466.1	pseudogene	1	n.721+83867C>T
chr7	49664535	A	G	PASS	G	intron_variant	MODIFIER	LOC111096762	LOC111096762	transcript	XR_005362466.1	pseudogene	1	n.722-129179A>G
chr7	49791665	CT	C	PASS	C	intron_variant	MODIFIER	LOC111096762	LOC111096762	transcript	XR_005362466.1	pseudogene	1	n.722-2048delT
chr7	49791668	A	C	PASS	C	intron_variant	MODIFIER	LOC111096762	LOC111096762	transcript	XR_005362466.1	pseudogene	1	n.722-2046A>C
chr7	49834822	G	T	PASS	T	intergenic_region	MODIFIER	LOC111096762-LOC100856349	LOC111096762-LOC100856349	intergenic_region	LOC111096762_3-LOC100856349_3		-1	n.49834822G>T
chr7	49841503	G	C	PASS	C	intergenic_region	MODIFIER	LOC111096762-LOC100856349	LOC111096762-LOC100856349	intergenic_region	LOC111096762_3-LOC100856349_3		-1	n.49841503G>C
chr7	50955625	G	A	PASS	A	intergenic_region	MODIFIER	LOC119876413-LOC102153641	LOC119876413-LOC102153641	intergenic_region	LOC119876413-LOC102153641_3		-1	n.50955625G>A
chr7	50979365	G	A	PASS	A	intergenic_region	MODIFIER	LOC119876413-LOC102153641	LOC119876413-LOC102153641	intergenic_region	LOC119876413-LOC102153641_3		-1	n.50979365G>A
chr7	78125164	C	A	PASS	A	intron_variant	MODIFIER	SPIRE1	SPIRE1	transcript	XM_038543911.1	protein_coding	1	c.296-2745G>T
chr7	78125164	C	A	PASS	A	intron_variant	MODIFIER	SPIRE1	SPIRE1	transcript	XM_038543912.1	protein_coding	1	c.296-2745G>T
chr7	78125164	C	A	PASS	A	intron_variant	MODIFIER	SPIRE1	SPIRE1	transcript	XM_038543913.1	protein_coding	1	c.32-2745G>T
chr7	78125164	C	A	PASS	A	intron_variant	MODIFIER	SPIRE1	SPIRE1	transcript	XM_038543914.1	protein_coding	1	c.32-2745G>T
chr7	78125164	C	A	PASS	A	intron_variant	MODIFIER	SPIRE1	SPIRE1	transcript	XR_005362715.1	pseudogene	1	n.118-2745G>T
chr7	78165489	G	A	PASS	A	synonymous_variant	LOW	CEP76	CEP76	transcript	XM_038543915.1	protein_coding	10	c.1606C>T	p.Leu536Leu
chr7	78165489	G	A	PASS	A	synonymous_variant	LOW	CEP76	CEP76	transcript	XM_038543916.1	protein_coding	10	c.1606C>T	p.Leu536Leu
chr7	78165489	G	A	PASS	A	synonymous_variant	LOW	CEP76	CEP76	transcript	XM_038543917.1	protein_coding	10	c.1606C>T	p.Leu536Leu
chr7	78512031	A	G	PASS	G	intron_variant	MODIFIER	CEP192	CEP192	transcript	XM_038543931.1	protein_coding	7	c.755-5006A>G
chr7	78512031	A	G	PASS	G	intron_variant	MODIFIER	CEP192	CEP192	transcript	XR_005362717.1	pseudogene	7	n.947-5006A>G
chr7	78512031	A	G	PASS	G	intron_variant	MODIFIER	CEP192	CEP192	transcript	XM_038543938.1	protein_coding	7	c.755-5006A>G
chr7	78512031	A	G	PASS	G	intron_variant	MODIFIER	CEP192	CEP192	transcript	XM_038543933.1	protein_coding	7	c.755-5006A>G
chr7	78512031	A	G	PASS	G	intron_variant	MODIFIER	CEP192	CEP192	transcript	XM_038543934.1	protein_coding	7	c.755-5009A>G
chr7	78512031	A	G	PASS	G	intron_variant	MODIFIER	CEP192	CEP192	transcript	XM_038543935.1	protein_coding	7	c.755-5006A>G
chr7	78512031	A	G	PASS	G	intron_variant	MODIFIER	CEP192	CEP192	transcript	XM_038543936.1	protein_coding	7	c.755-5006A>G
chr7	78512031	A	G	PASS	G	intron_variant	MODIFIER	CEP192	CEP192	transcript	XM_038543937.1	protein_coding	7	c.755-5009A>G
chr7	78512031	A	G	PASS	G	intron_variant	MODIFIER	CEP192	CEP192	transcript	XM_038543939.1	protein_coding	7	c.755-5006A>G
chr7	78512031	A	G	PASS	G	intron_variant	MODIFIER	CEP192	CEP192	transcript	XM_038543932.1	protein_coding	7	c.755-5006A>G
chr7	79041808	C	T	PASS	T	intron_variant	MODIFIER	MYO5B	MYO5B	transcript	XM_038543976.1	protein_coding	21	c.2815-1995C>T
chr8	21082667	TA	T	PASS	T	intergenic_region	MODIFIER	LOC100684027-LOC119872988	LOC100684027-LOC119872988	intergenic_region	LOC100684027_3-LOC119872988_3		-1	n.21082668delA
chr8	36858213	GA	G	PASS	G	intergenic_region	MODIFIER	PRKCH-HIF1A	PRKCH-HIF1A	intergenic_region	PRKCH_3-HIF1A_3		-1	n.36858214delA
chr8	48339602	G	T	PASS	T	upstream_gene_variant	MODIFIER	LOC111097106	LOC111097106	transcript	XR_005363531.1	pseudogene	-1	n.-4795G>T
chr8	48339602	G	T	PASS	T	upstream_gene_variant	MODIFIER	LOC111097106	LOC111097106	transcript	XR_005363541.1	pseudogene	-1	n.-3798G>T
chr8	48339602	G	T	PASS	T	upstream_gene_variant	MODIFIER	LOC111097106	LOC111097106	transcript	XR_005363532.1	pseudogene	-1	n.-3801G>T
chr8	48339602	G	T	PASS	T	upstream_gene_variant	MODIFIER	LOC111097106	LOC111097106	transcript	XR_005363533.1	pseudogene	-1	n.-3801G>T
chr8	48339602	G	T	PASS	T	upstream_gene_variant	MODIFIER	LOC111097106	LOC111097106	transcript	XR_005363542.1	pseudogene	-1	n.-3801G>T
chr8	48339602	G	T	PASS	T	upstream_gene_variant	MODIFIER	LOC111097106	LOC111097106	transcript	XR_005363539.1	pseudogene	-1	n.-4795G>T
chr8	48339602	G	T	PASS	T	downstream_gene_variant	MODIFIER	RPS6KL1	RPS6KL1	transcript	XM_038545274.1	protein_coding	-1	c.*1240C>A
chr8	48339602	G	T	PASS	T	downstream_gene_variant	MODIFIER	RPS6KL1	RPS6KL1	transcript	XM_038545277.1	protein_coding	-1	c.*1240C>A
chr8	48339602	G	T	PASS	T	downstream_gene_variant	MODIFIER	RPS6KL1	RPS6KL1	transcript	XM_038545275.1	protein_coding	-1	c.*1240C>A
chr8	48339602	G	T	PASS	T	downstream_gene_variant	MODIFIER	RPS6KL1	RPS6KL1	transcript	XM_038545276.1	protein_coding	-1	c.*1240C>A
chr8	48339602	G	T	PASS	T	intron_variant	MODIFIER	DLST	DLST	transcript	XM_038545278.1	protein_coding	12	c.982-86G>T
chr8	48392598	A	G	PASS	G	upstream_gene_variant	MODIFIER	PGF	PGF	transcript	XM_038545295.1	protein_coding	-1	c.-2068T>C
chr8	48392598	A	G	PASS	G	upstream_gene_variant	MODIFIER	PGF	PGF	transcript	XM_038545294.1	protein_coding	-1	c.-2068T>C
chr8	48392598	A	G	PASS	G	upstream_gene_variant	MODIFIER	PGF	PGF	transcript	XM_038545296.1	protein_coding	-1	c.-2165T>C
chr8	48392598	A	G	PASS	G	intron_variant	MODIFIER	PGF	PGF	transcript	XM_038545286.1	protein_coding	4	c.-66+760T>C
chr8	48392598	A	G	PASS	G	intron_variant	MODIFIER	PGF	PGF	transcript	XM_038545291.1	protein_coding	4	c.18+760T>C
chr8	48392598	A	G	PASS	G	intron_variant	MODIFIER	PGF	PGF	transcript	XM_038545293.1	protein_coding	4	c.18+760T>C
chr8	48392598	A	G	PASS	G	intron_variant	MODIFIER	PGF	PGF	transcript	XM_038545288.1	protein_coding	3	c.114+760T>C
chr8	48392598	A	G	PASS	G	intron_variant	MODIFIER	PGF	PGF	transcript	XM_038545289.1	protein_coding	3	c.114+760T>C
chr8	48392598	A	G	PASS	G	intron_variant	MODIFIER	PGF	PGF	transcript	XM_038545292.1	protein_coding	4	c.-66+760T>C
chr8	48392598	A	G	PASS	G	intron_variant	MODIFIER	PGF	PGF	transcript	XM_038545287.1	protein_coding	4	c.-66+760T>C
chr8	48392598	A	G	PASS	G	intron_variant	MODIFIER	PGF	PGF	transcript	XM_038545290.1	protein_coding	4	c.-66+760T>C
chr8	48393417	G	A	PASS	A	missense_variant	MODERATE	PGF	PGF	transcript	XM_038545288.1	protein_coding	3	c.55C>T	p.Arg19Trp
chr8	48393417	G	A	PASS	A	missense_variant	MODERATE	PGF	PGF	transcript	XM_038545289.1	protein_coding	3	c.55C>T	p.Arg19Trp
chr8	48393417	G	A	PASS	A	5_prime_UTR_premature_start_codon_gain_variant	LOW	PGF	PGF	transcript	XM_038545286.1	protein_coding	4	c.-125C>T
chr8	48393417	G	A	PASS	A	5_prime_UTR_premature_start_codon_gain_variant	LOW	PGF	PGF	transcript	XM_038545291.1	protein_coding	4	c.-42C>T
chr8	48393417	G	A	PASS	A	5_prime_UTR_premature_start_codon_gain_variant	LOW	PGF	PGF	transcript	XM_038545293.1	protein_coding	4	c.-42C>T
chr8	48393417	G	A	PASS	A	5_prime_UTR_premature_start_codon_gain_variant	LOW	PGF	PGF	transcript	XM_038545292.1	protein_coding	4	c.-125C>T
chr8	48393417	G	A	PASS	A	5_prime_UTR_premature_start_codon_gain_variant	LOW	PGF	PGF	transcript	XM_038545287.1	protein_coding	4	c.-125C>T
chr8	48393417	G	A	PASS	A	5_prime_UTR_premature_start_codon_gain_variant	LOW	PGF	PGF	transcript	XM_038545290.1	protein_coding	4	c.-125C>T
chr8	48393417	G	A	PASS	A	5_prime_UTR_variant	MODIFIER	PGF	PGF	transcript	XM_038545286.1	protein_coding	4	c.-125C>T
chr8	48393417	G	A	PASS	A	5_prime_UTR_variant	MODIFIER	PGF	PGF	transcript	XM_038545291.1	protein_coding	4	c.-42C>T
chr8	48393417	G	A	PASS	A	5_prime_UTR_variant	MODIFIER	PGF	PGF	transcript	XM_038545293.1	protein_coding	4	c.-42C>T
chr8	48393417	G	A	PASS	A	5_prime_UTR_variant	MODIFIER	PGF	PGF	transcript	XM_038545292.1	protein_coding	4	c.-125C>T
chr8	48393417	G	A	PASS	A	5_prime_UTR_variant	MODIFIER	PGF	PGF	transcript	XM_038545287.1	protein_coding	4	c.-125C>T
chr8	48393417	G	A	PASS	A	5_prime_UTR_variant	MODIFIER	PGF	PGF	transcript	XM_038545290.1	protein_coding	4	c.-125C>T
chr8	48393417	G	A	PASS	A	upstream_gene_variant	MODIFIER	PGF	PGF	transcript	XM_038545295.1	protein_coding	-1	c.-2887C>T
chr8	48393417	G	A	PASS	A	upstream_gene_variant	MODIFIER	PGF	PGF	transcript	XM_038545294.1	protein_coding	-1	c.-2887C>T
chr8	48393417	G	A	PASS	A	upstream_gene_variant	MODIFIER	PGF	PGF	transcript	XM_038545296.1	protein_coding	-1	c.-2984C>T
chr8	48448327	C	T	PASS	T	intron_variant	MODIFIER	MLH3	MLH3	transcript	XM_038545279.1	protein_coding	9	c.4120-2880G>A
chr8	48448327	C	T	PASS	T	intron_variant	MODIFIER	MLH3	MLH3	transcript	XM_038545281.1	protein_coding	9	c.3994-2880G>A
chr8	48448327	C	T	PASS	T	intron_variant	MODIFIER	MLH3	MLH3	transcript	XM_038545282.1	protein_coding	9	c.3994-2880G>A
chr8	48448327	C	T	PASS	T	intron_variant	MODIFIER	MLH3	MLH3	transcript	XM_038545284.1	protein_coding	10	c.1249-2880G>A
chr8	48448327	C	T	PASS	T	intron_variant	MODIFIER	MLH3	MLH3	transcript	XM_038545280.1	protein_coding	8	c.4024-2880G>A
chr8	48448327	C	T	PASS	T	intron_variant	MODIFIER	MLH3	MLH3	transcript	XR_005363544.1	pseudogene	8	n.4017-2880G>A
chr8	48573865	T	C	PASS	C	intron_variant	MODIFIER	TMED10	TMED10	transcript	XM_038545301.1	protein_coding	1	c.225+1425A>G
chr8	48580385	A	G	PASS	G	upstream_gene_variant	MODIFIER	TMED10	TMED10	transcript	XM_038545301.1	protein_coding	-1	c.-4871T>C
chr8	48580385	A	G	PASS	G	upstream_gene_variant	MODIFIER	LOC111097227	LOC111097227	transcript	XR_005362896.1	pseudogene	-1	n.-2326A>G
chr8	48580385	A	G	PASS	G	intergenic_region	MODIFIER	TMED10-LOC111097227	TMED10-LOC111097227	intergenic_region	TMED10_3-LOC111097227_3		-1	n.48580385A>G
chr8	48691238	C	T	PASS	T	downstream_gene_variant	MODIFIER	LOC111097109	LOC111097109	transcript	XR_005363549.1	pseudogene	-1	n.*2089C>T
chr8	48691238	C	T	PASS	T	non_coding_transcript_exon_variant	MODIFIER	LOC111097109	LOC111097109	transcript	XR_005363550.1	pseudogene	4	n.589C>T
chr8	48727649	A	T	PASS	T	intron_variant	MODIFIER	LOC119872904	LOC119872904	transcript	XR_005363552.1	pseudogene	3	n.239+3793A>T
chr8	48778887	C	A	PASS	A	upstream_gene_variant	MODIFIER	LOC119872903	LOC119872903	transcript	XR_005363551.1	pseudogene	-1	n.-1356G>T
chr8	48778887	C	A	PASS	A	intron_variant	MODIFIER	JDP2	JDP2	transcript	XM_038545302.1	protein_coding	2	c.321+4124C>A
chr8	48778887	C	A	PASS	A	intron_variant	MODIFIER	JDP2	JDP2	transcript	XM_038545306.1	protein_coding	2	c.201+4124C>A
chr8	48778887	C	A	PASS	A	intron_variant	MODIFIER	JDP2	JDP2	transcript	XM_038545305.1	protein_coding	2	c.201+4124C>A
chr8	48778887	C	A	PASS	A	intron_variant	MODIFIER	JDP2	JDP2	transcript	XM_038545303.1	protein_coding	2	c.201+4124C>A
chr8	48778887	C	A	PASS	A	intron_variant	MODIFIER	JDP2	JDP2	transcript	XM_038545304.1	protein_coding	2	c.201+4124C>A
chr8	49241617	T	C	PASS	C	intron_variant	MODIFIER	TGFB3	TGFB3	transcript	XM_038545338.1	protein_coding	5	c.1061+1206A>G
chr8	49728937	GC	G	PASS	G	intron_variant	MODIFIER	ESRRB	ESRRB	transcript	XM_038545351.1	protein_coding	6	c.1027+4116delC
chr8	49728937	GC	G	PASS	G	intron_variant	MODIFIER	ESRRB	ESRRB	transcript	XM_038545354.1	protein_coding	5	c.787+4116delC
chr8	49728937	GC	G	PASS	G	intron_variant	MODIFIER	ESRRB	ESRRB	transcript	XM_038545352.1	protein_coding	5	c.850+4116delC
chr8	49728937	GC	G	PASS	G	intron_variant	MODIFIER	ESRRB	ESRRB	transcript	XM_038545353.1	protein_coding	5	c.835+4116delC
chr8	49960081	A	T	PASS	T	intron_variant	MODIFIER	VASH1	VASH1	transcript	XM_038545375.1	protein_coding	5	c.524+53A>T
chr8	49960081	A	T	PASS	T	intron_variant	MODIFIER	VASH1	VASH1	transcript	XM_038545376.1	protein_coding	5	c.524+53A>T
chr8	49960081	A	T	PASS	T	intron_variant	MODIFIER	VASH1	VASH1	transcript	XM_038545378.1	protein_coding	5	c.524+53A>T
chr8	49960081	A	T	PASS	T	intron_variant	MODIFIER	VASH1	VASH1	transcript	XM_038545377.1	protein_coding	5	c.524+53A>T
chr8	50208757	G	C	PASS	C	intron_variant	MODIFIER	LOC102156872	LOC102156872	transcript	XR_005363586.1	pseudogene	2	n.186+3330G>C
chr8	50208757	G	C	PASS	C	intron_variant	MODIFIER	LOC102156872	LOC102156872	transcript	XR_005363589.1	pseudogene	2	n.186+3330G>C
chr8	50208757	G	C	PASS	C	intron_variant	MODIFIER	LOC102156872	LOC102156872	transcript	XR_005363587.1	pseudogene	2	n.186+3330G>C
chr8	50208757	G	C	PASS	C	intron_variant	MODIFIER	LOC102156872	LOC102156872	transcript	XR_005363588.1	pseudogene	2	n.186+3330G>C
chr8	50223740	C	T	PASS	T	intron_variant	MODIFIER	LOC111097118	LOC111097118	transcript	XR_005363581.1	pseudogene	4	n.1401+453G>A
chr8	50223740	C	T	PASS	T	intron_variant	MODIFIER	LOC111097118	LOC111097118	transcript	XR_005363582.1	pseudogene	4	n.1401+453G>A
chr8	50223740	C	T	PASS	T	intron_variant	MODIFIER	LOC111097118	LOC111097118	transcript	XR_005363584.1	pseudogene	5	n.829+453G>A
chr8	50223740	C	T	PASS	T	intron_variant	MODIFIER	LOC111097118	LOC111097118	transcript	XR_005363579.1	pseudogene	3	n.555-1765G>A
chr8	50223740	C	T	PASS	T	intron_variant	MODIFIER	LOC111097118	LOC111097118	transcript	XR_005363580.1	pseudogene	3	n.473-1765G>A
chr8	50223740	C	T	PASS	T	intron_variant	MODIFIER	LOC111097118	LOC111097118	transcript	XR_005363583.1	pseudogene	4	n.1401+453G>A
chr8	50360951	G	A	PASS	A	intron_variant	MODIFIER	TMEM63C	TMEM63C	transcript	XM_038545392.1	protein_coding	5	c.310-2248G>A
chr8	50360951	G	A	PASS	A	intron_variant	MODIFIER	TMEM63C	TMEM63C	transcript	XM_038545400.1	protein_coding	5	c.310-2248G>A
chr8	50360951	G	A	PASS	A	intron_variant	MODIFIER	TMEM63C	TMEM63C	transcript	XR_005363596.1	pseudogene	5	n.621-2248G>A
chr8	50360951	G	A	PASS	A	intron_variant	MODIFIER	TMEM63C	TMEM63C	transcript	XM_038545393.1	protein_coding	7	c.310-2248G>A
chr8	50360951	G	A	PASS	A	intron_variant	MODIFIER	TMEM63C	TMEM63C	transcript	XM_038545394.1	protein_coding	7	c.310-2248G>A
chr8	50360951	G	A	PASS	A	intron_variant	MODIFIER	TMEM63C	TMEM63C	transcript	XM_038545396.1	protein_coding	6	c.310-2248G>A
chr8	50360951	G	A	PASS	A	intron_variant	MODIFIER	TMEM63C	TMEM63C	transcript	XM_038545397.1	protein_coding	6	c.310-2248G>A
chr8	50360951	G	A	PASS	A	intron_variant	MODIFIER	TMEM63C	TMEM63C	transcript	XM_038545398.1	protein_coding	6	c.310-2248G>A
chr8	50360951	G	A	PASS	A	intron_variant	MODIFIER	TMEM63C	TMEM63C	transcript	XM_038545395.1	protein_coding	5	c.310-2248G>A
chr8	50394968	GGA	G	PASS	G	downstream_gene_variant	MODIFIER	TMEM63C	TMEM63C	transcript	XM_038545392.1	protein_coding	-1	c.*3663_*3664delGA
chr8	50394968	GGA	G	PASS	G	downstream_gene_variant	MODIFIER	NGB	NGB	transcript	NM_001003356.2_3	protein_coding	-1	c.*4550_*4551delTC
chr8	50394968	GGA	G	PASS	G	downstream_gene_variant	MODIFIER	TMEM63C	TMEM63C	transcript	XM_038545400.1	protein_coding	-1	c.*3663_*3664delGA
chr8	50394968	GGA	G	PASS	G	downstream_gene_variant	MODIFIER	TMEM63C	TMEM63C	transcript	XR_005363596.1	pseudogene	-1	n.*3726_*3727delGA
chr8	50394968	GGA	G	PASS	G	downstream_gene_variant	MODIFIER	TMEM63C	TMEM63C	transcript	XM_038545393.1	protein_coding	-1	c.*3663_*3664delGA
chr8	50394968	GGA	G	PASS	G	downstream_gene_variant	MODIFIER	TMEM63C	TMEM63C	transcript	XM_038545394.1	protein_coding	-1	c.*3663_*3664delGA
chr8	50394968	GGA	G	PASS	G	downstream_gene_variant	MODIFIER	TMEM63C	TMEM63C	transcript	XM_038545396.1	protein_coding	-1	c.*3663_*3664delGA
chr8	50394968	GGA	G	PASS	G	downstream_gene_variant	MODIFIER	TMEM63C	TMEM63C	transcript	XM_038545397.1	protein_coding	-1	c.*3663_*3664delGA
chr8	50394968	GGA	G	PASS	G	downstream_gene_variant	MODIFIER	TMEM63C	TMEM63C	transcript	XM_038545398.1	protein_coding	-1	c.*3663_*3664delGA
chr8	50394968	GGA	G	PASS	G	downstream_gene_variant	MODIFIER	TMEM63C	TMEM63C	transcript	XM_038545395.1	protein_coding	-1	c.*3663_*3664delGA
chr8	50394968	GGA	G	PASS	G	intergenic_region	MODIFIER	TMEM63C-NGB	TMEM63C-NGB	intergenic_region	TMEM63C_3-NGB_3		-1	n.50394969_50394970delGA
chr8	64019497	C	T	PASS	T	downstream_gene_variant	MODIFIER	GSC	GSC	transcript	XM_038545639.1	protein_coding	-1	c.*9810G>A
chr8	64019497	C	T	PASS	T	intron_variant	MODIFIER	GSC	GSC	transcript	XM_038545640.1	protein_coding	3	c.743-9688G>A
chr8	64399415	C	G	PASS	G	downstream_gene_variant	MODIFIER	CLMN	CLMN	transcript	XM_038545648.1	protein_coding	-1	c.*14711G>C
chr8	64399415	C	G	PASS	G	intergenic_region	MODIFIER	DICER1-CLMN	DICER1-CLMN	intergenic_region	DICER1_3-CLMN_3		-1	n.64399415C>G
chr8	64521308	G	A	PASS	A	upstream_gene_variant	MODIFIER	CLMN	CLMN	transcript	XM_038545648.1	protein_coding	-1	c.-1662C>T
chr8	64521308	G	A	PASS	A	upstream_gene_variant	MODIFIER	CLMN	CLMN	transcript	XR_005363729.1	pseudogene	-1	n.-1636C>T
chr8	64521308	G	A	PASS	A	upstream_gene_variant	MODIFIER	CLMN	CLMN	transcript	XR_005363730.1	pseudogene	-1	n.-1636C>T
chr8	64521308	G	A	PASS	A	upstream_gene_variant	MODIFIER	CLMN	CLMN	transcript	XR_005363731.1	pseudogene	-1	n.-1636C>T
chr8	64521308	G	A	PASS	A	intergenic_region	MODIFIER	CLMN-LOC106559136	CLMN-LOC106559136	intergenic_region	CLMN_3-LOC106559136_3		-1	n.64521308G>A
chr8	64719541	G	A	PASS	A	intron_variant	MODIFIER	GLRX5	GLRX5	transcript	XM_038545655.1	protein_coding	1	c.296-747G>A
chr8	64719541	G	A	PASS	A	intron_variant	MODIFIER	GLRX5	GLRX5	transcript	XR_005363742.1	pseudogene	2	n.861+35G>A
chr8	64840971	G	C	PASS	C	intergenic_region	MODIFIER	TCL1B-LOC119873040	TCL1B-LOC119873040	intergenic_region	TCL1B_3-LOC119873040_3		-1	n.64840971G>C
chr8	64873900	C	T	PASS	T	upstream_gene_variant	MODIFIER	LOC100686899	LOC100686899	transcript	XM_038544058.1	protein_coding	-1	c.-1315G>A
chr8	64873900	C	T	PASS	T	intergenic_region	MODIFIER	LOC100686899-LOC111097153	LOC100686899-LOC111097153	intergenic_region	LOC100686899_3-LOC111097153_3		-1	n.64873900C>T
chr8	64906244	G	A	PASS	A	intergenic_region	MODIFIER	LOC100686899-LOC111097153	LOC100686899-LOC111097153	intergenic_region	LOC100686899_3-LOC111097153_3		-1	n.64906244G>A
chr8	65029933	G	A	PASS	A	intron_variant	MODIFIER	LOC111097153	LOC111097153	transcript	XR_005363743.1	pseudogene	2	n.491-20192G>A
chr8	65130570	G	A	PASS	A	intergenic_region	MODIFIER	LOC111097153-C8H14orf132	LOC111097153-C8H14orf132	intergenic_region	LOC111097153_3-C8H14orf132_3		-1	n.65130570G>A
chr8	65144443	A	AG	PASS	AG	intron_variant	MODIFIER	C8H14orf132	C8H14orf132	transcript	XM_038545656.1	protein_coding	1	c.27+619_27+620insG
chr8	65189278	C	T	PASS	T	3_prime_UTR_variant	MODIFIER	C8H14orf132	C8H14orf132	transcript	XM_038545656.1	protein_coding	2	c.*4999C>T
chr8	65226561	C	A	PASS	A	intergenic_region	MODIFIER	C8H14orf132-LOC119873022	C8H14orf132-LOC119873022	intergenic_region	C8H14orf132_3-LOC119873022_3		-1	n.65226561C>A
chr8	65228575	G	A	PASS	A	intergenic_region	MODIFIER	C8H14orf132-LOC119873022	C8H14orf132-LOC119873022	intergenic_region	C8H14orf132_3-LOC119873022_3		-1	n.65228575G>A
chr8	65230760	A	T	PASS	T	intergenic_region	MODIFIER	C8H14orf132-LOC119873022	C8H14orf132-LOC119873022	intergenic_region	C8H14orf132_3-LOC119873022_3		-1	n.65230760A>T
chr8	65647939	C	G	PASS	G	intergenic_region	MODIFIER	PAPOLA-LOC111097155	PAPOLA-LOC111097155	intergenic_region	PAPOLA_3-LOC111097155_3		-1	n.65647939C>G
chr8	66088214	C	T	PASS	T	intergenic_region	MODIFIER	VRK1-LOC119873023	VRK1-LOC119873023	intergenic_region	VRK1_3-LOC119873023_3		-1	n.66088214C>T
chr8	66098723	C	G	PASS	G	intergenic_region	MODIFIER	VRK1-LOC119873023	VRK1-LOC119873023	intergenic_region	VRK1_3-LOC119873023_3		-1	n.66098723C>G
chr8	66265488	G	A	PASS	A	intergenic_region	MODIFIER	LOC119873023-LOC119873024	LOC119873023-LOC119873024	intergenic_region	LOC119873023_3-LOC119873024_3		-1	n.66265488G>A
chr8	66393289	G	T	PASS	T	intergenic_region	MODIFIER	LOC119873024-LOC119872923	LOC119873024-LOC119872923	intergenic_region	LOC119873024_3-LOC119872923_3		-1	n.66393289G>T
chr8	66750724	C	A	PASS	A	intergenic_region	MODIFIER	LOC119873025-LOC111097156	LOC119873025-LOC111097156	intergenic_region	LOC119873025_3-LOC111097156_3		-1	n.66750724C>A
chr8	67922508	C	T	PASS	T	intergenic_region	MODIFIER	LOC119873039-LOC111097248	LOC119873039-LOC111097248	intergenic_region	LOC119873039_3-LOC111097248_3		-1	n.67922508C>T
chr8	67994304	AAT	A	PASS	A	intergenic_region	MODIFIER	LOC111097248-BCL11B	LOC111097248-BCL11B	intergenic_region	LOC111097248_3-BCL11B_3		-1	n.67994305_67994306delAT
chr8	68106215	C	T	PASS	T	intron_variant	MODIFIER	BCL11B	BCL11B	transcript	XM_038545688.1	protein_coding	2	c.427+4941G>A
chr8	68106215	C	T	PASS	T	intron_variant	MODIFIER	BCL11B	BCL11B	transcript	XM_038545689.1	protein_coding	2	c.424+4941G>A
chr8	68106215	C	T	PASS	T	intron_variant	MODIFIER	BCL11B	BCL11B	transcript	XM_038545691.1	protein_coding	2	c.427+4941G>A
chr8	69652629	A	AT	PASS	AT	intron_variant	MODIFIER	LOC111097168_2	LOC111097168_2	transcript	XR_005363792.1	pseudogene	3	n.322+879_322+880insT
chr8	69652637	C	A	PASS	A	intron_variant	MODIFIER	LOC111097168_2	LOC111097168_2	transcript	XR_005363792.1	pseudogene	3	n.322+887C>A
chr8	71508677	T	TG	PASS	TG	upstream_gene_variant	MODIFIER	LOC119873132	LOC119873132	transcript	XR_005363925.1	snoRNA	-1	n.-1269_-1268insG
chr8	71508677	T	TG	PASS	TG	intron_variant	MODIFIER	EIF5	EIF5	transcript	XM_038545814.1	protein_coding	4	c.154+109_154+110insG
chr8	71508677	T	TG	PASS	TG	intron_variant	MODIFIER	EIF5	EIF5	transcript	XM_038545816.1	protein_coding	3	c.154+109_154+110insG
chr8	71508677	T	TG	PASS	TG	intron_variant	MODIFIER	EIF5	EIF5	transcript	XM_038545815.1	protein_coding	3	c.154+109_154+110insG
chr8	74354751	C	T	PASS	T	intergenic_region	MODIFIER	LOC119876538-LOC119876539	LOC119876538-LOC119876539	intergenic_region	LOC119876538-LOC119876539		-1	n.74354751C>T
chr8	74568005	A	G	PASS	G	missense_variant	MODERATE	LOC119869011_2	LOC119869011_2	transcript	unassigned_transcript_306	protein_coding	2	c.143T>C	p.Phe48Ser
chr9	5972693	CCCCCCCCG	C	PASS	C	intergenic_region	MODIFIER	LOC111097294-GRB2	LOC111097294-GRB2	intergenic_region	LOC111097294_3-GRB2_3		-1	n.5972694_5972701delCCCCCCCG
chr9	10221899	G	T	PASS	T	intron_variant	MODIFIER	LOC119873422	LOC119873422	transcript	XR_005363994.1	pseudogene	1	n.77-22067C>A
chr9	23497171	A	C	PASS	C	intergenic_region	MODIFIER	MLLT6-EPOP	MLLT6-EPOP	intergenic_region	MLLT6_3-EPOP_3		-1	n.23497171A>C
chr9	29835511	A	C	PASS	C	intergenic_region	MODIFIER	LOC111097388-LOC111097539	LOC111097388-LOC111097539	intergenic_region	LOC111097388_3-LOC111097539_3		-1	n.29835511A>C
chr9	30466262	C	T	PASS	T	intergenic_region	MODIFIER	LOC100684949-LOC111097540	LOC100684949-LOC111097540	intergenic_region	LOC100684949_3-LOC111097540_3		-1	n.30466262C>T
chr9	31498994	C	T	PASS	T	intergenic_region	MODIFIER	NOG-C9H17orf67	NOG-C9H17orf67	intergenic_region	NOG_3-C9H17orf67_3		-1	n.31498994C>T
chr9	31499023	C	T	PASS	T	intergenic_region	MODIFIER	NOG-C9H17orf67	NOG-C9H17orf67	intergenic_region	NOG_3-C9H17orf67_3		-1	n.31499023C>T
chr9	31499320	T	C	PASS	C	intergenic_region	MODIFIER	NOG-C9H17orf67	NOG-C9H17orf67	intergenic_region	NOG_3-C9H17orf67_3		-1	n.31499320T>C
chr9	31501949	T	C	PASS	C	intergenic_region	MODIFIER	NOG-C9H17orf67	NOG-C9H17orf67	intergenic_region	NOG_3-C9H17orf67_3		-1	n.31501949T>C
chr9	31504773	T	C	PASS	C	intergenic_region	MODIFIER	NOG-C9H17orf67	NOG-C9H17orf67	intergenic_region	NOG_3-C9H17orf67_3		-1	n.31504773T>C
chr9	31546169	C	T	PASS	T	intergenic_region	MODIFIER	NOG-C9H17orf67	NOG-C9H17orf67	intergenic_region	NOG_3-C9H17orf67_3		-1	n.31546169C>T
chr9	31557707	G	T	PASS	T	intergenic_region	MODIFIER	NOG-C9H17orf67	NOG-C9H17orf67	intergenic_region	NOG_3-C9H17orf67_3		-1	n.31557707G>T
chr9	31677228	G	A	PASS	A	intron_variant	MODIFIER	TRIM25	TRIM25	transcript	XM_038547807.1	protein_coding	3	c.912+1183C>T
chr9	31740145	G	C	PASS	C	intron_variant	MODIFIER	SCPEP1	SCPEP1	transcript	XM_038547825.1	protein_coding	3	c.306+999G>C
chr9	31740145	G	C	PASS	C	intron_variant	MODIFIER	SCPEP1	SCPEP1	transcript	XM_038547826.1	protein_coding	3	c.306+999G>C
chr9	31753779	G	C	PASS	C	intron_variant	MODIFIER	SCPEP1	SCPEP1	transcript	XM_038547825.1	protein_coding	8	c.778-250G>C
chr9	31753779	G	C	PASS	C	intron_variant	MODIFIER	SCPEP1	SCPEP1	transcript	XM_038547826.1	protein_coding	8	c.777+632G>C
chr9	31808141	G	T	PASS	T	intergenic_region	MODIFIER	LOC119876649_1-AKAP1	LOC119876649_1-AKAP1	intergenic_region	LOC119876649_1-AKAP1_3		-1	n.31808141G>T
chr9	31855539	G	A	PASS	A	intron_variant	MODIFIER	AKAP1	AKAP1	transcript	XM_038547809.1	protein_coding	4	c.1805-139G>A
chr9	31855539	G	A	PASS	A	intron_variant	MODIFIER	AKAP1	AKAP1	transcript	XM_038547817.1	protein_coding	2	c.1652-139G>A
chr9	31855539	G	A	PASS	A	intron_variant	MODIFIER	AKAP1	AKAP1	transcript	XM_038547824.1	protein_coding	4	c.1805-139G>A
chr9	31855539	G	A	PASS	A	intron_variant	MODIFIER	AKAP1	AKAP1	transcript	XM_038547823.1	protein_coding	4	c.1805-139G>A
chr9	31855539	G	A	PASS	A	intron_variant	MODIFIER	AKAP1	AKAP1	transcript	XM_038547822.1	protein_coding	4	c.1805-139G>A
chr9	31855539	G	A	PASS	A	intron_variant	MODIFIER	AKAP1	AKAP1	transcript	XM_038547811.1	protein_coding	3	c.1652-139G>A
chr9	31855539	G	A	PASS	A	intron_variant	MODIFIER	AKAP1	AKAP1	transcript	XM_038547812.1	protein_coding	3	c.1652-139G>A
chr9	31855539	G	A	PASS	A	intron_variant	MODIFIER	AKAP1	AKAP1	transcript	XM_038547813.1	protein_coding	4	c.1652-139G>A
chr9	31855539	G	A	PASS	A	intron_variant	MODIFIER	AKAP1	AKAP1	transcript	XM_038547814.1	protein_coding	4	c.1652-139G>A
chr9	31855539	G	A	PASS	A	intron_variant	MODIFIER	AKAP1	AKAP1	transcript	XM_038547815.1	protein_coding	2	c.1652-139G>A
chr9	31855539	G	A	PASS	A	intron_variant	MODIFIER	AKAP1	AKAP1	transcript	XM_038547818.1	protein_coding	3	c.1652-139G>A
chr9	31855539	G	A	PASS	A	intron_variant	MODIFIER	AKAP1	AKAP1	transcript	XM_038547819.1	protein_coding	3	c.1652-139G>A
chr9	31855539	G	A	PASS	A	intron_variant	MODIFIER	AKAP1	AKAP1	transcript	XM_038547821.1	protein_coding	2	c.1652-139G>A
chr9	31855539	G	A	PASS	A	intron_variant	MODIFIER	AKAP1	AKAP1	transcript	XM_038547810.1	protein_coding	4	c.1805-139G>A
chr9	31855539	G	A	PASS	A	intron_variant	MODIFIER	AKAP1	AKAP1	transcript	XM_038547820.1	protein_coding	2	c.1652-139G>A
chr9	31855539	G	A	PASS	A	intron_variant	MODIFIER	AKAP1	AKAP1	transcript	XM_038547816.1	protein_coding	2	c.1652-139G>A
chr9	31904492	A	G	PASS	G	intergenic_region	MODIFIER	AKAP1-LOC119873519	AKAP1-LOC119873519	intergenic_region	AKAP1_3-LOC119873519_3		-1	n.31904492A>G
chr9	31904744	G	T	PASS	T	intergenic_region	MODIFIER	AKAP1-LOC119873519	AKAP1-LOC119873519	intergenic_region	AKAP1_3-LOC119873519_3		-1	n.31904744G>T
chr9	31999565	T	TGGGCACCTGCTTCTCATGCCTCTATGTGTACCAGGGATGCTGGACTGGAGGC	PASS	TGGGCACCTGCTTCTCATGCCTCTATGTGTACCAGGGATGCTGGACTGGAGGC	intron_variant	MODIFIER	MSI2	MSI2	transcript	XM_038547828.1	protein_coding	5	c.312+15965_312+15966insGGGCACCTGCTTCTCATGCCTCTATGTGTACCAGGGATGCTGGACTGGAGGC
chr9	31999565	T	TGGGCACCTGCTTCTCATGCCTCTATGTGTACCAGGGATGCTGGACTGGAGGC	PASS	TGGGCACCTGCTTCTCATGCCTCTATGTGTACCAGGGATGCTGGACTGGAGGC	intron_variant	MODIFIER	MSI2	MSI2	transcript	XM_038547843.1	protein_coding	5	c.312+15965_312+15966insGGGCACCTGCTTCTCATGCCTCTATGTGTACCAGGGATGCTGGACTGGAGGC
chr9	31999565	T	TGGGCACCTGCTTCTCATGCCTCTATGTGTACCAGGGATGCTGGACTGGAGGC	PASS	TGGGCACCTGCTTCTCATGCCTCTATGTGTACCAGGGATGCTGGACTGGAGGC	intron_variant	MODIFIER	MSI2	MSI2	transcript	XM_038547829.1	protein_coding	5	c.312+15965_312+15966insGGGCACCTGCTTCTCATGCCTCTATGTGTACCAGGGATGCTGGACTGGAGGC
chr9	31999565	T	TGGGCACCTGCTTCTCATGCCTCTATGTGTACCAGGGATGCTGGACTGGAGGC	PASS	TGGGCACCTGCTTCTCATGCCTCTATGTGTACCAGGGATGCTGGACTGGAGGC	intron_variant	MODIFIER	MSI2	MSI2	transcript	XM_038547830.1	protein_coding	5	c.312+15965_312+15966insGGGCACCTGCTTCTCATGCCTCTATGTGTACCAGGGATGCTGGACTGGAGGC
chr9	31999565	T	TGGGCACCTGCTTCTCATGCCTCTATGTGTACCAGGGATGCTGGACTGGAGGC	PASS	TGGGCACCTGCTTCTCATGCCTCTATGTGTACCAGGGATGCTGGACTGGAGGC	intron_variant	MODIFIER	MSI2	MSI2	transcript	XM_038547831.1	protein_coding	5	c.312+15965_312+15966insGGGCACCTGCTTCTCATGCCTCTATGTGTACCAGGGATGCTGGACTGGAGGC
chr9	31999565	T	TGGGCACCTGCTTCTCATGCCTCTATGTGTACCAGGGATGCTGGACTGGAGGC	PASS	TGGGCACCTGCTTCTCATGCCTCTATGTGTACCAGGGATGCTGGACTGGAGGC	intron_variant	MODIFIER	MSI2	MSI2	transcript	XM_038547832.1	protein_coding	5	c.312+15965_312+15966insGGGCACCTGCTTCTCATGCCTCTATGTGTACCAGGGATGCTGGACTGGAGGC
chr9	31999565	T	TGGGCACCTGCTTCTCATGCCTCTATGTGTACCAGGGATGCTGGACTGGAGGC	PASS	TGGGCACCTGCTTCTCATGCCTCTATGTGTACCAGGGATGCTGGACTGGAGGC	intron_variant	MODIFIER	MSI2	MSI2	transcript	XM_038547833.1	protein_coding	5	c.312+15965_312+15966insGGGCACCTGCTTCTCATGCCTCTATGTGTACCAGGGATGCTGGACTGGAGGC
chr9	31999565	T	TGGGCACCTGCTTCTCATGCCTCTATGTGTACCAGGGATGCTGGACTGGAGGC	PASS	TGGGCACCTGCTTCTCATGCCTCTATGTGTACCAGGGATGCTGGACTGGAGGC	intron_variant	MODIFIER	MSI2	MSI2	transcript	XM_038547835.1	protein_coding	5	c.312+15965_312+15966insGGGCACCTGCTTCTCATGCCTCTATGTGTACCAGGGATGCTGGACTGGAGGC
chr9	31999565	T	TGGGCACCTGCTTCTCATGCCTCTATGTGTACCAGGGATGCTGGACTGGAGGC	PASS	TGGGCACCTGCTTCTCATGCCTCTATGTGTACCAGGGATGCTGGACTGGAGGC	intron_variant	MODIFIER	MSI2	MSI2	transcript	XM_038547836.1	protein_coding	5	c.312+15965_312+15966insGGGCACCTGCTTCTCATGCCTCTATGTGTACCAGGGATGCTGGACTGGAGGC
chr9	31999565	T	TGGGCACCTGCTTCTCATGCCTCTATGTGTACCAGGGATGCTGGACTGGAGGC	PASS	TGGGCACCTGCTTCTCATGCCTCTATGTGTACCAGGGATGCTGGACTGGAGGC	intron_variant	MODIFIER	MSI2	MSI2	transcript	XM_038547837.1	protein_coding	5	c.312+15965_312+15966insGGGCACCTGCTTCTCATGCCTCTATGTGTACCAGGGATGCTGGACTGGAGGC
chr9	31999565	T	TGGGCACCTGCTTCTCATGCCTCTATGTGTACCAGGGATGCTGGACTGGAGGC	PASS	TGGGCACCTGCTTCTCATGCCTCTATGTGTACCAGGGATGCTGGACTGGAGGC	intron_variant	MODIFIER	MSI2	MSI2	transcript	XM_038547838.1	protein_coding	5	c.312+15965_312+15966insGGGCACCTGCTTCTCATGCCTCTATGTGTACCAGGGATGCTGGACTGGAGGC
chr9	31999565	T	TGGGCACCTGCTTCTCATGCCTCTATGTGTACCAGGGATGCTGGACTGGAGGC	PASS	TGGGCACCTGCTTCTCATGCCTCTATGTGTACCAGGGATGCTGGACTGGAGGC	intron_variant	MODIFIER	MSI2	MSI2	transcript	XM_038547839.1	protein_coding	5	c.312+15965_312+15966insGGGCACCTGCTTCTCATGCCTCTATGTGTACCAGGGATGCTGGACTGGAGGC
chr9	31999565	T	TGGGCACCTGCTTCTCATGCCTCTATGTGTACCAGGGATGCTGGACTGGAGGC	PASS	TGGGCACCTGCTTCTCATGCCTCTATGTGTACCAGGGATGCTGGACTGGAGGC	intron_variant	MODIFIER	MSI2	MSI2	transcript	XM_038547840.1	protein_coding	5	c.312+15965_312+15966insGGGCACCTGCTTCTCATGCCTCTATGTGTACCAGGGATGCTGGACTGGAGGC
chr9	31999565	T	TGGGCACCTGCTTCTCATGCCTCTATGTGTACCAGGGATGCTGGACTGGAGGC	PASS	TGGGCACCTGCTTCTCATGCCTCTATGTGTACCAGGGATGCTGGACTGGAGGC	intron_variant	MODIFIER	MSI2	MSI2	transcript	XM_038547841.1	protein_coding	5	c.312+15965_312+15966insGGGCACCTGCTTCTCATGCCTCTATGTGTACCAGGGATGCTGGACTGGAGGC
chr9	31999565	T	TGGGCACCTGCTTCTCATGCCTCTATGTGTACCAGGGATGCTGGACTGGAGGC	PASS	TGGGCACCTGCTTCTCATGCCTCTATGTGTACCAGGGATGCTGGACTGGAGGC	intron_variant	MODIFIER	MSI2	MSI2	transcript	XM_038547842.1	protein_coding	5	c.312+15965_312+15966insGGGCACCTGCTTCTCATGCCTCTATGTGTACCAGGGATGCTGGACTGGAGGC
chr9	32077475	A	C	PASS	C	intron_variant	MODIFIER	MSI2	MSI2	transcript	XM_038547828.1	protein_coding	5	c.313-30759A>C
chr9	32077475	A	C	PASS	C	intron_variant	MODIFIER	LOC111097401	LOC111097401	transcript	XR_005364566.1	pseudogene	2	n.936+2370T>G
chr9	32077475	A	C	PASS	C	intron_variant	MODIFIER	MSI2	MSI2	transcript	XM_038547843.1	protein_coding	5	c.313-30759A>C
chr9	32077475	A	C	PASS	C	intron_variant	MODIFIER	MSI2	MSI2	transcript	XM_038547829.1	protein_coding	5	c.313-30759A>C
chr9	32077475	A	C	PASS	C	intron_variant	MODIFIER	MSI2	MSI2	transcript	XM_038547830.1	protein_coding	5	c.313-30759A>C
chr9	32077475	A	C	PASS	C	intron_variant	MODIFIER	MSI2	MSI2	transcript	XM_038547831.1	protein_coding	5	c.313-30759A>C
chr9	32077475	A	C	PASS	C	intron_variant	MODIFIER	MSI2	MSI2	transcript	XM_038547832.1	protein_coding	5	c.313-30759A>C
chr9	32077475	A	C	PASS	C	intron_variant	MODIFIER	MSI2	MSI2	transcript	XM_038547833.1	protein_coding	5	c.313-30759A>C
chr9	32077475	A	C	PASS	C	intron_variant	MODIFIER	MSI2	MSI2	transcript	XM_038547835.1	protein_coding	5	c.313-30759A>C
chr9	32077475	A	C	PASS	C	intron_variant	MODIFIER	MSI2	MSI2	transcript	XM_038547836.1	protein_coding	5	c.313-30759A>C
chr9	32077475	A	C	PASS	C	intron_variant	MODIFIER	MSI2	MSI2	transcript	XM_038547837.1	protein_coding	5	c.313-30759A>C
chr9	32077475	A	C	PASS	C	intron_variant	MODIFIER	MSI2	MSI2	transcript	XM_038547838.1	protein_coding	5	c.313-30759A>C
chr9	32077475	A	C	PASS	C	intron_variant	MODIFIER	MSI2	MSI2	transcript	XM_038547839.1	protein_coding	5	c.313-30759A>C
chr9	32077475	A	C	PASS	C	intron_variant	MODIFIER	MSI2	MSI2	transcript	XM_038547840.1	protein_coding	5	c.313-30759A>C
chr9	32077475	A	C	PASS	C	intron_variant	MODIFIER	MSI2	MSI2	transcript	XM_038547841.1	protein_coding	5	c.313-30759A>C
chr9	32077475	A	C	PASS	C	intron_variant	MODIFIER	MSI2	MSI2	transcript	XM_038547842.1	protein_coding	5	c.313-30759A>C
chr9	32077475	A	C	PASS	C	intron_variant	MODIFIER	LOC111097401	LOC111097401	transcript	XR_005364567.1	pseudogene	2	n.259+2370T>G
chr9	32105372	G	A	PASS	A	intron_variant	MODIFIER	MSI2	MSI2	transcript	XM_038547828.1	protein_coding	5	c.313-2862G>A
chr9	32105372	G	A	PASS	A	intron_variant	MODIFIER	MSI2	MSI2	transcript	XM_038547843.1	protein_coding	5	c.313-2862G>A
chr9	32105372	G	A	PASS	A	intron_variant	MODIFIER	MSI2	MSI2	transcript	XM_038547829.1	protein_coding	5	c.313-2862G>A
chr9	32105372	G	A	PASS	A	intron_variant	MODIFIER	MSI2	MSI2	transcript	XM_038547830.1	protein_coding	5	c.313-2862G>A
chr9	32105372	G	A	PASS	A	intron_variant	MODIFIER	MSI2	MSI2	transcript	XM_038547831.1	protein_coding	5	c.313-2862G>A
chr9	32105372	G	A	PASS	A	intron_variant	MODIFIER	MSI2	MSI2	transcript	XM_038547832.1	protein_coding	5	c.313-2862G>A
chr9	32105372	G	A	PASS	A	intron_variant	MODIFIER	MSI2	MSI2	transcript	XM_038547833.1	protein_coding	5	c.313-2862G>A
chr9	32105372	G	A	PASS	A	intron_variant	MODIFIER	MSI2	MSI2	transcript	XM_038547835.1	protein_coding	5	c.313-2862G>A
chr9	32105372	G	A	PASS	A	intron_variant	MODIFIER	MSI2	MSI2	transcript	XM_038547836.1	protein_coding	5	c.313-2862G>A
chr9	32105372	G	A	PASS	A	intron_variant	MODIFIER	MSI2	MSI2	transcript	XM_038547837.1	protein_coding	5	c.313-2862G>A
chr9	32105372	G	A	PASS	A	intron_variant	MODIFIER	MSI2	MSI2	transcript	XM_038547838.1	protein_coding	5	c.313-2862G>A
chr9	32105372	G	A	PASS	A	intron_variant	MODIFIER	MSI2	MSI2	transcript	XM_038547839.1	protein_coding	5	c.313-2862G>A
chr9	32105372	G	A	PASS	A	intron_variant	MODIFIER	MSI2	MSI2	transcript	XM_038547840.1	protein_coding	5	c.313-2862G>A
chr9	32105372	G	A	PASS	A	intron_variant	MODIFIER	MSI2	MSI2	transcript	XM_038547841.1	protein_coding	5	c.313-2862G>A
chr9	32105372	G	A	PASS	A	intron_variant	MODIFIER	MSI2	MSI2	transcript	XM_038547842.1	protein_coding	5	c.313-2862G>A
chr9	32153115	A	C	PASS	C	intron_variant	MODIFIER	MSI2	MSI2	transcript	XM_038547828.1	protein_coding	6	c.405+44789A>C
chr9	32153115	A	C	PASS	C	intron_variant	MODIFIER	MSI2	MSI2	transcript	XM_038547843.1	protein_coding	6	c.405+44789A>C
chr9	32153115	A	C	PASS	C	intron_variant	MODIFIER	MSI2	MSI2	transcript	XM_038547829.1	protein_coding	6	c.405+44789A>C
chr9	32153115	A	C	PASS	C	intron_variant	MODIFIER	MSI2	MSI2	transcript	XM_038547830.1	protein_coding	6	c.405+44789A>C
chr9	32153115	A	C	PASS	C	intron_variant	MODIFIER	MSI2	MSI2	transcript	XM_038547831.1	protein_coding	6	c.405+44789A>C
chr9	32153115	A	C	PASS	C	intron_variant	MODIFIER	MSI2	MSI2	transcript	XM_038547832.1	protein_coding	6	c.405+44789A>C
chr9	32153115	A	C	PASS	C	intron_variant	MODIFIER	MSI2	MSI2	transcript	XM_038547833.1	protein_coding	6	c.405+44789A>C
chr9	32153115	A	C	PASS	C	intron_variant	MODIFIER	MSI2	MSI2	transcript	XM_038547835.1	protein_coding	6	c.405+44789A>C
chr9	32153115	A	C	PASS	C	intron_variant	MODIFIER	MSI2	MSI2	transcript	XM_038547836.1	protein_coding	6	c.405+44789A>C
chr9	32153115	A	C	PASS	C	intron_variant	MODIFIER	MSI2	MSI2	transcript	XM_038547837.1	protein_coding	6	c.405+44789A>C
chr9	32153115	A	C	PASS	C	intron_variant	MODIFIER	MSI2	MSI2	transcript	XM_038547838.1	protein_coding	6	c.405+44789A>C
chr9	32153115	A	C	PASS	C	intron_variant	MODIFIER	MSI2	MSI2	transcript	XM_038547839.1	protein_coding	6	c.405+44789A>C
chr9	32153115	A	C	PASS	C	intron_variant	MODIFIER	MSI2	MSI2	transcript	XM_038547840.1	protein_coding	6	c.405+44789A>C
chr9	32153115	A	C	PASS	C	intron_variant	MODIFIER	MSI2	MSI2	transcript	XM_038547841.1	protein_coding	6	c.405+44789A>C
chr9	32153115	A	C	PASS	C	intron_variant	MODIFIER	MSI2	MSI2	transcript	XM_038547842.1	protein_coding	6	c.405+44789A>C
chr9	32161731	T	TA	PASS	TA	intron_variant	MODIFIER	MSI2	MSI2	transcript	XM_038547828.1	protein_coding	6	c.405+53405_405+53406insA
chr9	32161731	T	TA	PASS	TA	intron_variant	MODIFIER	MSI2	MSI2	transcript	XM_038547843.1	protein_coding	6	c.405+53405_405+53406insA
chr9	32161731	T	TA	PASS	TA	intron_variant	MODIFIER	MSI2	MSI2	transcript	XM_038547829.1	protein_coding	6	c.405+53405_405+53406insA
chr9	32161731	T	TA	PASS	TA	intron_variant	MODIFIER	MSI2	MSI2	transcript	XM_038547830.1	protein_coding	6	c.405+53405_405+53406insA
chr9	32161731	T	TA	PASS	TA	intron_variant	MODIFIER	MSI2	MSI2	transcript	XM_038547831.1	protein_coding	6	c.405+53405_405+53406insA
chr9	32161731	T	TA	PASS	TA	intron_variant	MODIFIER	MSI2	MSI2	transcript	XM_038547832.1	protein_coding	6	c.405+53405_405+53406insA
chr9	32161731	T	TA	PASS	TA	intron_variant	MODIFIER	MSI2	MSI2	transcript	XM_038547833.1	protein_coding	6	c.405+53405_405+53406insA
chr9	32161731	T	TA	PASS	TA	intron_variant	MODIFIER	MSI2	MSI2	transcript	XM_038547835.1	protein_coding	6	c.405+53405_405+53406insA
chr9	32161731	T	TA	PASS	TA	intron_variant	MODIFIER	MSI2	MSI2	transcript	XM_038547836.1	protein_coding	6	c.405+53405_405+53406insA
chr9	32161731	T	TA	PASS	TA	intron_variant	MODIFIER	MSI2	MSI2	transcript	XM_038547837.1	protein_coding	6	c.405+53405_405+53406insA
chr9	32161731	T	TA	PASS	TA	intron_variant	MODIFIER	MSI2	MSI2	transcript	XM_038547838.1	protein_coding	6	c.405+53405_405+53406insA
chr9	32161731	T	TA	PASS	TA	intron_variant	MODIFIER	MSI2	MSI2	transcript	XM_038547839.1	protein_coding	6	c.405+53405_405+53406insA
chr9	32161731	T	TA	PASS	TA	intron_variant	MODIFIER	MSI2	MSI2	transcript	XM_038547840.1	protein_coding	6	c.405+53405_405+53406insA
chr9	32161731	T	TA	PASS	TA	intron_variant	MODIFIER	MSI2	MSI2	transcript	XM_038547841.1	protein_coding	6	c.405+53405_405+53406insA
chr9	32161731	T	TA	PASS	TA	intron_variant	MODIFIER	MSI2	MSI2	transcript	XM_038547842.1	protein_coding	6	c.405+53405_405+53406insA
chr9	32163834	C	T	PASS	T	intron_variant	MODIFIER	MSI2	MSI2	transcript	XM_038547828.1	protein_coding	6	c.405+55508C>T
chr9	32163834	C	T	PASS	T	intron_variant	MODIFIER	MSI2	MSI2	transcript	XM_038547843.1	protein_coding	6	c.405+55508C>T
chr9	32163834	C	T	PASS	T	intron_variant	MODIFIER	MSI2	MSI2	transcript	XM_038547829.1	protein_coding	6	c.405+55508C>T
chr9	32163834	C	T	PASS	T	intron_variant	MODIFIER	MSI2	MSI2	transcript	XM_038547830.1	protein_coding	6	c.405+55508C>T
chr9	32163834	C	T	PASS	T	intron_variant	MODIFIER	MSI2	MSI2	transcript	XM_038547831.1	protein_coding	6	c.405+55508C>T
chr9	32163834	C	T	PASS	T	intron_variant	MODIFIER	MSI2	MSI2	transcript	XM_038547832.1	protein_coding	6	c.405+55508C>T
chr9	32163834	C	T	PASS	T	intron_variant	MODIFIER	MSI2	MSI2	transcript	XM_038547833.1	protein_coding	6	c.405+55508C>T
chr9	32163834	C	T	PASS	T	intron_variant	MODIFIER	MSI2	MSI2	transcript	XM_038547835.1	protein_coding	6	c.405+55508C>T
chr9	32163834	C	T	PASS	T	intron_variant	MODIFIER	MSI2	MSI2	transcript	XM_038547836.1	protein_coding	6	c.405+55508C>T
chr9	32163834	C	T	PASS	T	intron_variant	MODIFIER	MSI2	MSI2	transcript	XM_038547837.1	protein_coding	6	c.405+55508C>T
chr9	32163834	C	T	PASS	T	intron_variant	MODIFIER	MSI2	MSI2	transcript	XM_038547838.1	protein_coding	6	c.405+55508C>T
chr9	32163834	C	T	PASS	T	intron_variant	MODIFIER	MSI2	MSI2	transcript	XM_038547839.1	protein_coding	6	c.405+55508C>T
chr9	32163834	C	T	PASS	T	intron_variant	MODIFIER	MSI2	MSI2	transcript	XM_038547840.1	protein_coding	6	c.405+55508C>T
chr9	32163834	C	T	PASS	T	intron_variant	MODIFIER	MSI2	MSI2	transcript	XM_038547841.1	protein_coding	6	c.405+55508C>T
chr9	32163834	C	T	PASS	T	intron_variant	MODIFIER	MSI2	MSI2	transcript	XM_038547842.1	protein_coding	6	c.405+55508C>T
chr9	32180385	C	T	PASS	T	intron_variant	MODIFIER	MSI2	MSI2	transcript	XM_038547828.1	protein_coding	6	c.406-43906C>T
chr9	32180385	C	T	PASS	T	intron_variant	MODIFIER	MSI2	MSI2	transcript	XM_038547843.1	protein_coding	6	c.406-43906C>T
chr9	32180385	C	T	PASS	T	intron_variant	MODIFIER	MSI2	MSI2	transcript	XM_038547829.1	protein_coding	6	c.406-43906C>T
chr9	32180385	C	T	PASS	T	intron_variant	MODIFIER	MSI2	MSI2	transcript	XM_038547830.1	protein_coding	6	c.406-43906C>T
chr9	32180385	C	T	PASS	T	intron_variant	MODIFIER	MSI2	MSI2	transcript	XM_038547831.1	protein_coding	6	c.406-43906C>T
chr9	32180385	C	T	PASS	T	intron_variant	MODIFIER	MSI2	MSI2	transcript	XM_038547832.1	protein_coding	6	c.406-43906C>T
chr9	32180385	C	T	PASS	T	intron_variant	MODIFIER	MSI2	MSI2	transcript	XM_038547833.1	protein_coding	6	c.406-43906C>T
chr9	32180385	C	T	PASS	T	intron_variant	MODIFIER	MSI2	MSI2	transcript	XM_038547835.1	protein_coding	6	c.406-43906C>T
chr9	32180385	C	T	PASS	T	intron_variant	MODIFIER	MSI2	MSI2	transcript	XM_038547836.1	protein_coding	6	c.406-43906C>T
chr9	32180385	C	T	PASS	T	intron_variant	MODIFIER	MSI2	MSI2	transcript	XM_038547837.1	protein_coding	6	c.406-43906C>T
chr9	32180385	C	T	PASS	T	intron_variant	MODIFIER	MSI2	MSI2	transcript	XM_038547838.1	protein_coding	6	c.406-43906C>T
chr9	32180385	C	T	PASS	T	intron_variant	MODIFIER	MSI2	MSI2	transcript	XM_038547839.1	protein_coding	6	c.406-43906C>T
chr9	32180385	C	T	PASS	T	intron_variant	MODIFIER	MSI2	MSI2	transcript	XM_038547840.1	protein_coding	6	c.406-43906C>T
chr9	32180385	C	T	PASS	T	intron_variant	MODIFIER	MSI2	MSI2	transcript	XM_038547841.1	protein_coding	6	c.406-43906C>T
chr9	32180385	C	T	PASS	T	intron_variant	MODIFIER	MSI2	MSI2	transcript	XM_038547842.1	protein_coding	6	c.406-43906C>T
chr9	32267954	A	G	PASS	G	intron_variant	MODIFIER	MSI2	MSI2	transcript	XM_038547828.1	protein_coding	7	c.455-21110A>G
chr9	32267954	A	G	PASS	G	intron_variant	MODIFIER	MSI2	MSI2	transcript	XM_038547843.1	protein_coding	7	c.455-21110A>G
chr9	32267954	A	G	PASS	G	intron_variant	MODIFIER	MSI2	MSI2	transcript	XM_038547829.1	protein_coding	7	c.455-21110A>G
chr9	32267954	A	G	PASS	G	intron_variant	MODIFIER	MSI2	MSI2	transcript	XM_038547830.1	protein_coding	7	c.455-21110A>G
chr9	32267954	A	G	PASS	G	intron_variant	MODIFIER	MSI2	MSI2	transcript	XM_038547831.1	protein_coding	7	c.455-21110A>G
chr9	32267954	A	G	PASS	G	intron_variant	MODIFIER	MSI2	MSI2	transcript	XM_038547832.1	protein_coding	7	c.455-21110A>G
chr9	32267954	A	G	PASS	G	intron_variant	MODIFIER	MSI2	MSI2	transcript	XM_038547833.1	protein_coding	7	c.455-21110A>G
chr9	32267954	A	G	PASS	G	intron_variant	MODIFIER	MSI2	MSI2	transcript	XM_038547835.1	protein_coding	7	c.455-21110A>G
chr9	32267954	A	G	PASS	G	intron_variant	MODIFIER	MSI2	MSI2	transcript	XM_038547836.1	protein_coding	7	c.455-21110A>G
chr9	32267954	A	G	PASS	G	intron_variant	MODIFIER	MSI2	MSI2	transcript	XM_038547837.1	protein_coding	7	c.455-21110A>G
chr9	32267954	A	G	PASS	G	intron_variant	MODIFIER	MSI2	MSI2	transcript	XM_038547838.1	protein_coding	7	c.455-21110A>G
chr9	32267954	A	G	PASS	G	intron_variant	MODIFIER	MSI2	MSI2	transcript	XM_038547839.1	protein_coding	7	c.455-21110A>G
chr9	32267954	A	G	PASS	G	intron_variant	MODIFIER	MSI2	MSI2	transcript	XM_038547840.1	protein_coding	7	c.455-21110A>G
chr9	32267954	A	G	PASS	G	intron_variant	MODIFIER	MSI2	MSI2	transcript	XM_038547841.1	protein_coding	7	c.455-21110A>G
chr9	32267954	A	G	PASS	G	intron_variant	MODIFIER	MSI2	MSI2	transcript	XM_038547842.1	protein_coding	7	c.455-21110A>G
chr9	32288396	A	ACGGCT	PASS	ACGGCT	intron_variant	MODIFIER	MSI2	MSI2	transcript	XM_038547828.1	protein_coding	7	c.455-668_455-667insCGGCT
chr9	32288396	A	ACGGCT	PASS	ACGGCT	intron_variant	MODIFIER	MSI2	MSI2	transcript	XM_038547843.1	protein_coding	7	c.455-668_455-667insCGGCT
chr9	32288396	A	ACGGCT	PASS	ACGGCT	intron_variant	MODIFIER	MSI2	MSI2	transcript	XM_038547829.1	protein_coding	7	c.455-668_455-667insCGGCT
chr9	32288396	A	ACGGCT	PASS	ACGGCT	intron_variant	MODIFIER	MSI2	MSI2	transcript	XM_038547830.1	protein_coding	7	c.455-668_455-667insCGGCT
chr9	32288396	A	ACGGCT	PASS	ACGGCT	intron_variant	MODIFIER	MSI2	MSI2	transcript	XM_038547831.1	protein_coding	7	c.455-668_455-667insCGGCT
chr9	32288396	A	ACGGCT	PASS	ACGGCT	intron_variant	MODIFIER	MSI2	MSI2	transcript	XM_038547832.1	protein_coding	7	c.455-668_455-667insCGGCT
chr9	32288396	A	ACGGCT	PASS	ACGGCT	intron_variant	MODIFIER	MSI2	MSI2	transcript	XM_038547833.1	protein_coding	7	c.455-668_455-667insCGGCT
chr9	32288396	A	ACGGCT	PASS	ACGGCT	intron_variant	MODIFIER	MSI2	MSI2	transcript	XM_038547835.1	protein_coding	7	c.455-668_455-667insCGGCT
chr9	32288396	A	ACGGCT	PASS	ACGGCT	intron_variant	MODIFIER	MSI2	MSI2	transcript	XM_038547836.1	protein_coding	7	c.455-668_455-667insCGGCT
chr9	32288396	A	ACGGCT	PASS	ACGGCT	intron_variant	MODIFIER	MSI2	MSI2	transcript	XM_038547837.1	protein_coding	7	c.455-668_455-667insCGGCT
chr9	32288396	A	ACGGCT	PASS	ACGGCT	intron_variant	MODIFIER	MSI2	MSI2	transcript	XM_038547838.1	protein_coding	7	c.455-668_455-667insCGGCT
chr9	32288396	A	ACGGCT	PASS	ACGGCT	intron_variant	MODIFIER	MSI2	MSI2	transcript	XM_038547839.1	protein_coding	7	c.455-668_455-667insCGGCT
chr9	32288396	A	ACGGCT	PASS	ACGGCT	intron_variant	MODIFIER	MSI2	MSI2	transcript	XM_038547840.1	protein_coding	7	c.455-668_455-667insCGGCT
chr9	32288396	A	ACGGCT	PASS	ACGGCT	intron_variant	MODIFIER	MSI2	MSI2	transcript	XM_038547841.1	protein_coding	7	c.455-668_455-667insCGGCT
chr9	32288396	A	ACGGCT	PASS	ACGGCT	intron_variant	MODIFIER	MSI2	MSI2	transcript	XM_038547842.1	protein_coding	7	c.455-668_455-667insCGGCT
chr9	32298477	C	G	PASS	G	intron_variant	MODIFIER	MSI2	MSI2	transcript	XM_038547828.1	protein_coding	8	c.538-8320C>G
chr9	32298477	C	G	PASS	G	intron_variant	MODIFIER	MSI2	MSI2	transcript	XM_038547843.1	protein_coding	8	c.538-8320C>G
chr9	32298477	C	G	PASS	G	intron_variant	MODIFIER	MSI2	MSI2	transcript	XM_038547829.1	protein_coding	8	c.538-8320C>G
chr9	32298477	C	G	PASS	G	intron_variant	MODIFIER	MSI2	MSI2	transcript	XM_038547830.1	protein_coding	8	c.538-8320C>G
chr9	32298477	C	G	PASS	G	intron_variant	MODIFIER	MSI2	MSI2	transcript	XM_038547831.1	protein_coding	8	c.538-8320C>G
chr9	32298477	C	G	PASS	G	intron_variant	MODIFIER	MSI2	MSI2	transcript	XM_038547832.1	protein_coding	8	c.538-8320C>G
chr9	32298477	C	G	PASS	G	intron_variant	MODIFIER	MSI2	MSI2	transcript	XM_038547833.1	protein_coding	8	c.538-8320C>G
chr9	32298477	C	G	PASS	G	intron_variant	MODIFIER	MSI2	MSI2	transcript	XM_038547835.1	protein_coding	8	c.538-8320C>G
chr9	32298477	C	G	PASS	G	intron_variant	MODIFIER	MSI2	MSI2	transcript	XM_038547836.1	protein_coding	8	c.538-8320C>G
chr9	32298477	C	G	PASS	G	intron_variant	MODIFIER	MSI2	MSI2	transcript	XM_038547837.1	protein_coding	8	c.538-8320C>G
chr9	32298477	C	G	PASS	G	intron_variant	MODIFIER	MSI2	MSI2	transcript	XM_038547838.1	protein_coding	8	c.538-8320C>G
chr9	32298477	C	G	PASS	G	intron_variant	MODIFIER	MSI2	MSI2	transcript	XM_038547839.1	protein_coding	8	c.538-8320C>G
chr9	32298477	C	G	PASS	G	intron_variant	MODIFIER	MSI2	MSI2	transcript	XM_038547840.1	protein_coding	8	c.538-8320C>G
chr9	32298477	C	G	PASS	G	intron_variant	MODIFIER	MSI2	MSI2	transcript	XM_038547841.1	protein_coding	8	c.538-8320C>G
[truncated: 3,011 more rows]

## Sheet: private heterozygous variants
Table S2. Private heterozygous variants in the genome of the affected Nova Scotia Duck Tolling Retriever. Variants were called with respect to the UU_Cfam_GSD_1.0 reference genome assembly. The functional annotation of the variants is based on the NCBI annotation release 106. The table is in "1 effect per line" format. Thus, one variant will be listed several times, if multiple effects, e.g. on d…
#CHROM	POS	REF	ALT	FILTER	ALLELE	EFFECT	IMPACT	GENE	GENEID	FEATURE	FEATUREID	BIOTYPE	RANK	HGVS_C	HGVS_P
chr1	61613	C	T	PASS	T	intergenic_region	MODIFIER	CHR_START-ENPP1	CHR_START-ENPP1	intergenic_region	CHR_START-ENPP1_3		-1	n.61613C>T
chr1	112986	G	GAATCTAATCA	QD2	GAATCTAATCA	intergenic_region	MODIFIER	CHR_START-ENPP1	CHR_START-ENPP1	intergenic_region	CHR_START-ENPP1_3		-1	n.112986_112987insAATCTAATCA
chr1	2278780	CCA	C	PASS	C	intron_variant	MODIFIER	LOC111092046	LOC111092046	transcript	XR_005352984.1	pseudogene	2	n.644-23_644-22delCA
chr1	2278780	CCA	C	PASS	C	intron_variant	MODIFIER	LOC111092046	LOC111092046	transcript	XR_005352985.1	pseudogene	1	n.568-23_568-22delCA
chr1	2278780	CCA	C	PASS	C	intron_variant	MODIFIER	LOC111092046	LOC111092046	transcript	XR_005352986.1	pseudogene	2	n.500-23_500-22delCA
chr1	3198718	TAA	T	PASS	T	upstream_gene_variant	MODIFIER	LOC111090565	LOC111090565	transcript	XR_005352994.1	pseudogene	-1	n.-3843_-3842delTT
chr1	3198718	TAA	T	PASS	T	intergenic_region	MODIFIER	LOC111090565-ZNF516	LOC111090565-ZNF516	intergenic_region	LOC111090565_3-ZNF516_3		-1	n.3198719_3198720delAA
chr1	4392449	C	T	PASS	T	downstream_gene_variant	MODIFIER	ZNF407	ZNF407	transcript	XM_038525764.1	protein_coding	-1	c.*3769G>A
chr1	4392449	C	T	PASS	T	intergenic_region	MODIFIER	ZADH2-ZNF407	ZADH2-ZNF407	intergenic_region	ZADH2_3-ZNF407_3		-1	n.4392449C>T
chr1	11057350	G	A	PASS	A	intergenic_region	MODIFIER	LOC119870085-LOC100686966	LOC119870085-LOC100686966	intergenic_region	LOC119870085_3-LOC100686966_3		-1	n.11057350G>A
chr1	14469213	A	AGCGGGGGCGGACAGGCGG	PASS	AGCGGGGGCGGACAGGCGG	upstream_gene_variant	MODIFIER	ZCCHC2	ZCCHC2	transcript	XM_038525862.1	protein_coding	-1	c.-29_-28insCCGCCTGTCCGCCCCCGC
chr1	14469213	A	AGCGGGGGCGGACAGGCGG	PASS	AGCGGGGGCGGACAGGCGG	intergenic_region	MODIFIER	ZCCHC2-LOC119870710	ZCCHC2-LOC119870710	intergenic_region	ZCCHC2_3-LOC119870710_3		-1	n.14469213_14469214insGCGGGGGCGGACAGGCGG
chr1	14991837	G	A	PASS	A	intron_variant	MODIFIER	RNF152	RNF152	transcript	XM_038525878.1	protein_coding	1	c.-161+1159G>A
chr1	14991837	G	A	PASS	A	intron_variant	MODIFIER	RNF152	RNF152	transcript	XR_005353415.1	pseudogene	1	n.105+1159G>A
chr1	14991837	G	A	PASS	A	intron_variant	MODIFIER	RNF152	RNF152	transcript	XR_005353417.1	pseudogene	1	n.105+1159G>A
chr1	14991837	G	A	PASS	A	intron_variant	MODIFIER	RNF152	RNF152	transcript	XR_005353418.1	pseudogene	1	n.105+1159G>A
chr1	14991837	G	A	PASS	A	intron_variant	MODIFIER	RNF152	RNF152	transcript	XR_005353419.1	pseudogene	1	n.105+1159G>A
chr1	14991837	G	A	PASS	A	intron_variant	MODIFIER	RNF152	RNF152	transcript	XR_005353420.1	pseudogene	1	n.105+1159G>A
chr1	14991837	G	A	PASS	A	intron_variant	MODIFIER	RNF152	RNF152	transcript	XR_005353421.1	pseudogene	1	n.105+1159G>A
chr1	14991837	G	A	PASS	A	non_coding_transcript_exon_variant	MODIFIER	RNF152	RNF152	transcript	XR_005353416.1	pseudogene	1	n.35G>A
chr1	15130196	G	A	PASS	A	intergenic_region	MODIFIER	LOC111094787-LOC119870711	LOC111094787-LOC119870711	intergenic_region	LOC111094787_3-LOC119870711_3		-1	n.15130196G>A
chr1	15404619	T	C	PASS	C	intron_variant	MODIFIER	LOC119870715	LOC119870715	transcript	XR_005353430.1	pseudogene	1	n.70+1670T>C
chr1	16287568	G	C	PASS	C	intergenic_region	MODIFIER	MC4R-LOC119876028	MC4R-LOC119876028	intergenic_region	MC4R_3-LOC119876028		-1	n.16287568G>C
chr1	16306705	C	T	PASS	T	intergenic_region	MODIFIER	MC4R-LOC119876028	MC4R-LOC119876028	intergenic_region	MC4R_3-LOC119876028		-1	n.16306705C>T
chr1	16307048	C	T	PASS	T	intergenic_region	MODIFIER	MC4R-LOC119876028	MC4R-LOC119876028	intergenic_region	MC4R_3-LOC119876028		-1	n.16307048C>T
chr1	16372668	C	T	PASS	T	intergenic_region	MODIFIER	LOC119876028-LOC100688291	LOC119876028-LOC100688291	intergenic_region	LOC119876028-LOC100688291_3		-1	n.16372668C>T
chr1	16411160	C	T	PASS	T	intergenic_region	MODIFIER	LOC100688291-LOC119869864	LOC100688291-LOC119869864	intergenic_region	LOC100688291_3-LOC119869864_3		-1	n.16411160C>T
chr1	16453566	G	T	PASS	T	intergenic_region	MODIFIER	LOC100688291-LOC119869864	LOC100688291-LOC119869864	intergenic_region	LOC100688291_3-LOC119869864_3		-1	n.16453566G>T
chr1	16738906	C	G	PASS	G	intron_variant	MODIFIER	CCBE1	CCBE1	transcript	XM_038525879.1	protein_coding	2	c.212+52208C>G
chr1	17164771	A	G	PASS	G	downstream_gene_variant	MODIFIER	LOC610160	LOC610160	transcript	XM_038525884.1	protein_coding	-1	c.*4892T>C
chr1	17164771	A	G	PASS	G	downstream_gene_variant	MODIFIER	LOC610160	LOC610160	transcript	XM_038525885.1	protein_coding	-1	c.*5069T>C
chr1	17164771	A	G	PASS	G	intergenic_region	MODIFIER	LOC119870637-LOC610160	LOC119870637-LOC610160	intergenic_region	LOC119870637_3-LOC610160_3		-1	n.17164771A>G
chr1	17272472	G	A	PASS	A	intron_variant	MODIFIER	ZNF532	ZNF532	transcript	XM_038525887.1	protein_coding	7	c.3150+10042C>T
chr1	17272472	G	A	PASS	A	intron_variant	MODIFIER	ZNF532	ZNF532	transcript	XM_038525886.1	protein_coding	5	c.3150+10042C>T
chr1	17272472	G	A	PASS	A	intron_variant	MODIFIER	ZNF532	ZNF532	transcript	XM_038525890.1	protein_coding	4	c.2973+10042C>T
chr1	17272472	G	A	PASS	A	intron_variant	MODIFIER	ZNF532	ZNF532	transcript	XM_038525892.1	protein_coding	2	c.2395-12360C>T
chr1	17272472	G	A	PASS	A	intron_variant	MODIFIER	ZNF532	ZNF532	transcript	XM_038525894.1	protein_coding	2	c.2395-12360C>T
chr1	17272472	G	A	PASS	A	intron_variant	MODIFIER	ZNF532	ZNF532	transcript	XM_038525888.1	protein_coding	6	c.3150+10042C>T
chr1	17272472	G	A	PASS	A	intron_variant	MODIFIER	ZNF532	ZNF532	transcript	XM_038525889.1	protein_coding	7	c.3150+10042C>T
chr1	17272472	G	A	PASS	A	intron_variant	MODIFIER	ZNF532	ZNF532	transcript	XM_038525891.1	protein_coding	5	c.3150+10042C>T
chr1	17301024	C	T	PASS	T	intron_variant	MODIFIER	ZNF532	ZNF532	transcript	XM_038525887.1	protein_coding	3	c.2347-3537G>A
chr1	17301024	C	T	PASS	T	intron_variant	MODIFIER	ZNF532	ZNF532	transcript	XM_038525886.1	protein_coding	1	c.2347-3537G>A
chr1	17301024	C	T	PASS	T	intron_variant	MODIFIER	ZNF532	ZNF532	transcript	XM_038525890.1	protein_coding	1	c.2347-3537G>A
chr1	17301024	C	T	PASS	T	intron_variant	MODIFIER	ZNF532	ZNF532	transcript	XM_038525892.1	protein_coding	2	c.2394+9190G>A
chr1	17301024	C	T	PASS	T	intron_variant	MODIFIER	ZNF532	ZNF532	transcript	XM_038525894.1	protein_coding	2	c.2394+9190G>A
chr1	17301024	C	T	PASS	T	intron_variant	MODIFIER	ZNF532	ZNF532	transcript	XM_038525888.1	protein_coding	2	c.2347-3537G>A
chr1	17301024	C	T	PASS	T	intron_variant	MODIFIER	ZNF532	ZNF532	transcript	XM_038525889.1	protein_coding	3	c.2347-3537G>A
chr1	17301024	C	T	PASS	T	intron_variant	MODIFIER	ZNF532	ZNF532	transcript	XM_038525891.1	protein_coding	1	c.2347-3537G>A
chr1	17333037	C	T	PASS	T	upstream_gene_variant	MODIFIER	ZNF532	ZNF532	transcript	XM_038525892.1	protein_coding	-1	c.-4340G>A
chr1	17333037	C	T	PASS	T	upstream_gene_variant	MODIFIER	ZNF532	ZNF532	transcript	XM_038525894.1	protein_coding	-1	c.-4340G>A
chr1	17333037	C	T	PASS	T	intron_variant	MODIFIER	ZNF532	ZNF532	transcript	XM_038525887.1	protein_coding	2	c.-17-20461G>A
chr1	17333037	C	T	PASS	T	intron_variant	MODIFIER	ZNF532	ZNF532	transcript	XM_038525888.1	protein_coding	1	c.-18+1903G>A
chr1	17333037	C	T	PASS	T	intron_variant	MODIFIER	ZNF532	ZNF532	transcript	XM_038525889.1	protein_coding	2	c.-17-20461G>A
chr1	17434309	C	A	PASS	A	intergenic_region	MODIFIER	ZNF532-LOC119870718	ZNF532-LOC119870718	intergenic_region	ZNF532_3-LOC119870718_3		-1	n.17434309C>A
chr1	17434310	G	A	PASS	A	intergenic_region	MODIFIER	ZNF532-LOC119870718	ZNF532-LOC119870718	intergenic_region	ZNF532_3-LOC119870718_3		-1	n.17434310G>A
chr1	17668616	G	A	PASS	A	downstream_gene_variant	MODIFIER	ALPK2	ALPK2	transcript	XM_038525895.1	protein_coding	-1	c.*711G>A
chr1	17668616	G	A	PASS	A	downstream_gene_variant	MODIFIER	ALPK2	ALPK2	transcript	XM_038525904.1	protein_coding	-1	c.*943G>A
chr1	17668616	G	A	PASS	A	downstream_gene_variant	MODIFIER	ALPK2	ALPK2	transcript	XM_038525899.1	protein_coding	-1	c.*711G>A
chr1	17668616	G	A	PASS	A	downstream_gene_variant	MODIFIER	ALPK2	ALPK2	transcript	XM_038525900.1	protein_coding	-1	c.*711G>A
chr1	17668616	G	A	PASS	A	downstream_gene_variant	MODIFIER	ALPK2	ALPK2	transcript	XM_038525896.1	protein_coding	-1	c.*711G>A
chr1	17668616	G	A	PASS	A	downstream_gene_variant	MODIFIER	ALPK2	ALPK2	transcript	XM_038525897.1	protein_coding	-1	c.*711G>A
chr1	17668616	G	A	PASS	A	downstream_gene_variant	MODIFIER	ALPK2	ALPK2	transcript	XM_038525898.1	protein_coding	-1	c.*711G>A
chr1	17668616	G	A	PASS	A	downstream_gene_variant	MODIFIER	ALPK2	ALPK2	transcript	XM_038525902.1	protein_coding	-1	c.*711G>A
chr1	17668616	G	A	PASS	A	downstream_gene_variant	MODIFIER	ALPK2	ALPK2	transcript	XM_038525903.1	protein_coding	-1	c.*711G>A
chr1	17668616	G	A	PASS	A	intergenic_region	MODIFIER	ALPK2-MIR122	ALPK2-MIR122	intergenic_region	ALPK2_3-MIR122_3		-1	n.17668616G>A
chr1	17672822	C	T	PASS	T	downstream_gene_variant	MODIFIER	ALPK2	ALPK2	transcript	XM_038525895.1	protein_coding	-1	c.*4917C>T
chr1	17672822	C	T	PASS	T	downstream_gene_variant	MODIFIER	ALPK2	ALPK2	transcript	XM_038525904.1	protein_coding	-1	c.*5149C>T
chr1	17672822	C	T	PASS	T	downstream_gene_variant	MODIFIER	ALPK2	ALPK2	transcript	XM_038525899.1	protein_coding	-1	c.*4917C>T
chr1	17672822	C	T	PASS	T	downstream_gene_variant	MODIFIER	ALPK2	ALPK2	transcript	XM_038525900.1	protein_coding	-1	c.*4917C>T
chr1	17672822	C	T	PASS	T	downstream_gene_variant	MODIFIER	ALPK2	ALPK2	transcript	XM_038525896.1	protein_coding	-1	c.*4917C>T
chr1	17672822	C	T	PASS	T	downstream_gene_variant	MODIFIER	ALPK2	ALPK2	transcript	XM_038525897.1	protein_coding	-1	c.*4917C>T
chr1	17672822	C	T	PASS	T	downstream_gene_variant	MODIFIER	ALPK2	ALPK2	transcript	XM_038525898.1	protein_coding	-1	c.*4917C>T
chr1	17672822	C	T	PASS	T	downstream_gene_variant	MODIFIER	ALPK2	ALPK2	transcript	XM_038525902.1	protein_coding	-1	c.*4917C>T
chr1	17672822	C	T	PASS	T	downstream_gene_variant	MODIFIER	ALPK2	ALPK2	transcript	XM_038525903.1	protein_coding	-1	c.*4917C>T
chr1	17672822	C	T	PASS	T	intergenic_region	MODIFIER	ALPK2-MIR122	ALPK2-MIR122	intergenic_region	ALPK2_3-MIR122_3		-1	n.17672822C>T
chr1	17887669	TCAC	T	PASS	T	intron_variant	MODIFIER	NEDD4L	NEDD4L	transcript	XM_038525905.1	protein_coding	2	c.123-3114_123-3112delGTG
chr1	17887669	TCAC	T	PASS	T	intron_variant	MODIFIER	NEDD4L	NEDD4L	transcript	XM_038525908.1	protein_coding	1	c.24-3114_24-3112delGTG
chr1	17887669	TCAC	T	PASS	T	intron_variant	MODIFIER	NEDD4L	NEDD4L	transcript	XM_038525920.1	protein_coding	1	c.-241-3114_-241-3112delGTG
chr1	17887669	TCAC	T	PASS	T	intron_variant	MODIFIER	NEDD4L	NEDD4L	transcript	XM_038525912.1	protein_coding	1	c.-161-3114_-161-3112delGTG
chr1	17887669	TCAC	T	PASS	T	intron_variant	MODIFIER	NEDD4L	NEDD4L	transcript	XM_038525913.1	protein_coding	2	c.-161-3114_-161-3112delGTG
chr1	17887669	TCAC	T	PASS	T	intron_variant	MODIFIER	NEDD4L	NEDD4L	transcript	XM_038525917.1	protein_coding	2	c.-241-3114_-241-3112delGTG
chr1	17887669	TCAC	T	PASS	T	intron_variant	MODIFIER	NEDD4L	NEDD4L	transcript	XM_038525906.1	protein_coding	2	c.123-3114_123-3112delGTG
chr1	17887669	TCAC	T	PASS	T	intron_variant	MODIFIER	NEDD4L	NEDD4L	transcript	XM_038525907.1	protein_coding	2	c.123-3114_123-3112delGTG
chr1	17887669	TCAC	T	PASS	T	intron_variant	MODIFIER	NEDD4L	NEDD4L	transcript	XM_038525909.1	protein_coding	2	c.123-3114_123-3112delGTG
chr1	17887669	TCAC	T	PASS	T	intron_variant	MODIFIER	NEDD4L	NEDD4L	transcript	XM_038525911.1	protein_coding	2	c.123-3114_123-3112delGTG
chr1	17887669	TCAC	T	PASS	T	intron_variant	MODIFIER	NEDD4L	NEDD4L	transcript	XM_038525914.1	protein_coding	2	c.123-3114_123-3112delGTG
chr1	17887669	TCAC	T	PASS	T	intron_variant	MODIFIER	NEDD4L	NEDD4L	transcript	XM_038525915.1	protein_coding	2	c.123-3114_123-3112delGTG
chr1	17887669	TCAC	T	PASS	T	intron_variant	MODIFIER	NEDD4L	NEDD4L	transcript	XM_038525918.1	protein_coding	2	c.123-3114_123-3112delGTG
chr1	17887669	TCAC	T	PASS	T	intron_variant	MODIFIER	NEDD4L	NEDD4L	transcript	XM_038525919.1	protein_coding	2	c.123-3114_123-3112delGTG
chr1	17887669	TCAC	T	PASS	T	intron_variant	MODIFIER	NEDD4L	NEDD4L	transcript	XM_038525922.1	protein_coding	2	c.123-3114_123-3112delGTG
chr1	18056334	A	ACGGTC	PASS	ACGGTC	intron_variant	MODIFIER	NEDD4L	NEDD4L	transcript	XM_038525905.1	protein_coding	1	c.48+16331_48+16332insGACCG
chr1	18056334	A	ACGGTC	PASS	ACGGTC	intron_variant	MODIFIER	NEDD4L	NEDD4L	transcript	XM_038525906.1	protein_coding	1	c.48+16331_48+16332insGACCG
chr1	18056334	A	ACGGTC	PASS	ACGGTC	intron_variant	MODIFIER	NEDD4L	NEDD4L	transcript	XM_038525907.1	protein_coding	1	c.48+16331_48+16332insGACCG
chr1	18056334	A	ACGGTC	PASS	ACGGTC	intron_variant	MODIFIER	NEDD4L	NEDD4L	transcript	XM_038525909.1	protein_coding	1	c.48+16331_48+16332insGACCG
chr1	18056334	A	ACGGTC	PASS	ACGGTC	intron_variant	MODIFIER	NEDD4L	NEDD4L	transcript	XM_038525911.1	protein_coding	1	c.48+16331_48+16332insGACCG
chr1	18056334	A	ACGGTC	PASS	ACGGTC	intron_variant	MODIFIER	NEDD4L	NEDD4L	transcript	XM_038525914.1	protein_coding	1	c.48+16331_48+16332insGACCG
chr1	18056334	A	ACGGTC	PASS	ACGGTC	intron_variant	MODIFIER	NEDD4L	NEDD4L	transcript	XM_038525915.1	protein_coding	1	c.48+16331_48+16332insGACCG
chr1	18056334	A	ACGGTC	PASS	ACGGTC	intron_variant	MODIFIER	NEDD4L	NEDD4L	transcript	XM_038525918.1	protein_coding	1	c.48+16331_48+16332insGACCG
chr1	18056334	A	ACGGTC	PASS	ACGGTC	intron_variant	MODIFIER	NEDD4L	NEDD4L	transcript	XM_038525919.1	protein_coding	1	c.48+16331_48+16332insGACCG
chr1	18056334	A	ACGGTC	PASS	ACGGTC	intron_variant	MODIFIER	NEDD4L	NEDD4L	transcript	XM_038525922.1	protein_coding	1	c.48+16331_48+16332insGACCG
chr1	18065484	G	A	PASS	A	intron_variant	MODIFIER	NEDD4L	NEDD4L	transcript	XM_038525905.1	protein_coding	1	c.48+7182C>T
chr1	18065484	G	A	PASS	A	intron_variant	MODIFIER	NEDD4L	NEDD4L	transcript	XM_038525906.1	protein_coding	1	c.48+7182C>T
chr1	18065484	G	A	PASS	A	intron_variant	MODIFIER	NEDD4L	NEDD4L	transcript	XM_038525907.1	protein_coding	1	c.48+7182C>T
chr1	18065484	G	A	PASS	A	intron_variant	MODIFIER	NEDD4L	NEDD4L	transcript	XM_038525909.1	protein_coding	1	c.48+7182C>T
chr1	18065484	G	A	PASS	A	intron_variant	MODIFIER	NEDD4L	NEDD4L	transcript	XM_038525911.1	protein_coding	1	c.48+7182C>T
chr1	18065484	G	A	PASS	A	intron_variant	MODIFIER	NEDD4L	NEDD4L	transcript	XM_038525914.1	protein_coding	1	c.48+7182C>T
chr1	18065484	G	A	PASS	A	intron_variant	MODIFIER	NEDD4L	NEDD4L	transcript	XM_038525915.1	protein_coding	1	c.48+7182C>T
chr1	18065484	G	A	PASS	A	intron_variant	MODIFIER	NEDD4L	NEDD4L	transcript	XM_038525918.1	protein_coding	1	c.48+7182C>T
chr1	18065484	G	A	PASS	A	intron_variant	MODIFIER	NEDD4L	NEDD4L	transcript	XM_038525919.1	protein_coding	1	c.48+7182C>T
chr1	18065484	G	A	PASS	A	intron_variant	MODIFIER	NEDD4L	NEDD4L	transcript	XM_038525922.1	protein_coding	1	c.48+7182C>T
chr1	18778718	C	A	PASS	A	intergenic_region	MODIFIER	LOC119870722-WDR7	LOC119870722-WDR7	intergenic_region	LOC119870722_3-WDR7_3		-1	n.18778718C>A
chr1	19977759	A	C	PASS	C	upstream_gene_variant	MODIFIER	LOC102153337	LOC102153337	transcript	XR_005353038.1	pseudogene	-1	n.-3022T>G
chr1	19977759	A	C	PASS	C	intergenic_region	MODIFIER	LOC102153337-LOC119870640	LOC102153337-LOC119870640	intergenic_region	LOC102153337_3-LOC119870640_3		-1	n.19977759A>C
chr1	20505182	C	T	PASS	T	intron_variant	MODIFIER	TCF4	TCF4	transcript	NM_001003268.1_3	protein_coding	14	c.1275+8649C>T
chr1	21000551	C	T	PASS	T	intergenic_region	MODIFIER	RAB27B-LOC610632	RAB27B-LOC610632	intergenic_region	RAB27B_3-LOC610632_3		-1	n.21000551C>T
chr1	21397840	C	T	PASS	T	intron_variant	MODIFIER	MBD2	MBD2	transcript	XM_038525969.1	protein_coding	6	c.*13-935C>T
chr1	21470913	G	C	PASS	C	intergenic_region	MODIFIER	MBD2-LOC106559491	MBD2-LOC106559491	intergenic_region	MBD2_3-LOC106559491_3		-1	n.21470913G>C
chr1	21580526	C	T	PASS	T	downstream_gene_variant	MODIFIER	LOC106559491	LOC106559491	transcript	XM_038525574.1	protein_coding	-1	c.*2107C>T
chr1	21580526	C	T	PASS	T	intergenic_region	MODIFIER	LOC106559491-LOC119870641	LOC106559491-LOC119870641	intergenic_region	LOC106559491_3-LOC119870641_3		-1	n.21580526C>T
chr1	22151018	G	GT	PASS	GT	intron_variant	MODIFIER	DCC	DCC	transcript	XM_038525970.1	protein_coding	12	c.1911+35392_1911+35393insA
chr1	22151018	G	GT	PASS	GT	intron_variant	MODIFIER	DCC	DCC	transcript	XM_038525974.1	protein_coding	11	c.1455+35392_1455+35393insA
chr1	22151018	G	GT	PASS	GT	intron_variant	MODIFIER	DCC	DCC	transcript	XM_038525973.1	protein_coding	11	c.1455+35392_1455+35393insA
chr1	22151018	G	GT	PASS	GT	intron_variant	MODIFIER	DCC	DCC	transcript	XM_038525971.1	protein_coding	12	c.1911+35392_1911+35393insA
chr1	22151018	G	GT	PASS	GT	intron_variant	MODIFIER	DCC	DCC	transcript	XM_038525972.1	protein_coding	12	c.1911+35392_1911+35393insA
chr1	22447864	C	T	PASS	T	intron_variant	MODIFIER	DCC	DCC	transcript	XM_038525970.1	protein_coding	5	c.985+28793G>A
chr1	22447864	C	T	PASS	T	intron_variant	MODIFIER	DCC	DCC	transcript	XM_038525974.1	protein_coding	4	c.529+28793G>A
chr1	22447864	C	T	PASS	T	intron_variant	MODIFIER	DCC	DCC	transcript	XM_038525973.1	protein_coding	4	c.529+28793G>A
chr1	22447864	C	T	PASS	T	intron_variant	MODIFIER	DCC	DCC	transcript	XM_038525971.1	protein_coding	5	c.985+28793G>A
chr1	22447864	C	T	PASS	T	intron_variant	MODIFIER	DCC	DCC	transcript	XM_038525972.1	protein_coding	5	c.985+28793G>A
chr1	22804769	GT	G	PASS	G	intron_variant	MODIFIER	DCC	DCC	transcript	XM_038525970.1	protein_coding	1	c.91+188993delA
chr1	22804769	GT	G	PASS	G	intron_variant	MODIFIER	DCC	DCC	transcript	XM_038525971.1	protein_coding	1	c.91+188993delA
chr1	22804769	GT	G	PASS	G	intron_variant	MODIFIER	DCC	DCC	transcript	XM_038525972.1	protein_coding	1	c.91+188993delA
chr1	23012474	C	T	PASS	T	intergenic_region	MODIFIER	DCC-LOC111090624	DCC-LOC111090624	intergenic_region	DCC_3-LOC111090624_3		-1	n.23012474C>T
chr1	23062115	T	C	PASS	C	intergenic_region	MODIFIER	DCC-LOC111090624	DCC-LOC111090624	intergenic_region	DCC_3-LOC111090624_3		-1	n.23062115T>C
chr1	23067217	A	T	PASS	T	intergenic_region	MODIFIER	DCC-LOC111090624	DCC-LOC111090624	intergenic_region	DCC_3-LOC111090624_3		-1	n.23067217A>T
chr1	23215537	A	T	PASS	T	intergenic_region	MODIFIER	LOC111090624-LOC100683470	LOC111090624-LOC100683470	intergenic_region	LOC111090624_3-LOC100683470_3		-1	n.23215537A>T
chr1	23588412	C	A	PASS	A	intergenic_region	MODIFIER	LOC100683470-LOC106559494	LOC100683470-LOC106559494	intergenic_region	LOC100683470_3-LOC106559494_3		-1	n.23588412C>A
chr1	23622058	C	T	PASS	T	upstream_gene_variant	MODIFIER	LOC102154698	LOC102154698	transcript	XR_005353470.1	pseudogene	-1	n.-686G>A
chr1	23622058	C	T	PASS	T	intergenic_region	MODIFIER	LOC102154698-LOC119869847	LOC102154698-LOC119869847	intergenic_region	LOC102154698_3-LOC119869847_3		-1	n.23622058C>T
chr1	23636497	TATATATATATATATATAA	T	PASS	T	intergenic_region	MODIFIER	LOC102154698-LOC119869847	LOC102154698-LOC119869847	intergenic_region	LOC102154698_3-LOC119869847_3		-1	n.23636498_23636515delATATATATATATATATAA
chr1	23864499	G	A	PASS	A	intergenic_region	MODIFIER	LOC119870724-LOC119870726	LOC119870724-LOC119870726	intergenic_region	LOC119870724_3-LOC119870726_3		-1	n.23864499G>A
chr1	23876916	G	T	PASS	T	intergenic_region	MODIFIER	LOC119870724-LOC119870726	LOC119870724-LOC119870726	intergenic_region	LOC119870724_3-LOC119870726_3		-1	n.23876916G>T
chr1	23900573	A	G	PASS	G	intron_variant	MODIFIER	LOC119870726	LOC119870726	transcript	XR_005353473.1	pseudogene	1	n.280-4445T>C
chr1	24225791	G	A	PASS	A	intergenic_region	MODIFIER	MRO-LOC106559532	MRO-LOC106559532	intergenic_region	MRO_3-LOC106559532_3		-1	n.24225791G>A
chr1	24246491	G	C	PASS	C	intergenic_region	MODIFIER	MRO-LOC106559532	MRO-LOC106559532	intergenic_region	MRO_3-LOC106559532_3		-1	n.24246491G>C
chr1	24262007	AG	A	PASS	A	intergenic_region	MODIFIER	MRO-LOC106559532	MRO-LOC106559532	intergenic_region	MRO_3-LOC106559532_3		-1	n.24262008delG
chr1	24561989	C	A	PASS	A	intergenic_region	MODIFIER	MC5R-RNMT	MC5R-RNMT	intergenic_region	MC5R_3-RNMT_3		-1	n.24561989C>A
chr1	24696500	G	A	PASS	A	intron_variant	MODIFIER	LDLRAD4	LDLRAD4	transcript	XM_038526003.1	protein_coding	4	c.182-20380C>T
chr1	24696500	G	A	PASS	A	intron_variant	MODIFIER	LDLRAD4	LDLRAD4	transcript	XM_038526026.1	protein_coding	2	c.-51+9015C>T
chr1	24696500	G	A	PASS	A	intron_variant	MODIFIER	LDLRAD4	LDLRAD4	transcript	XM_038526027.1	protein_coding	1	c.-50-20380C>T
chr1	24696500	G	A	PASS	A	intron_variant	MODIFIER	LDLRAD4	LDLRAD4	transcript	XM_038526025.1	protein_coding	1	c.-50-20380C>T
chr1	24696500	G	A	PASS	A	intron_variant	MODIFIER	LDLRAD4	LDLRAD4	transcript	XM_038526018.1	protein_coding	2	c.152-20380C>T
chr1	24696500	G	A	PASS	A	intron_variant	MODIFIER	LDLRAD4	LDLRAD4	transcript	XM_038526023.1	protein_coding	2	c.-50-20380C>T
chr1	24696500	G	A	PASS	A	intron_variant	MODIFIER	LDLRAD4	LDLRAD4	transcript	XM_038526013.1	protein_coding	4	c.182-20380C>T
chr1	24696500	G	A	PASS	A	intron_variant	MODIFIER	LDLRAD4	LDLRAD4	transcript	XM_038526016.1	protein_coding	3	c.182-20380C>T
chr1	24696500	G	A	PASS	A	intron_variant	MODIFIER	LDLRAD4	LDLRAD4	transcript	XM_038526012.1	protein_coding	4	c.182-20380C>T
chr1	24696500	G	A	PASS	A	intron_variant	MODIFIER	LDLRAD4	LDLRAD4	transcript	XM_038526014.1	protein_coding	4	c.182-20380C>T
chr1	24696500	G	A	PASS	A	intron_variant	MODIFIER	LDLRAD4	LDLRAD4	transcript	XM_038526017.1	protein_coding	3	c.182-20380C>T
chr1	24696500	G	A	PASS	A	intron_variant	MODIFIER	LDLRAD4	LDLRAD4	transcript	XM_038526011.1	protein_coding	4	c.182-20380C>T
chr1	24696500	G	A	PASS	A	intron_variant	MODIFIER	LDLRAD4	LDLRAD4	transcript	XM_038526022.1	protein_coding	3	c.-50-20380C>T
chr1	24696500	G	A	PASS	A	intron_variant	MODIFIER	LDLRAD4	LDLRAD4	transcript	XM_038526015.1	protein_coding	3	c.182-20380C>T
chr1	24696500	G	A	PASS	A	intron_variant	MODIFIER	LDLRAD4	LDLRAD4	transcript	XM_038526008.1	protein_coding	4	c.182-20380C>T
chr1	24696500	G	A	PASS	A	intron_variant	MODIFIER	LDLRAD4	LDLRAD4	transcript	XM_038526021.1	protein_coding	3	c.-50-20380C>T
chr1	24696500	G	A	PASS	A	intron_variant	MODIFIER	LDLRAD4	LDLRAD4	transcript	XM_038526007.1	protein_coding	4	c.182-20380C>T
chr1	24696500	G	A	PASS	A	intron_variant	MODIFIER	LDLRAD4	LDLRAD4	transcript	XM_038526006.1	protein_coding	4	c.182-20380C>T
chr1	24696500	G	A	PASS	A	intron_variant	MODIFIER	LDLRAD4	LDLRAD4	transcript	XM_038526020.1	protein_coding	3	c.-50-20380C>T
chr1	24696500	G	A	PASS	A	intron_variant	MODIFIER	LDLRAD4	LDLRAD4	transcript	XM_038526005.1	protein_coding	4	c.182-20380C>T
chr1	24696500	G	A	PASS	A	intron_variant	MODIFIER	LDLRAD4	LDLRAD4	transcript	XM_038526010.1	protein_coding	5	c.182-20380C>T
chr1	24696500	G	A	PASS	A	intron_variant	MODIFIER	LDLRAD4	LDLRAD4	transcript	XM_038526009.1	protein_coding	4	c.182-20380C>T
chr1	24696500	G	A	PASS	A	intron_variant	MODIFIER	LDLRAD4	LDLRAD4	transcript	XM_038526004.1	protein_coding	5	c.182-20380C>T
chr1	24696500	G	A	PASS	A	intron_variant	MODIFIER	LDLRAD4	LDLRAD4	transcript	XM_038526019.1	protein_coding	3	c.-50-20380C>T
chr1	24696500	G	A	PASS	A	intron_variant	MODIFIER	LDLRAD4	LDLRAD4	transcript	XM_038526024.1	protein_coding	4	c.-51+9015C>T
chr1	24696500	G	A	PASS	A	intron_variant	MODIFIER	LDLRAD4	LDLRAD4	transcript	XM_038526029.1	protein_coding	4	c.182-20380C>T
chr1	24717955	A	T	PASS	T	intron_variant	MODIFIER	LDLRAD4	LDLRAD4	transcript	XM_038526003.1	protein_coding	4	c.182-41835T>A
chr1	24717955	A	T	PASS	T	intron_variant	MODIFIER	LDLRAD4	LDLRAD4	transcript	XM_038526026.1	protein_coding	1	c.-114-12377T>A
chr1	24717955	A	T	PASS	T	intron_variant	MODIFIER	LDLRAD4	LDLRAD4	transcript	XM_038526027.1	protein_coding	1	c.-51+40460T>A
chr1	24717955	A	T	PASS	T	intron_variant	MODIFIER	LDLRAD4	LDLRAD4	transcript	XM_038526025.1	protein_coding	1	c.-50-41835T>A
chr1	24717955	A	T	PASS	T	intron_variant	MODIFIER	LDLRAD4	LDLRAD4	transcript	XM_038526018.1	protein_coding	2	c.152-41835T>A
chr1	24717955	A	T	PASS	T	intron_variant	MODIFIER	LDLRAD4	LDLRAD4	transcript	XM_038526023.1	protein_coding	2	c.-50-41835T>A
chr1	24717955	A	T	PASS	T	intron_variant	MODIFIER	LDLRAD4	LDLRAD4	transcript	XM_038526013.1	protein_coding	4	c.182-41835T>A
chr1	24717955	A	T	PASS	T	intron_variant	MODIFIER	LDLRAD4	LDLRAD4	transcript	XM_038526016.1	protein_coding	3	c.182-41835T>A
chr1	24717955	A	T	PASS	T	intron_variant	MODIFIER	LDLRAD4	LDLRAD4	transcript	XM_038526012.1	protein_coding	4	c.182-41835T>A
chr1	24717955	A	T	PASS	T	intron_variant	MODIFIER	LDLRAD4	LDLRAD4	transcript	XM_038526014.1	protein_coding	4	c.182-41835T>A
chr1	24717955	A	T	PASS	T	intron_variant	MODIFIER	LDLRAD4	LDLRAD4	transcript	XM_038526017.1	protein_coding	3	c.182-41835T>A
chr1	24717955	A	T	PASS	T	intron_variant	MODIFIER	LDLRAD4	LDLRAD4	transcript	XM_038526011.1	protein_coding	4	c.182-41835T>A
chr1	24717955	A	T	PASS	T	intron_variant	MODIFIER	LDLRAD4	LDLRAD4	transcript	XM_038526022.1	protein_coding	3	c.-50-41835T>A
chr1	24717955	A	T	PASS	T	intron_variant	MODIFIER	LDLRAD4	LDLRAD4	transcript	XM_038526015.1	protein_coding	3	c.182-41835T>A
chr1	24717955	A	T	PASS	T	intron_variant	MODIFIER	LDLRAD4	LDLRAD4	transcript	XM_038526008.1	protein_coding	4	c.182-41835T>A
chr1	24717955	A	T	PASS	T	intron_variant	MODIFIER	LDLRAD4	LDLRAD4	transcript	XM_038526021.1	protein_coding	3	c.-50-41835T>A
chr1	24717955	A	T	PASS	T	intron_variant	MODIFIER	LDLRAD4	LDLRAD4	transcript	XM_038526007.1	protein_coding	4	c.182-41835T>A
chr1	24717955	A	T	PASS	T	intron_variant	MODIFIER	LDLRAD4	LDLRAD4	transcript	XM_038526006.1	protein_coding	4	c.182-41835T>A
chr1	24717955	A	T	PASS	T	intron_variant	MODIFIER	LDLRAD4	LDLRAD4	transcript	XM_038526020.1	protein_coding	3	c.-50-41835T>A
chr1	24717955	A	T	PASS	T	intron_variant	MODIFIER	LDLRAD4	LDLRAD4	transcript	XM_038526005.1	protein_coding	4	c.182-41835T>A
chr1	24717955	A	T	PASS	T	intron_variant	MODIFIER	LDLRAD4	LDLRAD4	transcript	XM_038526010.1	protein_coding	5	c.182-41835T>A
chr1	24717955	A	T	PASS	T	intron_variant	MODIFIER	LDLRAD4	LDLRAD4	transcript	XM_038526009.1	protein_coding	4	c.182-41835T>A
chr1	24717955	A	T	PASS	T	intron_variant	MODIFIER	LDLRAD4	LDLRAD4	transcript	XM_038526004.1	protein_coding	5	c.182-41835T>A
chr1	24717955	A	T	PASS	T	intron_variant	MODIFIER	LDLRAD4	LDLRAD4	transcript	XM_038526019.1	protein_coding	3	c.-50-41835T>A
chr1	24717955	A	T	PASS	T	intron_variant	MODIFIER	LDLRAD4	LDLRAD4	transcript	XM_038526024.1	protein_coding	3	c.-114-12377T>A
chr1	24717955	A	T	PASS	T	intron_variant	MODIFIER	LDLRAD4	LDLRAD4	transcript	XM_038526029.1	protein_coding	4	c.182-41835T>A
chr1	24770292	A	G	PASS	G	intron_variant	MODIFIER	LDLRAD4	LDLRAD4	transcript	XM_038526003.1	protein_coding	4	c.181+64891T>C
chr1	24770292	A	G	PASS	G	intron_variant	MODIFIER	LDLRAD4	LDLRAD4	transcript	XM_038526025.1	protein_coding	1	c.-51+64243T>C
chr1	24770292	A	G	PASS	G	intron_variant	MODIFIER	LDLRAD4	LDLRAD4	transcript	XM_038526018.1	protein_coding	2	c.151+64891T>C
chr1	24770292	A	G	PASS	G	intron_variant	MODIFIER	LDLRAD4	LDLRAD4	transcript	XM_038526023.1	protein_coding	2	c.-51+64891T>C
chr1	24770292	A	G	PASS	G	intron_variant	MODIFIER	LDLRAD4	LDLRAD4	transcript	XM_038526013.1	protein_coding	4	c.181+64891T>C
chr1	24770292	A	G	PASS	G	intron_variant	MODIFIER	LDLRAD4	LDLRAD4	transcript	XM_038526016.1	protein_coding	3	c.181+64891T>C
chr1	24770292	A	G	PASS	G	intron_variant	MODIFIER	LDLRAD4	LDLRAD4	transcript	XM_038526012.1	protein_coding	4	c.181+64891T>C
chr1	24770292	A	G	PASS	G	intron_variant	MODIFIER	LDLRAD4	LDLRAD4	transcript	XM_038526014.1	protein_coding	4	c.181+64891T>C
chr1	24770292	A	G	PASS	G	intron_variant	MODIFIER	LDLRAD4	LDLRAD4	transcript	XM_038526017.1	protein_coding	3	c.181+64891T>C
chr1	24770292	A	G	PASS	G	intron_variant	MODIFIER	LDLRAD4	LDLRAD4	transcript	XM_038526011.1	protein_coding	4	c.181+64891T>C
chr1	24770292	A	G	PASS	G	intron_variant	MODIFIER	LDLRAD4	LDLRAD4	transcript	XM_038526022.1	protein_coding	3	c.-51+64891T>C
chr1	24770292	A	G	PASS	G	intron_variant	MODIFIER	LDLRAD4	LDLRAD4	transcript	XM_038526015.1	protein_coding	3	c.181+64891T>C
chr1	24770292	A	G	PASS	G	intron_variant	MODIFIER	LDLRAD4	LDLRAD4	transcript	XM_038526008.1	protein_coding	4	c.181+64891T>C
chr1	24770292	A	G	PASS	G	intron_variant	MODIFIER	LDLRAD4	LDLRAD4	transcript	XM_038526021.1	protein_coding	3	c.-51+64891T>C
chr1	24770292	A	G	PASS	G	intron_variant	MODIFIER	LDLRAD4	LDLRAD4	transcript	XM_038526007.1	protein_coding	4	c.181+64891T>C
chr1	24770292	A	G	PASS	G	intron_variant	MODIFIER	LDLRAD4	LDLRAD4	transcript	XM_038526006.1	protein_coding	4	c.181+64891T>C
chr1	24770292	A	G	PASS	G	intron_variant	MODIFIER	LDLRAD4	LDLRAD4	transcript	XM_038526020.1	protein_coding	3	c.-51+64891T>C
chr1	24770292	A	G	PASS	G	intron_variant	MODIFIER	LDLRAD4	LDLRAD4	transcript	XM_038526005.1	protein_coding	4	c.181+64891T>C
chr1	24770292	A	G	PASS	G	intron_variant	MODIFIER	LDLRAD4	LDLRAD4	transcript	XM_038526010.1	protein_coding	5	c.181+64891T>C
chr1	24770292	A	G	PASS	G	intron_variant	MODIFIER	LDLRAD4	LDLRAD4	transcript	XM_038526009.1	protein_coding	4	c.181+64891T>C
chr1	24770292	A	G	PASS	G	intron_variant	MODIFIER	LDLRAD4	LDLRAD4	transcript	XM_038526004.1	protein_coding	5	c.181+64891T>C
chr1	24770292	A	G	PASS	G	intron_variant	MODIFIER	LDLRAD4	LDLRAD4	transcript	XM_038526019.1	protein_coding	3	c.-51+64891T>C
chr1	24770292	A	G	PASS	G	intron_variant	MODIFIER	LDLRAD4	LDLRAD4	transcript	XM_038526024.1	protein_coding	3	c.-114-64714T>C
chr1	24770292	A	G	PASS	G	intron_variant	MODIFIER	LDLRAD4	LDLRAD4	transcript	XM_038526029.1	protein_coding	4	c.181+64891T>C
chr1	24791647	A	AC	PASS	AC	intron_variant	MODIFIER	LDLRAD4	LDLRAD4	transcript	XM_038526003.1	protein_coding	4	c.181+43535_181+43536insG
chr1	24791647	A	AC	PASS	AC	intron_variant	MODIFIER	LDLRAD4	LDLRAD4	transcript	XM_038526025.1	protein_coding	1	c.-51+42887_-51+42888insG
chr1	24791647	A	AC	PASS	AC	intron_variant	MODIFIER	LDLRAD4	LDLRAD4	transcript	XM_038526018.1	protein_coding	2	c.151+43535_151+43536insG
chr1	24791647	A	AC	PASS	AC	intron_variant	MODIFIER	LDLRAD4	LDLRAD4	transcript	XM_038526023.1	protein_coding	2	c.-51+43535_-51+43536insG
chr1	24791647	A	AC	PASS	AC	intron_variant	MODIFIER	LDLRAD4	LDLRAD4	transcript	XM_038526013.1	protein_coding	4	c.181+43535_181+43536insG
chr1	24791647	A	AC	PASS	AC	intron_variant	MODIFIER	LDLRAD4	LDLRAD4	transcript	XM_038526016.1	protein_coding	3	c.181+43535_181+43536insG
chr1	24791647	A	AC	PASS	AC	intron_variant	MODIFIER	LDLRAD4	LDLRAD4	transcript	XM_038526012.1	protein_coding	4	c.181+43535_181+43536insG
chr1	24791647	A	AC	PASS	AC	intron_variant	MODIFIER	LDLRAD4	LDLRAD4	transcript	XM_038526014.1	protein_coding	4	c.181+43535_181+43536insG
chr1	24791647	A	AC	PASS	AC	intron_variant	MODIFIER	LDLRAD4	LDLRAD4	transcript	XM_038526017.1	protein_coding	3	c.181+43535_181+43536insG
chr1	24791647	A	AC	PASS	AC	intron_variant	MODIFIER	LDLRAD4	LDLRAD4	transcript	XM_038526011.1	protein_coding	4	c.181+43535_181+43536insG
chr1	24791647	A	AC	PASS	AC	intron_variant	MODIFIER	LDLRAD4	LDLRAD4	transcript	XM_038526022.1	protein_coding	3	c.-51+43535_-51+43536insG
chr1	24791647	A	AC	PASS	AC	intron_variant	MODIFIER	LDLRAD4	LDLRAD4	transcript	XM_038526015.1	protein_coding	3	c.181+43535_181+43536insG
chr1	24791647	A	AC	PASS	AC	intron_variant	MODIFIER	LDLRAD4	LDLRAD4	transcript	XM_038526008.1	protein_coding	4	c.181+43535_181+43536insG
chr1	24791647	A	AC	PASS	AC	intron_variant	MODIFIER	LDLRAD4	LDLRAD4	transcript	XM_038526021.1	protein_coding	3	c.-51+43535_-51+43536insG
chr1	24791647	A	AC	PASS	AC	intron_variant	MODIFIER	LDLRAD4	LDLRAD4	transcript	XM_038526007.1	protein_coding	4	c.181+43535_181+43536insG
chr1	24791647	A	AC	PASS	AC	intron_variant	MODIFIER	LDLRAD4	LDLRAD4	transcript	XM_038526006.1	protein_coding	4	c.181+43535_181+43536insG
chr1	24791647	A	AC	PASS	AC	intron_variant	MODIFIER	LDLRAD4	LDLRAD4	transcript	XM_038526020.1	protein_coding	3	c.-51+43535_-51+43536insG
chr1	24791647	A	AC	PASS	AC	intron_variant	MODIFIER	LDLRAD4	LDLRAD4	transcript	XM_038526005.1	protein_coding	4	c.181+43535_181+43536insG
chr1	24791647	A	AC	PASS	AC	intron_variant	MODIFIER	LDLRAD4	LDLRAD4	transcript	XM_038526010.1	protein_coding	5	c.181+43535_181+43536insG
chr1	24791647	A	AC	PASS	AC	intron_variant	MODIFIER	LDLRAD4	LDLRAD4	transcript	XM_038526009.1	protein_coding	4	c.181+43535_181+43536insG
chr1	24791647	A	AC	PASS	AC	intron_variant	MODIFIER	LDLRAD4	LDLRAD4	transcript	XM_038526004.1	protein_coding	5	c.181+43535_181+43536insG
chr1	24791647	A	AC	PASS	AC	intron_variant	MODIFIER	LDLRAD4	LDLRAD4	transcript	XM_038526019.1	protein_coding	3	c.-51+43535_-51+43536insG
chr1	24791647	A	AC	PASS	AC	intron_variant	MODIFIER	LDLRAD4	LDLRAD4	transcript	XM_038526024.1	protein_coding	3	c.-115+43535_-115+43536insG
chr1	24791647	A	AC	PASS	AC	intron_variant	MODIFIER	LDLRAD4	LDLRAD4	transcript	XM_038526029.1	protein_coding	4	c.181+43535_181+43536insG
chr1	24826192	A	T	PASS	T	intron_variant	MODIFIER	LDLRAD4	LDLRAD4	transcript	XM_038526003.1	protein_coding	4	c.181+8991T>A
chr1	24826192	A	T	PASS	T	intron_variant	MODIFIER	LDLRAD4	LDLRAD4	transcript	XM_038526025.1	protein_coding	1	c.-51+8343T>A
chr1	24826192	A	T	PASS	T	intron_variant	MODIFIER	LDLRAD4	LDLRAD4	transcript	XM_038526018.1	protein_coding	2	c.151+8991T>A
chr1	24826192	A	T	PASS	T	intron_variant	MODIFIER	LDLRAD4	LDLRAD4	transcript	XM_038526023.1	protein_coding	2	c.-51+8991T>A
chr1	24826192	A	T	PASS	T	intron_variant	MODIFIER	LDLRAD4	LDLRAD4	transcript	XM_038526013.1	protein_coding	4	c.181+8991T>A
chr1	24826192	A	T	PASS	T	intron_variant	MODIFIER	LDLRAD4	LDLRAD4	transcript	XM_038526016.1	protein_coding	3	c.181+8991T>A
chr1	24826192	A	T	PASS	T	intron_variant	MODIFIER	LDLRAD4	LDLRAD4	transcript	XM_038526012.1	protein_coding	4	c.181+8991T>A
chr1	24826192	A	T	PASS	T	intron_variant	MODIFIER	LDLRAD4	LDLRAD4	transcript	XM_038526014.1	protein_coding	4	c.181+8991T>A
chr1	24826192	A	T	PASS	T	intron_variant	MODIFIER	LDLRAD4	LDLRAD4	transcript	XM_038526017.1	protein_coding	3	c.181+8991T>A
chr1	24826192	A	T	PASS	T	intron_variant	MODIFIER	LDLRAD4	LDLRAD4	transcript	XM_038526011.1	protein_coding	4	c.181+8991T>A
chr1	24826192	A	T	PASS	T	intron_variant	MODIFIER	LDLRAD4	LDLRAD4	transcript	XM_038526022.1	protein_coding	3	c.-51+8991T>A
chr1	24826192	A	T	PASS	T	intron_variant	MODIFIER	LDLRAD4	LDLRAD4	transcript	XM_038526015.1	protein_coding	3	c.181+8991T>A
chr1	24826192	A	T	PASS	T	intron_variant	MODIFIER	LDLRAD4	LDLRAD4	transcript	XM_038526008.1	protein_coding	4	c.181+8991T>A
chr1	24826192	A	T	PASS	T	intron_variant	MODIFIER	LDLRAD4	LDLRAD4	transcript	XM_038526021.1	protein_coding	3	c.-51+8991T>A
chr1	24826192	A	T	PASS	T	intron_variant	MODIFIER	LDLRAD4	LDLRAD4	transcript	XM_038526007.1	protein_coding	4	c.181+8991T>A
chr1	24826192	A	T	PASS	T	intron_variant	MODIFIER	LDLRAD4	LDLRAD4	transcript	XM_038526006.1	protein_coding	4	c.181+8991T>A
chr1	24826192	A	T	PASS	T	intron_variant	MODIFIER	LDLRAD4	LDLRAD4	transcript	XM_038526020.1	protein_coding	3	c.-51+8991T>A
chr1	24826192	A	T	PASS	T	intron_variant	MODIFIER	LDLRAD4	LDLRAD4	transcript	XM_038526005.1	protein_coding	4	c.181+8991T>A
chr1	24826192	A	T	PASS	T	intron_variant	MODIFIER	LDLRAD4	LDLRAD4	transcript	XM_038526010.1	protein_coding	5	c.181+8991T>A
chr1	24826192	A	T	PASS	T	intron_variant	MODIFIER	LDLRAD4	LDLRAD4	transcript	XM_038526009.1	protein_coding	4	c.181+8991T>A
chr1	24826192	A	T	PASS	T	intron_variant	MODIFIER	LDLRAD4	LDLRAD4	transcript	XM_038526004.1	protein_coding	5	c.181+8991T>A
chr1	24826192	A	T	PASS	T	intron_variant	MODIFIER	LDLRAD4	LDLRAD4	transcript	XM_038526019.1	protein_coding	3	c.-51+8991T>A
chr1	24826192	A	T	PASS	T	intron_variant	MODIFIER	LDLRAD4	LDLRAD4	transcript	XM_038526024.1	protein_coding	3	c.-115+8991T>A
chr1	24826192	A	T	PASS	T	intron_variant	MODIFIER	LDLRAD4	LDLRAD4	transcript	XM_038526029.1	protein_coding	4	c.181+8991T>A
chr1	24995937	TCC	T	PASS	T	intron_variant	MODIFIER	LDLRAD4	LDLRAD4	transcript	XM_038526003.1	protein_coding	2	c.-428+2451_-428+2452delGG
chr1	24995937	TCC	T	PASS	T	intron_variant	MODIFIER	LDLRAD4	LDLRAD4	transcript	XM_038526008.1	protein_coding	2	c.-428+2451_-428+2452delGG
chr1	24995937	TCC	T	PASS	T	intron_variant	MODIFIER	LDLRAD4	LDLRAD4	transcript	XM_038526021.1	protein_coding	2	c.-192+2451_-192+2452delGG
chr1	24995937	TCC	T	PASS	T	intron_variant	MODIFIER	LDLRAD4	LDLRAD4	transcript	XM_038526007.1	protein_coding	2	c.-428+2451_-428+2452delGG
chr1	24995937	TCC	T	PASS	T	intron_variant	MODIFIER	LDLRAD4	LDLRAD4	transcript	XM_038526006.1	protein_coding	2	c.-428+2451_-428+2452delGG
chr1	24995937	TCC	T	PASS	T	intron_variant	MODIFIER	LDLRAD4	LDLRAD4	transcript	XM_038526020.1	protein_coding	2	c.-192+2451_-192+2452delGG
chr1	24995937	TCC	T	PASS	T	intron_variant	MODIFIER	LDLRAD4	LDLRAD4	transcript	XM_038526005.1	protein_coding	2	c.-428+2451_-428+2452delGG
chr1	24995937	TCC	T	PASS	T	intron_variant	MODIFIER	LDLRAD4	LDLRAD4	transcript	XM_038526010.1	protein_coding	2	c.-505+2451_-505+2452delGG
chr1	24995937	TCC	T	PASS	T	intron_variant	MODIFIER	LDLRAD4	LDLRAD4	transcript	XM_038526009.1	protein_coding	2	c.-428+2451_-428+2452delGG
chr1	24995937	TCC	T	PASS	T	intron_variant	MODIFIER	LDLRAD4	LDLRAD4	transcript	XM_038526004.1	protein_coding	2	c.-505+2451_-505+2452delGG
chr1	24995937	TCC	T	PASS	T	intron_variant	MODIFIER	LDLRAD4	LDLRAD4	transcript	XM_038526019.1	protein_coding	2	c.-192+2451_-192+2452delGG
chr1	24995937	TCC	T	PASS	T	intron_variant	MODIFIER	LDLRAD4	LDLRAD4	transcript	XM_038526024.1	protein_coding	2	c.-256+2451_-256+2452delGG
chr1	24995937	TCC	T	PASS	T	intron_variant	MODIFIER	LDLRAD4	LDLRAD4	transcript	XM_038526029.1	protein_coding	2	c.-428+2451_-428+2452delGG
chr1	25159160	G	A	PASS	A	intergenic_region	MODIFIER	CCN2-LOC119870729	CCN2-LOC119870729	intergenic_region	CCN2_3-LOC119870729_3		-1	n.25159160G>A
chr1	25214771	G	A	PASS	A	upstream_gene_variant	MODIFIER	LOC119870729	LOC119870729	transcript	XR_005353497.1	pseudogene	-1	n.-3404G>A
chr1	25214771	G	A	PASS	A	intergenic_region	MODIFIER	CCN2-LOC119870729	CCN2-LOC119870729	intergenic_region	CCN2_3-LOC119870729_3		-1	n.25214771G>A
chr1	25234544	C	T	PASS	T	intron_variant	MODIFIER	LOC119870729	LOC119870729	transcript	XR_005353497.1	pseudogene	1	n.84-14623C>T
chr1	25269336	G	A	PASS	A	intergenic_region	MODIFIER	LOC119870729-LOC102156553	LOC119870729-LOC102156553	intergenic_region	LOC119870729_3-LOC102156553_3		-1	n.25269336G>A
chr1	25305170	T	C	PASS	C	intron_variant	MODIFIER	LOC102156553	LOC102156553	transcript	XR_005353487.1	pseudogene	10	n.1794+3058A>G
chr1	25305170	T	C	PASS	C	intron_variant	MODIFIER	LOC102156553	LOC102156553	transcript	XR_005353479.1	pseudogene	10	n.1624+3058A>G
chr1	25305170	T	C	PASS	C	intron_variant	MODIFIER	LOC102156553	LOC102156553	transcript	XR_005353480.1	pseudogene	9	n.1454-3638A>G
chr1	25305170	T	C	PASS	C	intron_variant	MODIFIER	LOC102156553	LOC102156553	transcript	XR_005353481.1	pseudogene	10	n.1595+3058A>G
chr1	25305170	T	C	PASS	C	intron_variant	MODIFIER	LOC102156553	LOC102156553	transcript	XR_005353482.1	pseudogene	9	n.1525+3058A>G
chr1	25305170	T	C	PASS	C	intron_variant	MODIFIER	LOC102156553	LOC102156553	transcript	XR_005353484.1	pseudogene	9	n.1425-3638A>G
chr1	25305170	T	C	PASS	C	intron_variant	MODIFIER	LOC102156553	LOC102156553	transcript	XR_005353491.1	pseudogene	11	n.1697+3058A>G
chr1	25305170	T	C	PASS	C	intron_variant	MODIFIER	LOC102156553	LOC102156553	transcript	XR_005353492.1	pseudogene	12	n.1735+3058A>G
chr1	25305170	T	C	PASS	C	intron_variant	MODIFIER	LOC102156553	LOC102156553	transcript	XR_005353493.1	pseudogene	11	n.1662+3058A>G
chr1	25305170	T	C	PASS	C	intron_variant	MODIFIER	LOC102156553	LOC102156553	transcript	XR_005353494.1	pseudogene	9	n.1397+3058A>G
chr1	25305170	T	C	PASS	C	intron_variant	MODIFIER	LOC102156553	LOC102156553	transcript	XR_005353495.1	pseudogene	10	n.1612+3058A>G
chr1	25305170	T	C	PASS	C	intron_variant	MODIFIER	LOC102156553	LOC102156553	transcript	XR_005353483.1	pseudogene	10	n.1624-1140A>G
chr1	25305170	T	C	PASS	C	intron_variant	MODIFIER	LOC102156553	LOC102156553	transcript	XR_005353486.1	pseudogene	9	n.1451-1140A>G
chr1	25305170	T	C	PASS	C	intron_variant	MODIFIER	LOC102156553	LOC102156553	transcript	XR_005353489.1	pseudogene	9	n.1422-1140A>G
chr1	25348150	C	T	PASS	T	intron_variant	MODIFIER	LOC102156553	LOC102156553	transcript	XR_005353487.1	pseudogene	5	n.1026+169G>A
chr1	25348150	C	T	PASS	T	intron_variant	MODIFIER	LOC102156553	LOC102156553	transcript	XR_005353479.1	pseudogene	5	n.856+169G>A
chr1	25348150	C	T	PASS	T	intron_variant	MODIFIER	LOC102156553	LOC102156553	transcript	XR_005353480.1	pseudogene	5	n.856+169G>A
chr1	25348150	C	T	PASS	T	intron_variant	MODIFIER	LOC102156553	LOC102156553	transcript	XR_005353481.1	pseudogene	5	n.856+169G>A
chr1	25348150	C	T	PASS	T	intron_variant	MODIFIER	LOC102156553	LOC102156553	transcript	XR_005353482.1	pseudogene	4	n.758-7977G>A
chr1	25348150	C	T	PASS	T	intron_variant	MODIFIER	LOC102156553	LOC102156553	transcript	XR_005353484.1	pseudogene	5	n.856+169G>A
chr1	25348150	C	T	PASS	T	intron_variant	MODIFIER	LOC102156553	LOC102156553	transcript	XR_005353491.1	pseudogene	6	n.929+169G>A
chr1	25348150	C	T	PASS	T	intron_variant	MODIFIER	LOC102156553	LOC102156553	transcript	XR_005353492.1	pseudogene	7	n.967+169G>A
chr1	25348150	C	T	PASS	T	intron_variant	MODIFIER	LOC102156553	LOC102156553	transcript	XR_005353493.1	pseudogene	6	n.894+169G>A
chr1	25348150	C	T	PASS	T	intron_variant	MODIFIER	LOC102156553	LOC102156553	transcript	XR_005353494.1	pseudogene	4	n.629+169G>A
chr1	25348150	C	T	PASS	T	intron_variant	MODIFIER	LOC102156553	LOC102156553	transcript	XR_005353495.1	pseudogene	5	n.856+169G>A
chr1	25348150	C	T	PASS	T	intron_variant	MODIFIER	LOC102156553	LOC102156553	transcript	XR_005353483.1	pseudogene	5	n.855+169G>A
chr1	25348150	C	T	PASS	T	intron_variant	MODIFIER	LOC102156553	LOC102156553	transcript	XR_005353486.1	pseudogene	5	n.853+169G>A
chr1	25348150	C	T	PASS	T	intron_variant	MODIFIER	LOC102156553	LOC102156553	transcript	XR_005353489.1	pseudogene	5	n.853+169G>A
chr1	25348150	C	T	PASS	T	intron_variant	MODIFIER	LOC102156553	LOC102156553	transcript	XR_005353485.1	pseudogene	5	n.853+169G>A
chr1	25348150	C	T	PASS	T	intron_variant	MODIFIER	LOC102156553	LOC102156553	transcript	XR_005353490.1	pseudogene	5	n.853+169G>A
chr1	25348150	C	T	PASS	T	intron_variant	MODIFIER	LOC102156553	LOC102156553	transcript	XR_005353488.1	pseudogene	5	n.852+169G>A
chr1	25348170	G	T	PASS	T	intron_variant	MODIFIER	LOC102156553	LOC102156553	transcript	XR_005353487.1	pseudogene	5	n.1026+149C>A
chr1	25348170	G	T	PASS	T	intron_variant	MODIFIER	LOC102156553	LOC102156553	transcript	XR_005353479.1	pseudogene	5	n.856+149C>A
chr1	25348170	G	T	PASS	T	intron_variant	MODIFIER	LOC102156553	LOC102156553	transcript	XR_005353480.1	pseudogene	5	n.856+149C>A
chr1	25348170	G	T	PASS	T	intron_variant	MODIFIER	LOC102156553	LOC102156553	transcript	XR_005353481.1	pseudogene	5	n.856+149C>A
chr1	25348170	G	T	PASS	T	intron_variant	MODIFIER	LOC102156553	LOC102156553	transcript	XR_005353482.1	pseudogene	4	n.758-7997C>A
chr1	25348170	G	T	PASS	T	intron_variant	MODIFIER	LOC102156553	LOC102156553	transcript	XR_005353484.1	pseudogene	5	n.856+149C>A
chr1	25348170	G	T	PASS	T	intron_variant	MODIFIER	LOC102156553	LOC102156553	transcript	XR_005353491.1	pseudogene	6	n.929+149C>A
chr1	25348170	G	T	PASS	T	intron_variant	MODIFIER	LOC102156553	LOC102156553	transcript	XR_005353492.1	pseudogene	7	n.967+149C>A
chr1	25348170	G	T	PASS	T	intron_variant	MODIFIER	LOC102156553	LOC102156553	transcript	XR_005353493.1	pseudogene	6	n.894+149C>A
chr1	25348170	G	T	PASS	T	intron_variant	MODIFIER	LOC102156553	LOC102156553	transcript	XR_005353494.1	pseudogene	4	n.629+149C>A
chr1	25348170	G	T	PASS	T	intron_variant	MODIFIER	LOC102156553	LOC102156553	transcript	XR_005353495.1	pseudogene	5	n.856+149C>A
chr1	25348170	G	T	PASS	T	intron_variant	MODIFIER	LOC102156553	LOC102156553	transcript	XR_005353483.1	pseudogene	5	n.855+149C>A
chr1	25348170	G	T	PASS	T	intron_variant	MODIFIER	LOC102156553	LOC102156553	transcript	XR_005353486.1	pseudogene	5	n.853+149C>A
chr1	25348170	G	T	PASS	T	intron_variant	MODIFIER	LOC102156553	LOC102156553	transcript	XR_005353489.1	pseudogene	5	n.853+149C>A
chr1	25348170	G	T	PASS	T	intron_variant	MODIFIER	LOC102156553	LOC102156553	transcript	XR_005353485.1	pseudogene	5	n.853+149C>A
chr1	25348170	G	T	PASS	T	intron_variant	MODIFIER	LOC102156553	LOC102156553	transcript	XR_005353490.1	pseudogene	5	n.853+149C>A
chr1	25348170	G	T	PASS	T	intron_variant	MODIFIER	LOC102156553	LOC102156553	transcript	XR_005353488.1	pseudogene	5	n.852+149C>A
chr1	25412184	T	C	PASS	C	intron_variant	MODIFIER	LOC111095250	LOC111095250	transcript	XR_005353498.1	pseudogene	2	n.219-2123A>G
chr1	25412184	T	C	PASS	C	intron_variant	MODIFIER	LOC111095250	LOC111095250	transcript	XR_005353499.1	pseudogene	2	n.219-2123A>G
chr1	25533676	T	TCCCTGGGTGGCGCAGCGGCTTAGCGCCTGCCTTTGGCCTGGGGCACGATCCTGGAGACCCGGGATCGAATCCCACGTCGGGCTCCCTGTGCATGGAGCCTGCTTCTCCC	PASS	TCCCTGGGTGGCGCAGCGGCTTAGCGCCTGCCTTTGGCCTGGGGCACGATCCTGGAGACCCGGGATCGAATCCCACGTCGGGCTCCCTGTGCATGGAGCCTGCTTCTCCC	upstream_gene_variant	MODIFIER	LOC491231	LOC491231	transcript	XM_038525475.1	protein_coding	-1	c.-4201_-4200insGGGAGAAGCAGGCTCCATGCACAGGGAGCCCGACGTGGGATTCGATCCCGGGTCTCCAGGATCGTGCCCCAGGCCAAAGGCAGGCGCTAAGCCGCTGCGCCACCCAGGG
chr1	25533676	T	TCCCTGGGTGGCGCAGCGGCTTAGCGCCTGCCTTTGGCCTGGGGCACGATCCTGGAGACCCGGGATCGAATCCCACGTCGGGCTCCCTGTGCATGGAGCCTGCTTCTCCC	PASS	TCCCTGGGTGGCGCAGCGGCTTAGCGCCTGCCTTTGGCCTGGGGCACGATCCTGGAGACCCGGGATCGAATCCCACGTCGGGCTCCCTGTGCATGGAGCCTGCTTCTCCC	upstream_gene_variant	MODIFIER	LOC100684412	LOC100684412	transcript	XM_038525476.1	protein_coding	-1	c.-2585_-2584insGGGAGAAGCAGGCTCCATGCACAGGGAGCCCGACGTGGGATTCGATCCCGGGTCTCCAGGATCGTGCCCCAGGCCAAAGGCAGGCGCTAAGCCGCTGCGCCACCCAGGG
chr1	25533676	T	TCCCTGGGTGGCGCAGCGGCTTAGCGCCTGCCTTTGGCCTGGGGCACGATCCTGGAGACCCGGGATCGAATCCCACGTCGGGCTCCCTGTGCATGGAGCCTGCTTCTCCC	PASS	TCCCTGGGTGGCGCAGCGGCTTAGCGCCTGCCTTTGGCCTGGGGCACGATCCTGGAGACCCGGGATCGAATCCCACGTCGGGCTCCCTGTGCATGGAGCCTGCTTCTCCC	downstream_gene_variant	MODIFIER	MOXD1	MOXD1	transcript	XM_038526031.1	protein_coding	-1	c.*2660_*2661insGGGAGAAGCAGGCTCCATGCACAGGGAGCCCGACGTGGGATTCGATCCCGGGTCTCCAGGATCGTGCCCCAGGCCAAAGGCAGGCGCTAAGCCGCTGCGCCACCCAGGG
chr1	25533676	T	TCCCTGGGTGGCGCAGCGGCTTAGCGCCTGCCTTTGGCCTGGGGCACGATCCTGGAGACCCGGGATCGAATCCCACGTCGGGCTCCCTGTGCATGGAGCCTGCTTCTCCC	PASS	TCCCTGGGTGGCGCAGCGGCTTAGCGCCTGCCTTTGGCCTGGGGCACGATCCTGGAGACCCGGGATCGAATCCCACGTCGGGCTCCCTGTGCATGGAGCCTGCTTCTCCC	intergenic_region	MODIFIER	LOC100684412-MOXD1	LOC100684412-MOXD1	intergenic_region	LOC100684412_3-MOXD1_3		-1	n.25533676_25533677insCCCTGGGTGGCGCAGCGGCTTAGCGCCTGCCTTTGGCCTGGGGCACGATCCTGGAGACCCGGGATCGAATCCCACGTCGGGCTCCCTGTGCATGGAGCCTGCTTCTCCC
chr1	25539130	CA	C	PASS	C	intron_variant	MODIFIER	MOXD1	MOXD1	transcript	XM_038526031.1	protein_coding	10	c.1509-2046delT
chr1	25889665	T	G	PASS	G	upstream_gene_variant	MODIFIER	LOC119869965	LOC119869965	transcript	XR_005354850.1	snRNA	-1	n.-310A>C
chr1	25889665	T	G	PASS	G	intron_variant	MODIFIER	VNN1_4	VNN1_4	transcript	NM_001003372.1_3	protein_coding	4	c.344+2030A>C
chr1	26983888	AC	A	ReadPosRankSum-2	A	intergenic_region	MODIFIER	LOC119869957-LOC119875901_2	LOC119869957-LOC119875901_2	intergenic_region	LOC119869957_3-LOC119875901_2		-1	n.26983889delC
chr1	27245116	TTA	T	PASS	T	intergenic_region	MODIFIER	SLC2A12-SGK1	SLC2A12-SGK1	intergenic_region	SLC2A12_3-SGK1_3		-1	n.27245117_27245118delTA
chr1	27560396	A	G	PASS	G	intron_variant	MODIFIER	LOC106558449	LOC106558449	transcript	XR_005353522.1	pseudogene	5	n.1146-4955T>C
chr1	27677965	G	A	PASS	A	intergenic_region	MODIFIER	LOC106558449-LOC106559542	LOC106558449-LOC106559542	intergenic_region	LOC106558449_3-LOC106559542_3		-1	n.27677965G>A
chr1	28229013	A	G	PASS	G	downstream_gene_variant	MODIFIER	MYB	MYB	transcript	XM_038526087.1	protein_coding	-1	c.*4188A>G
chr1	28229013	A	G	PASS	G	downstream_gene_variant	MODIFIER	AHI1	AHI1	transcript	XM_038526071.1	protein_coding	-1	c.*2884T>C
chr1	28229013	A	G	PASS	G	downstream_gene_variant	MODIFIER	MYB	MYB	transcript	XM_038526090.1	protein_coding	-1	c.*4188A>G
chr1	28229013	A	G	PASS	G	downstream_gene_variant	MODIFIER	AHI1	AHI1	transcript	XM_038526073.1	protein_coding	-1	c.*2884T>C
chr1	28229013	A	G	PASS	G	downstream_gene_variant	MODIFIER	AHI1	AHI1	transcript	XM_038526079.1	protein_coding	-1	c.*2884T>C
chr1	28229013	A	G	PASS	G	downstream_gene_variant	MODIFIER	AHI1	AHI1	transcript	XM_038526080.1	protein_coding	-1	c.*2884T>C
chr1	28229013	A	G	PASS	G	downstream_gene_variant	MODIFIER	AHI1	AHI1	transcript	XM_038526074.1	protein_coding	-1	c.*2884T>C
chr1	28229013	A	G	PASS	G	downstream_gene_variant	MODIFIER	AHI1	AHI1	transcript	XM_038526075.1	protein_coding	-1	c.*2884T>C
chr1	28229013	A	G	PASS	G	downstream_gene_variant	MODIFIER	AHI1	AHI1	transcript	XM_038526076.1	protein_coding	-1	c.*2884T>C
chr1	28229013	A	G	PASS	G	downstream_gene_variant	MODIFIER	AHI1	AHI1	transcript	XM_038526081.1	protein_coding	-1	c.*2884T>C
chr1	28229013	A	G	PASS	G	downstream_gene_variant	MODIFIER	AHI1	AHI1	transcript	XR_005353532.1	pseudogene	-1	n.*2023T>C
chr1	28229013	A	G	PASS	G	downstream_gene_variant	MODIFIER	AHI1	AHI1	transcript	XM_038526082.1	protein_coding	-1	c.*2884T>C
chr1	28229013	A	G	PASS	G	downstream_gene_variant	MODIFIER	AHI1	AHI1	transcript	XM_038526072.1	protein_coding	-1	c.*2884T>C
chr1	28229013	A	G	PASS	G	downstream_gene_variant	MODIFIER	AHI1	AHI1	transcript	XM_038526077.1	protein_coding	-1	c.*2884T>C
chr1	28229013	A	G	PASS	G	downstream_gene_variant	MODIFIER	AHI1	AHI1	transcript	XM_038526078.1	protein_coding	-1	c.*2884T>C
chr1	28229013	A	G	PASS	G	intron_variant	MODIFIER	AHI1	AHI1	transcript	XR_005353529.1	pseudogene	27	n.4028+2690T>C
chr1	28675322	C	T	PASS	T	intergenic_region	MODIFIER	LOC102153582-PDE7B	LOC102153582-PDE7B	intergenic_region	LOC102153582_3-PDE7B_3		-1	n.28675322C>T
chr1	29442530	T	C	PASS	C	intron_variant	MODIFIER	MAP3K5	MAP3K5	transcript	XM_038526115.1	protein_coding	7	c.1229+9691A>G
chr1	29442547	A	C	PASS	C	intron_variant	MODIFIER	MAP3K5	MAP3K5	transcript	XM_038526115.1	protein_coding	7	c.1229+9674T>G
chr1	29443236	CA	C	PASS	C	intron_variant	MODIFIER	MAP3K5	MAP3K5	transcript	XM_038526115.1	protein_coding	7	c.1229+8984delT
chr1	29484698	C	T	PASS	T	intron_variant	MODIFIER	MAP3K5	MAP3K5	transcript	XM_038526115.1	protein_coding	1	c.425-7259G>A
chr1	29492367	C	G	PASS	G	intron_variant	MODIFIER	MAP3K5	MAP3K5	transcript	XM_038526115.1	protein_coding	1	c.425-14928G>C
chr1	29513156	GACC	G	PASS	G	intron_variant	MODIFIER	MAP3K5	MAP3K5	transcript	XM_038526115.1	protein_coding	1	c.424+22771_424+22773delGGT
chr1	29528735	C	G	PASS	G	intron_variant	MODIFIER	MAP3K5	MAP3K5	transcript	XM_038526115.1	protein_coding	1	c.424+7195G>C
chr1	29948898	G	GTA	PASS	GTA	intergenic_region	MODIFIER	IFNGR1-LOC102155165	IFNGR1-LOC102155165	intergenic_region	IFNGR1_3-LOC102155165_3		-1	n.29948898_29948899insTA
chr1	29948901	A	AG	PASS	AG	intergenic_region	MODIFIER	IFNGR1-LOC102155165	IFNGR1-LOC102155165	intergenic_region	IFNGR1_3-LOC102155165_3		-1	n.29948901_29948902insG
chr1	29948903	A	AATAG	PASS	AATAG	intergenic_region	MODIFIER	IFNGR1-LOC102155165	IFNGR1-LOC102155165	intergenic_region	IFNGR1_3-LOC102155165_3		-1	n.29948903_29948904insATAG
chr1	29948904	TCTC	T	PASS	T	intergenic_region	MODIFIER	IFNGR1-LOC102155165	IFNGR1-LOC102155165	intergenic_region	IFNGR1_3-LOC102155165_3		-1	n.29948905_29948907delCTC
chr1	30494882	G	A	PASS	A	intron_variant	MODIFIER	TNFAIP3	TNFAIP3	transcript	XM_038526134.1	protein_coding	6	c.987-188G>A
chr1	30494882	G	A	PASS	A	intron_variant	MODIFIER	TNFAIP3	TNFAIP3	transcript	XM_038526135.1	protein_coding	5	c.987-188G>A
chr1	30494882	G	A	PASS	A	intron_variant	MODIFIER	TNFAIP3	TNFAIP3	transcript	XM_038526133.1	protein_coding	5	c.987-188G>A
chr1	30828538	C	T	PASS	T	intron_variant	MODIFIER	ARFGEF3	ARFGEF3	transcript	XM_038526137.1	protein_coding	13	c.2270-5445C>T
chr1	30828538	C	T	PASS	T	intron_variant	MODIFIER	ARFGEF3	ARFGEF3	transcript	XM_038526141.1	protein_coding	13	c.2270-5445C>T
chr1	30828538	C	T	PASS	T	intron_variant	MODIFIER	ARFGEF3	ARFGEF3	transcript	XM_038526138.1	protein_coding	12	c.2147-5445C>T
chr1	30828538	C	T	PASS	T	intron_variant	MODIFIER	ARFGEF3	ARFGEF3	transcript	XM_038526139.1	protein_coding	12	c.2138-5445C>T
chr1	30828538	C	T	PASS	T	intron_variant	MODIFIER	ARFGEF3	ARFGEF3	transcript	XM_038526140.1	protein_coding	11	c.2015-5445C>T
chr1	31419927	G	A	PASS	A	intron_variant	MODIFIER	REPS1	REPS1	transcript	XM_038526174.1	protein_coding	1	c.154-7374C>T
chr1	31419927	G	A	PASS	A	intron_variant	MODIFIER	REPS1	REPS1	transcript	XM_038526180.1	protein_coding	2	c.-3-7374C>T
chr1	31419927	G	A	PASS	A	intron_variant	MODIFIER	REPS1	REPS1	transcript	XM_038526178.1	protein_coding	1	c.154-7374C>T
chr1	31419927	G	A	PASS	A	intron_variant	MODIFIER	REPS1	REPS1	transcript	XM_038526175.1	protein_coding	1	c.154-7374C>T
chr1	31419927	G	A	PASS	A	intron_variant	MODIFIER	REPS1	REPS1	transcript	XM_038526176.1	protein_coding	1	c.154-7374C>T
chr1	31419927	G	A	PASS	A	intron_variant	MODIFIER	REPS1	REPS1	transcript	XM_038526177.1	protein_coding	1	c.154-7374C>T
chr1	31419927	G	A	PASS	A	intron_variant	MODIFIER	REPS1	REPS1	transcript	XM_038526179.1	protein_coding	1	c.154-7374C>T
chr1	31589548	C	G	PASS	G	upstream_gene_variant	MODIFIER	HECA	HECA	transcript	XM_038526188.1	protein_coding	-1	c.-1127C>G
chr1	31589548	C	G	PASS	G	intron_variant	MODIFIER	HECA	HECA	transcript	XM_038526185.1	protein_coding	1	c.275-4370C>G
chr1	31589548	C	G	PASS	G	intron_variant	MODIFIER	HECA	HECA	transcript	XM_038526186.1	protein_coding	1	c.275-4370C>G
chr1	31589548	C	G	PASS	G	intron_variant	MODIFIER	HECA	HECA	transcript	XR_005353589.1	pseudogene	1	n.375-4370C>G
chr1	31589548	C	G	PASS	G	intron_variant	MODIFIER	HECA	HECA	transcript	XM_038526189.1	protein_coding	1	c.86-4370C>G
chr1	31589548	C	G	PASS	G	intron_variant	MODIFIER	HECA	HECA	transcript	XM_038526187.1	protein_coding	1	c.86-4370C>G
chr1	31589548	C	G	PASS	G	intron_variant	MODIFIER	HECA	HECA	transcript	XM_038526190.1	protein_coding	1	c.86-4370C>G
chr1	32012597	A	G	PASS	G	intergenic_region	MODIFIER	LOC119870740-LOC119870654	LOC119870740-LOC119870654	intergenic_region	LOC119870740_3-LOC119870654_3		-1	n.32012597A>G
chr1	32017058	C	T	PASS	T	intergenic_region	MODIFIER	LOC119870740-LOC119870654	LOC119870740-LOC119870654	intergenic_region	LOC119870740_3-LOC119870654_3		-1	n.32017058C>T
chr1	33084301	C	T	VQSRTrancheSNP99.90to100.00	T	intergenic_region	MODIFIER	LOC100686429-LOC102157053	LOC100686429-LOC102157053	intergenic_region	LOC100686429_3-LOC102157053_3		-1	n.33084301C>T
chr1	33236555	C	T	PASS	T	intergenic_region	MODIFIER	LOC100686429-LOC102157053	LOC100686429-LOC102157053	intergenic_region	LOC100686429_3-LOC102157053_3		-1	n.33236555C>T
chr1	33264709	T	C	PASS	C	intergenic_region	MODIFIER	LOC100686429-LOC102157053	LOC100686429-LOC102157053	intergenic_region	LOC100686429_3-LOC102157053_3		-1	n.33264709T>C
chr1	33710220	C	T	PASS	T	intergenic_region	MODIFIER	LOC102157053-NMBR	LOC102157053-NMBR	intergenic_region	LOC102157053_3-NMBR_3		-1	n.33710220C>T
chr1	34382614	C	T	PASS	T	intergenic_region	MODIFIER	ADGRG6-LOC100686509	ADGRG6-LOC100686509	intergenic_region	ADGRG6_3-LOC100686509_3		-1	n.34382614C>T
chr1	34497421	G	C	PASS	C	intergenic_region	MODIFIER	ADGRG6-LOC100686509	ADGRG6-LOC100686509	intergenic_region	ADGRG6_3-LOC100686509_3		-1	n.34497421G>C
chr1	34834389	G	A	PASS	A	intron_variant	MODIFIER	LOC111090656	LOC111090656	transcript	XR_005353067.1	pseudogene	2	n.301+56G>A
chr1	35329648	T	TAAAAAATAAAAAAAAAAAAAAAAAAAAAAAAAAAAAAAATAGTTGCATGC	ReadPosRankSum-2	TAAAAAATAAAAAAAAAAAAAAAAAAAAAAAAAAAAAAAATAGTTGCATGC	intergenic_region	MODIFIER	LOC102151921-LOC111095548	LOC102151921-LOC111095548	intergenic_region	LOC102151921_3-LOC111095548_3		-1	n.35329648_35329649insAAAAAATAAAAAAAAAAAAAAAAAAAAAAAAAAAAAAAATAGTTGCATGC
chr1	35329650	C	CTTA	PASS	CTTA	intergenic_region	MODIFIER	LOC102151921-LOC111095548	LOC102151921-LOC111095548	intergenic_region	LOC102151921_3-LOC111095548_3		-1	n.35329650_35329651insTTA
chr1	35330246	A	AATTTTTATTTATTTATGATAGTC	PASS	AATTTTTATTTATTTATGATAGTC	intergenic_region	MODIFIER	LOC102151921-LOC111095548	LOC102151921-LOC111095548	intergenic_region	LOC102151921_3-LOC111095548_3		-1	n.35330246_35330247insATTTTTATTTATTTATGATAGTC
chr1	36324148	T	A	PASS	A	intron_variant	MODIFIER	UTRN	UTRN	transcript	NM_001012395.1_3	protein_coding	52	c.7809+712T>A
chr1	36355048	C	T	PASS	T	intron_variant	MODIFIER	UTRN	UTRN	transcript	NM_001012395.1_3	protein_coding	53	c.7939+4012C>T
chr1	36371545	AC	A	PASS	A	intron_variant	MODIFIER	UTRN	UTRN	transcript	NM_001012395.1_3	protein_coding	55	c.8355+474delC
chr1	36419166	G	T	PASS	T	intron_variant	MODIFIER	UTRN	UTRN	transcript	NM_001012395.1_3	protein_coding	64	c.9357+6270G>T
chr1	36500108	G	A	PASS	A	intergenic_region	MODIFIER	UTRN-LOC119870747	UTRN-LOC119870747	intergenic_region	UTRN_3-LOC119870747_3		-1	n.36500108G>A
chr1	36535981	C	T	PASS	T	upstream_gene_variant	MODIFIER	LOC119870747	LOC119870747	transcript	XR_005353627.1	pseudogene	-1	n.-4086C>T
chr1	36535981	C	T	PASS	T	upstream_gene_variant	MODIFIER	LOC119870747	LOC119870747	transcript	XR_005353629.1	pseudogene	-1	n.-4086C>T
chr1	36535981	C	T	PASS	T	intron_variant	MODIFIER	LOC119870747	LOC119870747	transcript	XR_005353624.1	pseudogene	1	n.276+8501C>T
chr1	36535981	C	T	PASS	T	intron_variant	MODIFIER	LOC119870747	LOC119870747	transcript	XR_005353621.1	pseudogene	1	n.276+8501C>T
chr1	36535981	C	T	PASS	T	intron_variant	MODIFIER	LOC119870747	LOC119870747	transcript	XR_005353623.1	pseudogene	1	n.276+8501C>T
chr1	36535981	C	T	PASS	T	intron_variant	MODIFIER	LOC119870747	LOC119870747	transcript	XR_005353625.1	pseudogene	1	n.277-1648C>T
chr1	36535981	C	T	PASS	T	intron_variant	MODIFIER	LOC119870747	LOC119870747	transcript	XR_005353626.1	pseudogene	1	n.276+8501C>T
chr1	36535981	C	T	PASS	T	intron_variant	MODIFIER	LOC119870747	LOC119870747	transcript	XR_005353628.1	pseudogene	1	n.276+8501C>T
chr1	36535981	C	T	PASS	T	intron_variant	MODIFIER	LOC119870747	LOC119870747	transcript	XR_005353622.1	pseudogene	1	n.276+8501C>T
chr1	37494094	C	T	PASS	T	downstream_gene_variant	MODIFIER	LOC119875960	LOC119875960	transcript	XR_005353637.1	pseudogene	-1	n.*2931G>A
chr1	37494094	C	T	PASS	T	intron_variant	MODIFIER	GRM1	GRM1	transcript	XM_038526271.1	protein_coding	2	c.715+43301C>T
chr1	37494094	C	T	PASS	T	intron_variant	MODIFIER	GRM1	GRM1	transcript	XM_038526275.1	protein_coding	2	c.715+43301C>T
chr1	37494094	C	T	PASS	T	intron_variant	MODIFIER	GRM1	GRM1	transcript	XM_038526273.1	protein_coding	2	c.715+43301C>T
chr1	37494094	C	T	PASS	T	intron_variant	MODIFIER	GRM1	GRM1	transcript	XM_038526276.1	protein_coding	2	c.715+43301C>T
chr1	37494094	C	T	PASS	T	intron_variant	MODIFIER	GRM1	GRM1	transcript	XM_038526272.1	protein_coding	2	c.715+43301C>T
chr1	37502633	T	C	PASS	C	intron_variant	MODIFIER	GRM1	GRM1	transcript	XM_038526271.1	protein_coding	2	c.715+51840T>C
chr1	37502633	T	C	PASS	C	intron_variant	MODIFIER	LOC119875960	LOC119875960	transcript	XR_005353637.1	pseudogene	1	n.271-2756A>G
chr1	37502633	T	C	PASS	C	intron_variant	MODIFIER	GRM1	GRM1	transcript	XM_038526275.1	protein_coding	2	c.715+51840T>C
chr1	37502633	T	C	PASS	C	intron_variant	MODIFIER	GRM1	GRM1	transcript	XM_038526273.1	protein_coding	2	c.715+51840T>C
chr1	37502633	T	C	PASS	C	intron_variant	MODIFIER	GRM1	GRM1	transcript	XM_038526276.1	protein_coding	2	c.715+51840T>C
chr1	37502633	T	C	PASS	C	intron_variant	MODIFIER	GRM1	GRM1	transcript	XM_038526272.1	protein_coding	2	c.715+51840T>C
chr1	38077355	G	A	PASS	A	intron_variant	MODIFIER	ADGB	ADGB	transcript	XM_038526278.1	protein_coding	13	c.1686+1253G>A
chr1	38077355	G	A	PASS	A	intron_variant	MODIFIER	ADGB	ADGB	transcript	XM_038526279.1	protein_coding	13	c.1683+1253G>A
chr1	38077355	G	A	PASS	A	intron_variant	MODIFIER	ADGB	ADGB	transcript	XM_038526280.1	protein_coding	13	c.1686+1253G>A
chr1	38142726	G	A	PASS	A	intron_variant	MODIFIER	ADGB	ADGB	transcript	XM_038526278.1	protein_coding	29	c.3839-1599G>A
chr1	38142726	G	A	PASS	A	intron_variant	MODIFIER	ADGB	ADGB	transcript	XM_038526279.1	protein_coding	29	c.3836-1599G>A
chr1	38142726	G	A	PASS	A	intron_variant	MODIFIER	ADGB	ADGB	transcript	XM_038526280.1	protein_coding	29	c.3839-1599G>A
chr1	38177861	A	G	PASS	G	intergenic_region	MODIFIER	ADGB-LOC102154803	ADGB-LOC102154803	intergenic_region	ADGB_3-LOC102154803_3		-1	n.38177861A>G
chr1	38211402	G	A	PASS	A	intergenic_region	MODIFIER	ADGB-LOC102154803	ADGB-LOC102154803	intergenic_region	ADGB_3-LOC102154803_3		-1	n.38211402G>A
chr1	38420653	T	C	PASS	C	intron_variant	MODIFIER	LOC102154803	LOC102154803	transcript	XM_038526282.1	protein_coding	1	c.-1080-11069A>G
chr1	38420653	T	C	PASS	C	intron_variant	MODIFIER	LOC102154803	LOC102154803	transcript	XR_005353658.1	pseudogene	1	n.131-11069A>G
chr1	38420653	T	C	PASS	C	intron_variant	MODIFIER	LOC102154803	LOC102154803	transcript	XR_005353649.1	pseudogene	1	n.131-11069A>G
chr1	38420653	T	C	PASS	C	intron_variant	MODIFIER	LOC102154803	LOC102154803	transcript	XR_005353647.1	pseudogene	1	n.131-11069A>G
chr1	38420653	T	C	PASS	C	intron_variant	MODIFIER	LOC102154803	LOC102154803	transcript	XR_005353653.1	pseudogene	1	n.131-11069A>G
chr1	38420653	T	C	PASS	C	intron_variant	MODIFIER	LOC102154803	LOC102154803	transcript	XR_005353646.1	pseudogene	1	n.131-11069A>G
chr1	38420653	T	C	PASS	C	intron_variant	MODIFIER	LOC102154803	LOC102154803	transcript	XR_005353656.1	pseudogene	1	n.131-11069A>G
chr1	38420653	T	C	PASS	C	intron_variant	MODIFIER	LOC102154803	LOC102154803	transcript	XR_005353660.1	pseudogene	1	n.131-11069A>G
chr1	38420653	T	C	PASS	C	intron_variant	MODIFIER	LOC102154803	LOC102154803	transcript	XR_005353661.1	pseudogene	1	n.131-11069A>G
chr1	38420653	T	C	PASS	C	intron_variant	MODIFIER	LOC102154803	LOC102154803	transcript	XR_005353665.1	pseudogene	1	n.131-11069A>G
chr1	38420653	T	C	PASS	C	intron_variant	MODIFIER	LOC102154803	LOC102154803	transcript	XR_005353664.1	pseudogene	1	n.131-11069A>G
chr1	38420653	T	C	PASS	C	intron_variant	MODIFIER	LOC102154803	LOC102154803	transcript	XR_005353651.1	pseudogene	1	n.131-11069A>G
chr1	38420653	T	C	PASS	C	intron_variant	MODIFIER	LOC102154803	LOC102154803	transcript	XR_005353644.1	pseudogene	1	n.131-11069A>G
chr1	38420653	T	C	PASS	C	intron_variant	MODIFIER	LOC102154803	LOC102154803	transcript	XR_005353650.1	pseudogene	1	n.131-11069A>G
chr1	38420653	T	C	PASS	C	intron_variant	MODIFIER	LOC102154803	LOC102154803	transcript	XR_005353655.1	pseudogene	1	n.131-11069A>G
chr1	38420653	T	C	PASS	C	intron_variant	MODIFIER	LOC102154803	LOC102154803	transcript	XR_005353657.1	pseudogene	1	n.131-11069A>G
chr1	38420653	T	C	PASS	C	intron_variant	MODIFIER	LOC102154803	LOC102154803	transcript	XR_005353659.1	pseudogene	1	n.131-11069A>G
chr1	38420653	T	C	PASS	C	intron_variant	MODIFIER	LOC102154803	LOC102154803	transcript	XR_005353666.1	pseudogene	1	n.131-11069A>G
chr1	38420653	T	C	PASS	C	intron_variant	MODIFIER	LOC102154803	LOC102154803	transcript	XM_038526288.1	protein_coding	2	c.-1080-11069A>G
chr1	38420653	T	C	PASS	C	intron_variant	MODIFIER	LOC102154803	LOC102154803	transcript	XM_038526283.1	protein_coding	1	c.-826-11069A>G
chr1	38420653	T	C	PASS	C	intron_variant	MODIFIER	LOC102154803	LOC102154803	transcript	XM_038526284.1	protein_coding	1	c.-781-11069A>G
chr1	38420653	T	C	PASS	C	intron_variant	MODIFIER	LOC102154803	LOC102154803	transcript	XM_038526285.1	protein_coding	1	c.-895-11069A>G
chr1	38420653	T	C	PASS	C	intron_variant	MODIFIER	LOC102154803	LOC102154803	transcript	XM_038526286.1	protein_coding	1	c.-774-11069A>G
chr1	38420653	T	C	PASS	C	intron_variant	MODIFIER	LOC102154803	LOC102154803	transcript	XM_038526287.1	protein_coding	1	c.-886-11069A>G
chr1	38420653	T	C	PASS	C	intron_variant	MODIFIER	LOC102154803	LOC102154803	transcript	XM_038526289.1	protein_coding	3	c.-1080-11069A>G
chr1	38420653	T	C	PASS	C	intron_variant	MODIFIER	LOC102154803	LOC102154803	transcript	XM_038526290.1	protein_coding	2	c.-1080-11069A>G
chr1	38420653	T	C	PASS	C	intron_variant	MODIFIER	LOC102154803	LOC102154803	transcript	XM_038526291.1	protein_coding	1	c.-1080-11069A>G
chr1	38420653	T	C	PASS	C	intron_variant	MODIFIER	LOC102154803	LOC102154803	transcript	XR_005353652.1	pseudogene	1	n.131-11069A>G
chr1	38420653	T	C	PASS	C	intron_variant	MODIFIER	LOC102154803	LOC102154803	transcript	XR_005353663.1	pseudogene	1	n.131-11069A>G
chr1	38420653	T	C	PASS	C	intron_variant	MODIFIER	LOC102154803	LOC102154803	transcript	XR_005353668.1	pseudogene	1	n.131-11069A>G
chr1	38420653	T	C	PASS	C	intron_variant	MODIFIER	LOC102154803	LOC102154803	transcript	XR_005353654.1	pseudogene	1	n.131-11069A>G
chr1	38420653	T	C	PASS	C	intron_variant	MODIFIER	LOC102154803	LOC102154803	transcript	XR_005353662.1	pseudogene	1	n.131-11069A>G
chr1	38420653	T	C	PASS	C	intron_variant	MODIFIER	LOC102154803	LOC102154803	transcript	XR_005353645.1	pseudogene	1	n.131-11069A>G
chr1	38420653	T	C	PASS	C	intron_variant	MODIFIER	LOC102154803	LOC102154803	transcript	XR_005353648.1	pseudogene	1	n.131-11069A>G
chr1	38420653	T	C	PASS	C	intron_variant	MODIFIER	LOC102154803	LOC102154803	transcript	XR_005353667.1	pseudogene	1	n.131-11069A>G
chr1	38420653	T	C	PASS	C	non_coding_transcript_exon_variant	MODIFIER	LOC102154803	LOC102154803	transcript	XR_005353669.1	pseudogene	4	n.559A>G
chr1	38475526	A	G	PASS	G	intergenic_region	MODIFIER	LOC102154803-STXBP5	LOC102154803-STXBP5	intergenic_region	LOC102154803_3-STXBP5_3		-1	n.38475526A>G
chr1	38529367	C	T	PASS	T	upstream_gene_variant	MODIFIER	STXBP5	STXBP5	transcript	XM_038526294.1	protein_coding	-1	c.-317C>T
chr1	38529367	C	T	PASS	T	upstream_gene_variant	MODIFIER	STXBP5	STXBP5	transcript	XM_038526295.1	protein_coding	-1	c.-317C>T
chr1	38529367	C	T	PASS	T	upstream_gene_variant	MODIFIER	STXBP5	STXBP5	transcript	XM_038526296.1	protein_coding	-1	c.-317C>T
chr1	38529367	C	T	PASS	T	intergenic_region	MODIFIER	LOC102154803-STXBP5	LOC102154803-STXBP5	intergenic_region	LOC102154803_3-STXBP5_3		-1	n.38529367C>T
chr1	38638797	A	T	PASS	T	intron_variant	MODIFIER	STXBP5	STXBP5	transcript	XM_038526294.1	protein_coding	18	c.2083+539A>T
chr1	38638797	A	T	PASS	T	intron_variant	MODIFIER	STXBP5	STXBP5	transcript	XM_038526295.1	protein_coding	18	c.2083+539A>T
chr1	38638797	A	T	PASS	T	intron_variant	MODIFIER	STXBP5	STXBP5	transcript	XM_038526296.1	protein_coding	18	c.2083+539A>T
chr1	38671905	C	A	PASS	A	intron_variant	MODIFIER	STXBP5	STXBP5	transcript	XM_038526294.1	protein_coding	24	c.2919-443C>A
chr1	38671905	C	A	PASS	A	intron_variant	MODIFIER	STXBP5	STXBP5	transcript	XM_038526295.1	protein_coding	23	c.2871-443C>A
chr1	38671905	C	A	PASS	A	intron_variant	MODIFIER	STXBP5	STXBP5	transcript	XM_038526296.1	protein_coding	22	c.2811-443C>A
chr1	38715955	G	A	PASS	A	intergenic_region	MODIFIER	STXBP5-LOC100688424	STXBP5-LOC100688424	intergenic_region	STXBP5_3-LOC100688424_3		-1	n.38715955G>A
chr1	38752834	C	T	PASS	T	upstream_gene_variant	MODIFIER	LOC100688424	LOC100688424	transcript	XR_005353671.1	pseudogene	-1	n.-4230C>T
chr1	38752834	C	T	PASS	T	upstream_gene_variant	MODIFIER	LOC100688424	LOC100688424	transcript	XR_005353674.1	pseudogene	-1	n.-4166C>T
chr1	38752834	C	T	PASS	T	upstream_gene_variant	MODIFIER	LOC100688424	LOC100688424	transcript	XR_005353670.1	pseudogene	-1	n.-4166C>T
chr1	38752834	C	T	PASS	T	upstream_gene_variant	MODIFIER	LOC100688424	LOC100688424	transcript	XR_005353673.1	pseudogene	-1	n.-4196C>T
chr1	38752834	C	T	PASS	T	upstream_gene_variant	MODIFIER	LOC100688424	LOC100688424	transcript	XR_005353672.1	pseudogene	-1	n.-4378C>T
chr1	38752834	C	T	PASS	T	intergenic_region	MODIFIER	STXBP5-LOC100688424	STXBP5-LOC100688424	intergenic_region	STXBP5_3-LOC100688424_3		-1	n.38752834C>T
chr1	38884918	G	T	PASS	T	intergenic_region	MODIFIER	SAMD5-LOC111095675	SAMD5-LOC111095675	intergenic_region	SAMD5_3-LOC111095675_3		-1	n.38884918G>T
chr1	38919415	T	C	PASS	C	upstream_gene_variant	MODIFIER	LOC111095675	LOC111095675	transcript	XR_005353070.1	pseudogene	-1	n.-671T>C
chr1	38919415	T	C	PASS	C	intergenic_region	MODIFIER	SAMD5-LOC111095675	SAMD5-LOC111095675	intergenic_region	SAMD5_3-LOC111095675_3		-1	n.38919415T>C
chr1	39028308	A	T	PASS	T	intergenic_region	MODIFIER	LOC111095675-LOC119870750	LOC111095675-LOC119870750	intergenic_region	LOC111095675_3-LOC119870750_3		-1	n.39028308A>T
chr1	39096712	T	A	PASS	A	intergenic_region	MODIFIER	LOC111095675-LOC119870750	LOC111095675-LOC119870750	intergenic_region	LOC111095675_3-LOC119870750_3		-1	n.39096712T>A
chr1	39125181	G	A	VQSRTrancheSNP99.90to100.00	A	intergenic_region	MODIFIER	LOC111095675-LOC119870750	LOC111095675-LOC119870750	intergenic_region	LOC111095675_3-LOC119870750_3		-1	n.39125181G>A
chr1	39181880	T	C	PASS	C	intergenic_region	MODIFIER	LOC111095675-LOC119870750	LOC111095675-LOC119870750	intergenic_region	LOC111095675_3-LOC119870750_3		-1	n.39181880T>C
chr1	39205801	A	C	PASS	C	intergenic_region	MODIFIER	LOC111095675-LOC119870750	LOC111095675-LOC119870750	intergenic_region	LOC111095675_3-LOC119870750_3		-1	n.39205801A>C
chr1	39224800	C	T	PASS	T	intergenic_region	MODIFIER	LOC111095675-LOC119870750	LOC111095675-LOC119870750	intergenic_region	LOC111095675_3-LOC119870750_3		-1	n.39224800C>T
chr1	39253369	C	T	PASS	T	intergenic_region	MODIFIER	LOC119870750-SASH1	LOC119870750-SASH1	intergenic_region	LOC119870750_3-SASH1_3		-1	n.39253369C>T
chr1	39282618	A	C	PASS	C	intergenic_region	MODIFIER	LOC119870750-SASH1	LOC119870750-SASH1	intergenic_region	LOC119870750_3-SASH1_3		-1	n.39282618A>C
chr1	39292069	TG	T	PASS	T	intergenic_region	MODIFIER	LOC119870750-SASH1	LOC119870750-SASH1	intergenic_region	LOC119870750_3-SASH1_3		-1	n.39292070delG
chr1	39381196	C	A	PASS	A	intergenic_region	MODIFIER	LOC119870750-SASH1	LOC119870750-SASH1	intergenic_region	LOC119870750_3-SASH1_3		-1	n.39381196C>A
chr1	39392660	A	T	PASS	T	intergenic_region	MODIFIER	LOC119870750-SASH1	LOC119870750-SASH1	intergenic_region	LOC119870750_3-SASH1_3		-1	n.39392660A>T
chr1	39397701	G	A	PASS	A	intergenic_region	MODIFIER	LOC119870750-SASH1	LOC119870750-SASH1	intergenic_region	LOC119870750_3-SASH1_3		-1	n.39397701G>A
chr1	39408079	T	C	PASS	C	intergenic_region	MODIFIER	LOC119870750-SASH1	LOC119870750-SASH1	intergenic_region	LOC119870750_3-SASH1_3		-1	n.39408079T>C
chr1	40015778	G	GTTTTTTTTTTTTTTTTTTTATTTTTTTTATTTTTTTAATTTTTATTTATTTATGATA	ReadPosRankSum-2	GTTTTTTTTTTTTTTTTTTTATTTTTTTTATTTTTTTAATTTTTATTTATTTATGATA	intron_variant	MODIFIER	UST	UST	transcript	XM_038526303.1	protein_coding	2	c.294+11786_294+11787insTTTTTTTTTTTTTTTTTTTATTTTTTTTATTTTTTTAATTTTTATTTATTTATGATA
chr1	40015778	G	GTTTTTTTTTTTTTTTTTTTATTTTTTTTATTTTTTTAATTTTTATTTATTTATGATA	ReadPosRankSum-2	GTTTTTTTTTTTTTTTTTTTATTTTTTTTATTTTTTTAATTTTTATTTATTTATGATA	intron_variant	MODIFIER	UST	UST	transcript	XM_038526304.1	protein_coding	2	c.294+11786_294+11787insTTTTTTTTTTTTTTTTTTTATTTTTTTTATTTTTTTAATTTTTATTTATTTATGATA
chr1	42109817	T	G	PASS	G	intron_variant	MODIFIER	AKAP12	AKAP12	transcript	XM_038526325.1	protein_coding	2	c.278-3052T>G
chr1	42109817	T	G	PASS	G	intron_variant	MODIFIER	AKAP12	AKAP12	transcript	XM_038526327.1	protein_coding	1	c.26-3052T>G
chr1	42109817	T	G	PASS	G	intron_variant	MODIFIER	AKAP12	AKAP12	transcript	XM_038526326.1	protein_coding	1	c.25+2886T>G
chr1	42109818	T	G	PASS	G	intron_variant	MODIFIER	AKAP12	AKAP12	transcript	XM_038526325.1	protein_coding	2	c.278-3051T>G
chr1	42109818	T	G	PASS	G	intron_variant	MODIFIER	AKAP12	AKAP12	transcript	XM_038526327.1	protein_coding	1	c.26-3051T>G
chr1	42109818	T	G	PASS	G	intron_variant	MODIFIER	AKAP12	AKAP12	transcript	XM_038526326.1	protein_coding	1	c.25+2887T>G
chr1	43305599	G	GGAT	QD2	GGAT	intron_variant	MODIFIER	MYCT1	MYCT1	transcript	XM_038526357.1	protein_coding	1	c.185-8774_185-8773insGAT
chr1	44088226	G	C	PASS	C	intergenic_region	MODIFIER	LOC111097878-LOC119875961	LOC111097878-LOC119875961	intergenic_region	LOC111097878_3-LOC119875961		-1	n.44088226G>C
chr1	44213777	G	C	PASS	C	intergenic_region	MODIFIER	LOC111097878-LOC119875961	LOC111097878-LOC119875961	intergenic_region	LOC111097878_3-LOC119875961		-1	n.44213777G>C
chr1	46107745	C	T	PASS	T	intergenic_region	MODIFIER	LOC102153338-LOC119869961	LOC102153338-LOC119869961	intergenic_region	LOC102153338_3-LOC119869961_3		-1	n.46107745C>T
chr1	46273921	G	A	PASS	A	intergenic_region	MODIFIER	LOC102153338-LOC119869961	LOC102153338-LOC119869961	intergenic_region	LOC102153338_3-LOC119869961_3		-1	n.46273921G>A
chr1	46345643	C	A	PASS	A	intergenic_region	MODIFIER	LOC102153338-LOC119869961	LOC102153338-LOC119869961	intergenic_region	LOC102153338_3-LOC119869961_3		-1	n.46345643C>A
chr1	47164126	C	T	PASS	T	intron_variant	MODIFIER	ARID1B	ARID1B	transcript	XM_038526412.1	protein_coding	6	c.2686+2622C>T
chr1	47164126	C	T	PASS	T	intron_variant	MODIFIER	ARID1B	ARID1B	transcript	XM_038526416.1	protein_coding	6	c.2686+2622C>T
chr1	47164126	C	T	PASS	T	intron_variant	MODIFIER	ARID1B	ARID1B	transcript	XM_038526413.1	protein_coding	6	c.2686+2622C>T
chr1	47164126	C	T	PASS	T	intron_variant	MODIFIER	ARID1B	ARID1B	transcript	XM_038526414.1	protein_coding	6	c.2686+2622C>T
chr1	47164126	C	T	PASS	T	intron_variant	MODIFIER	ARID1B	ARID1B	transcript	XM_038526415.1	protein_coding	5	c.2644+2622C>T
chr1	47164126	C	T	PASS	T	intron_variant	MODIFIER	ARID1B	ARID1B	transcript	XM_038526417.1	protein_coding	6	c.2686+2622C>T
chr1	47164126	C	T	PASS	T	intron_variant	MODIFIER	ARID1B	ARID1B	transcript	XM_038526419.1	protein_coding	6	c.2686+2622C>T
chr1	47164126	C	T	PASS	T	intron_variant	MODIFIER	ARID1B	ARID1B	transcript	XM_038526420.1	protein_coding	6	c.2686+2622C>T
chr1	47164126	C	T	PASS	T	intron_variant	MODIFIER	ARID1B	ARID1B	transcript	XM_038526418.1	protein_coding	5	c.2644+2622C>T
chr1	47164126	C	T	PASS	T	intron_variant	MODIFIER	ARID1B	ARID1B	transcript	XM_038526421.1	protein_coding	5	c.2644+2622C>T
chr1	47302168	C	T	PASS	T	downstream_gene_variant	MODIFIER	LOC119870760	LOC119870760	transcript	XR_005353729.1	pseudogene	-1	n.*4981G>A
chr1	47302168	C	T	PASS	T	downstream_gene_variant	MODIFIER	LOC119870760	LOC119870760	transcript	XR_005353730.1	pseudogene	-1	n.*4981G>A
chr1	47302168	C	T	PASS	T	intergenic_region	MODIFIER	ARID1B-LOC119870760	ARID1B-LOC119870760	intergenic_region	ARID1B_3-LOC119870760_3		-1	n.47302168C>T
chr1	47608886	C	A	PASS	A	intron_variant	MODIFIER	ZDHHC14	ZDHHC14	transcript	XM_038526424.1	protein_coding	2	c.418+18136C>A
chr1	47608886	C	A	PASS	A	intron_variant	MODIFIER	ZDHHC14	ZDHHC14	transcript	XM_038526426.1	protein_coding	2	c.418+18136C>A
chr1	47608886	C	A	PASS	A	intron_variant	MODIFIER	ZDHHC14	ZDHHC14	transcript	XM_038526425.1	protein_coding	2	c.406+18148C>A
chr1	47608886	C	A	PASS	A	intron_variant	MODIFIER	ZDHHC14	ZDHHC14	transcript	XM_038526427.1	protein_coding	2	c.406+18148C>A
chr1	47608886	C	A	PASS	A	intron_variant	MODIFIER	ZDHHC14	ZDHHC14	transcript	XM_038526428.1	protein_coding	2	c.193+18136C>A
chr1	47673623	C	T	PASS	T	intron_variant	MODIFIER	ZDHHC14	ZDHHC14	transcript	XM_038526424.1	protein_coding	4	c.716-140C>T
chr1	47673623	C	T	PASS	T	intron_variant	MODIFIER	ZDHHC14	ZDHHC14	transcript	XM_038526426.1	protein_coding	4	c.716-140C>T
chr1	47673623	C	T	PASS	T	intron_variant	MODIFIER	ZDHHC14	ZDHHC14	transcript	XM_038526425.1	protein_coding	4	c.704-140C>T
chr1	47673623	C	T	PASS	T	intron_variant	MODIFIER	ZDHHC14	ZDHHC14	transcript	XM_038526427.1	protein_coding	4	c.704-140C>T
chr1	47673623	C	T	PASS	T	intron_variant	MODIFIER	ZDHHC14	ZDHHC14	transcript	XM_038526428.1	protein_coding	4	c.491-140C>T
chr1	47853412	C	T	PASS	T	intron_variant	MODIFIER	SNX9	SNX9	transcript	XM_038526430.1	protein_coding	1	c.45+12609C>T
chr1	48127023	T	C	VQSRTrancheSNP99.90to100.00	C	intron_variant	MODIFIER	SERAC1	SERAC1	transcript	XM_038526433.1	protein_coding	9	c.792+5781A>G
chr1	48127023	T	C	VQSRTrancheSNP99.90to100.00	C	intron_variant	MODIFIER	SERAC1	SERAC1	transcript	XM_038526434.1	protein_coding	8	c.738+5781A>G
chr1	48186129	G	T	PASS	T	intergenic_region	MODIFIER	LOC102154517-TULP4	LOC102154517-TULP4	intergenic_region	LOC102154517_3-TULP4_3		-1	n.48186129G>T
chr1	48891064	A	T	PASS	T	intron_variant	MODIFIER	LOC111095876	LOC111095876	transcript	XM_038526459.1	protein_coding	7	c.173-4626A>T
chr1	48891064	A	T	PASS	T	intron_variant	MODIFIER	LOC111095876	LOC111095876	transcript	XM_038526462.1	protein_coding	6	c.173-4626A>T
chr1	48891064	A	T	PASS	T	intron_variant	MODIFIER	LOC111095876	LOC111095876	transcript	XM_038526466.1	protein_coding	6	c.173-4626A>T
chr1	48891064	A	T	PASS	T	intron_variant	MODIFIER	LOC111095876	LOC111095876	transcript	XM_038526467.1	protein_coding	6	c.173-4626A>T
chr1	48891064	A	T	PASS	T	intron_variant	MODIFIER	LOC111095876	LOC111095876	transcript	XM_038526461.1	protein_coding	7	c.173-4626A>T
chr1	48891064	A	T	PASS	T	intron_variant	MODIFIER	LOC111095876	LOC111095876	transcript	XM_038526468.1	protein_coding	6	c.173-4626A>T
chr1	48891064	A	T	PASS	T	intron_variant	MODIFIER	LOC111095876	LOC111095876	transcript	XM_038526460.1	protein_coding	7	c.173-4626A>T
chr1	48891064	A	T	PASS	T	intron_variant	MODIFIER	LOC111095876	LOC111095876	transcript	XM_038526464.1	protein_coding	6	c.173-4626A>T
chr1	48891064	A	T	PASS	T	intron_variant	MODIFIER	LOC111095876	LOC111095876	transcript	XM_038526465.1	protein_coding	6	c.173-4626A>T
chr1	48891064	A	T	PASS	T	intron_variant	MODIFIER	LOC111095876	LOC111095876	transcript	XM_038526463.1	protein_coding	7	c.173-4626A>T
chr1	48891064	A	T	PASS	T	intron_variant	MODIFIER	LOC111095876	LOC111095876	transcript	XM_038526469.1	protein_coding	2	c.146-4626A>T
chr1	49314662	A	G	VQSRTrancheSNP99.90to100.00	G	downstream_gene_variant	MODIFIER	LOC119870765	LOC119870765	transcript	XR_005353757.1	pseudogene	-1	n.*3159T>C
chr1	49314662	A	G	VQSRTrancheSNP99.90to100.00	G	intergenic_region	MODIFIER	LOC119875943-LOC119870765	LOC119875943-LOC119870765	intergenic_region	LOC119875943-LOC119870765_3		-1	n.49314662A>G
chr1	49446456	C	T	PASS	T	downstream_gene_variant	MODIFIER	SOD2	SOD2	transcript	XM_038526471.1	protein_coding	-1	c.*4027G>A
chr1	49446456	C	T	PASS	T	intergenic_region	MODIFIER	LOC119870764-SOD2	LOC119870764-SOD2	intergenic_region	LOC119870764_3-SOD2_3		-1	n.49446456C>T
chr1	49480108	A	G	PASS	G	upstream_gene_variant	MODIFIER	WTAP	WTAP	transcript	XM_038526472.1	protein_coding	-1	c.-726A>G
chr1	49480108	A	G	PASS	G	upstream_gene_variant	MODIFIER	WTAP	WTAP	transcript	XM_038526476.1	protein_coding	-1	c.-427A>G
chr1	49480108	A	G	PASS	G	upstream_gene_variant	MODIFIER	WTAP	WTAP	transcript	XM_038526478.1	protein_coding	-1	c.-726A>G
chr1	49480108	A	G	PASS	G	upstream_gene_variant	MODIFIER	WTAP	WTAP	transcript	XM_038526477.1	protein_coding	-1	c.-726A>G
chr1	49480108	A	G	PASS	G	upstream_gene_variant	MODIFIER	WTAP	WTAP	transcript	XM_038526475.1	protein_coding	-1	c.-1610A>G
chr1	49480108	A	G	PASS	G	upstream_gene_variant	MODIFIER	WTAP	WTAP	transcript	XM_038526473.1	protein_coding	-1	c.-2045A>G
chr1	49480108	A	G	PASS	G	upstream_gene_variant	MODIFIER	WTAP	WTAP	transcript	XM_038526474.1	protein_coding	-1	c.-3643A>G
chr1	49480108	A	G	PASS	G	intergenic_region	MODIFIER	LOC111090685-WTAP	LOC111090685-WTAP	intergenic_region	LOC111090685_3-WTAP_3		-1	n.49480108A>G
chr1	49630927	T	G	PASS	G	intergenic_region	MODIFIER	PNLDC1-MAS1	PNLDC1-MAS1	intergenic_region	PNLDC1_3-MAS1_3		-1	n.49630927T>G
chr1	50206726	A	G	PASS	G	intron_variant	MODIFIER	MAP3K4	MAP3K4	transcript	XM_038526498.1	protein_coding	3	c.1711-8206A>G
chr1	50206726	A	G	PASS	G	intron_variant	MODIFIER	MAP3K4	MAP3K4	transcript	XM_038526504.1	protein_coding	3	c.1711-8206A>G
chr1	50206726	A	G	PASS	G	intron_variant	MODIFIER	MAP3K4	MAP3K4	transcript	XM_038526499.1	protein_coding	3	c.1711-8206A>G
chr1	50206726	A	G	PASS	G	intron_variant	MODIFIER	MAP3K4	MAP3K4	transcript	XM_038526501.1	protein_coding	3	c.1711-8206A>G
chr1	50206726	A	G	PASS	G	intron_variant	MODIFIER	MAP3K4	MAP3K4	transcript	XM_038526502.1	protein_coding	3	c.1711-8206A>G
chr1	50206726	A	G	PASS	G	intron_variant	MODIFIER	MAP3K4	MAP3K4	transcript	XM_038526500.1	protein_coding	3	c.1570-8206A>G
chr1	50206726	A	G	PASS	G	intron_variant	MODIFIER	MAP3K4	MAP3K4	transcript	XM_038526503.1	protein_coding	3	c.1435-8206A>G
chr1	50475714	C	T	PASS	T	intron_variant	MODIFIER	PRKN	PRKN	transcript	XM_038526511.1	protein_coding	10	c.1164+5274G>A
chr1	50493843	C	T	PASS	T	intron_variant	MODIFIER	PRKN	PRKN	transcript	XM_038526511.1	protein_coding	9	c.1081-12772G>A
chr1	50965112	G	A	PASS	A	intron_variant	MODIFIER	PRKN	PRKN	transcript	XM_038526511.1	protein_coding	6	c.731+49376C>T
chr1	50981336	T	C	PASS	C	intron_variant	MODIFIER	PRKN	PRKN	transcript	XM_038526511.1	protein_coding	6	c.731+33152A>G
chr1	51063645	C	T	PASS	T	intron_variant	MODIFIER	PRKN	PRKN	transcript	XM_038526511.1	protein_coding	5	c.615+38822G>A
chr1	51130697	A	G	PASS	G	intron_variant	MODIFIER	PRKN	PRKN	transcript	XM_038526511.1	protein_coding	4	c.532-28147T>C
chr1	51757637	GC	G	PASS	G	intron_variant	MODIFIER	PACRG	PACRG	transcript	XM_038526512.1	protein_coding	1	c.156+5497delC
chr1	51757637	GC	G	PASS	G	intron_variant	MODIFIER	PACRG	PACRG	transcript	XM_038526514.1	protein_coding	1	c.156+5497delC
chr1	51757637	GC	G	PASS	G	intron_variant	MODIFIER	PACRG	PACRG	transcript	XM_038526515.1	protein_coding	1	c.156+5497delC
chr1	51757637	GC	G	PASS	G	intron_variant	MODIFIER	PACRG	PACRG	transcript	XM_038526513.1	protein_coding	1	c.156+5497delC
chr1	51783360	G	T	PASS	T	intron_variant	MODIFIER	PACRG	PACRG	transcript	XM_038526512.1	protein_coding	1	c.156+31219G>T
chr1	51783360	G	T	PASS	T	intron_variant	MODIFIER	PACRG	PACRG	transcript	XM_038526514.1	protein_coding	1	c.156+31219G>T
chr1	51783360	G	T	PASS	T	intron_variant	MODIFIER	PACRG	PACRG	transcript	XM_038526515.1	protein_coding	1	c.156+31219G>T
chr1	51783360	G	T	PASS	T	intron_variant	MODIFIER	PACRG	PACRG	transcript	XM_038526513.1	protein_coding	1	c.156+31219G>T
chr1	51808039	C	T	PASS	T	intron_variant	MODIFIER	PACRG	PACRG	transcript	XM_038526512.1	protein_coding	1	c.157-24382C>T
chr1	51808039	C	T	PASS	T	intron_variant	MODIFIER	PACRG	PACRG	transcript	XM_038526514.1	protein_coding	1	c.157-24382C>T
chr1	51808039	C	T	PASS	T	intron_variant	MODIFIER	PACRG	PACRG	transcript	XM_038526515.1	protein_coding	1	c.157-24382C>T
chr1	51808039	C	T	PASS	T	intron_variant	MODIFIER	PACRG	PACRG	transcript	XM_038526513.1	protein_coding	1	c.157-24382C>T
chr1	51827011	G	T	PASS	T	intron_variant	MODIFIER	PACRG	PACRG	transcript	XM_038526512.1	protein_coding	1	c.157-5410G>T
chr1	51827011	G	T	PASS	T	intron_variant	MODIFIER	PACRG	PACRG	transcript	XM_038526514.1	protein_coding	1	c.157-5410G>T
chr1	51827011	G	T	PASS	T	intron_variant	MODIFIER	PACRG	PACRG	transcript	XM_038526515.1	protein_coding	1	c.157-5410G>T
chr1	51827011	G	T	PASS	T	intron_variant	MODIFIER	PACRG	PACRG	transcript	XM_038526513.1	protein_coding	1	c.157-5410G>T
chr1	51902112	C	T	PASS	T	intron_variant	MODIFIER	PACRG	PACRG	transcript	XM_038526512.1	protein_coding	2	c.291+69557C>T
chr1	51902112	C	T	PASS	T	intron_variant	MODIFIER	PACRG	PACRG	transcript	XM_038526514.1	protein_coding	2	c.291+69557C>T
chr1	51902112	C	T	PASS	T	intron_variant	MODIFIER	PACRG	PACRG	transcript	XM_038526515.1	protein_coding	2	c.291+69557C>T
chr1	51902112	C	T	PASS	T	intron_variant	MODIFIER	PACRG	PACRG	transcript	XM_038526513.1	protein_coding	2	c.291+69557C>T
chr1	51933246	G	GTTTGT	PASS	GTTTGT	intron_variant	MODIFIER	PACRG	PACRG	transcript	XM_038526512.1	protein_coding	2	c.291+100691_291+100692insTTTGT
chr1	51933246	G	GTTTGT	PASS	GTTTGT	intron_variant	MODIFIER	PACRG	PACRG	transcript	XM_038526514.1	protein_coding	2	c.291+100691_291+100692insTTTGT
chr1	51933246	G	GTTTGT	PASS	GTTTGT	intron_variant	MODIFIER	PACRG	PACRG	transcript	XM_038526515.1	protein_coding	2	c.291+100691_291+100692insTTTGT
chr1	51933246	G	GTTTGT	PASS	GTTTGT	intron_variant	MODIFIER	PACRG	PACRG	transcript	XM_038526513.1	protein_coding	2	c.291+100691_291+100692insTTTGT
chr1	51970480	C	T	PASS	T	intron_variant	MODIFIER	PACRG	PACRG	transcript	XM_038526512.1	protein_coding	2	c.292-68698C>T
chr1	51970480	C	T	PASS	T	intron_variant	MODIFIER	PACRG	PACRG	transcript	XM_038526514.1	protein_coding	2	c.292-68698C>T
chr1	51970480	C	T	PASS	T	intron_variant	MODIFIER	PACRG	PACRG	transcript	XM_038526515.1	protein_coding	2	c.292-68698C>T
chr1	51970480	C	T	PASS	T	intron_variant	MODIFIER	PACRG	PACRG	transcript	XM_038526513.1	protein_coding	2	c.292-68698C>T
chr1	52051603	G	A	PASS	A	intron_variant	MODIFIER	PACRG	PACRG	transcript	XM_038526512.1	protein_coding	3	c.463+12254G>A
chr1	52051603	G	A	PASS	A	intron_variant	MODIFIER	PACRG	PACRG	transcript	XM_038526514.1	protein_coding	3	c.463+12254G>A
chr1	52051603	G	A	PASS	A	intron_variant	MODIFIER	PACRG	PACRG	transcript	XM_038526515.1	protein_coding	3	c.463+12254G>A
chr1	52051603	G	A	PASS	A	intron_variant	MODIFIER	PACRG	PACRG	transcript	XM_038526513.1	protein_coding	3	c.463+12254G>A
chr1	52051652	C	CG	PASS	CG	intron_variant	MODIFIER	PACRG	PACRG	transcript	XM_038526512.1	protein_coding	3	c.463+12303_463+12304insG
chr1	52051652	C	CG	PASS	CG	intron_variant	MODIFIER	PACRG	PACRG	transcript	XM_038526514.1	protein_coding	3	c.463+12303_463+12304insG
chr1	52051652	C	CG	PASS	CG	intron_variant	MODIFIER	PACRG	PACRG	transcript	XM_038526515.1	protein_coding	3	c.463+12303_463+12304insG
chr1	52051652	C	CG	PASS	CG	intron_variant	MODIFIER	PACRG	PACRG	transcript	XM_038526513.1	protein_coding	3	c.463+12303_463+12304insG
chr1	52051669	C	A	PASS	A	intron_variant	MODIFIER	PACRG	PACRG	transcript	XM_038526512.1	protein_coding	3	c.463+12320C>A
chr1	52051669	C	A	PASS	A	intron_variant	MODIFIER	PACRG	PACRG	transcript	XM_038526514.1	protein_coding	3	c.463+12320C>A
chr1	52051669	C	A	PASS	A	intron_variant	MODIFIER	PACRG	PACRG	transcript	XM_038526515.1	protein_coding	3	c.463+12320C>A
chr1	52051669	C	A	PASS	A	intron_variant	MODIFIER	PACRG	PACRG	transcript	XM_038526513.1	protein_coding	3	c.463+12320C>A
chr1	52051675	G	T	VQSRTrancheSNP99.90to100.00	T	intron_variant	MODIFIER	PACRG	PACRG	transcript	XM_038526512.1	protein_coding	3	c.463+12326G>T
chr1	52051675	G	T	VQSRTrancheSNP99.90to100.00	T	intron_variant	MODIFIER	PACRG	PACRG	transcript	XM_038526514.1	protein_coding	3	c.463+12326G>T
chr1	52051675	G	T	VQSRTrancheSNP99.90to100.00	T	intron_variant	MODIFIER	PACRG	PACRG	transcript	XM_038526515.1	protein_coding	3	c.463+12326G>T
chr1	52051675	G	T	VQSRTrancheSNP99.90to100.00	T	intron_variant	MODIFIER	PACRG	PACRG	transcript	XM_038526513.1	protein_coding	3	c.463+12326G>T
chr1	52191793	T	C	PASS	C	intron_variant	MODIFIER	PACRG	PACRG	transcript	XM_038526512.1	protein_coding	4	c.614-74436T>C
chr1	52191793	T	C	PASS	C	intron_variant	MODIFIER	PACRG	PACRG	transcript	XM_038526514.1	protein_coding	4	c.614-74414T>C
chr1	52191793	T	C	PASS	C	intron_variant	MODIFIER	PACRG	PACRG	transcript	XM_038526513.1	protein_coding	4	c.614-80598T>C
chr1	52246397	T	A	PASS	A	intron_variant	MODIFIER	PACRG	PACRG	transcript	XM_038526512.1	protein_coding	4	c.614-19832T>A
chr1	52246397	T	A	PASS	A	intron_variant	MODIFIER	PACRG	PACRG	transcript	XM_038526514.1	protein_coding	4	c.614-19810T>A
chr1	52246397	T	A	PASS	A	intron_variant	MODIFIER	PACRG	PACRG	transcript	XM_038526513.1	protein_coding	4	c.614-25994T>A
chr1	52253969	GT	G	PASS	G	intron_variant	MODIFIER	PACRG	PACRG	transcript	XM_038526512.1	protein_coding	4	c.614-12259delT
chr1	52253969	GT	G	PASS	G	intron_variant	MODIFIER	PACRG	PACRG	transcript	XM_038526514.1	protein_coding	4	c.614-12237delT
chr1	52253969	GT	G	PASS	G	intron_variant	MODIFIER	PACRG	PACRG	transcript	XM_038526513.1	protein_coding	4	c.614-18421delT
chr1	52274575	G	A	PASS	A	downstream_gene_variant	MODIFIER	PACRG	PACRG	transcript	XM_038526512.1	protein_coding	-1	c.*2024G>A
chr1	52274575	G	A	PASS	A	downstream_gene_variant	MODIFIER	LOC111095931	LOC111095931	transcript	XR_005353779.1	pseudogene	-1	n.*1182C>T
chr1	52274575	G	A	PASS	A	downstream_gene_variant	MODIFIER	PACRG	PACRG	transcript	XM_038526514.1	protein_coding	-1	c.*2223G>A
chr1	52274575	G	A	PASS	A	downstream_gene_variant	MODIFIER	PACRG	PACRG	transcript	XM_038526513.1	protein_coding	-1	c.*2024G>A
chr1	52274575	G	A	PASS	A	intergenic_region	MODIFIER	PACRG-LOC111095931	PACRG-LOC111095931	intergenic_region	PACRG_3-LOC111095931_3		-1	n.52274575G>A
chr1	52291706	G	A	PASS	A	upstream_gene_variant	MODIFIER	LOC111095931	LOC111095931	transcript	XR_005353779.1	pseudogene	-1	n.-2428C>T
chr1	52291706	G	A	PASS	A	intergenic_region	MODIFIER	LOC111095931-LOC102151615	LOC111095931-LOC102151615	intergenic_region	LOC111095931_3-LOC102151615_3		-1	n.52291706G>A
chr1	52339282	C	T	PASS	T	intergenic_region	MODIFIER	LOC102151615-QKI	LOC102151615-QKI	intergenic_region	LOC102151615_3-QKI_3		-1	n.52339282C>T
chr1	52372352	G	A	PASS	A	intron_variant	MODIFIER	QKI	QKI	transcript	NM_001003021.2_3	protein_coding	1	c.142+15840G>A
chr1	52472770	C	A	PASS	A	intron_variant	MODIFIER	QKI	QKI	transcript	NM_001003021.2_3	protein_coding	4	c.546+1724C>A
chr1	52533580	G	A	PASS	A	intergenic_region	MODIFIER	QKI-LOC119870664	QKI-LOC119870664	intergenic_region	QKI_3-LOC119870664_3		-1	n.52533580G>A
chr1	52581518	C	T	PASS	T	intergenic_region	MODIFIER	QKI-LOC119870664	QKI-LOC119870664	intergenic_region	QKI_3-LOC119870664_3		-1	n.52581518C>T
chr1	52619038	C	T	PASS	T	intergenic_region	MODIFIER	QKI-LOC119870664	QKI-LOC119870664	intergenic_region	QKI_3-LOC119870664_3		-1	n.52619038C>T
chr1	52643695	C	T	PASS	T	intergenic_region	MODIFIER	QKI-LOC119870664	QKI-LOC119870664	intergenic_region	QKI_3-LOC119870664_3		-1	n.52643695C>T
chr1	52659702	C	T	PASS	T	intergenic_region	MODIFIER	QKI-LOC119870664	QKI-LOC119870664	intergenic_region	QKI_3-LOC119870664_3		-1	n.52659702C>T
chr1	52718496	A	G	PASS	G	intron_variant	MODIFIER	LOC119870664	LOC119870664	transcript	XR_005353092.1	pseudogene	2	n.269+148A>G
chr1	52725646	C	T	PASS	T	intergenic_region	MODIFIER	LOC119870664-LOC119870665	LOC119870664-LOC119870665	intergenic_region	LOC119870664_3-LOC119870665_3		-1	n.52725646C>T
chr1	52751723	G	A	PASS	A	intergenic_region	MODIFIER	LOC119870665-LOC111090691	LOC119870665-LOC111090691	intergenic_region	LOC119870665_3-LOC111090691_3		-1	n.52751723G>A
chr1	52769241	T	C	PASS	C	intergenic_region	MODIFIER	LOC119870665-LOC111090691	LOC119870665-LOC111090691	intergenic_region	LOC119870665_3-LOC111090691_3		-1	n.52769241T>C
chr1	52817268	T	G	PASS	G	intergenic_region	MODIFIER	LOC119870665-LOC111090691	LOC119870665-LOC111090691	intergenic_region	LOC119870665_3-LOC111090691_3		-1	n.52817268T>G
chr1	52820733	G	A	PASS	A	intergenic_region	MODIFIER	LOC119870665-LOC111090691	LOC119870665-LOC111090691	intergenic_region	LOC119870665_3-LOC111090691_3		-1	n.52820733G>A
chr1	52823525	T	C	PASS	C	intergenic_region	MODIFIER	LOC119870665-LOC111090691	LOC119870665-LOC111090691	intergenic_region	LOC119870665_3-LOC111090691_3		-1	n.52823525T>C
chr1	52826047	G	T	PASS	T	intergenic_region	MODIFIER	LOC119870665-LOC111090691	LOC119870665-LOC111090691	intergenic_region	LOC119870665_3-LOC111090691_3		-1	n.52826047G>T
chr1	52827248	G	A	PASS	A	intergenic_region	MODIFIER	LOC119870665-LOC111090691	LOC119870665-LOC111090691	intergenic_region	LOC119870665_3-LOC111090691_3		-1	n.52827248G>A
chr1	52827429	C	T	PASS	T	intergenic_region	MODIFIER	LOC119870665-LOC111090691	LOC119870665-LOC111090691	intergenic_region	LOC119870665_3-LOC111090691_3		-1	n.52827429C>T
chr1	52830801	G	T	PASS	T	intergenic_region	MODIFIER	LOC119870665-LOC111090691	LOC119870665-LOC111090691	intergenic_region	LOC119870665_3-LOC111090691_3		-1	n.52830801G>T
chr1	52852401	C	T	PASS	T	intergenic_region	MODIFIER	LOC119870665-LOC111090691	LOC119870665-LOC111090691	intergenic_region	LOC119870665_3-LOC111090691_3		-1	n.52852401C>T
chr1	52852456	C	T	PASS	T	intergenic_region	MODIFIER	LOC119870665-LOC111090691	LOC119870665-LOC111090691	intergenic_region	LOC119870665_3-LOC111090691_3		-1	n.52852456C>T
chr1	52852827	T	A	PASS	A	intergenic_region	MODIFIER	LOC119870665-LOC111090691	LOC119870665-LOC111090691	intergenic_region	LOC119870665_3-LOC111090691_3		-1	n.52852827T>A
chr1	52853708	A	G	PASS	G	intergenic_region	MODIFIER	LOC119870665-LOC111090691	LOC119870665-LOC111090691	intergenic_region	LOC119870665_3-LOC111090691_3		-1	n.52853708A>G
chr1	52856718	A	G	PASS	G	intergenic_region	MODIFIER	LOC119870665-LOC111090691	LOC119870665-LOC111090691	intergenic_region	LOC119870665_3-LOC111090691_3		-1	n.52856718A>G
chr1	52856729	GCTCA	G	PASS	G	intergenic_region	MODIFIER	LOC119870665-LOC111090691	LOC119870665-LOC111090691	intergenic_region	LOC119870665_3-LOC111090691_3		-1	n.52856730_52856733delCTCA
chr1	52857023	G	A	PASS	A	intergenic_region	MODIFIER	LOC119870665-LOC111090691	LOC119870665-LOC111090691	intergenic_region	LOC119870665_3-LOC111090691_3		-1	n.52857023G>A
chr1	52857138	T	C	PASS	C	intergenic_region	MODIFIER	LOC119870665-LOC111090691	LOC119870665-LOC111090691	intergenic_region	LOC119870665_3-LOC111090691_3		-1	n.52857138T>C
chr1	52860242	C	T	PASS	T	intergenic_region	MODIFIER	LOC119870665-LOC111090691	LOC119870665-LOC111090691	intergenic_region	LOC119870665_3-LOC111090691_3		-1	n.52860242C>T
chr1	52874737	G	A	PASS	A	intergenic_region	MODIFIER	LOC119870665-LOC111090691	LOC119870665-LOC111090691	intergenic_region	LOC119870665_3-LOC111090691_3		-1	n.52874737G>A
chr1	52875954	C	T	PASS	T	intergenic_region	MODIFIER	LOC119870665-LOC111090691	LOC119870665-LOC111090691	intergenic_region	LOC119870665_3-LOC111090691_3		-1	n.52875954C>T
chr1	52890790	C	T	PASS	T	intergenic_region	MODIFIER	LOC119870665-LOC111090691	LOC119870665-LOC111090691	intergenic_region	LOC119870665_3-LOC111090691_3		-1	n.52890790C>T
chr1	52909090	C	A	PASS	A	intergenic_region	MODIFIER	LOC119870665-LOC111090691	LOC119870665-LOC111090691	intergenic_region	LOC119870665_3-LOC111090691_3		-1	n.52909090C>A
chr1	52917485	C	T	PASS	T	intergenic_region	MODIFIER	LOC119870665-LOC111090691	LOC119870665-LOC111090691	intergenic_region	LOC119870665_3-LOC111090691_3		-1	n.52917485C>T
chr1	52924692	A	G	PASS	G	intergenic_region	MODIFIER	LOC119870665-LOC111090691	LOC119870665-LOC111090691	intergenic_region	LOC119870665_3-LOC111090691_3		-1	n.52924692A>G
chr1	53026697	C	T	PASS	T	intergenic_region	MODIFIER	LOC119870665-LOC111090691	LOC119870665-LOC111090691	intergenic_region	LOC119870665_3-LOC111090691_3		-1	n.53026697C>T
chr1	53050334	AG	A	PASS	A	upstream_gene_variant	MODIFIER	LOC111090691	LOC111090691	transcript	XR_005353094.1	pseudogene	-1	n.-3323delC
chr1	53050334	AG	A	PASS	A	intergenic_region	MODIFIER	LOC111090691-LOC111095940	LOC111090691-LOC111095940	intergenic_region	LOC111090691_3-LOC111095940_3		-1	n.53050335delG
chr1	53103954	A	G	PASS	G	intergenic_region	MODIFIER	LOC111090691-LOC111095940	LOC111090691-LOC111095940	intergenic_region	LOC111090691_3-LOC111095940_3		-1	n.53103954A>G
chr1	53108596	C	T	PASS	T	intergenic_region	MODIFIER	LOC111090691-LOC111095940	LOC111090691-LOC111095940	intergenic_region	LOC111090691_3-LOC111095940_3		-1	n.53108596C>T
chr1	53117192	A	G	PASS	G	intergenic_region	MODIFIER	LOC111090691-LOC111095940	LOC111090691-LOC111095940	intergenic_region	LOC111090691_3-LOC111095940_3		-1	n.53117192A>G
chr1	53122473	T	A	PASS	A	intergenic_region	MODIFIER	LOC111090691-LOC111095940	LOC111090691-LOC111095940	intergenic_region	LOC111090691_3-LOC111095940_3		-1	n.53122473T>A
chr1	53165604	G	A	PASS	A	intron_variant	MODIFIER	LOC111095940	LOC111095940	transcript	XR_005353786.1	pseudogene	2	n.352+2386C>T
chr1	53165604	G	A	PASS	A	intron_variant	MODIFIER	LOC106559700	LOC106559700	transcript	XR_005353784.1	pseudogene	2	n.258-117G>A
chr1	53165604	G	A	PASS	A	intron_variant	MODIFIER	LOC106559700	LOC106559700	transcript	XR_005353783.1	pseudogene	2	n.258-2414G>A
chr1	53165604	G	A	PASS	A	intron_variant	MODIFIER	LOC106559700	LOC106559700	transcript	XR_005353785.1	pseudogene	2	n.258-2414G>A
chr1	53165607	A	G	PASS	G	intron_variant	MODIFIER	LOC111095940	LOC111095940	transcript	XR_005353786.1	pseudogene	2	n.352+2383T>C
chr1	53165607	A	G	PASS	G	intron_variant	MODIFIER	LOC106559700	LOC106559700	transcript	XR_005353784.1	pseudogene	2	n.258-114A>G
chr1	53165607	A	G	PASS	G	intron_variant	MODIFIER	LOC106559700	LOC106559700	transcript	XR_005353783.1	pseudogene	2	n.258-2411A>G
chr1	53165607	A	G	PASS	G	intron_variant	MODIFIER	LOC106559700	LOC106559700	transcript	XR_005353785.1	pseudogene	2	n.258-2411A>G
chr1	53177830	C	T	PASS	T	upstream_gene_variant	MODIFIER	LOC111095940	LOC111095940	transcript	XR_005353786.1	pseudogene	-1	n.-997G>A
chr1	53177830	C	T	PASS	T	downstream_gene_variant	MODIFIER	LOC106559700	LOC106559700	transcript	XR_005353784.1	pseudogene	-1	n.*1164C>T
chr1	53177830	C	T	PASS	T	downstream_gene_variant	MODIFIER	LOC106559700	LOC106559700	transcript	XR_005353783.1	pseudogene	-1	n.*1164C>T
chr1	53177830	C	T	PASS	T	downstream_gene_variant	MODIFIER	LOC106559700	LOC106559700	transcript	XR_005353785.1	pseudogene	-1	n.*1164C>T
chr1	53177830	C	T	PASS	T	intergenic_region	MODIFIER	LOC111095940-LOC119871000	LOC111095940-LOC119871000	intergenic_region	LOC111095940_3-LOC119871000_3		-1	n.53177830C>T
chr1	53250252	T	A	PASS	A	intergenic_region	MODIFIER	LOC111095940-LOC119871000	LOC111095940-LOC119871000	intergenic_region	LOC111095940_3-LOC119871000_3		-1	n.53250252T>A
chr1	53366327	C	T	PASS	T	intergenic_region	MODIFIER	LOC111095940-LOC119871000	LOC111095940-LOC119871000	intergenic_region	LOC111095940_3-LOC119871000_3		-1	n.53366327C>T
chr1	53432057	G	A	PASS	A	intergenic_region	MODIFIER	LOC111095940-LOC119871000	LOC111095940-LOC119871000	intergenic_region	LOC111095940_3-LOC119871000_3		-1	n.53432057G>A
chr1	53486841	C	T	PASS	T	intergenic_region	MODIFIER	LOC111095940-LOC119871000	LOC111095940-LOC119871000	intergenic_region	LOC111095940_3-LOC119871000_3		-1	n.53486841C>T
chr1	53526214	G	A	PASS	A	intergenic_region	MODIFIER	LOC111095940-LOC119871000	LOC111095940-LOC119871000	intergenic_region	LOC111095940_3-LOC119871000_3		-1	n.53526214G>A
chr1	53597663	G	A	PASS	A	intergenic_region	MODIFIER	LOC119871000-LOC100684782	LOC119871000-LOC100684782	intergenic_region	LOC119871000_3-LOC100684782_3		-1	n.53597663G>A
chr1	53630209	G	A	PASS	A	intergenic_region	MODIFIER	LOC119871000-LOC100684782	LOC119871000-LOC100684782	intergenic_region	LOC119871000_3-LOC100684782_3		-1	n.53630209G>A
chr1	53684387	C	T	PASS	T	intergenic_region	MODIFIER	LOC119871000-LOC100684782	LOC119871000-LOC100684782	intergenic_region	LOC119871000_3-LOC100684782_3		-1	n.53684387C>T
chr1	53689444	C	T	PASS	T	intergenic_region	MODIFIER	LOC119871000-LOC100684782	LOC119871000-LOC100684782	intergenic_region	LOC119871000_3-LOC100684782_3		-1	n.53689444C>T
chr1	53762458	A	C	PASS	C	intergenic_region	MODIFIER	LOC119871000-LOC100684782	LOC119871000-LOC100684782	intergenic_region	LOC119871000_3-LOC100684782_3		-1	n.53762458A>C
chr1	53767782	G	T	PASS	T	intergenic_region	MODIFIER	LOC119871000-LOC100684782	LOC119871000-LOC100684782	intergenic_region	LOC119871000_3-LOC100684782_3		-1	n.53767782G>T
chr1	53887557	A	G	PASS	G	intergenic_region	MODIFIER	LOC119870666-C1H6orf118	LOC119870666-C1H6orf118	intergenic_region	LOC119870666_3-C1H6orf118_3		-1	n.53887557A>G
chr1	53898241	G	A	PASS	A	intergenic_region	MODIFIER	LOC119870666-C1H6orf118	LOC119870666-C1H6orf118	intergenic_region	LOC119870666_3-C1H6orf118_3		-1	n.53898241G>A
chr1	53906386	G	A	PASS	A	intergenic_region	MODIFIER	LOC119870666-C1H6orf118	LOC119870666-C1H6orf118	intergenic_region	LOC119870666_3-C1H6orf118_3		-1	n.53906386G>A
chr1	53916542	A	C	PASS	C	intergenic_region	MODIFIER	LOC119870666-C1H6orf118	LOC119870666-C1H6orf118	intergenic_region	LOC119870666_3-C1H6orf118_3		-1	n.53916542A>C
chr1	53920521	G	A	PASS	A	intergenic_region	MODIFIER	LOC119870666-C1H6orf118	LOC119870666-C1H6orf118	intergenic_region	LOC119870666_3-C1H6orf118_3		-1	n.53920521G>A
chr1	53928307	C	T	PASS	T	intergenic_region	MODIFIER	LOC119870666-C1H6orf118	LOC119870666-C1H6orf118	intergenic_region	LOC119870666_3-C1H6orf118_3		-1	n.53928307C>T
chr1	53928679	T	C	PASS	C	intergenic_region	MODIFIER	LOC119870666-C1H6orf118	LOC119870666-C1H6orf118	intergenic_region	LOC119870666_3-C1H6orf118_3		-1	n.53928679T>C
chr1	53931197	G	A	PASS	A	intergenic_region	MODIFIER	LOC119870666-C1H6orf118	LOC119870666-C1H6orf118	intergenic_region	LOC119870666_3-C1H6orf118_3		-1	n.53931197G>A
chr1	53932866	A	C	PASS	C	intergenic_region	MODIFIER	LOC119870666-C1H6orf118	LOC119870666-C1H6orf118	intergenic_region	LOC119870666_3-C1H6orf118_3		-1	n.53932866A>C
chr1	53937872	T	C	PASS	C	intergenic_region	MODIFIER	LOC119870666-C1H6orf118	LOC119870666-C1H6orf118	intergenic_region	LOC119870666_3-C1H6orf118_3		-1	n.53937872T>C
chr1	53938219	C	T	PASS	T	intergenic_region	MODIFIER	LOC119870666-C1H6orf118	LOC119870666-C1H6orf118	intergenic_region	LOC119870666_3-C1H6orf118_3		-1	n.53938219C>T
chr1	53938791	C	T	PASS	T	intergenic_region	MODIFIER	LOC119870666-C1H6orf118	LOC119870666-C1H6orf118	intergenic_region	LOC119870666_3-C1H6orf118_3		-1	n.53938791C>T
chr1	53940579	G	A	PASS	A	intergenic_region	MODIFIER	LOC119870666-C1H6orf118	LOC119870666-C1H6orf118	intergenic_region	LOC119870666_3-C1H6orf118_3		-1	n.53940579G>A
chr1	53941163	T	C	PASS	C	intergenic_region	MODIFIER	LOC119870666-C1H6orf118	LOC119870666-C1H6orf118	intergenic_region	LOC119870666_3-C1H6orf118_3		-1	n.53941163T>C
chr1	53945553	C	T	PASS	T	intergenic_region	MODIFIER	LOC119870666-C1H6orf118	LOC119870666-C1H6orf118	intergenic_region	LOC119870666_3-C1H6orf118_3		-1	n.53945553C>T
chr1	53948456	G	A	PASS	A	intergenic_region	MODIFIER	LOC119870666-C1H6orf118	LOC119870666-C1H6orf118	intergenic_region	LOC119870666_3-C1H6orf118_3		-1	n.53948456G>A
chr1	53948849	A	C	PASS	C	intergenic_region	MODIFIER	LOC119870666-C1H6orf118	LOC119870666-C1H6orf118	intergenic_region	LOC119870666_3-C1H6orf118_3		-1	n.53948849A>C
chr1	53949158	C	T	PASS	T	intergenic_region	MODIFIER	LOC119870666-C1H6orf118	LOC119870666-C1H6orf118	intergenic_region	LOC119870666_3-C1H6orf118_3		-1	n.53949158C>T
chr1	53950128	T	C	PASS	C	intergenic_region	MODIFIER	LOC119870666-C1H6orf118	LOC119870666-C1H6orf118	intergenic_region	LOC119870666_3-C1H6orf118_3		-1	n.53950128T>C
chr1	53950672	C	A	PASS	A	intergenic_region	MODIFIER	LOC119870666-C1H6orf118	LOC119870666-C1H6orf118	intergenic_region	LOC119870666_3-C1H6orf118_3		-1	n.53950672C>A
chr1	53951639	A	G	PASS	G	intergenic_region	MODIFIER	LOC119870666-C1H6orf118	LOC119870666-C1H6orf118	intergenic_region	LOC119870666_3-C1H6orf118_3		-1	n.53951639A>G
chr1	53952021	T	A	PASS	A	intergenic_region	MODIFIER	LOC119870666-C1H6orf118	LOC119870666-C1H6orf118	intergenic_region	LOC119870666_3-C1H6orf118_3		-1	n.53952021T>A
chr1	53952046	C	T	PASS	T	intergenic_region	MODIFIER	LOC119870666-C1H6orf118	LOC119870666-C1H6orf118	intergenic_region	LOC119870666_3-C1H6orf118_3		-1	n.53952046C>T
chr1	53952063	G	A	PASS	A	intergenic_region	MODIFIER	LOC119870666-C1H6orf118	LOC119870666-C1H6orf118	intergenic_region	LOC119870666_3-C1H6orf118_3		-1	n.53952063G>A
chr1	53952207	G	A	PASS	A	intergenic_region	MODIFIER	LOC119870666-C1H6orf118	LOC119870666-C1H6orf118	intergenic_region	LOC119870666_3-C1H6orf118_3		-1	n.53952207G>A
chr1	53952321	C	T	PASS	T	intergenic_region	MODIFIER	LOC119870666-C1H6orf118	LOC119870666-C1H6orf118	intergenic_region	LOC119870666_3-C1H6orf118_3		-1	n.53952321C>T
chr1	53952451	G	A	PASS	A	intergenic_region	MODIFIER	LOC119870666-C1H6orf118	LOC119870666-C1H6orf118	intergenic_region	LOC119870666_3-C1H6orf118_3		-1	n.53952451G>A
chr1	53952463	T	C	PASS	C	intergenic_region	MODIFIER	LOC119870666-C1H6orf118	LOC119870666-C1H6orf118	intergenic_region	LOC119870666_3-C1H6orf118_3		-1	n.53952463T>C
chr1	53952618	G	A	PASS	A	intergenic_region	MODIFIER	LOC119870666-C1H6orf118	LOC119870666-C1H6orf118	intergenic_region	LOC119870666_3-C1H6orf118_3		-1	n.53952618G>A
chr1	53952726	T	G	PASS	G	intergenic_region	MODIFIER	LOC119870666-C1H6orf118	LOC119870666-C1H6orf118	intergenic_region	LOC119870666_3-C1H6orf118_3		-1	n.53952726T>G
chr1	53952875	G	A	PASS	A	intergenic_region	MODIFIER	LOC119870666-C1H6orf118	LOC119870666-C1H6orf118	intergenic_region	LOC119870666_3-C1H6orf118_3		-1	n.53952875G>A
chr1	53952949	G	A	PASS	A	intergenic_region	MODIFIER	LOC119870666-C1H6orf118	LOC119870666-C1H6orf118	intergenic_region	LOC119870666_3-C1H6orf118_3		-1	n.53952949G>A
chr1	53952950	G	T	PASS	T	intergenic_region	MODIFIER	LOC119870666-C1H6orf118	LOC119870666-C1H6orf118	intergenic_region	LOC119870666_3-C1H6orf118_3		-1	n.53952950G>T
chr1	53952985	A	G	PASS	G	intergenic_region	MODIFIER	LOC119870666-C1H6orf118	LOC119870666-C1H6orf118	intergenic_region	LOC119870666_3-C1H6orf118_3		-1	n.53952985A>G
chr1	53953137	T	C	PASS	C	intergenic_region	MODIFIER	LOC119870666-C1H6orf118	LOC119870666-C1H6orf118	intergenic_region	LOC119870666_3-C1H6orf118_3		-1	n.53953137T>C
chr1	53953177	G	A	PASS	A	intergenic_region	MODIFIER	LOC119870666-C1H6orf118	LOC119870666-C1H6orf118	intergenic_region	LOC119870666_3-C1H6orf118_3		-1	n.53953177G>A
chr1	53953181	T	G	PASS	G	intergenic_region	MODIFIER	LOC119870666-C1H6orf118	LOC119870666-C1H6orf118	intergenic_region	LOC119870666_3-C1H6orf118_3		-1	n.53953181T>G
chr1	53953186	C	G	PASS	G	intergenic_region	MODIFIER	LOC119870666-C1H6orf118	LOC119870666-C1H6orf118	intergenic_region	LOC119870666_3-C1H6orf118_3		-1	n.53953186C>G
chr1	53953259	G	A	PASS	A	intergenic_region	MODIFIER	LOC119870666-C1H6orf118	LOC119870666-C1H6orf118	intergenic_region	LOC119870666_3-C1H6orf118_3		-1	n.53953259G>A
chr1	53953325	G	GC	PASS	GC	intergenic_region	MODIFIER	LOC119870666-C1H6orf118	LOC119870666-C1H6orf118	intergenic_region	LOC119870666_3-C1H6orf118_3		-1	n.53953325_53953326insC
chr1	53953436	G	A	PASS	A	intergenic_region	MODIFIER	LOC119870666-C1H6orf118	LOC119870666-C1H6orf118	intergenic_region	LOC119870666_3-C1H6orf118_3		-1	n.53953436G>A
chr1	53953803	G	A	PASS	A	intergenic_region	MODIFIER	LOC119870666-C1H6orf118	LOC119870666-C1H6orf118	intergenic_region	LOC119870666_3-C1H6orf118_3		-1	n.53953803G>A
chr1	53954521	CAT	C	PASS	C	intergenic_region	MODIFIER	LOC119870666-C1H6orf118	LOC119870666-C1H6orf118	intergenic_region	LOC119870666_3-C1H6orf118_3		-1	n.53954522_53954523delAT
chr1	53957081	G	A	VQSRTrancheSNP99.90to100.00	A	intergenic_region	MODIFIER	LOC119870666-C1H6orf118	LOC119870666-C1H6orf118	intergenic_region	LOC119870666_3-C1H6orf118_3		-1	n.53957081G>A
chr1	53957549	AAGC	A	PASS	A	intergenic_region	MODIFIER	LOC119870666-C1H6orf118	LOC119870666-C1H6orf118	intergenic_region	LOC119870666_3-C1H6orf118_3		-1	n.53957550_53957552delAGC
chr1	53957554	C	CAA	PASS	CAA	intergenic_region	MODIFIER	LOC119870666-C1H6orf118	LOC119870666-C1H6orf118	intergenic_region	LOC119870666_3-C1H6orf118_3		-1	n.53957554_53957555insAA
chr1	53957557	GGA	G	PASS	G	intergenic_region	MODIFIER	LOC119870666-C1H6orf118	LOC119870666-C1H6orf118	intergenic_region	LOC119870666_3-C1H6orf118_3		-1	n.53957558_53957559delGA
chr1	53957824	G	A	PASS	A	intergenic_region	MODIFIER	LOC119870666-C1H6orf118	LOC119870666-C1H6orf118	intergenic_region	LOC119870666_3-C1H6orf118_3		-1	n.53957824G>A
chr1	53958539	A	G	PASS	G	intergenic_region	MODIFIER	LOC119870666-C1H6orf118	LOC119870666-C1H6orf118	intergenic_region	LOC119870666_3-C1H6orf118_3		-1	n.53958539A>G
chr1	53958846	A	G	PASS	G	intergenic_region	MODIFIER	LOC119870666-C1H6orf118	LOC119870666-C1H6orf118	intergenic_region	LOC119870666_3-C1H6orf118_3		-1	n.53958846A>G
chr1	53959237	C	T	PASS	T	intergenic_region	MODIFIER	LOC119870666-C1H6orf118	LOC119870666-C1H6orf118	intergenic_region	LOC119870666_3-C1H6orf118_3		-1	n.53959237C>T
chr1	53960194	AGCATTTAAGTGAAGTG	A	PASS	A	intergenic_region	MODIFIER	LOC119870666-C1H6orf118	LOC119870666-C1H6orf118	intergenic_region	LOC119870666_3-C1H6orf118_3		-1	n.53960195_53960210delGCATTTAAGTGAAGTG
chr1	53960810	CACAG	C	PASS	C	intergenic_region	MODIFIER	LOC119870666-C1H6orf118	LOC119870666-C1H6orf118	intergenic_region	LOC119870666_3-C1H6orf118_3		-1	n.53960811_53960814delACAG
chr1	53961523	G	A	PASS	A	intergenic_region	MODIFIER	LOC119870666-C1H6orf118	LOC119870666-C1H6orf118	intergenic_region	LOC119870666_3-C1H6orf118_3		-1	n.53961523G>A
chr1	53961547	G	A	PASS	A	intergenic_region	MODIFIER	LOC119870666-C1H6orf118	LOC119870666-C1H6orf118	intergenic_region	LOC119870666_3-C1H6orf118_3		-1	n.53961547G>A
chr1	53968453	T	G	PASS	G	downstream_gene_variant	MODIFIER	C1H6orf118	C1H6orf118	transcript	XM_038526518.1	protein_coding	-1	c.*3128A>C
chr1	53968453	T	G	PASS	G	intergenic_region	MODIFIER	LOC119870666-C1H6orf118	LOC119870666-C1H6orf118	intergenic_region	LOC119870666_3-C1H6orf118_3		-1	n.53968453T>G
chr1	53968500	G	A	PASS	A	downstream_gene_variant	MODIFIER	C1H6orf118	C1H6orf118	transcript	XM_038526518.1	protein_coding	-1	c.*3081C>T
chr1	53968500	G	A	PASS	A	intergenic_region	MODIFIER	LOC119870666-C1H6orf118	LOC119870666-C1H6orf118	intergenic_region	LOC119870666_3-C1H6orf118_3		-1	n.53968500G>A
chr1	53968659	C	T	PASS	T	downstream_gene_variant	MODIFIER	C1H6orf118	C1H6orf118	transcript	XM_038526518.1	protein_coding	-1	c.*2922G>A
chr1	53968659	C	T	PASS	T	intergenic_region	MODIFIER	LOC119870666-C1H6orf118	LOC119870666-C1H6orf118	intergenic_region	LOC119870666_3-C1H6orf118_3		-1	n.53968659C>T
chr1	53968667	A	G	PASS	G	downstream_gene_variant	MODIFIER	C1H6orf118	C1H6orf118	transcript	XM_038526518.1	protein_coding	-1	c.*2914T>C
chr1	53968667	A	G	PASS	G	intergenic_region	MODIFIER	LOC119870666-C1H6orf118	LOC119870666-C1H6orf118	intergenic_region	LOC119870666_3-C1H6orf118_3		-1	n.53968667A>G
chr1	53968692	G	A	PASS	A	downstream_gene_variant	MODIFIER	C1H6orf118	C1H6orf118	transcript	XM_038526518.1	protein_coding	-1	c.*2889C>T
chr1	53968692	G	A	PASS	A	intergenic_region	MODIFIER	LOC119870666-C1H6orf118	LOC119870666-C1H6orf118	intergenic_region	LOC119870666_3-C1H6orf118_3		-1	n.53968692G>A
chr1	53968696	T	G	PASS	G	downstream_gene_variant	MODIFIER	C1H6orf118	C1H6orf118	transcript	XM_038526518.1	protein_coding	-1	c.*2885A>C
chr1	53968696	T	G	PASS	G	intergenic_region	MODIFIER	LOC119870666-C1H6orf118	LOC119870666-C1H6orf118	intergenic_region	LOC119870666_3-C1H6orf118_3		-1	n.53968696T>G
chr1	53968699	C	T	PASS	T	downstream_gene_variant	MODIFIER	C1H6orf118	C1H6orf118	transcript	XM_038526518.1	protein_coding	-1	c.*2882G>A
chr1	53968699	C	T	PASS	T	intergenic_region	MODIFIER	LOC119870666-C1H6orf118	LOC119870666-C1H6orf118	intergenic_region	LOC119870666_3-C1H6orf118_3		-1	n.53968699C>T
chr1	53969126	A	G	PASS	G	downstream_gene_variant	MODIFIER	C1H6orf118	C1H6orf118	transcript	XM_038526518.1	protein_coding	-1	c.*2455T>C
chr1	53969126	A	G	PASS	G	intergenic_region	MODIFIER	LOC119870666-C1H6orf118	LOC119870666-C1H6orf118	intergenic_region	LOC119870666_3-C1H6orf118_3		-1	n.53969126A>G
chr1	53988752	G	A	PASS	A	intron_variant	MODIFIER	C1H6orf118	C1H6orf118	transcript	XM_038526518.1	protein_coding	4	c.882+311C>T
chr1	53988841	C	T	PASS	T	intron_variant	MODIFIER	C1H6orf118	C1H6orf118	transcript	XM_038526518.1	protein_coding	4	c.882+222G>A
chr1	54414451	C	T	PASS	T	intergenic_region	MODIFIER	LOC100685014-TBXT	LOC100685014-TBXT	intergenic_region	LOC100685014_3-TBXT_3		-1	n.54414451C>T
chr1	54556678	G	A	PASS	A	intergenic_region	MODIFIER	LOC100685014-TBXT	LOC100685014-TBXT	intergenic_region	LOC100685014_3-TBXT_3		-1	n.54556678G>A
chr1	54663533	C	T	PASS	T	intergenic_region	MODIFIER	LOC100685014-TBXT	LOC100685014-TBXT	intergenic_region	LOC100685014_3-TBXT_3		-1	n.54663533C>T
chr1	54789197	C	A	PASS	A	intergenic_region	MODIFIER	TBXT-LOC119869870	TBXT-LOC119869870	intergenic_region	TBXT_3-LOC119869870_3		-1	n.54789197C>A
chr1	54909230	G	C	PASS	C	intergenic_region	MODIFIER	SFT2D1-MPC1	SFT2D1-MPC1	intergenic_region	SFT2D1_3-MPC1_3		-1	n.54909230G>C
chr1	54965917	G	A	PASS	A	3_prime_UTR_variant	MODIFIER	RPS6KA2	RPS6KA2	transcript	XM_038526526.1	protein_coding	23	c.*908C>T
chr1	54965917	G	A	PASS	A	3_prime_UTR_variant	MODIFIER	RPS6KA2	RPS6KA2	transcript	XM_038526531.1	protein_coding	21	c.*908C>T
chr1	54965917	G	A	PASS	A	3_prime_UTR_variant	MODIFIER	RPS6KA2	RPS6KA2	transcript	XM_038526529.1	protein_coding	21	c.*908C>T
chr1	54965917	G	A	PASS	A	3_prime_UTR_variant	MODIFIER	RPS6KA2	RPS6KA2	transcript	XM_038526527.1	protein_coding	21	c.*908C>T
chr1	54965917	G	A	PASS	A	3_prime_UTR_variant	MODIFIER	RPS6KA2	RPS6KA2	transcript	XM_038526530.1	protein_coding	21	c.*908C>T
chr1	54965917	G	A	PASS	A	3_prime_UTR_variant	MODIFIER	RPS6KA2	RPS6KA2	transcript	XM_038526528.1	protein_coding	22	c.*908C>T
chr1	54975104	C	T	PASS	T	intron_variant	MODIFIER	RPS6KA2	RPS6KA2	transcript	XM_038526526.1	protein_coding	20	c.1895+13G>A
chr1	54975104	C	T	PASS	T	intron_variant	MODIFIER	RPS6KA2	RPS6KA2	transcript	XM_038526531.1	protein_coding	18	c.1724+13G>A
chr1	54975104	C	T	PASS	T	intron_variant	MODIFIER	RPS6KA2	RPS6KA2	transcript	XM_038526529.1	protein_coding	18	c.1787+13G>A
chr1	54975104	C	T	PASS	T	intron_variant	MODIFIER	RPS6KA2	RPS6KA2	transcript	XM_038526527.1	protein_coding	18	c.1820+13G>A
chr1	54975104	C	T	PASS	T	intron_variant	MODIFIER	RPS6KA2	RPS6KA2	transcript	XM_038526530.1	protein_coding	18	c.1772+13G>A
chr1	54975104	C	T	PASS	T	intron_variant	MODIFIER	RPS6KA2	RPS6KA2	transcript	XM_038526528.1	protein_coding	19	c.1814+13G>A
chr1	55365465	G	A	PASS	A	intron_variant	MODIFIER	RNASET2	RNASET2	transcript	XM_038526532.1	protein_coding	5	c.264+704C>T
chr1	55365465	G	A	PASS	A	intron_variant	MODIFIER	RNASET2	RNASET2	transcript	XR_005353795.1	pseudogene	5	n.498+704C>T
chr1	55365465	G	A	PASS	A	intron_variant	MODIFIER	RNASET2	RNASET2	transcript	XM_038526534.1	protein_coding	5	c.264+704C>T
chr1	55365465	G	A	PASS	A	intron_variant	MODIFIER	RNASET2	RNASET2	transcript	XM_038526533.1	protein_coding	5	c.264+704C>T
chr1	55485584	T	C	PASS	C	intron_variant	MODIFIER	CCR6	CCR6	transcript	XM_038526544.1	protein_coding	1	c.-189+1108T>C
chr1	55538603	T	C	PASS	C	intergenic_region	MODIFIER	GPR31-LOC484082	GPR31-LOC484082	intergenic_region	GPR31_3-LOC484082_3		-1	n.55538603T>C
chr1	55567795	T	TAGTG	PASS	TAGTG	intron_variant	MODIFIER	LOC484082	LOC484082	transcript	XM_038526545.1	protein_coding	10	c.1241-1666_1241-1665insAGTG
chr1	55571279	A	G	PASS	G	3_prime_UTR_variant	MODIFIER	LOC484082	LOC484082	transcript	XM_038526545.1	protein_coding	13	c.*50A>G
chr1	55593848	T	G	PASS	G	upstream_gene_variant	MODIFIER	TTLL2_2	TTLL2_2	transcript	XM_038526546.1	protein_coding	-1	c.-4436A>C
chr1	55593848	T	G	PASS	G	upstream_gene_variant	MODIFIER	LOC111095973	LOC111095973	transcript	XR_005353801.1	pseudogene	-1	n.-3074T>G
chr1	55593848	T	G	PASS	G	upstream_gene_variant	MODIFIER	LOC111095973	LOC111095973	transcript	XR_005353800.1	pseudogene	-1	n.-3075T>G
chr1	55593848	T	G	PASS	G	intergenic_region	MODIFIER	TTLL2_2-LOC111095973	TTLL2_2-LOC111095973	intergenic_region	TTLL2_2-LOC111095973_3		-1	n.55593848T>G
chr1	55641754	T	C	PASS	C	upstream_gene_variant	MODIFIER	LOC102153253	LOC102153253	transcript	XR_005353799.1	pseudogene	-1	n.-4162T>C
chr1	55641754	T	C	PASS	C	upstream_gene_variant	MODIFIER	UNC93A	UNC93A	transcript	XM_038526551.1	protein_coding	-1	c.-79A>G
chr1	55641754	T	C	PASS	C	upstream_gene_variant	MODIFIER	LOC102153253	LOC102153253	transcript	XR_005353798.1	pseudogene	-1	n.-4162T>C
chr1	55641754	T	C	PASS	C	intron_variant	MODIFIER	UNC93A	UNC93A	transcript	XM_038526547.1	protein_coding	2	c.-52+2453A>G
chr1	55641754	T	C	PASS	C	intron_variant	MODIFIER	UNC93A	UNC93A	transcript	XM_038526548.1	protein_coding	1	c.-52+2453A>G
chr1	55641754	T	C	PASS	C	intron_variant	MODIFIER	UNC93A	UNC93A	transcript	XM_038526549.1	protein_coding	2	c.-52+2453A>G
chr1	55641754	T	C	PASS	C	intron_variant	MODIFIER	UNC93A	UNC93A	transcript	XM_038526550.1	protein_coding	3	c.-52+1173A>G
chr1	55646789	G	T	PASS	T	upstream_gene_variant	MODIFIER	UNC93A	UNC93A	transcript	XM_038526547.1	protein_coding	-1	c.-609C>A
chr1	55646789	G	T	PASS	T	upstream_gene_variant	MODIFIER	UNC93A	UNC93A	transcript	XM_038526548.1	protein_coding	-1	c.-2634C>A
chr1	55646789	G	T	PASS	T	upstream_gene_variant	MODIFIER	UNC93A	UNC93A	transcript	XM_038526549.1	protein_coding	-1	c.-617C>A
chr1	55646789	G	T	PASS	T	upstream_gene_variant	MODIFIER	UNC93A	UNC93A	transcript	XM_038526550.1	protein_coding	-1	c.-747C>A
chr1	55646789	G	T	PASS	T	intron_variant	MODIFIER	LOC102153253	LOC102153253	transcript	XR_005353799.1	pseudogene	1	n.823+51G>T
chr1	55646789	G	T	PASS	T	intron_variant	MODIFIER	LOC102153253	LOC102153253	transcript	XR_005353798.1	pseudogene	1	n.823+51G>T
chr1	55876322	G	C	PASS	C	intergenic_region	MODIFIER	LOC111095986-LOC111095989	LOC111095986-LOC111095989	intergenic_region	LOC111095986_3-LOC111095989_3		-1	n.55876322G>C
chr1	55889578	A	T	PASS	T	intergenic_region	MODIFIER	LOC111095986-LOC111095989	LOC111095986-LOC111095989	intergenic_region	LOC111095986_3-LOC111095989_3		-1	n.55889578A>T
chr1	56222358	T	TG	PASS	TG	intergenic_region	MODIFIER	LOC119870159-LOC111090696	LOC119870159-LOC111090696	intergenic_region	LOC119870159_3-LOC111090696_3		-1	n.56222358_56222359insG
chr1	56628708	T	C	PASS	C	intergenic_region	MODIFIER	SMOC2-LOC102153755	SMOC2-LOC102153755	intergenic_region	SMOC2_3-LOC102153755_3		-1	n.56628708T>C
chr1	56967028	C	T	PASS	T	missense_variant	MODERATE	THBS2	THBS2	transcript	NM_001197156.3_3	protein_coding	12	c.1897G>A	p.Val633Ile
chr1	57029089	AACAC	A	PASS	A	intergenic_region	MODIFIER	LOC102153803-LOC119870670	LOC102153803-LOC119870670	intergenic_region	LOC102153803_3-LOC119870670_3		-1	n.57029090_57029093delACAC
chr1	57057049	G	GATAAAGATGTGAGA	ReadPosRankSum-2	GATAAAGATGTGAGA	intergenic_region	MODIFIER	LOC102153803-LOC119870670	LOC102153803-LOC119870670	intergenic_region	LOC102153803_3-LOC119870670_3		-1	n.57057049_57057050insATAAAGATGTGAGA
chr1	57057052	T	TATAGA	PASS	TATAGA	intergenic_region	MODIFIER	LOC102153803-LOC119870670	LOC102153803-LOC119870670	intergenic_region	LOC102153803_3-LOC119870670_3		-1	n.57057052_57057053insATAGA
chr1	57057055	T	TA	PASS	TA	intergenic_region	MODIFIER	LOC102153803-LOC119870670	LOC102153803-LOC119870670	intergenic_region	LOC102153803_3-LOC119870670_3		-1	n.57057055_57057056insA
chr1	57057057	C	A	VQSRTrancheSNP99.90to100.00	A	intergenic_region	MODIFIER	LOC102153803-LOC119870670	LOC102153803-LOC119870670	intergenic_region	LOC102153803_3-LOC119870670_3		-1	n.57057057C>A
chr1	57057059	A	AC	ReadPosRankSum-2	AC	intergenic_region	MODIFIER	LOC102153803-LOC119870670	LOC102153803-LOC119870670	intergenic_region	LOC102153803_3-LOC119870670_3		-1	n.57057059_57057060insC
chr1	57057061	G	GATATAGATATAGA	ReadPosRankSum-2	GATATAGATATAGA	intergenic_region	MODIFIER	LOC102153803-LOC119870670	LOC102153803-LOC119870670	intergenic_region	LOC102153803_3-LOC119870670_3		-1	n.57057061_57057062insATATAGATATAGA
chr1	57057068	A	AGGTACAGGTACAGATATAGATATAGAAACATATACACACAATGT	PASS	AGGTACAGGTACAGATATAGATATAGAAACATATACACACAATGT	intergenic_region	MODIFIER	LOC102153803-LOC119870670	LOC102153803-LOC119870670	intergenic_region	LOC102153803_3-LOC119870670_3		-1	n.57057068_57057069insGGTACAGGTACAGATATAGATATAGAAACATATACACACAATGT
chr1	57057072	A	ACTATTCAGCCATC	PASS	ACTATTCAGCCATC	intergenic_region	MODIFIER	LOC102153803-LOC119870670	LOC102153803-LOC119870670	intergenic_region	LOC102153803_3-LOC119870670_3		-1	n.57057072_57057073insCTATTCAGCCATC
chr1	57057074	AT	A	PASS	A	intergenic_region	MODIFIER	LOC102153803-LOC119870670	LOC102153803-LOC119870670	intergenic_region	LOC102153803_3-LOC119870670_3		-1	n.57057075delT
chr1	57057080	A	G	PASS	G	intergenic_region	MODIFIER	LOC102153803-LOC119870670	LOC102153803-LOC119870670	intergenic_region	LOC102153803_3-LOC119870670_3		-1	n.57057080A>G
chr1	57057082	A	ATCTTGCTGTTCGCAAGAACT	PASS	ATCTTGCTGTTCGCAAGAACT	intergenic_region	MODIFIER	LOC102153803-LOC119870670	LOC102153803-LOC119870670	intergenic_region	LOC102153803_3-LOC119870670_3		-1	n.57057082_57057083insTCTTGCTGTTCGCAAGAACT
chr1	57063452	G	A	PASS	A	intergenic_region	MODIFIER	LOC102153803-LOC119870670	LOC102153803-LOC119870670	intergenic_region	LOC102153803_3-LOC119870670_3		-1	n.57063452G>A
chr1	57391801	T	C	PASS	C	intron_variant	MODIFIER	DSE	DSE	transcript	XM_038526609.1	protein_coding	2	c.417-17048T>C
chr1	57391801	T	C	PASS	C	intron_variant	MODIFIER	DSE	DSE	transcript	XM_038526611.1	protein_coding	2	c.417-17048T>C
chr1	57391801	T	C	PASS	C	intron_variant	MODIFIER	DSE	DSE	transcript	XM_038526610.1	protein_coding	2	c.417-17048T>C
chr1	57391801	T	C	PASS	C	intron_variant	MODIFIER	DSE	DSE	transcript	XM_038526612.1	protein_coding	1	c.-145-17048T>C
chr1	57391801	T	C	PASS	C	intron_variant	MODIFIER	DSE	DSE	transcript	XM_038526613.1	protein_coding	1	c.-146+3884T>C
chr1	58681510	C	T	VQSRTrancheSNP99.90to100.00	T	intron_variant	MODIFIER	SLC35F1	SLC35F1	transcript	XM_038525493.1	protein_coding	1	c.176+112655C>T
chr1	58681510	C	T	VQSRTrancheSNP99.90to100.00	T	intron_variant	MODIFIER	LOC111096073	LOC111096073	transcript	XR_005353819.1	pseudogene	1	n.111+27624C>T
chr1	58681510	C	T	VQSRTrancheSNP99.90to100.00	T	intron_variant	MODIFIER	LOC111096073	LOC111096073	transcript	XR_005353820.1	pseudogene	1	n.111+27624C>T
chr1	59646541	C	G	PASS	G	intergenic_region	MODIFIER	FAM184A-LOC100687227	FAM184A-LOC100687227	intergenic_region	FAM184A_3-LOC100687227_3		-1	n.59646541C>G
chr1	59835929	C	T	PASS	T	upstream_gene_variant	MODIFIER	MAN1A1	MAN1A1	transcript	XM_038526670.1	protein_coding	-1	c.-693G>A
chr1	59835929	C	T	PASS	T	intergenic_region	MODIFIER	MAN1A1-LOC100687379	MAN1A1-LOC100687379	intergenic_region	MAN1A1_3-LOC100687379_3		-1	n.59835929C>T
chr1	60632781	C	T	PASS	T	intergenic_region	MODIFIER	LOC119870672-LOC111096174	LOC119870672-LOC111096174	intergenic_region	LOC119870672_3-LOC111096174_3		-1	n.60632781C>T
chr1	61569985	C	CTTTCTTTCTTTCTTTCTTTCTTTCTTTCTTTCTTTCTTTCTTTCTTTCTTTCTTTTTCTTTCTTTCTTTCTTTCTTTCTTTCTTTCTTTCTTTCTTCTTTCTTT	PASS	CTTTCTTTCTTTCTTTCTTTCTTTCTTTCTTTCTTTCTTTCTTTCTTTCTTTCTTTTTCTTTCTTTCTTTCTTTCTTTCTTTCTTTCTTTCTTTCTTCTTTCTTT	upstream_gene_variant	MODIFIER	LOC484108	LOC484108	transcript	XM_038525495.1	protein_coding	-1	c.-3368_-3367insTTTCTTTCTTTCTTTCTTTCTTTCTTTCTTTCTTTCTTTCTTTCTTTCTTTCTTTTTCTTTCTTTCTTTCTTTCTTTCTTTCTTTCTTTCTTTCTTCTTTCTTT
chr1	61569985	C	CTTTCTTTCTTTCTTTCTTTCTTTCTTTCTTTCTTTCTTTCTTTCTTTCTTTCTTTTTCTTTCTTTCTTTCTTTCTTTCTTTCTTTCTTTCTTTCTTCTTTCTTT	PASS	CTTTCTTTCTTTCTTTCTTTCTTTCTTTCTTTCTTTCTTTCTTTCTTTCTTTCTTTTTCTTTCTTTCTTTCTTTCTTTCTTTCTTTCTTTCTTTCTTCTTTCTTT	downstream_gene_variant	MODIFIER	LOC119870673	LOC119870673	transcript	XR_005353112.1	pseudogene	-1	n.*50_*51insTTTCTTTCTTTCTTTCTTTCTTTCTTTCTTTCTTTCTTTCTTTCTTTCTTTCTTTTTCTTTCTTTCTTTCTTTCTTTCTTTCTTTCTTTCTTTCTTCTTTCTTT
chr1	61569985	C	CTTTCTTTCTTTCTTTCTTTCTTTCTTTCTTTCTTTCTTTCTTTCTTTCTTTCTTTTTCTTTCTTTCTTTCTTTCTTTCTTTCTTTCTTTCTTTCTTCTTTCTTT	PASS	CTTTCTTTCTTTCTTTCTTTCTTTCTTTCTTTCTTTCTTTCTTTCTTTCTTTCTTTTTCTTTCTTTCTTTCTTTCTTTCTTTCTTTCTTTCTTTCTTCTTTCTTT	intergenic_region	MODIFIER	LOC119870673-LOC484108	LOC119870673-LOC484108	intergenic_region	LOC119870673_3-LOC484108_3		-1	n.61569985_61569986insTTTCTTTCTTTCTTTCTTTCTTTCTTTCTTTCTTTCTTTCTTTCTTTCTTTCTTTTTCTTTCTTTCTTTCTTTCTTTCTTTCTTTCTTTCTTTCTTCTTTCTTT
chr1	62335144	T	G	PASS	G	intergenic_region	MODIFIER	LOC106558802-HSF2	LOC106558802-HSF2	intergenic_region	LOC106558802_3-HSF2_3		-1	n.62335144T>G
chr1	63368918	G	A	PASS	A	intergenic_region	MODIFIER	TRDN-NKAIN2	TRDN-NKAIN2	intergenic_region	TRDN_3-NKAIN2_3		-1	n.63368918G>A
chr1	63554381	G	A	PASS	A	intron_variant	MODIFIER	NKAIN2	NKAIN2	transcript	XM_038526700.1	protein_coding	1	c.54+69355G>A
chr1	63554381	G	A	PASS	A	intron_variant	MODIFIER	NKAIN2	NKAIN2	transcript	XM_038526702.1	protein_coding	1	c.54+69355G>A
chr1	63554381	G	A	PASS	A	intron_variant	MODIFIER	NKAIN2	NKAIN2	transcript	XM_038526701.1	protein_coding	1	c.54+69355G>A
chr1	64592835	A	C	PASS	C	intron_variant	MODIFIER	RNF217	RNF217	transcript	XM_038525496.1	protein_coding	2	c.679-26706A>C
chr1	64698863	T	G	PASS	G	intron_variant	MODIFIER	TPD52L1	TPD52L1	transcript	XM_038526703.1	protein_coding	1	c.19+1426T>G
chr1	64698863	T	G	PASS	G	intron_variant	MODIFIER	TPD52L1	TPD52L1	transcript	XM_038526713.1	protein_coding	1	c.19+1426T>G
chr1	64698863	T	G	PASS	G	intron_variant	MODIFIER	TPD52L1	TPD52L1	transcript	XM_038526715.1	protein_coding	1	c.19+1426T>G
chr1	64698863	T	G	PASS	G	intron_variant	MODIFIER	TPD52L1	TPD52L1	transcript	XM_038526717.1	protein_coding	1	c.19+1426T>G
chr1	64698863	T	G	PASS	G	intron_variant	MODIFIER	TPD52L1	TPD52L1	transcript	XM_038526707.1	protein_coding	1	c.19+1426T>G
chr1	64698863	T	G	PASS	G	intron_variant	MODIFIER	TPD52L1	TPD52L1	transcript	XM_038526709.1	protein_coding	1	c.19+1426T>G
chr1	64698863	T	G	PASS	G	intron_variant	MODIFIER	TPD52L1	TPD52L1	transcript	XM_038526710.1	protein_coding	1	c.19+1426T>G
chr1	64698863	T	G	PASS	G	intron_variant	MODIFIER	TPD52L1	TPD52L1	transcript	XM_038526708.1	protein_coding	1	c.19+1426T>G
chr1	64698863	T	G	PASS	G	intron_variant	MODIFIER	TPD52L1	TPD52L1	transcript	XM_038526712.1	protein_coding	1	c.19+1426T>G
chr1	64698863	T	G	PASS	G	intron_variant	MODIFIER	TPD52L1	TPD52L1	transcript	XM_038526716.1	protein_coding	1	c.19+1426T>G
chr1	64698863	T	G	PASS	G	intron_variant	MODIFIER	TPD52L1	TPD52L1	transcript	XM_038526714.1	protein_coding	1	c.19+1426T>G
chr1	64698863	T	G	PASS	G	intron_variant	MODIFIER	TPD52L1	TPD52L1	transcript	XM_038526711.1	protein_coding	1	c.19+1426T>G
chr1	64698863	T	G	PASS	G	intron_variant	MODIFIER	TPD52L1	TPD52L1	transcript	XM_038526718.1	protein_coding	1	c.19+1426T>G
chr1	64698863	T	G	PASS	G	intron_variant	MODIFIER	TPD52L1	TPD52L1	transcript	XM_038526704.1	protein_coding	1	c.19+1426T>G
chr1	64698863	T	G	PASS	G	intron_variant	MODIFIER	TPD52L1	TPD52L1	transcript	XM_038526706.1	protein_coding	1	c.19+1426T>G
chr1	65169738	G	GT	PASS	GT	intergenic_region	MODIFIER	LOC100688589-LOC612667	LOC100688589-LOC612667	intergenic_region	LOC100688589_3-LOC612667_3		-1	n.65169738_65169739insT
chr1	65562828	ATAAT	A	PASS	A	intergenic_region	MODIFIER	TRMT11-LOC100682630	TRMT11-LOC100682630	intergenic_region	TRMT11_3-LOC100682630_3		-1	n.65562829_65562832delTAAT
chr1	65850917	T	C	PASS	C	intergenic_region	MODIFIER	LOC111096231-LOC119871007	LOC111096231-LOC119871007	intergenic_region	LOC111096231_3-LOC119871007_3		-1	n.65850917T>C
chr1	65962578	G	T	PASS	T	intergenic_region	MODIFIER	LOC111096231-LOC119871007	LOC111096231-LOC119871007	intergenic_region	LOC111096231_3-LOC119871007_3		-1	n.65962578G>T
chr1	65974782	T	A	PASS	A	intergenic_region	MODIFIER	LOC111096231-LOC119871007	LOC111096231-LOC119871007	intergenic_region	LOC111096231_3-LOC119871007_3		-1	n.65974782T>A
chr1	66162936	C	T	PASS	T	intergenic_region	MODIFIER	LOC100684456-LOC102153070	LOC100684456-LOC102153070	intergenic_region	LOC100684456_3-LOC102153070_3		-1	n.66162936C>T
chr1	66582286	T	A	PASS	A	intron_variant	MODIFIER	ECHDC1	ECHDC1	transcript	XM_038526746.1	protein_coding	5	c.516-8953A>T
chr1	66582286	T	A	PASS	A	intron_variant	MODIFIER	ECHDC1	ECHDC1	transcript	XM_038526748.1	protein_coding	5	c.498-8953A>T
chr1	66582286	T	A	PASS	A	intron_variant	MODIFIER	ECHDC1	ECHDC1	transcript	XM_038526747.1	protein_coding	5	c.498-8953A>T
chr1	66754409	A	C	PASS	C	intron_variant	MODIFIER	SOGA3	SOGA3	transcript	XM_038526749.1	protein_coding	5	c.1512+6127T>G
chr1	67048733	G	GGGGGAGGAGCAAGATGGCGGAGGAGTAGGGTCTCCAAATCACCTGTCTCC	PASS	GGGGGAGGAGCAAGATGGCGGAGGAGTAGGGTCTCCAAATCACCTGTCTCC	intron_variant	MODIFIER	THEMIS	THEMIS	transcript	XM_038526750.1	protein_coding	2	c.268+11102_268+11103insGGAGACAGGTGATTTGGAGACCCTACTCCTCCGCCATCTTGCTCCTCCCC
chr1	67048733	G	GGGGGAGGAGCAAGATGGCGGAGGAGTAGGGTCTCCAAATCACCTGTCTCC	PASS	GGGGGAGGAGCAAGATGGCGGAGGAGTAGGGTCTCCAAATCACCTGTCTCC	intron_variant	MODIFIER	THEMIS	THEMIS	transcript	XM_038526751.1	protein_coding	2	c.145+11102_145+11103insGGAGACAGGTGATTTGGAGACCCTACTCCTCCGCCATCTTGCTCCTCCCC
chr1	67239613	G	T	PASS	T	intron_variant	MODIFIER	PTPRK	PTPRK	transcript	XM_038526752.1	protein_coding	13	c.2188+16390C>A
chr1	67239613	G	T	PASS	T	intron_variant	MODIFIER	PTPRK	PTPRK	transcript	XM_038526754.1	protein_coding	13	c.2188+16390C>A
chr1	67239613	G	T	PASS	T	intron_variant	MODIFIER	PTPRK	PTPRK	transcript	XM_038526755.1	protein_coding	13	c.2188+16390C>A
chr1	67239613	G	T	PASS	T	intron_variant	MODIFIER	PTPRK	PTPRK	transcript	XM_038526756.1	protein_coding	13	c.2188+16390C>A
chr1	67239613	G	T	PASS	T	intron_variant	MODIFIER	PTPRK	PTPRK	transcript	XM_038526753.1	protein_coding	13	c.2188+16390C>A
chr1	67239613	G	T	PASS	T	intron_variant	MODIFIER	PTPRK	PTPRK	transcript	XM_038526757.1	protein_coding	13	c.2188+16390C>A
chr1	67661726	T	C	PASS	C	intron_variant	MODIFIER	PTPRK	PTPRK	transcript	XM_038526752.1	protein_coding	1	c.94+44503A>G
chr1	67661726	T	C	PASS	C	intron_variant	MODIFIER	LOC106558822	LOC106558822	transcript	XR_005353912.1	pseudogene	3	n.323+14781T>C
[truncated: 32,137 more rows]
